# Supplementary material
Source: PubMed Central journal article supplement (PMC5223028)
Supplement: mmc1.pdf [file mmc1.pdf]

**The American Journal of Human Genetics, Volume 100**

## **Supplemental Data**

### **Genome-wide Association Study Identifies**

### **27 Loci Influencing Concentrations**

### **of Circulating Cytokines and Growth Factors**

**Ari V. Ahola-Olli, Peter Würtz, Aki S. Havulinna, Kristiina Aalto, Niina Pitkänen, Terho Lehtimäki, Mika Kähönen, Leo-Pekka Lyytikäinen, Emma Raitoharju, Ilkka Seppälä, Antti-Pekka Sarin, Samuli Ripatti, Aarne Palotie, Markus Perola, Jorma S. Viikari, Sirpa Jalkanen, Mikael Maksimow, Veikko Salomaa, Marko Salmi, Johannes Kettunen, and Olli T. Raitakari**

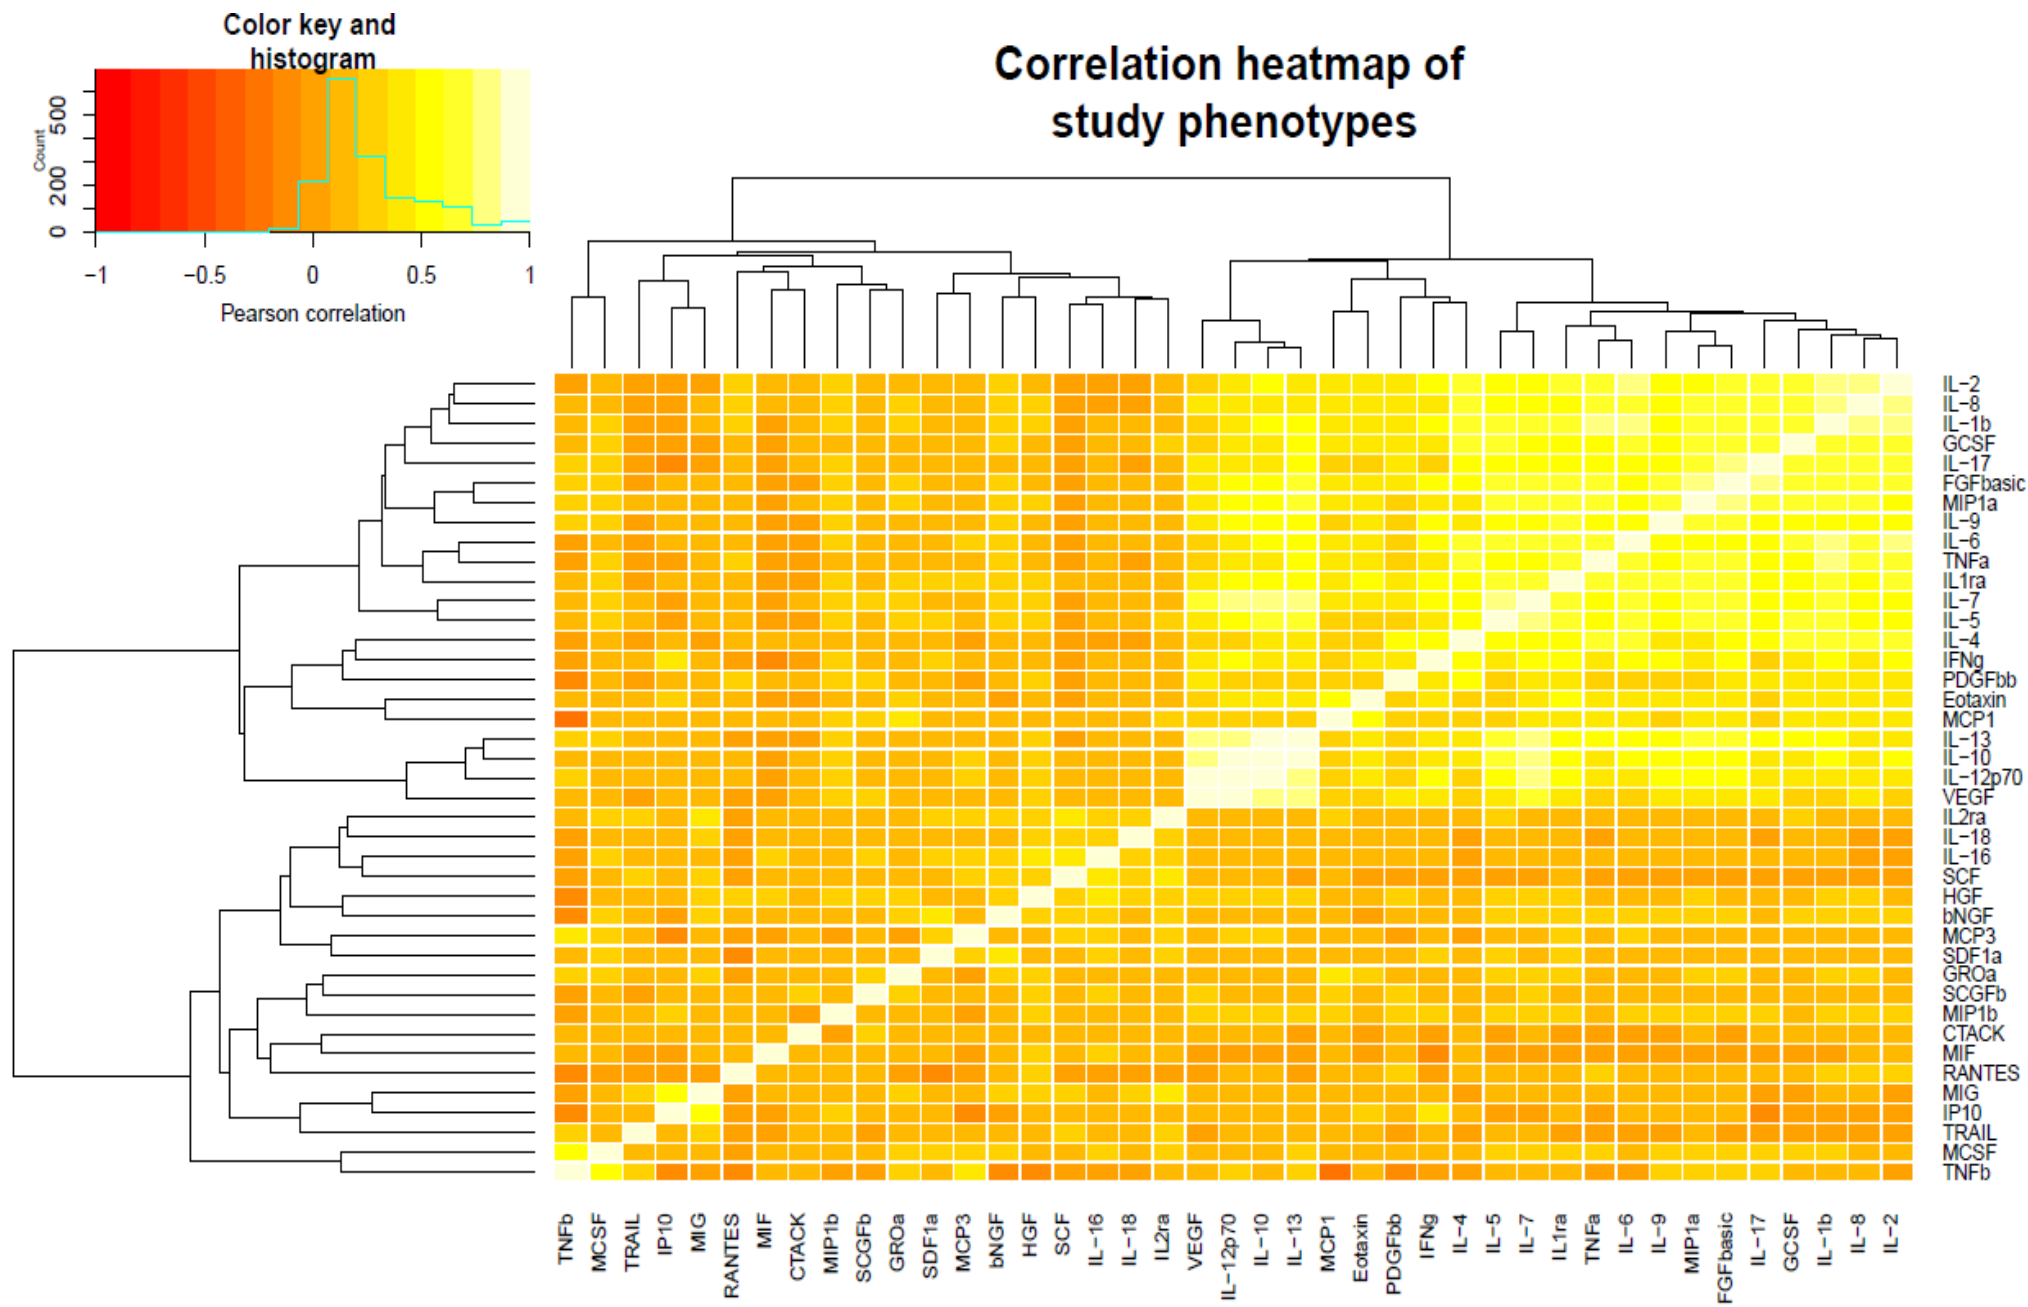

**Figure S1** Correlation heat map across study phenotypes. Interleukin-13, interleukin-10, interleukin-12p70 and VEGF form a tightly correlated module.

# bNGF

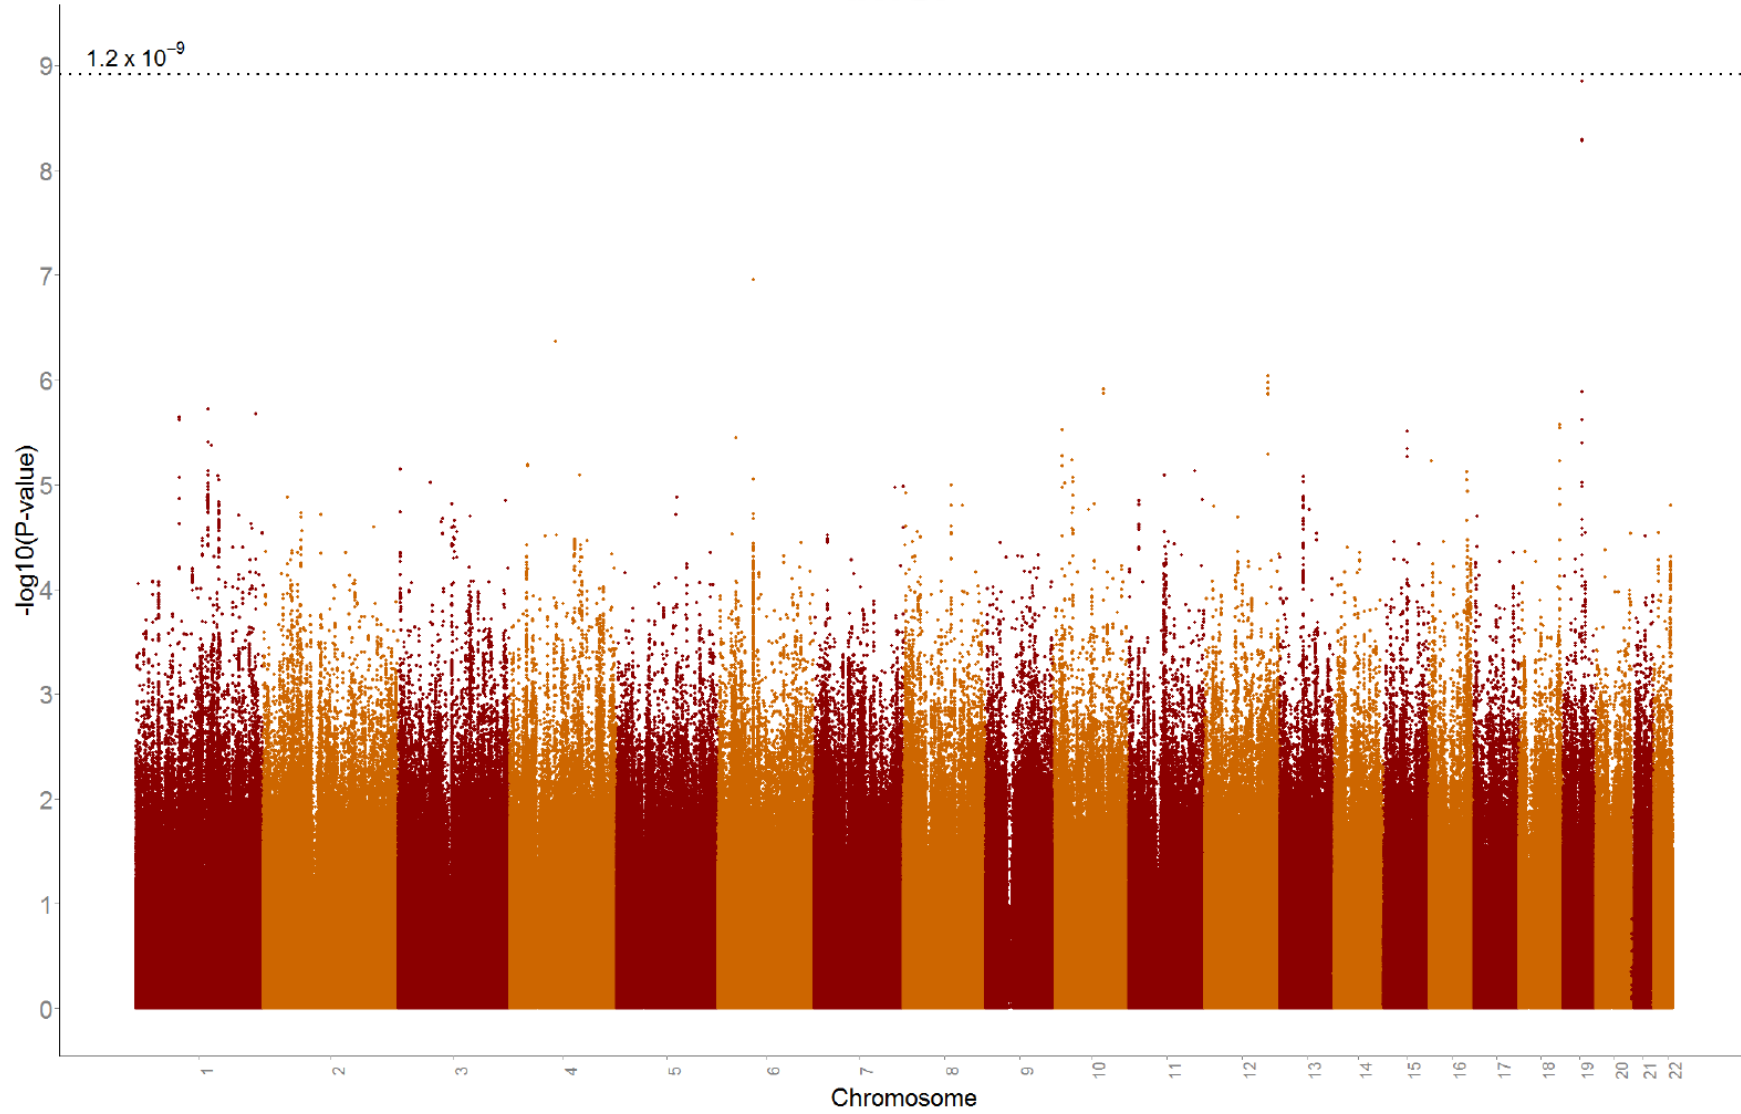

**Figure S2** Manhattan plot for beta nerve growth factor (bNGF)

# CTACK

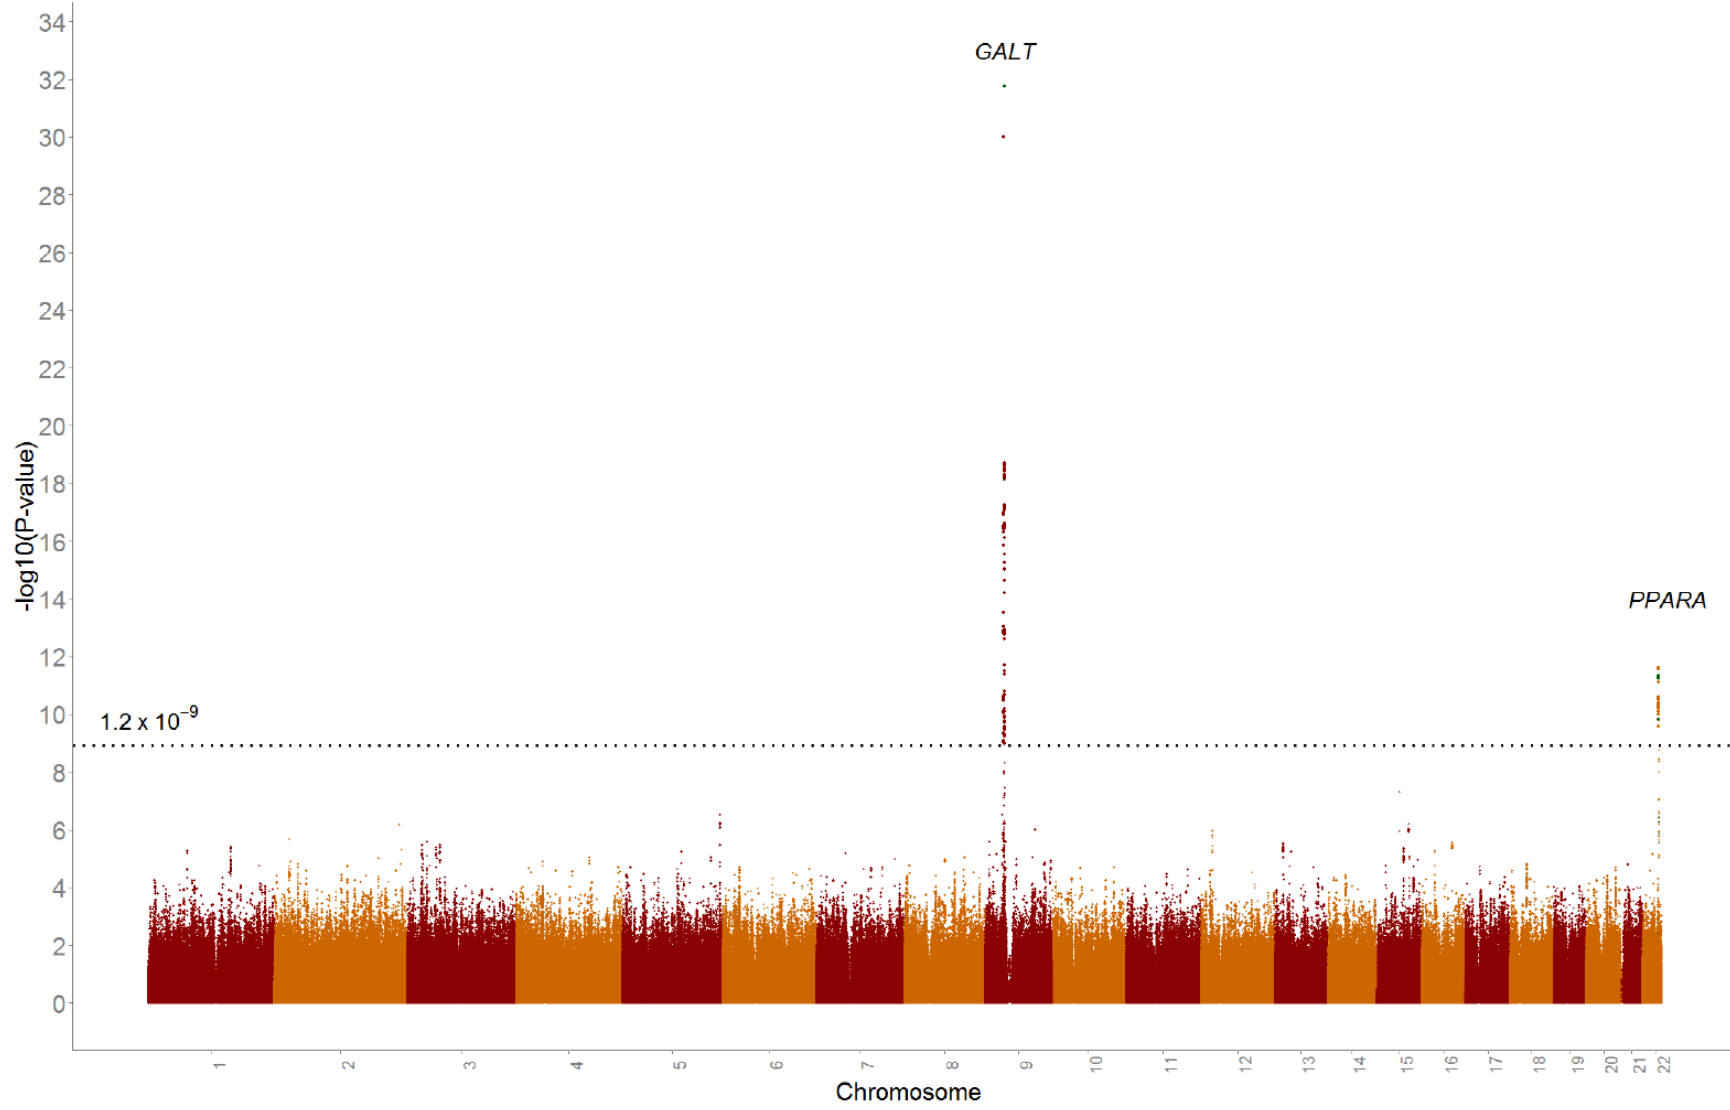

**Figure S3** Manhattan plot for Cutaneous T-cell attracting (CCL27; CTACK)

# Eotaxin

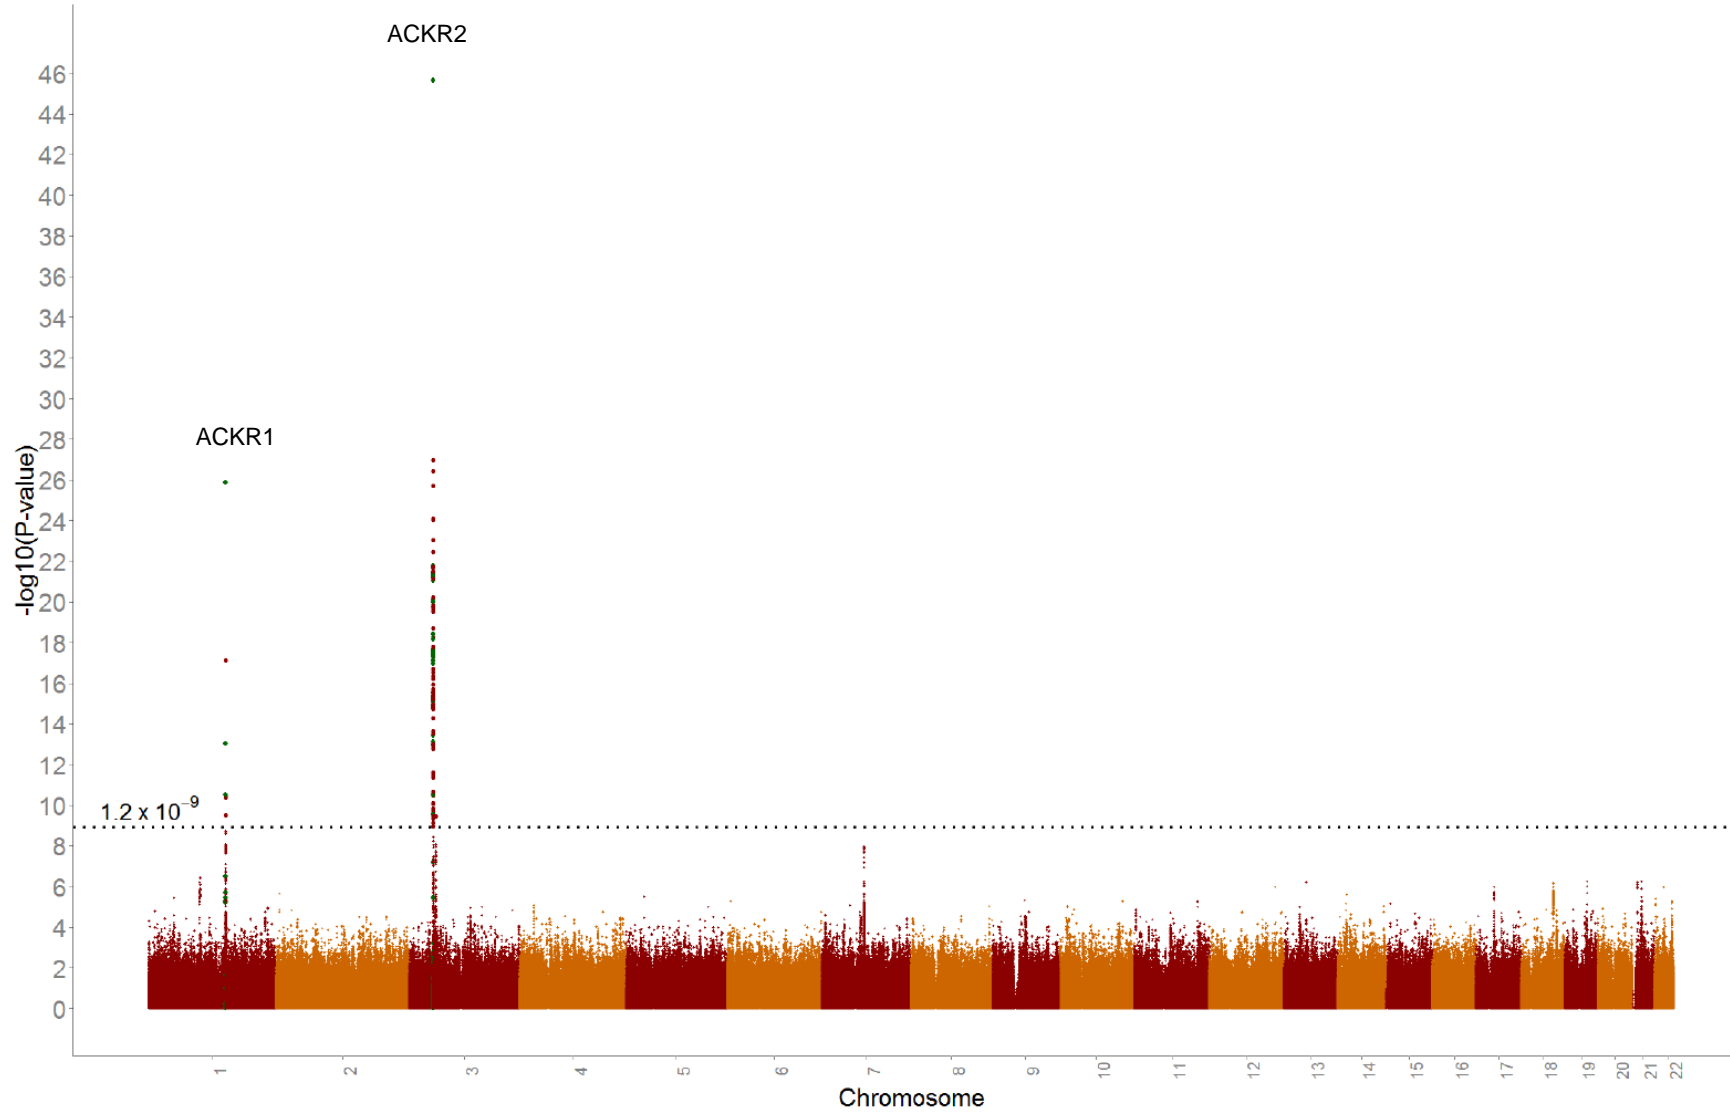

**Figure S4** Manhattan plot for Eotaxin.

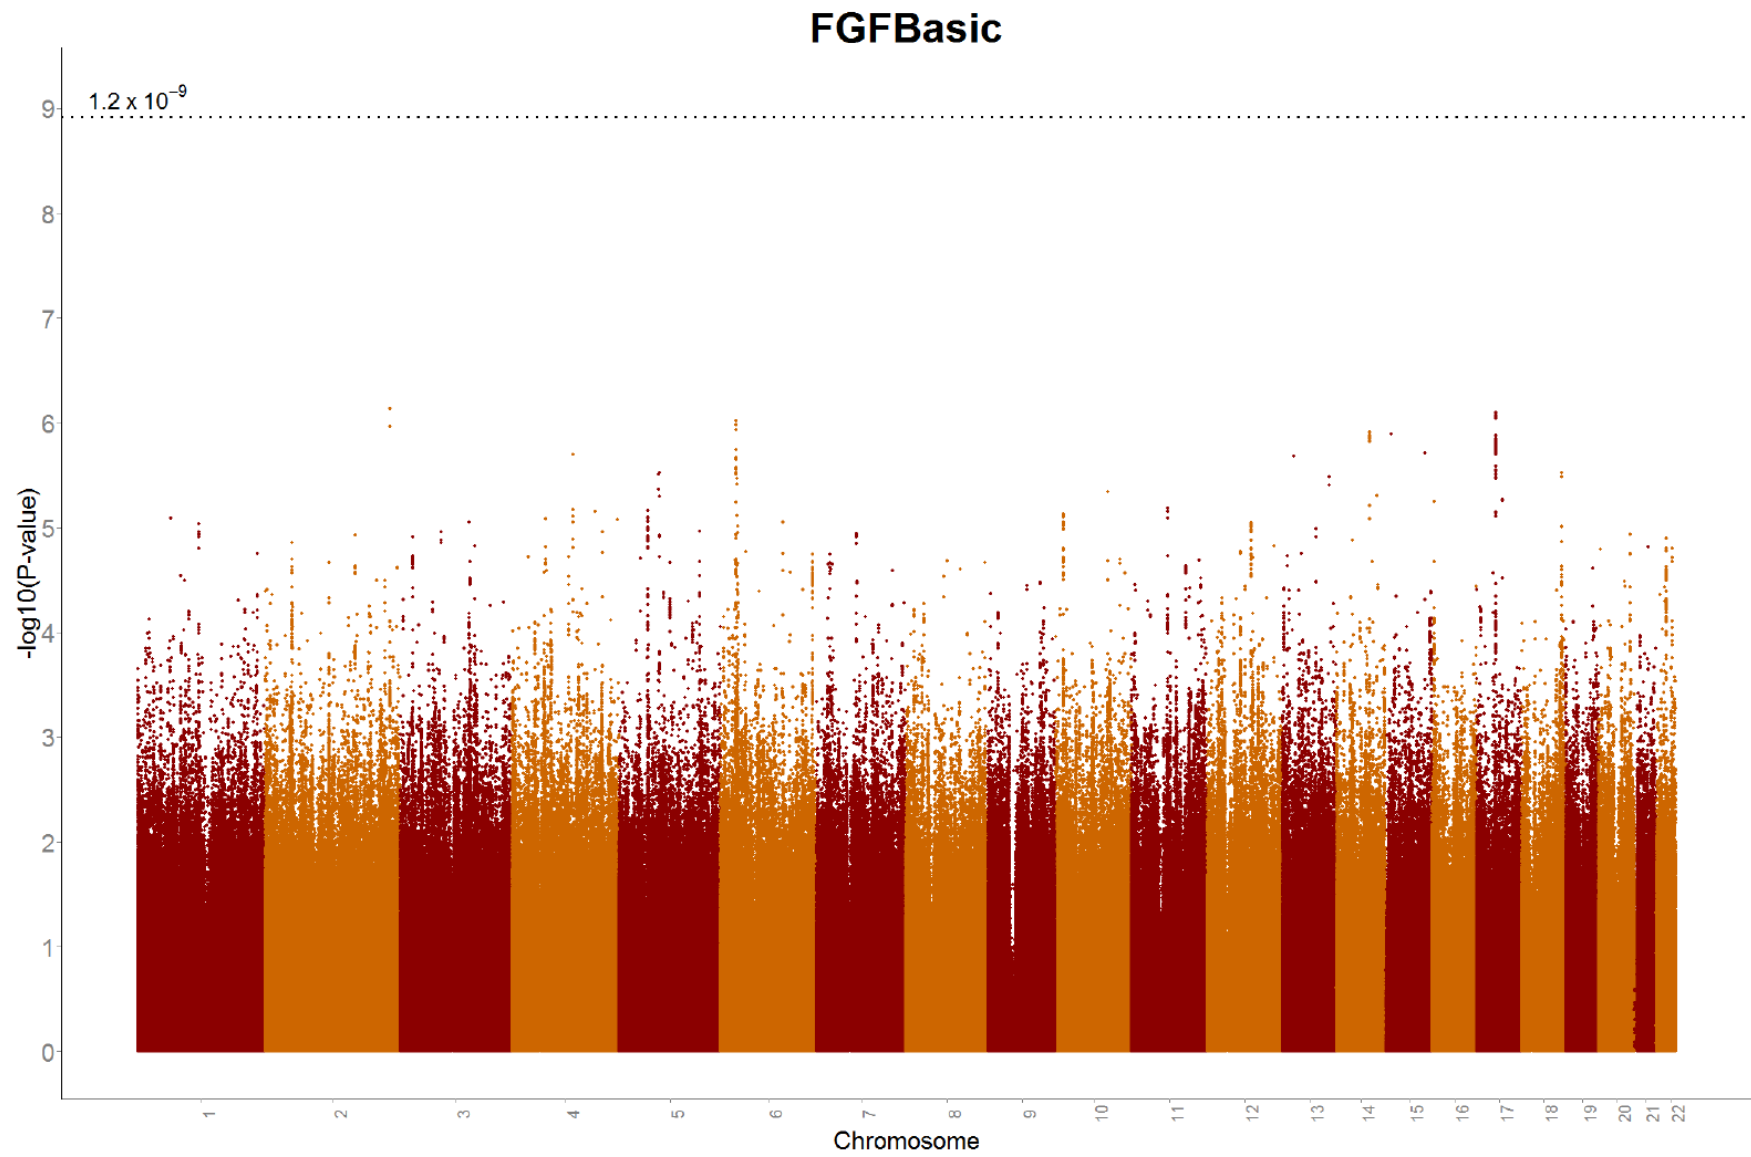

**Figure S5** Manhattan plot for basic fibroblast growth factor

# GROa

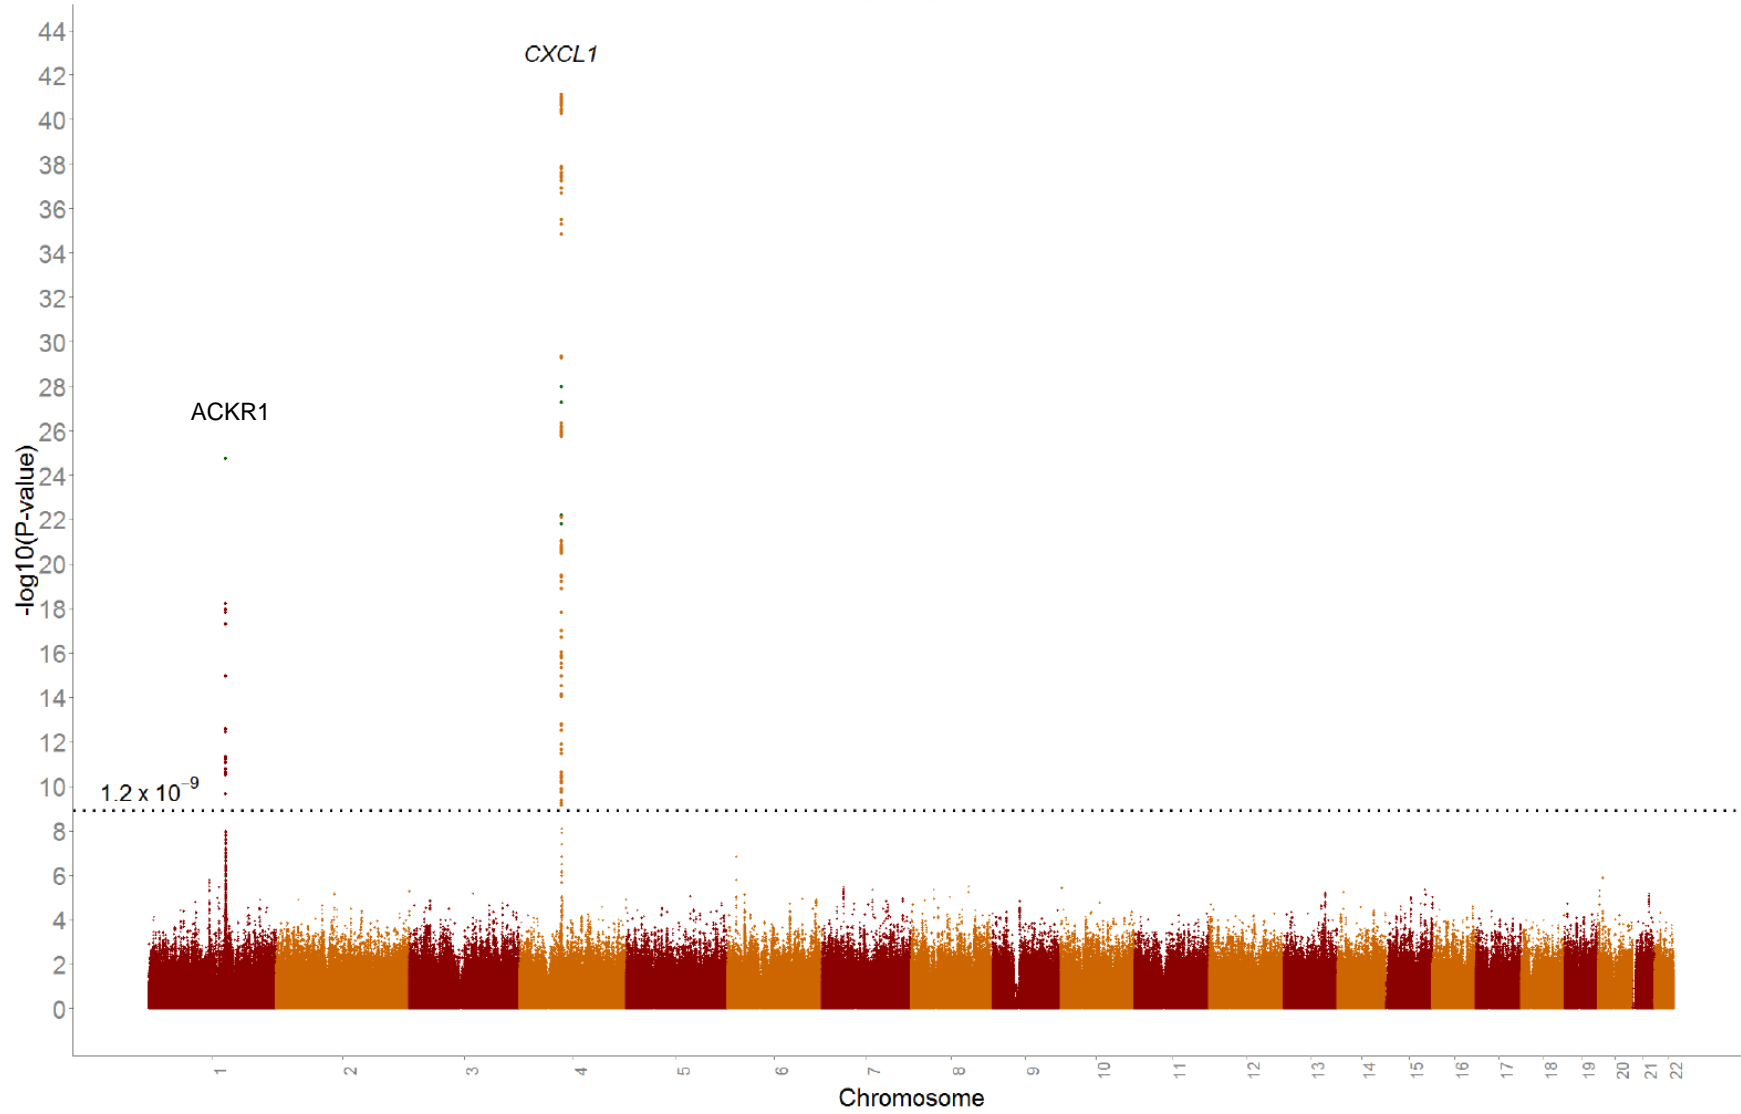

Manhattan plot for growth regulated oncogene- $\alpha$  (GROa; CXCL1)

Figure S6

# GCSF

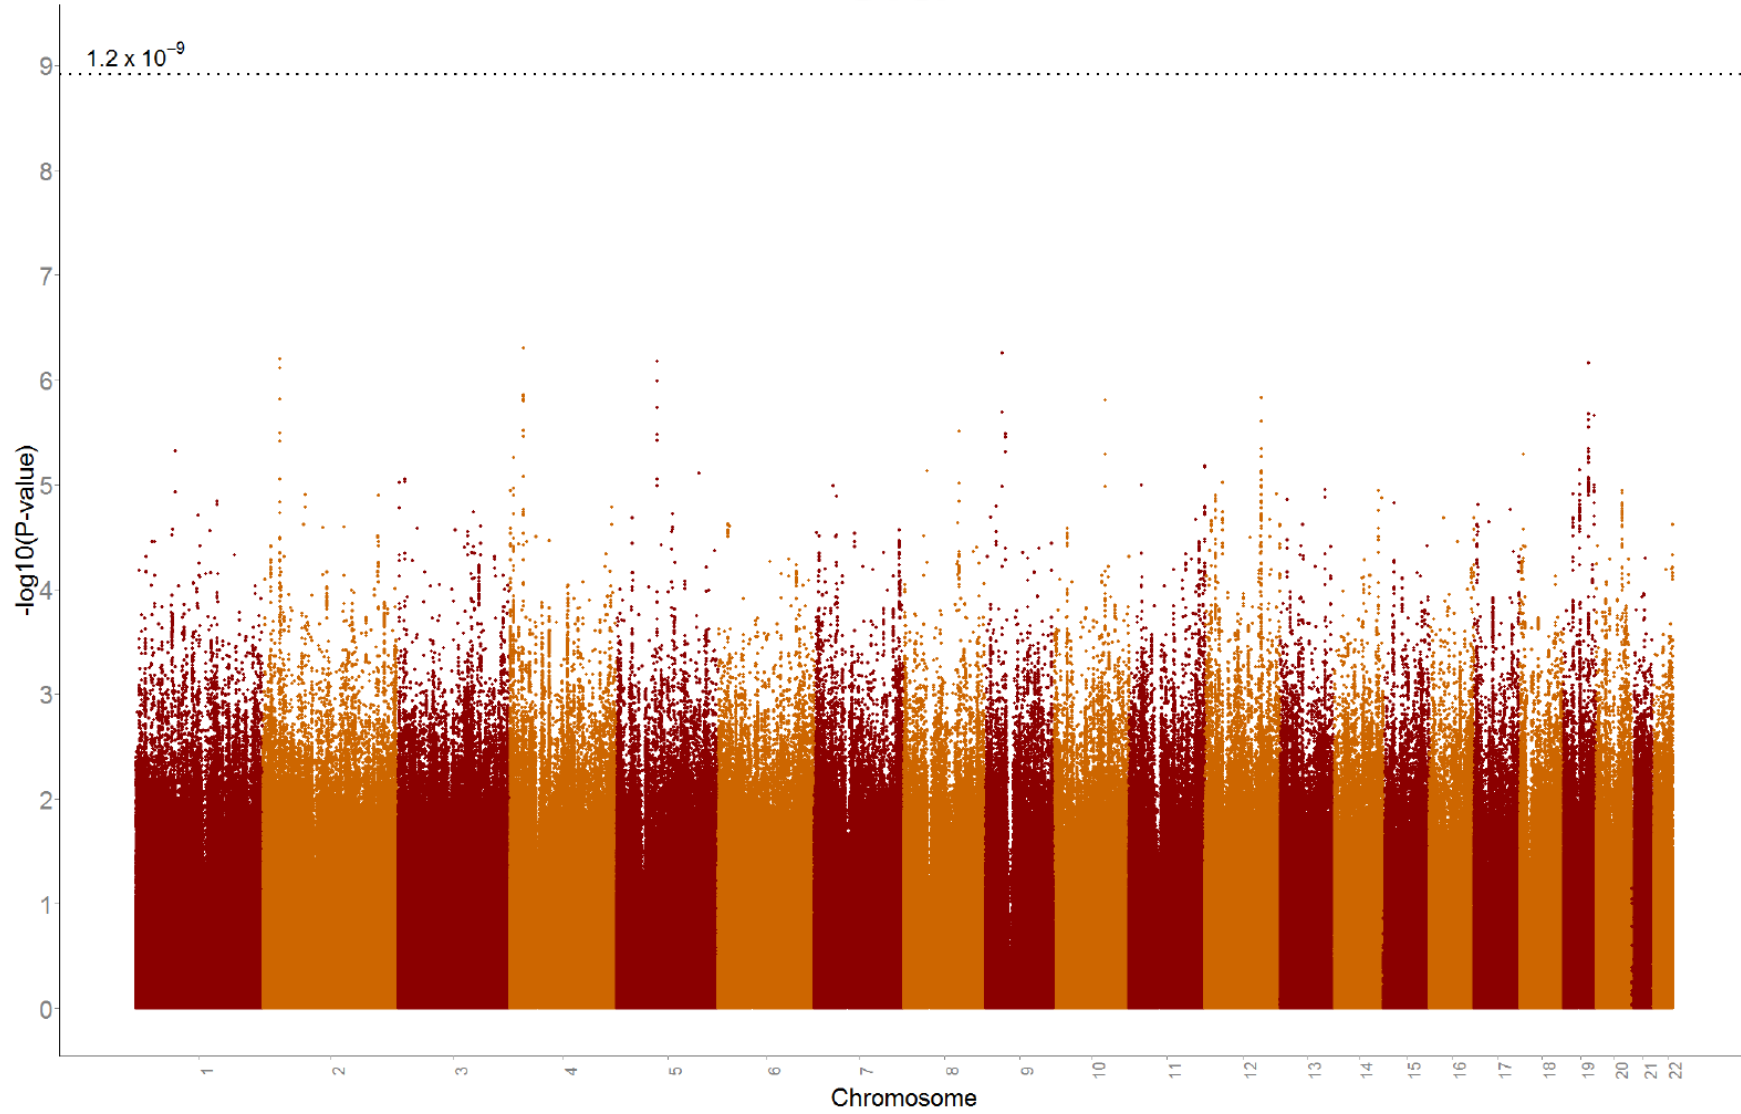

Manhattan plot for granulocyte colony-stimulating factor (GCSF).

**Figure S7**



# HGF

*HGF*

*HGFAC*

$1.2 \times 10^{-9}$

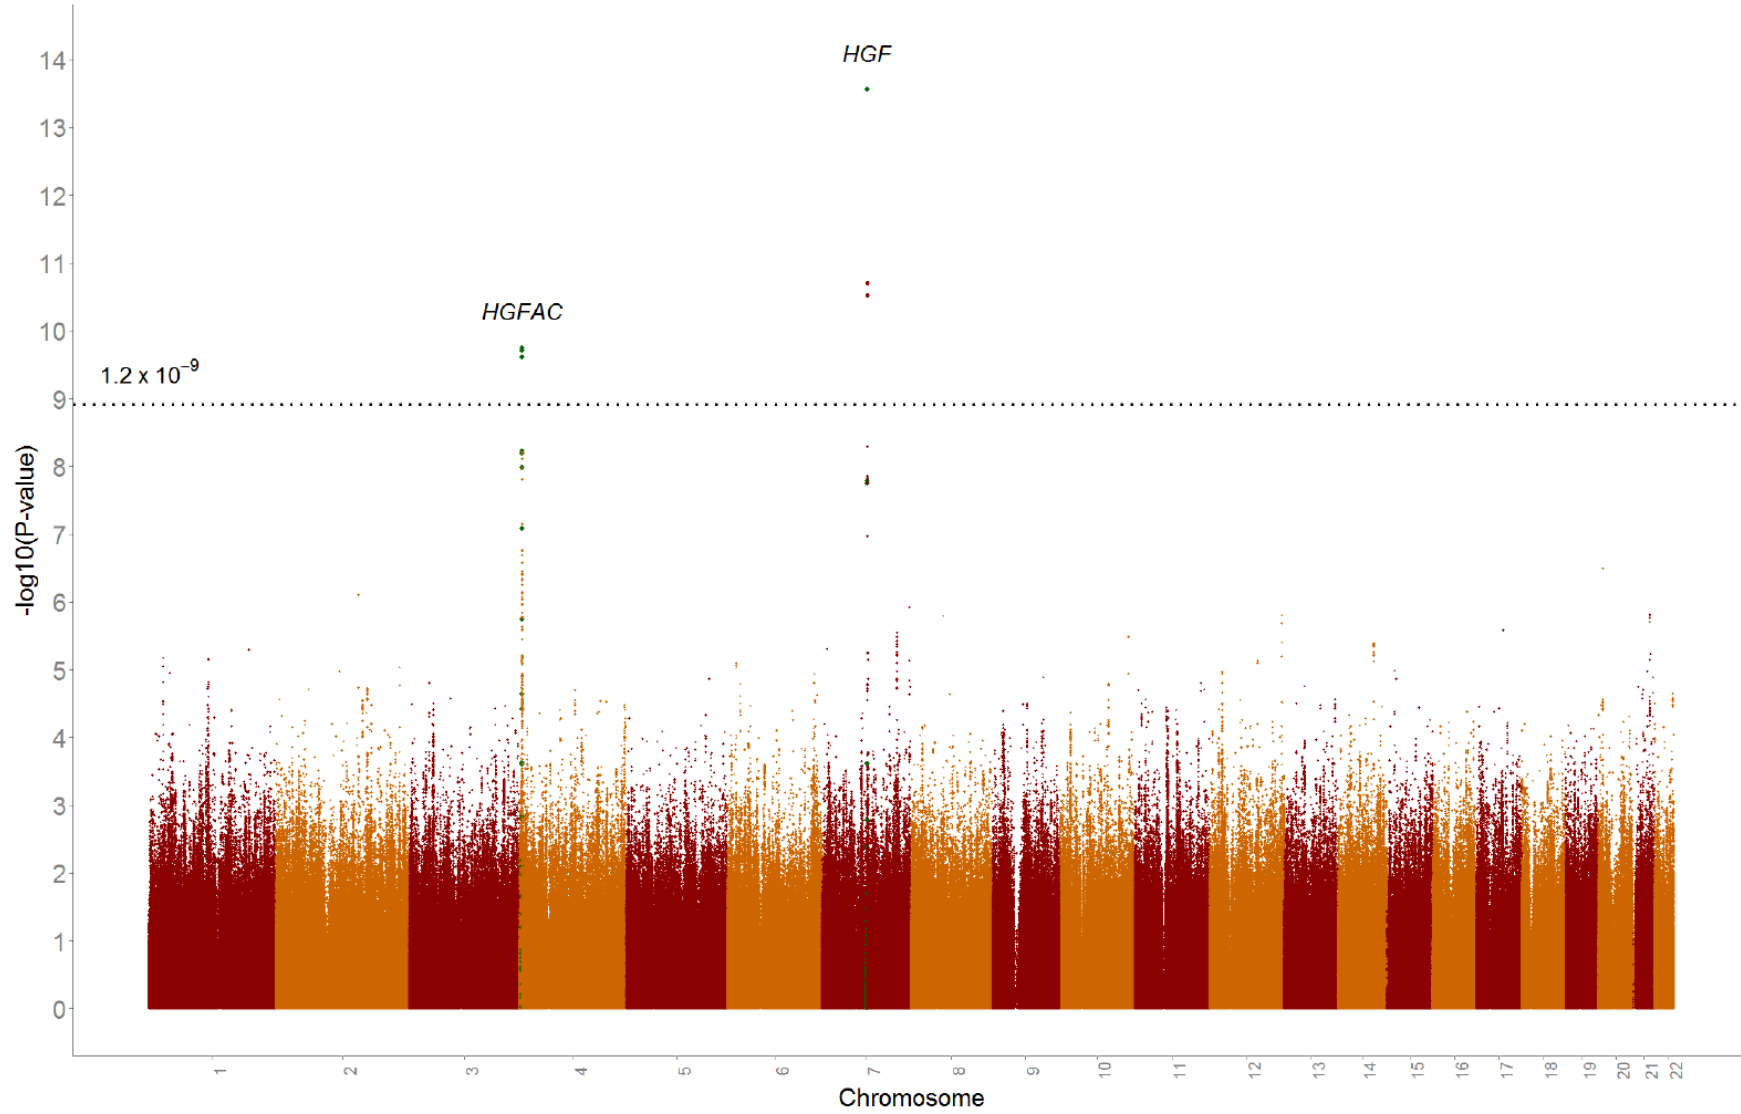

Manhattan plot for hepatocyte growth factor (HGF)

Figure S8

# IFNg

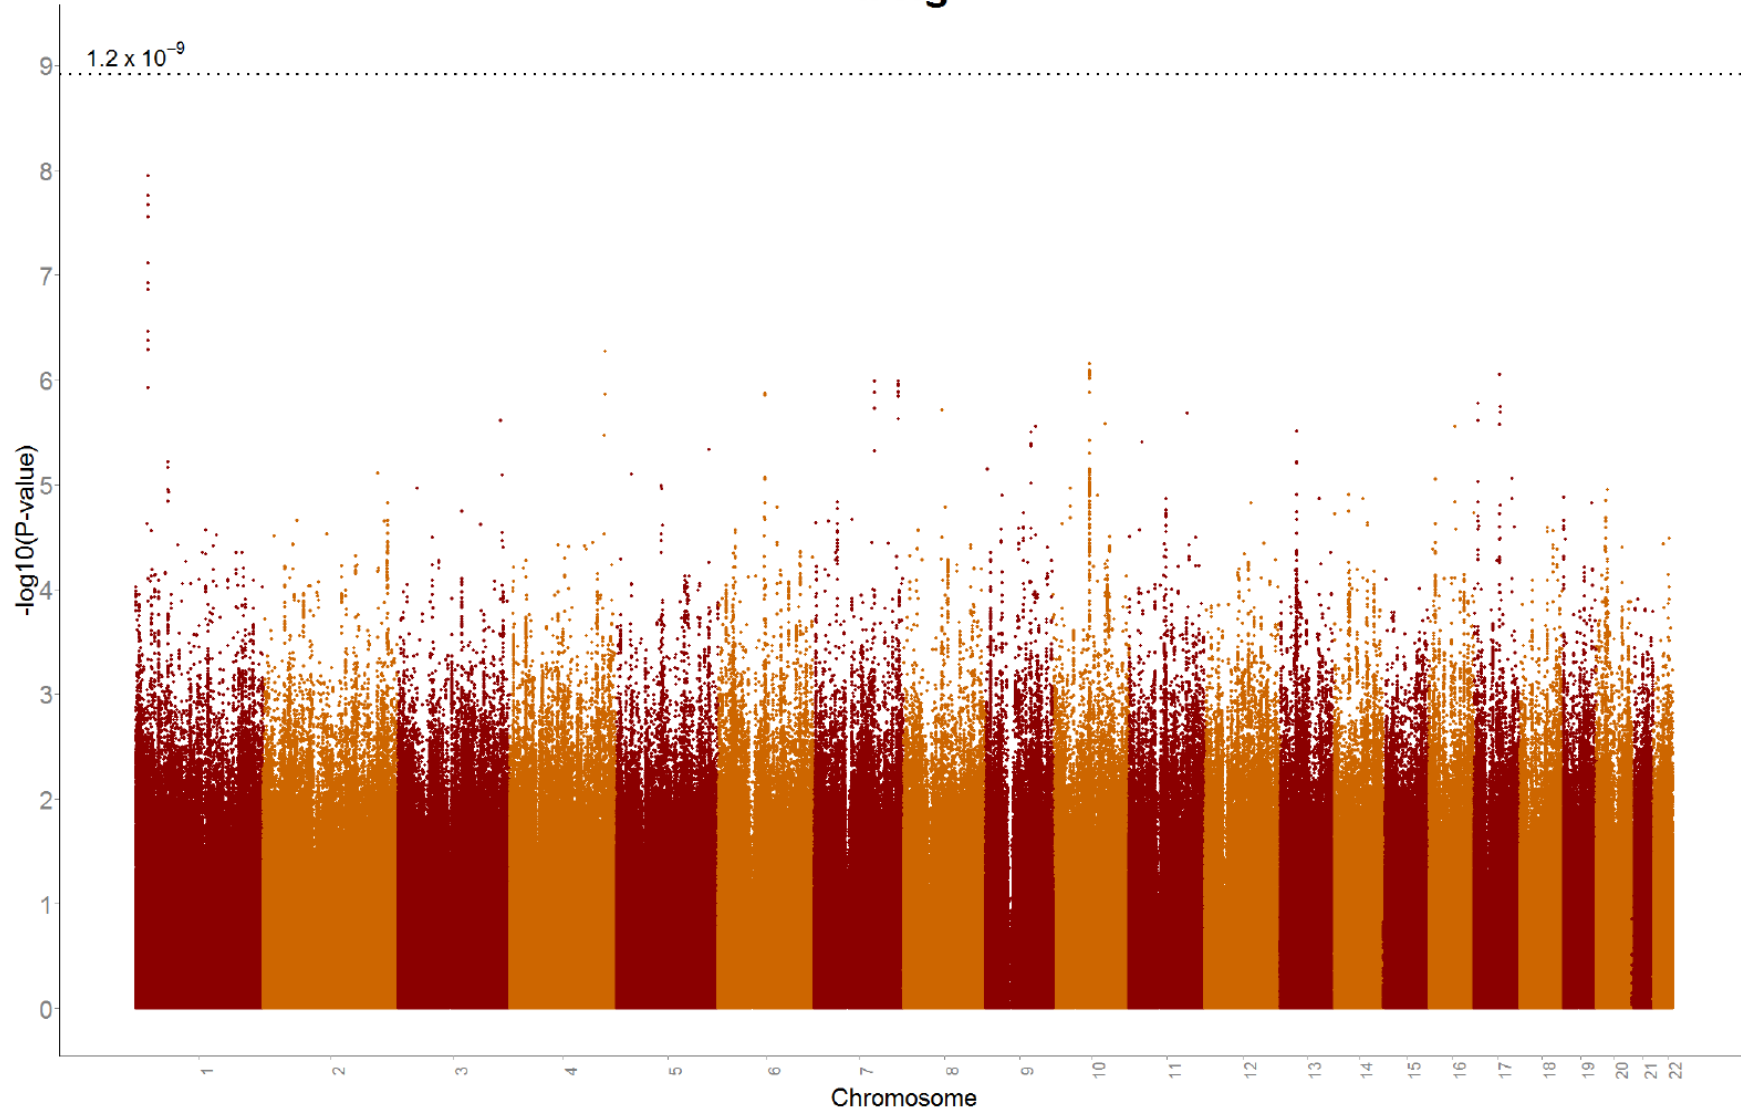

Manhattan plot for interferon gamma (IFNg).

**Figure S9**

# Interleukin-1b

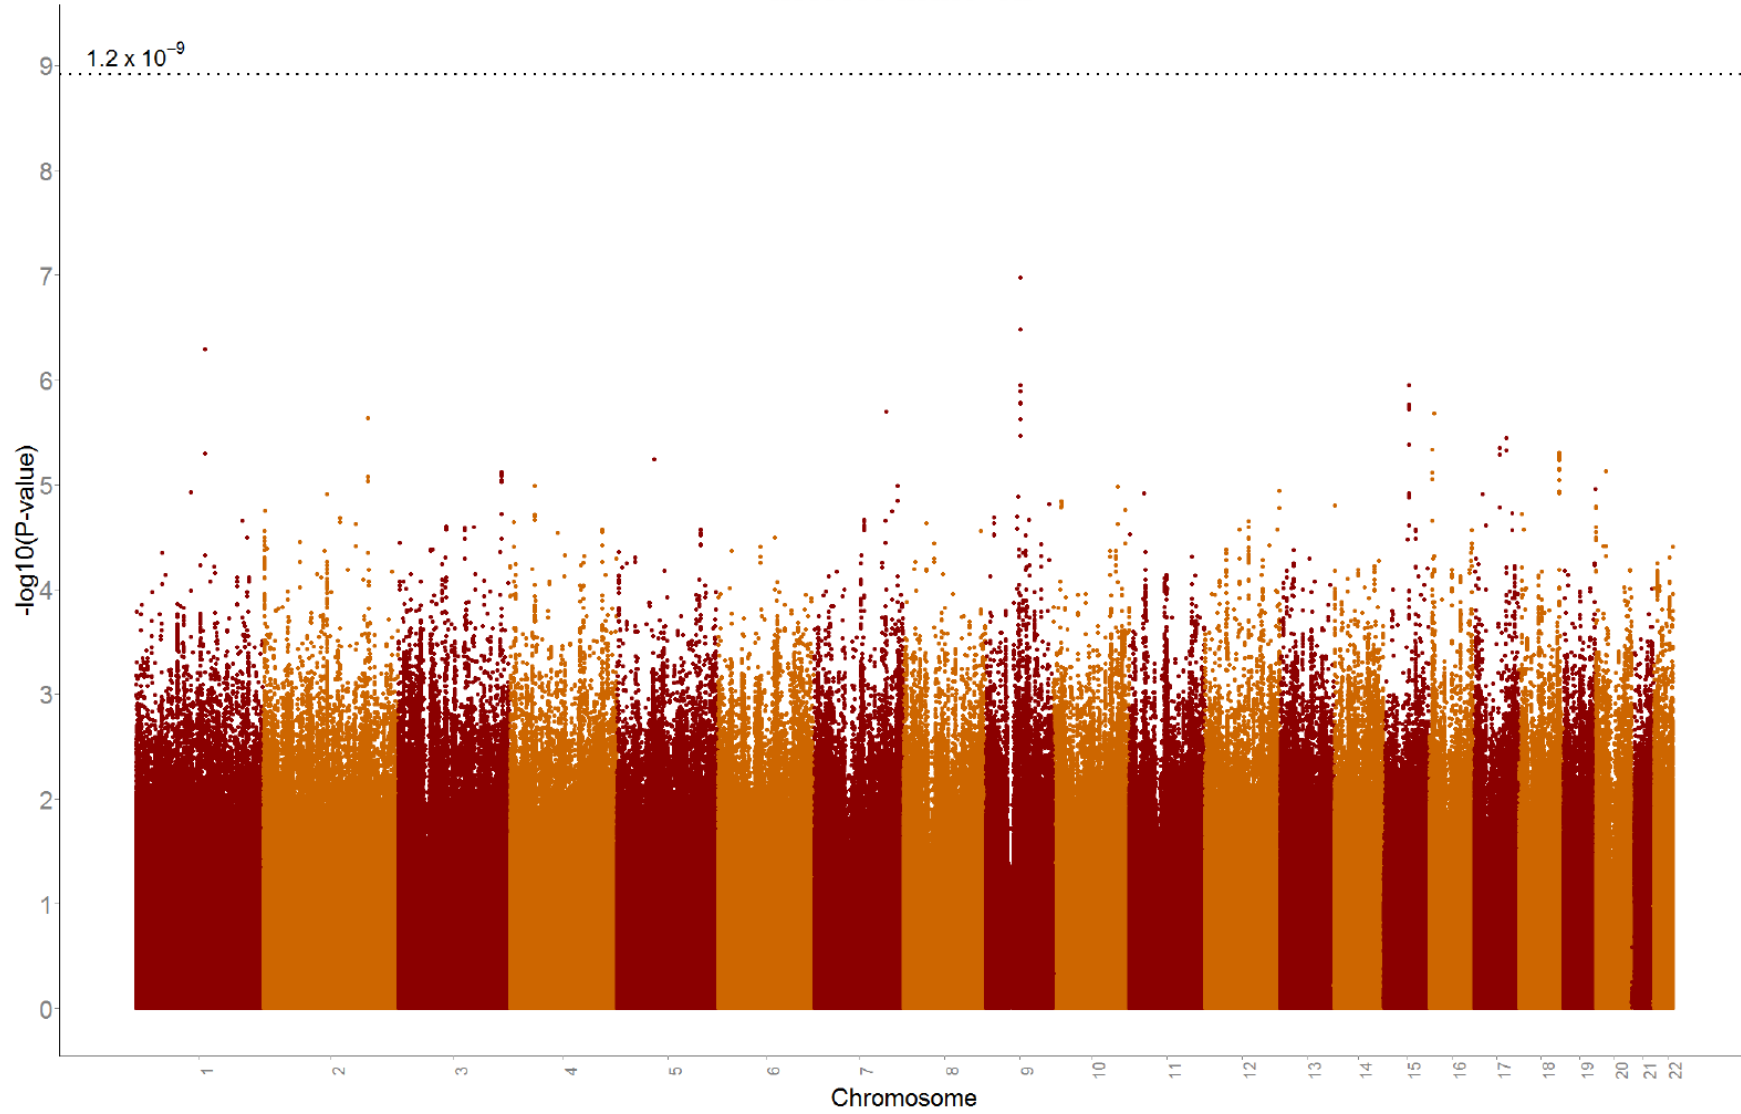

Manhattan plot for interleukin-1-beta.

**Figure S10**

# Interleukin-1 receptor alpha

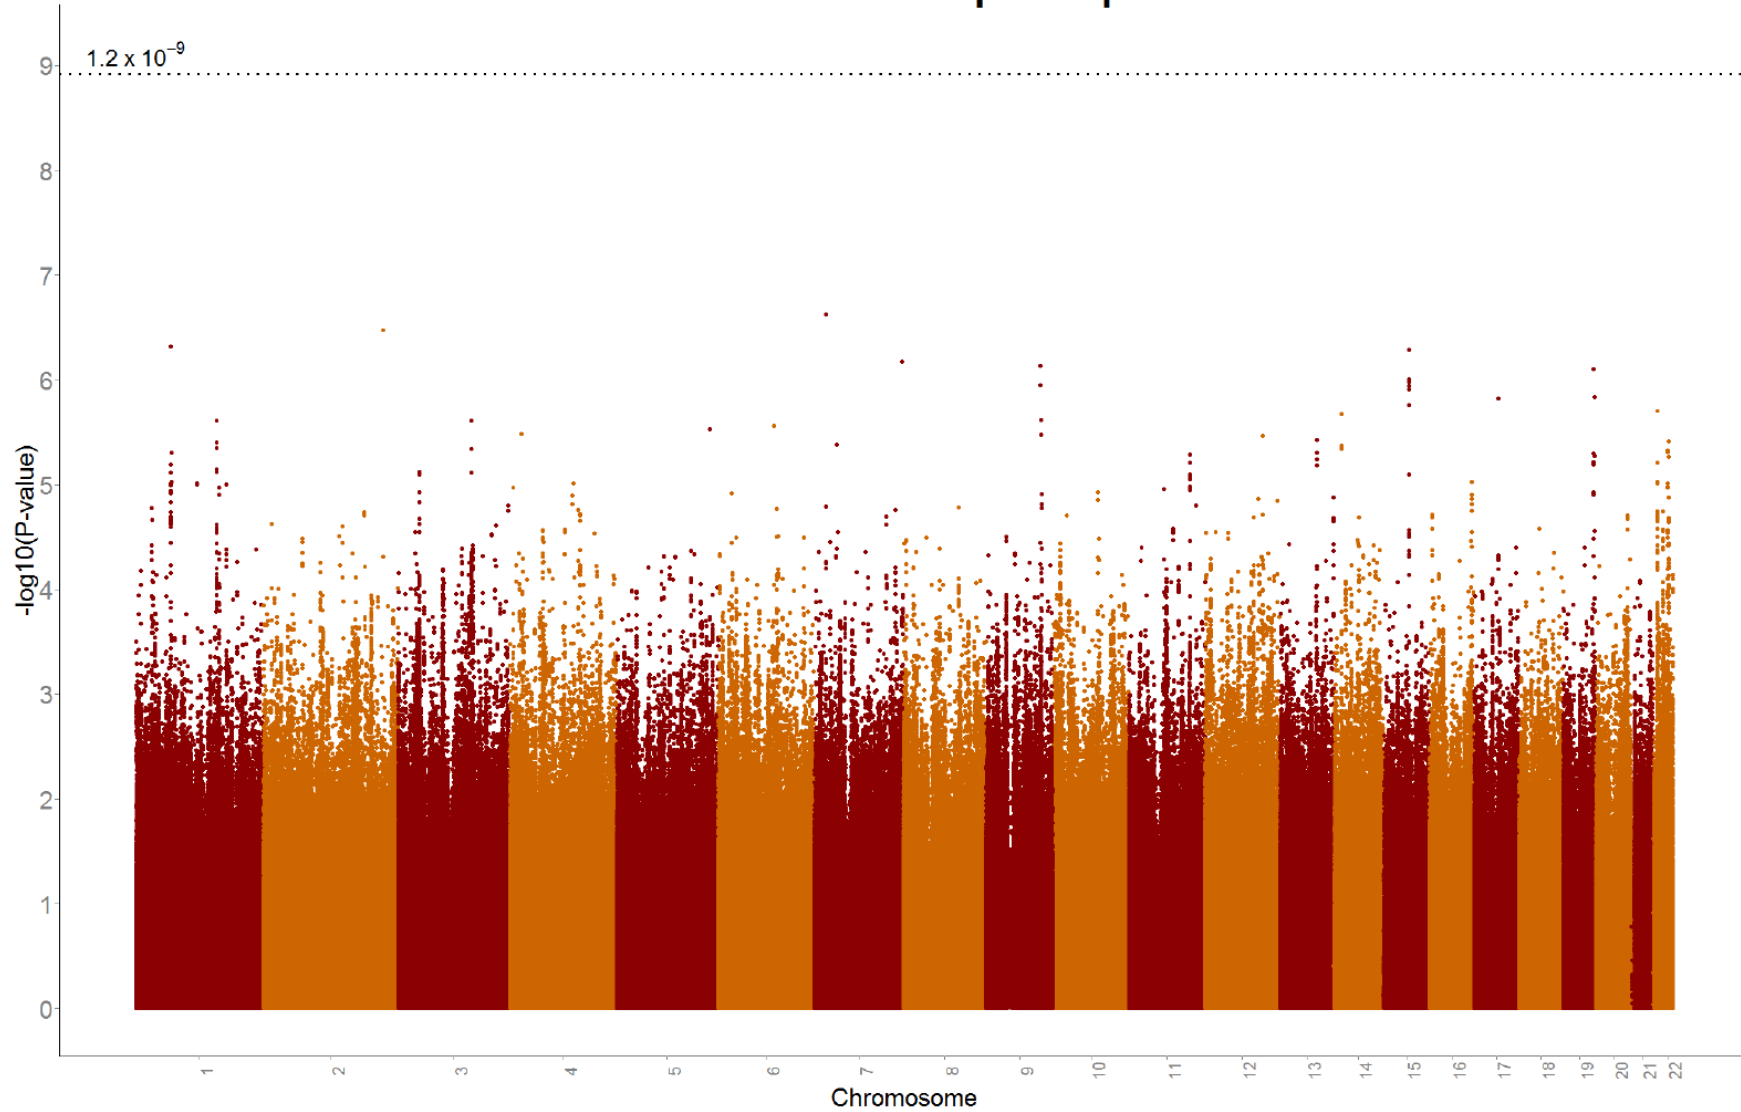

Manhattan plot for interleukin-1 receptor alpha

**Figure S11**

# Interleukin-2

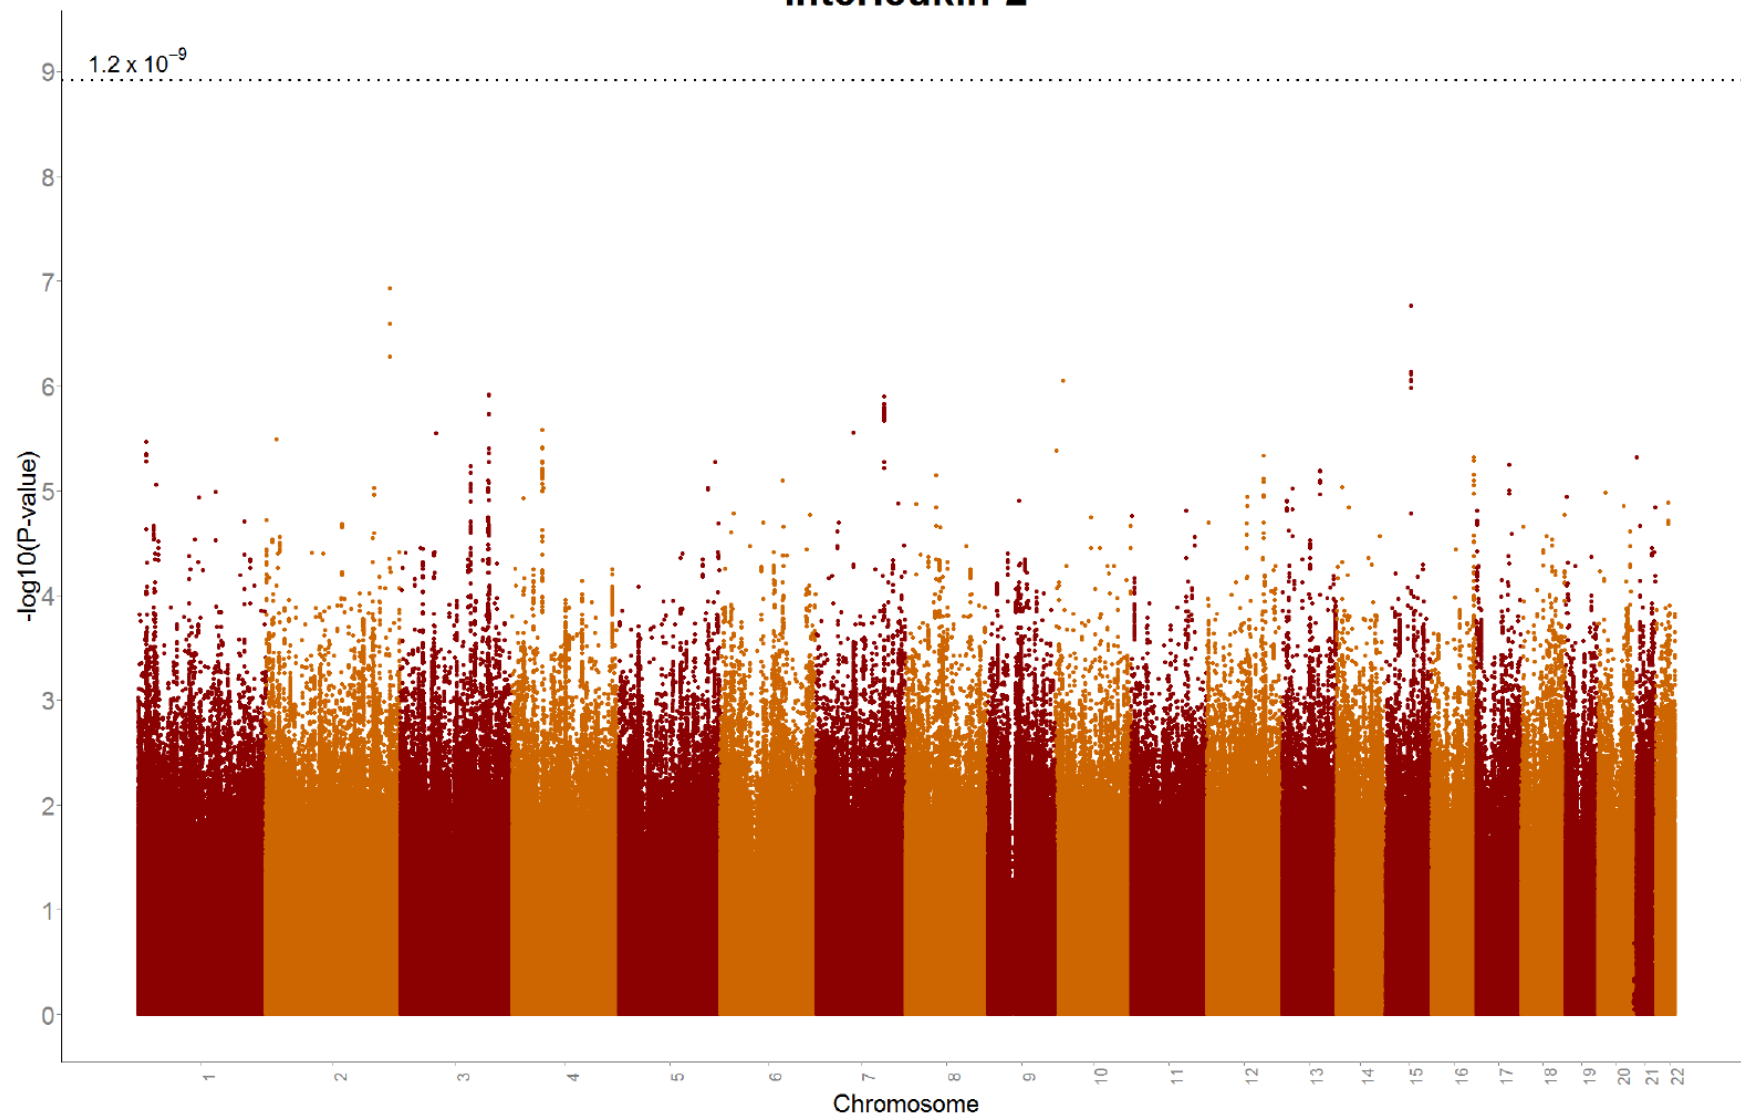

Manhattan plot for interleukin-2.

Figure S12

# Interleukin-2 receptor alpha

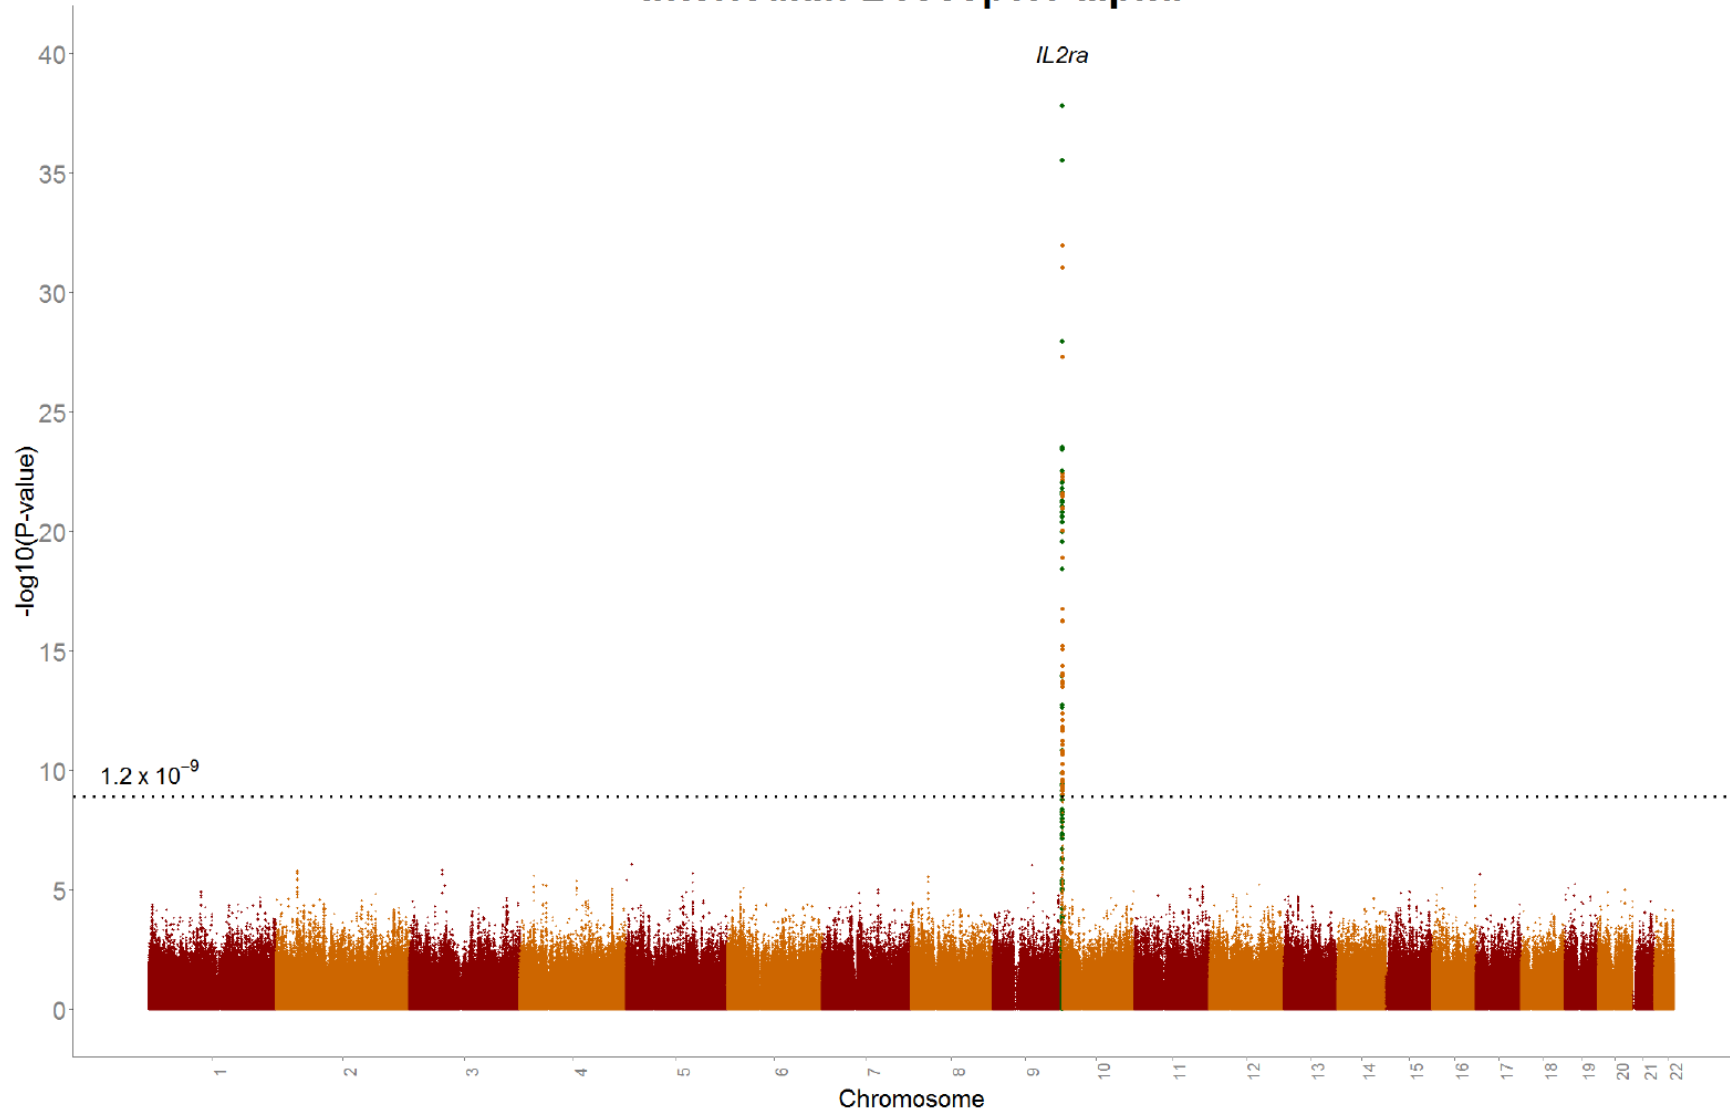

Manhattan plot for interleukin-2 receptor alpha.

**Figure S13**

# Interleukin-4

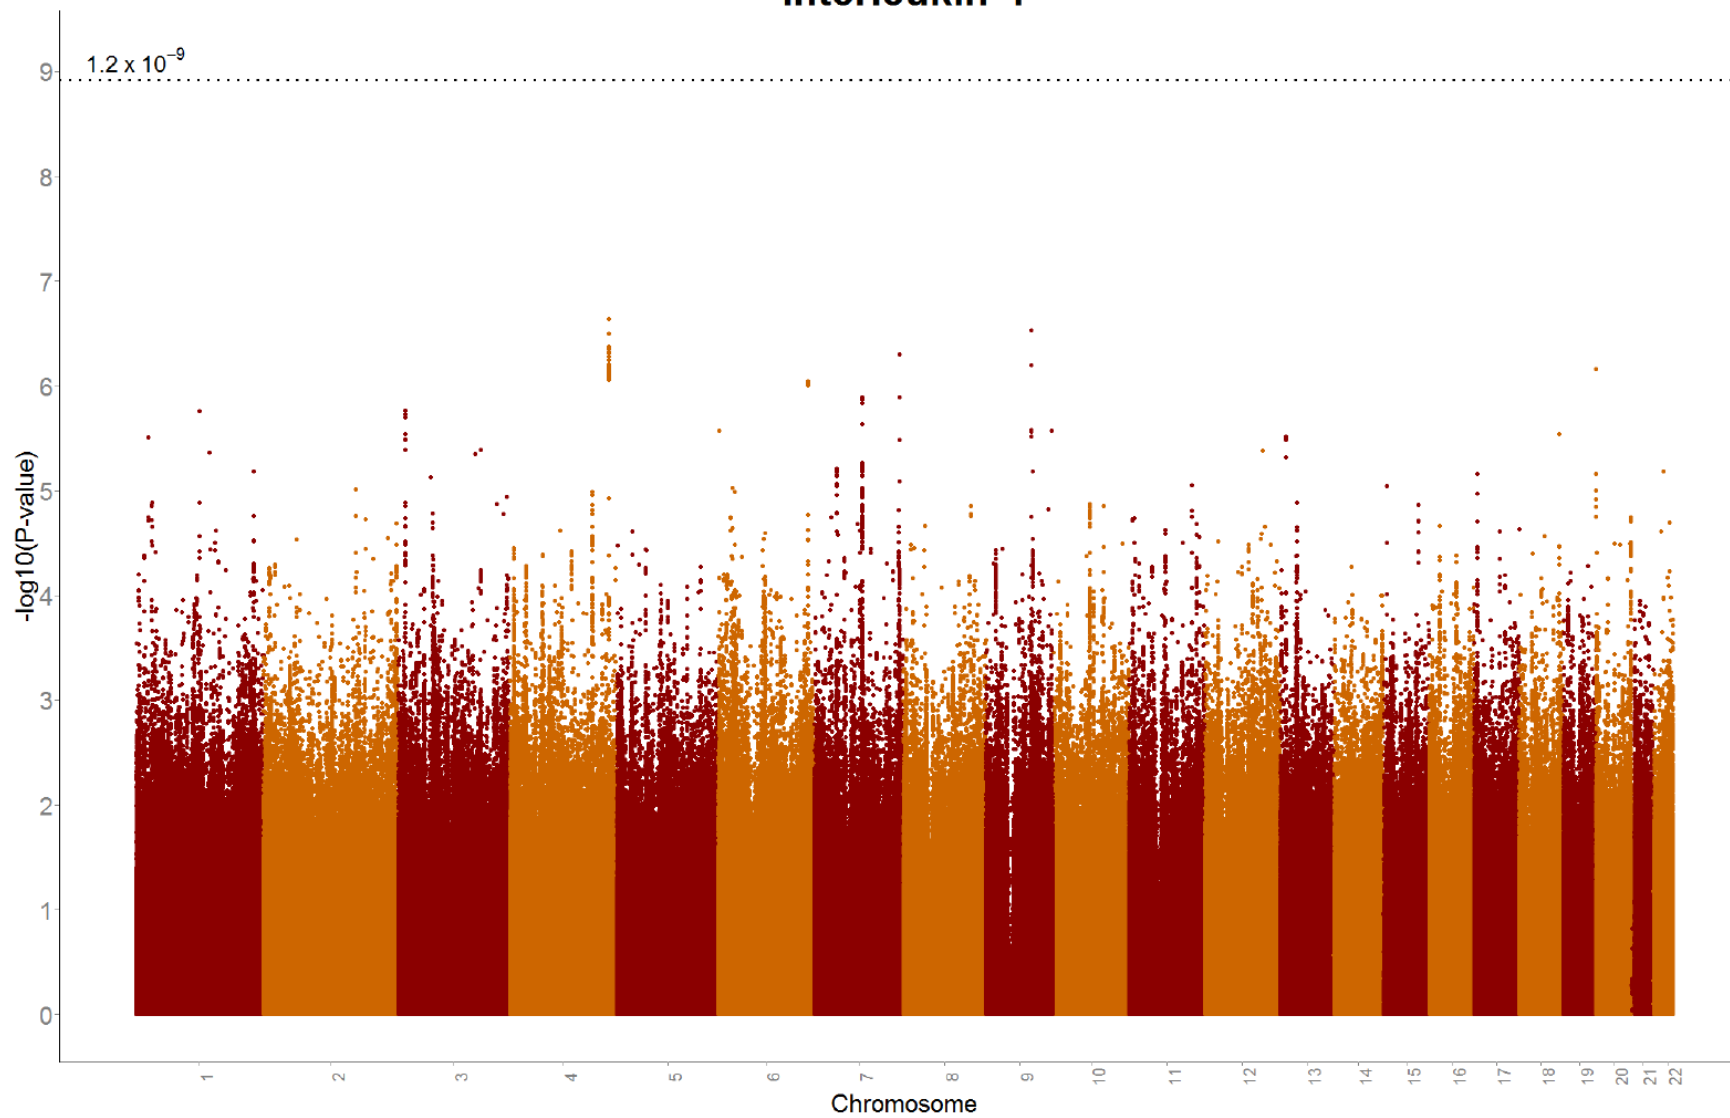

Manhattan plot for interleukin-4.

**Figure S14**

# Interleukin-5

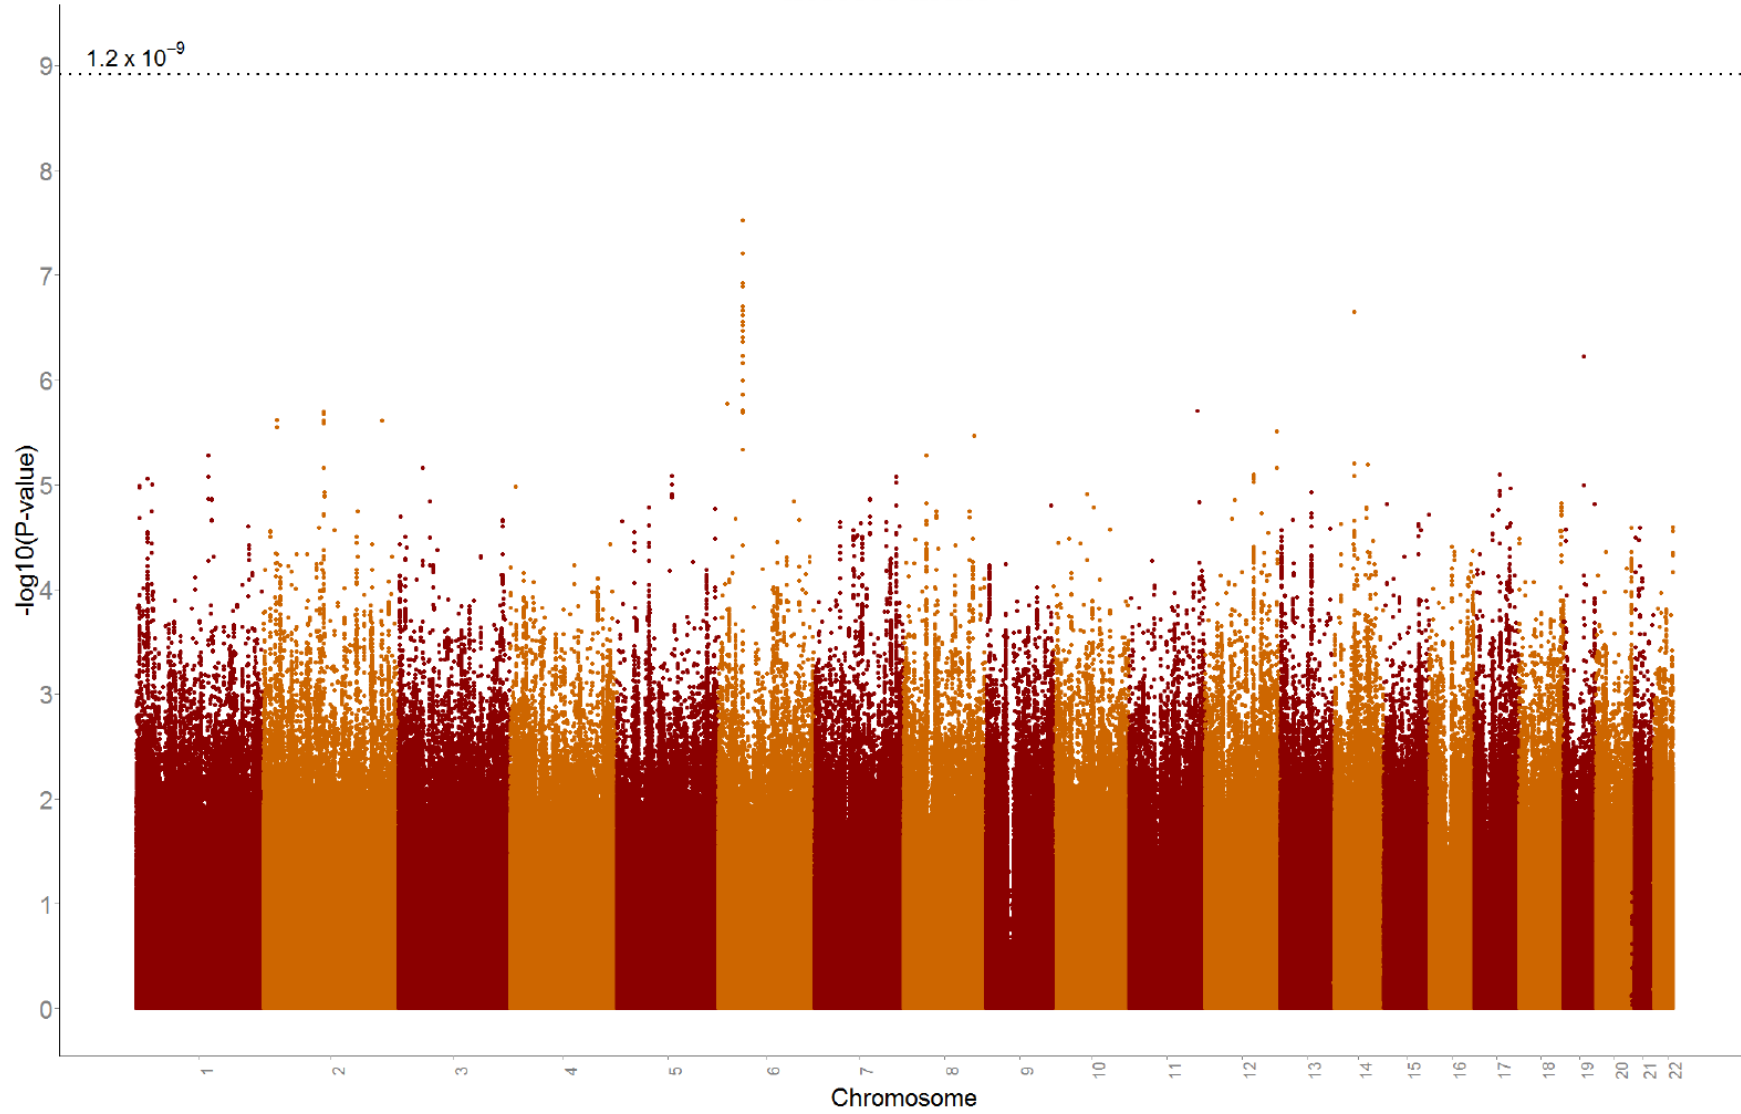

Manhattan plot for interleukin-5.

Figure S15



# Interleukin-6

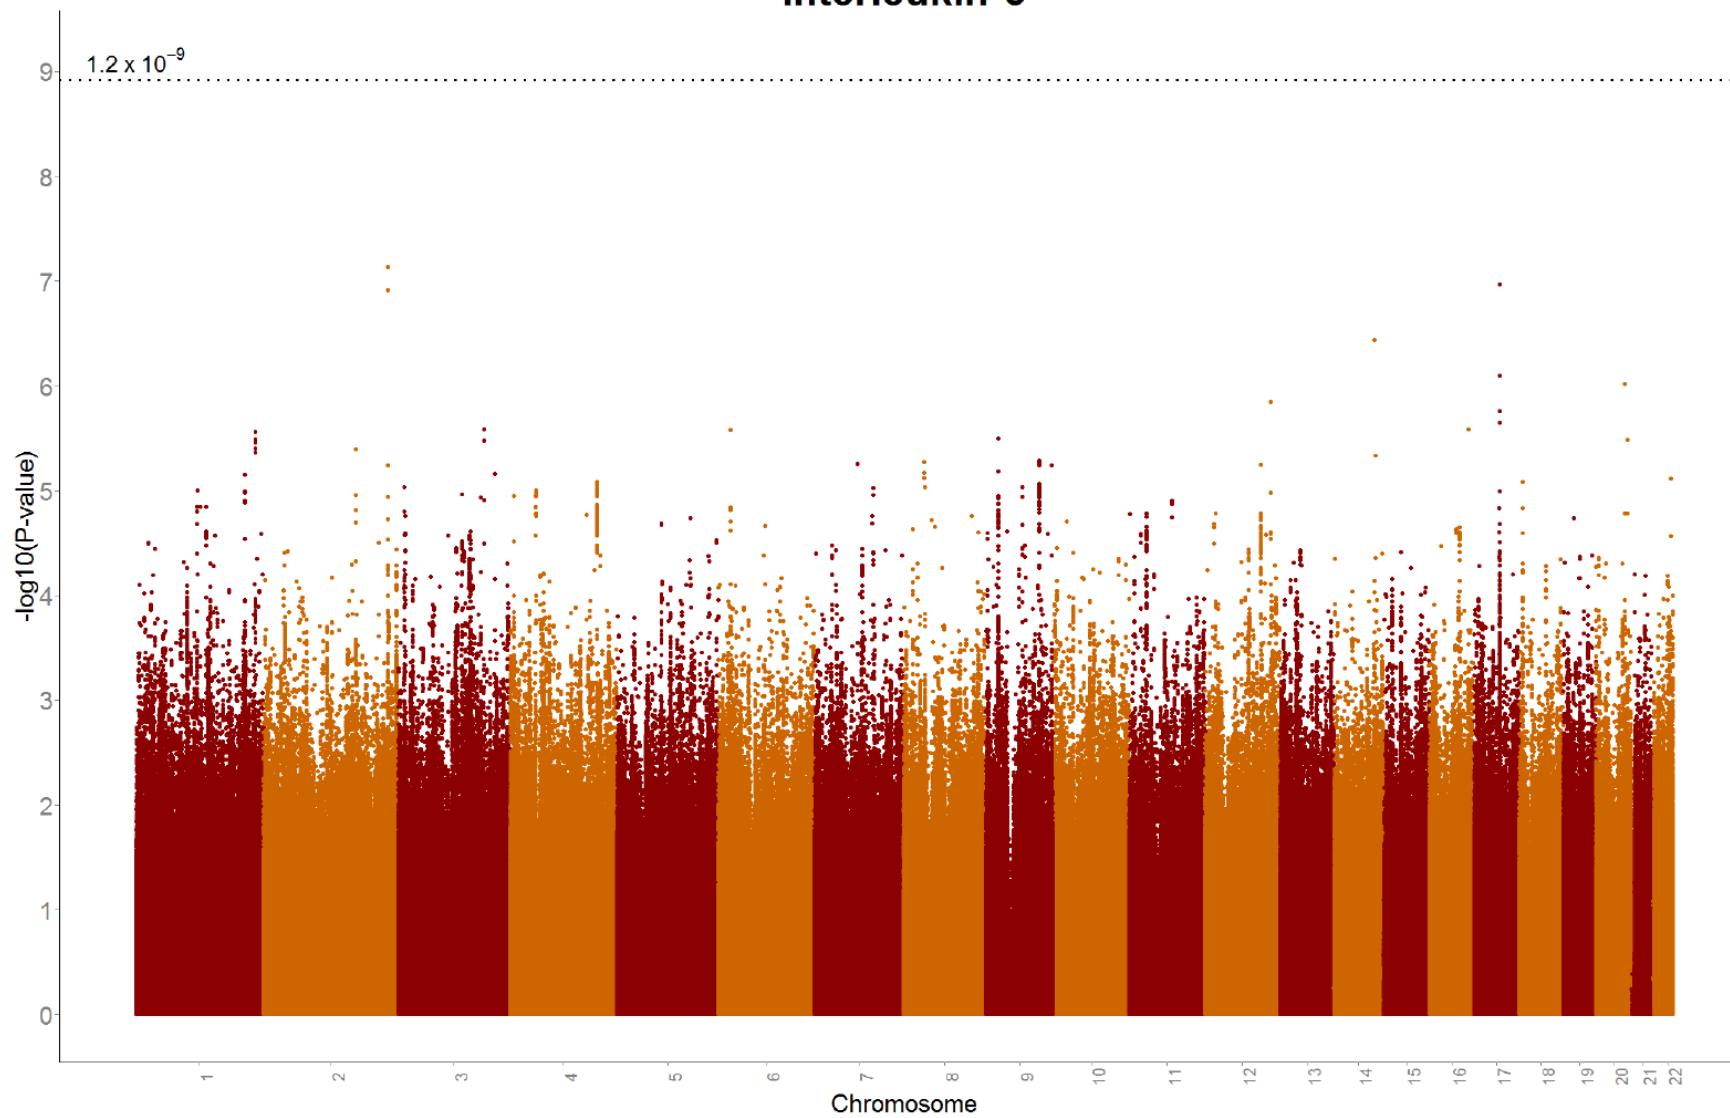

Manhattan plot for interleukin-6.

Figure S16

# Interleukin-7

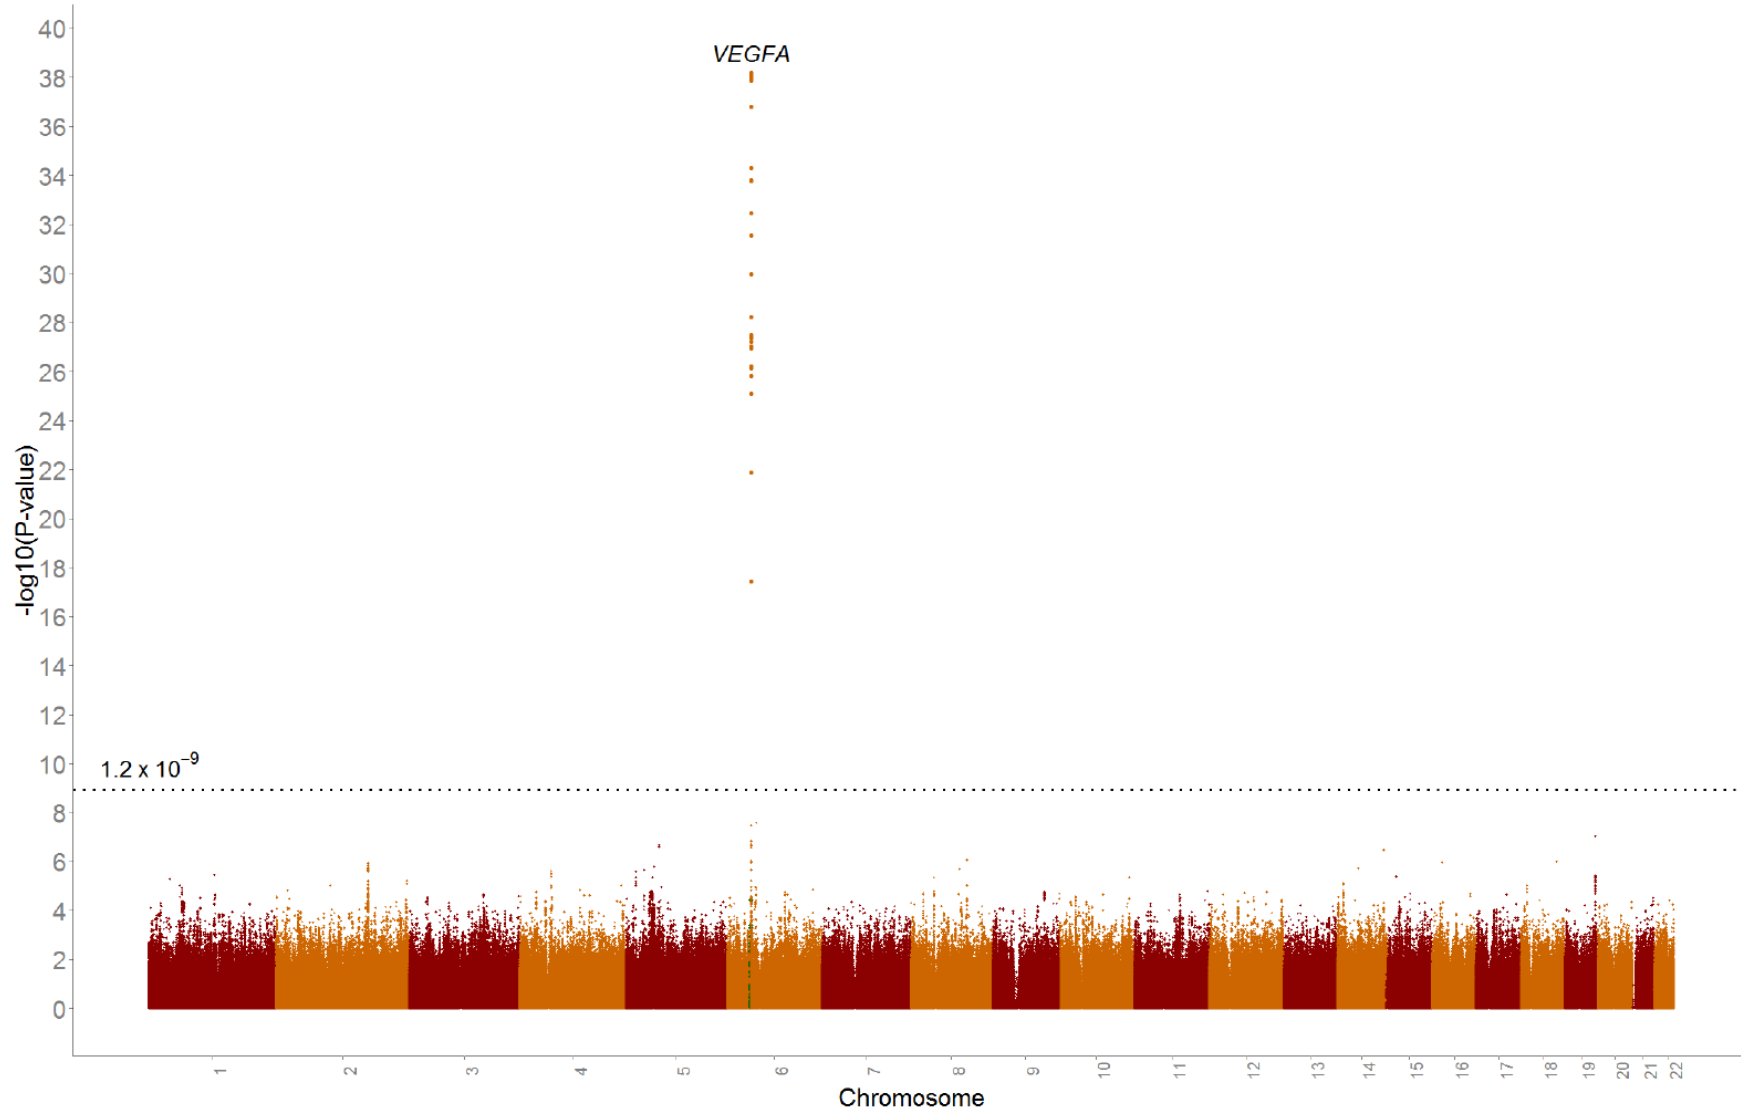

Manhattan plot for interleukin-7.

Figure S17

# Interleukin-8

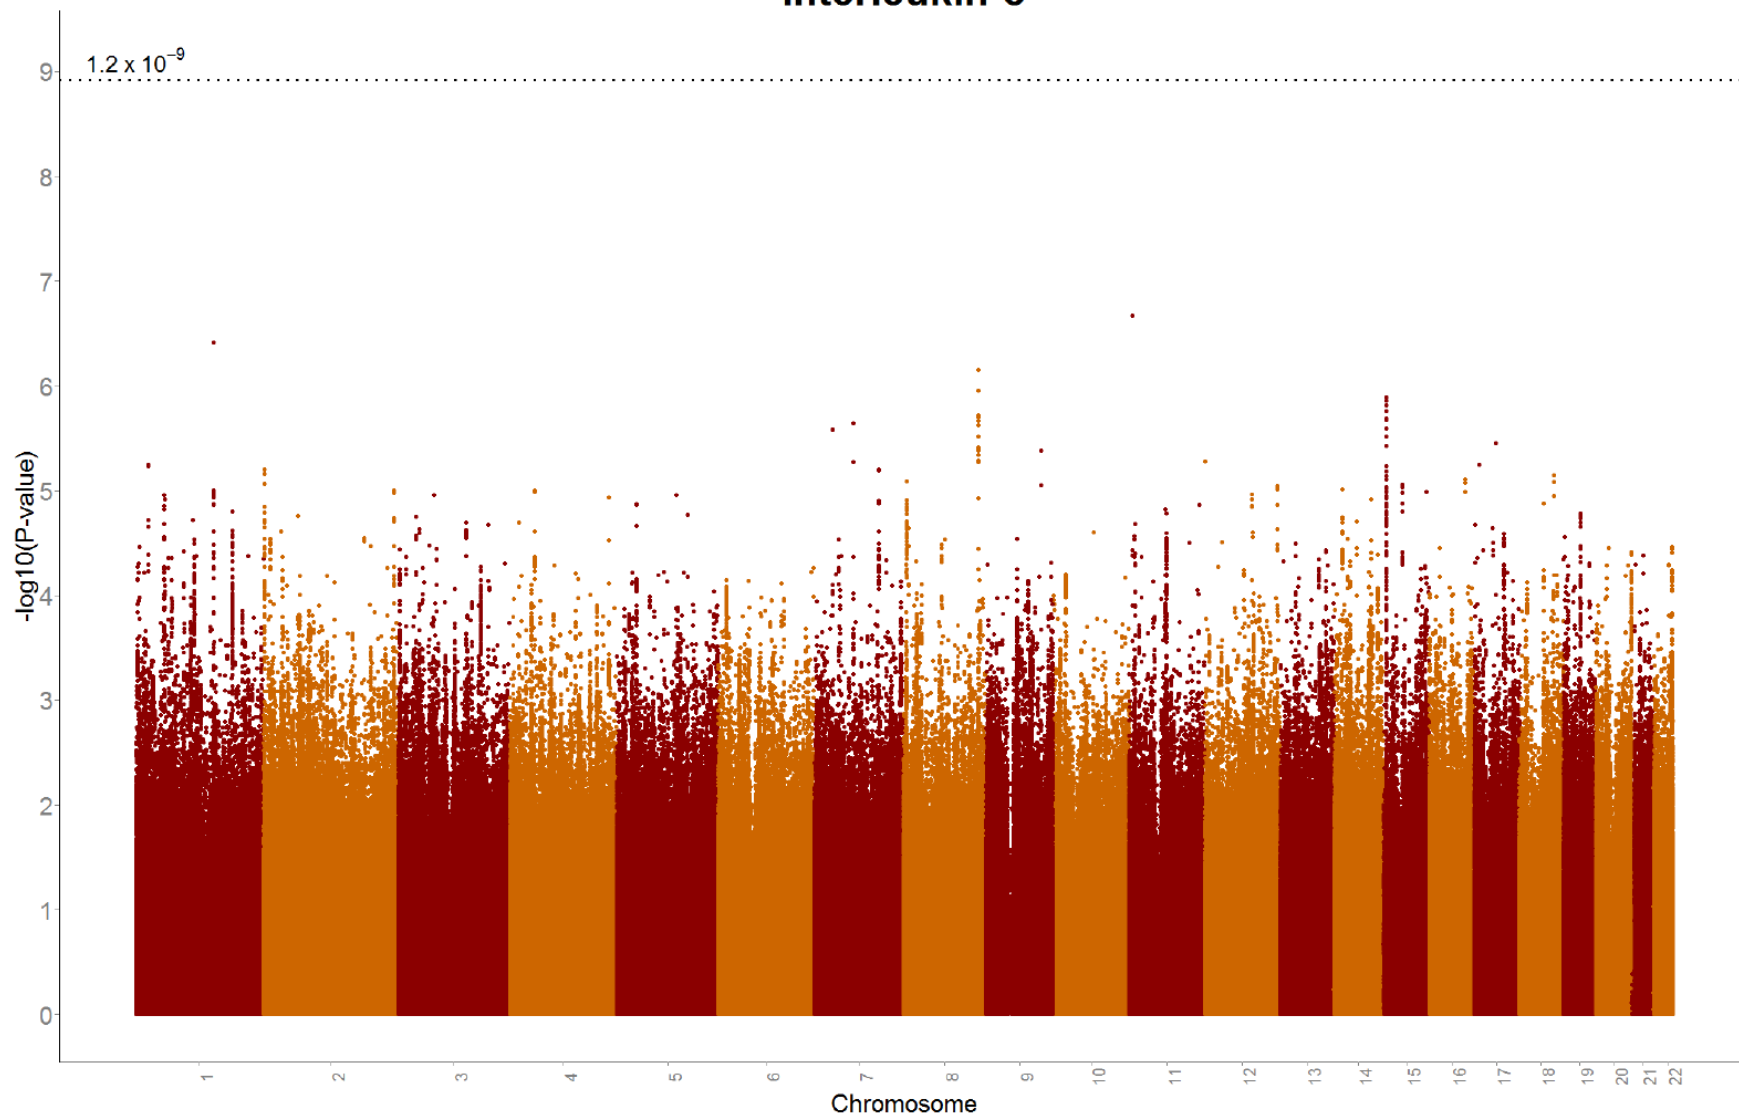

Manhattan plot for interleukin-8.

**Figure S18**

# Interleukin-9

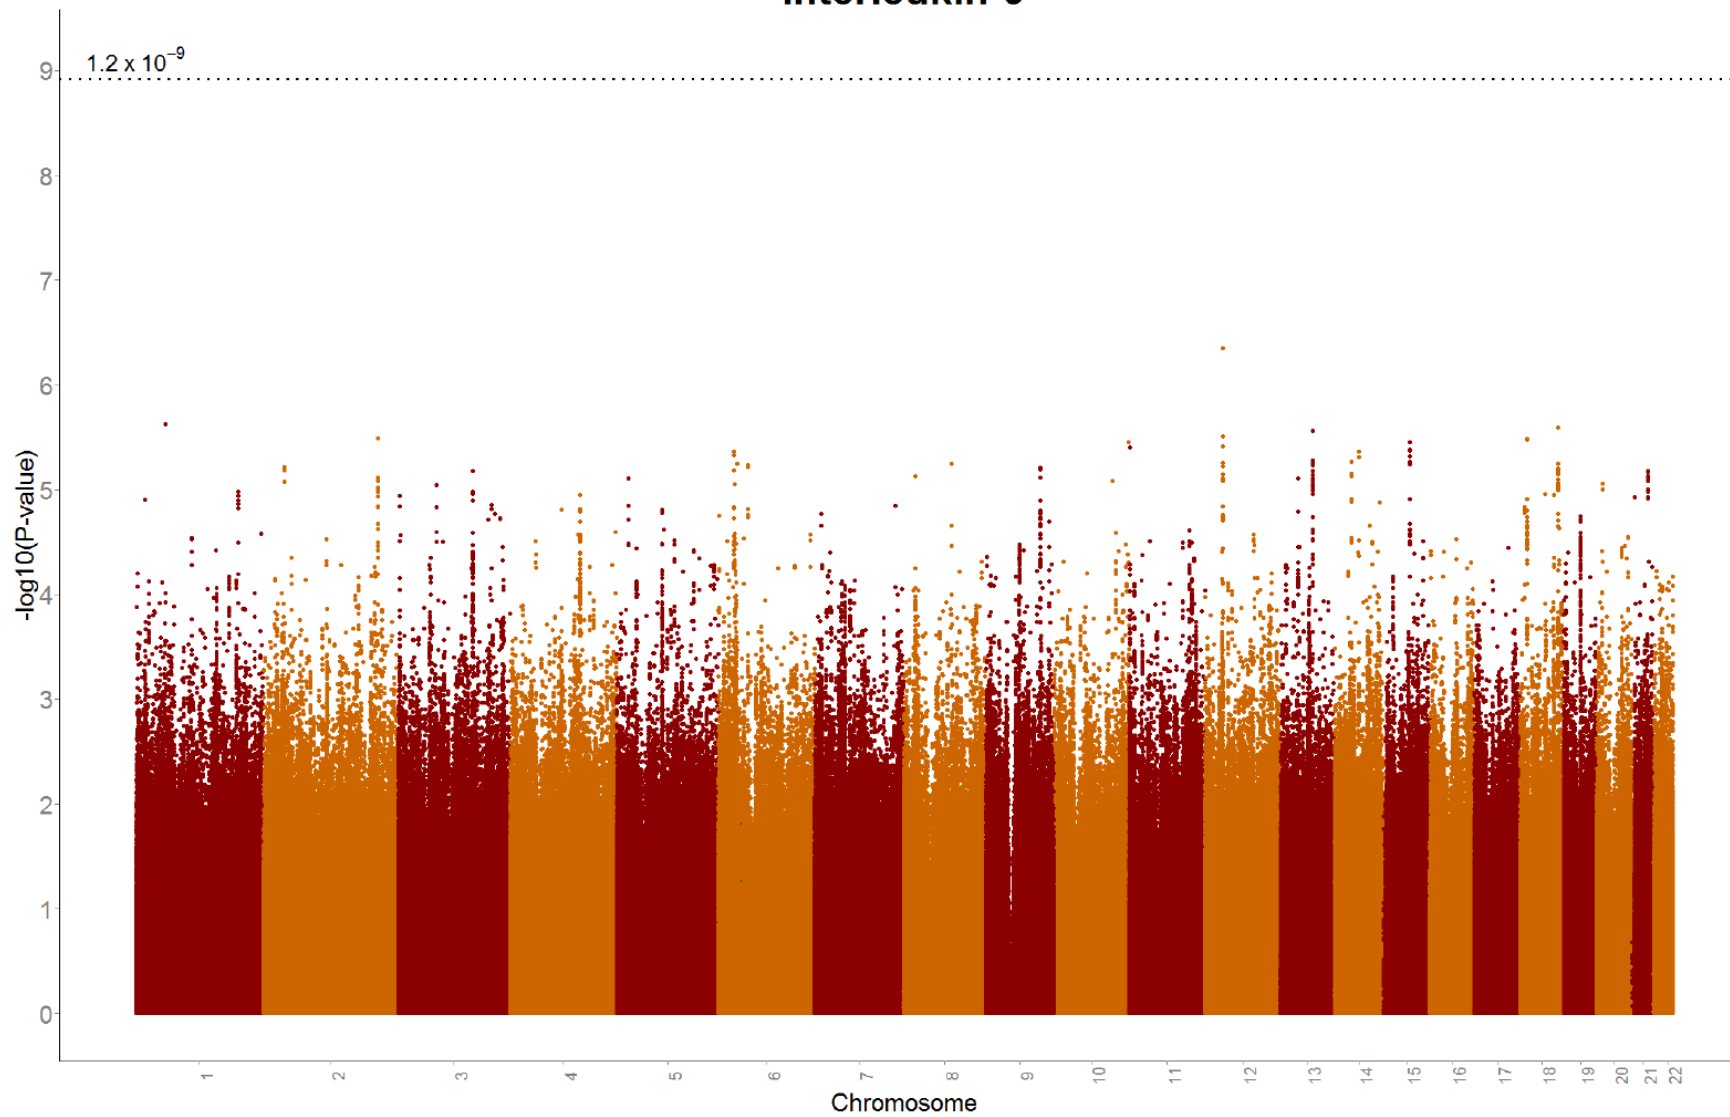

Manhattan plot for interleukin-9.

**Figure S19**

# Interleukin-10

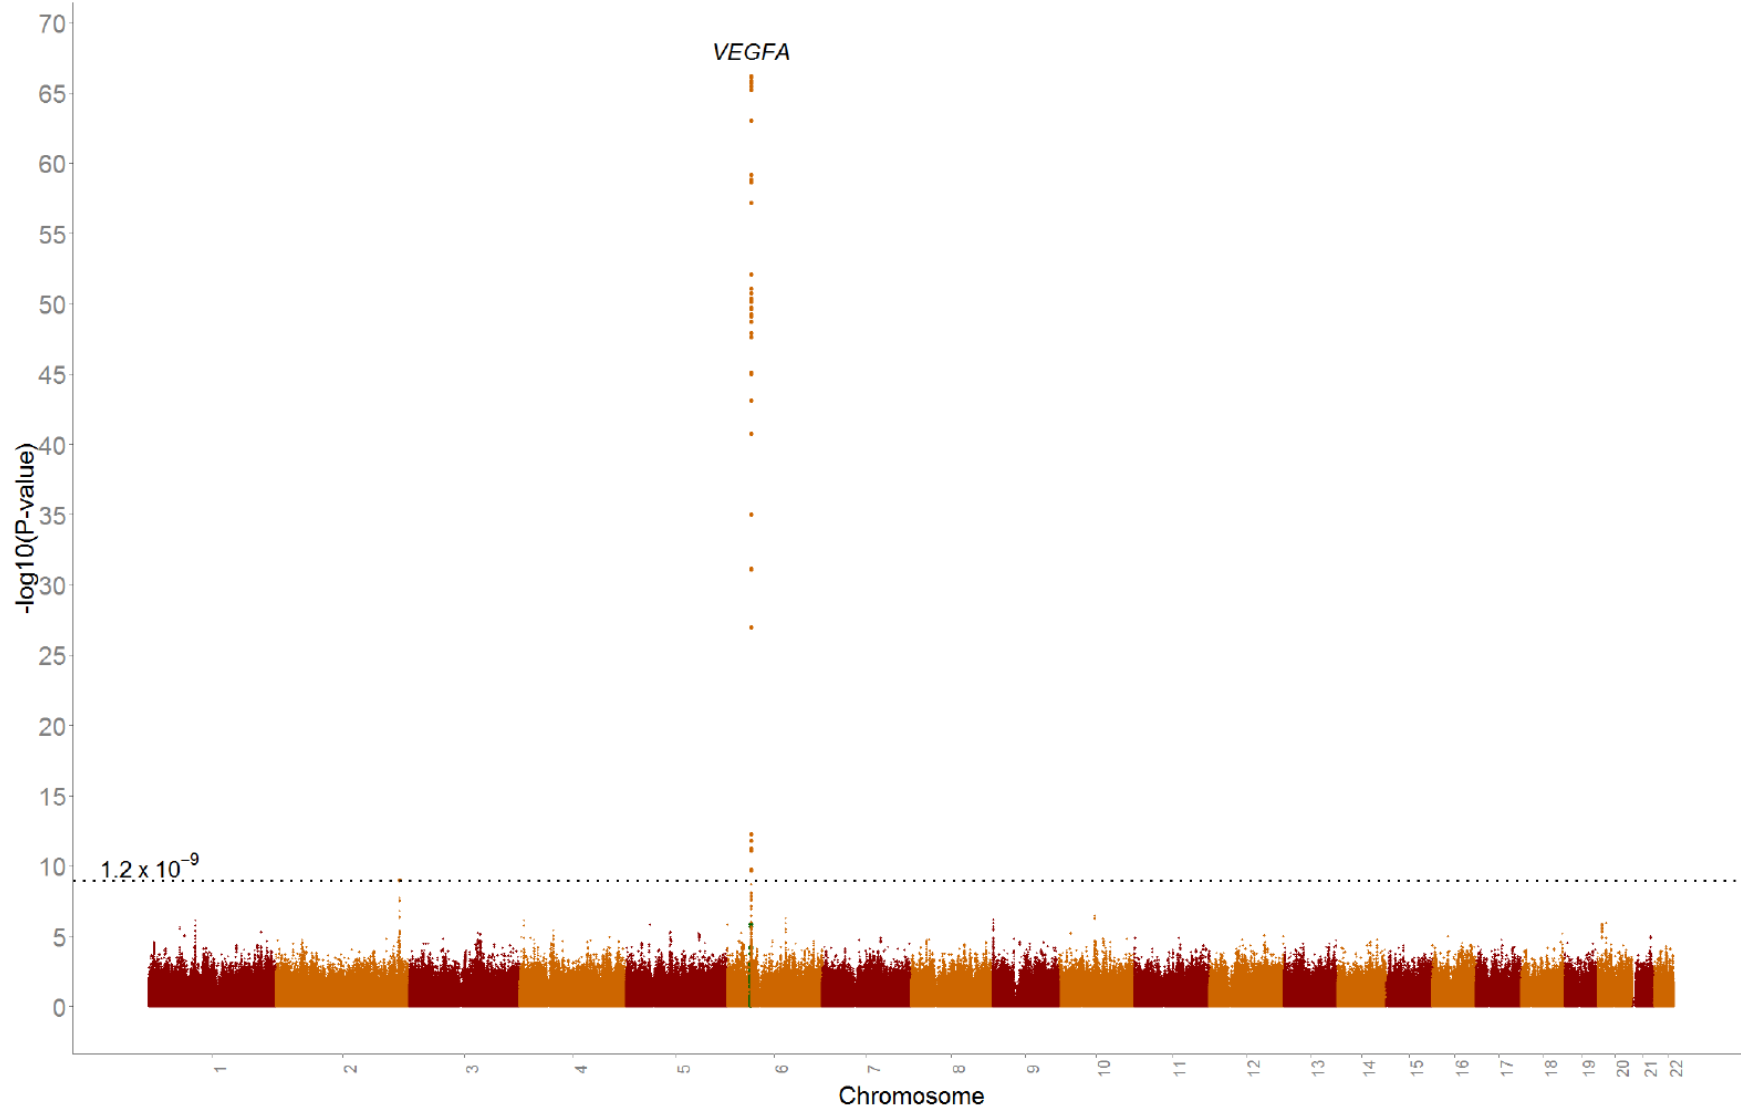

Manhattan plot for interleukin-10.

Figure S20

# Interleukin-12p70

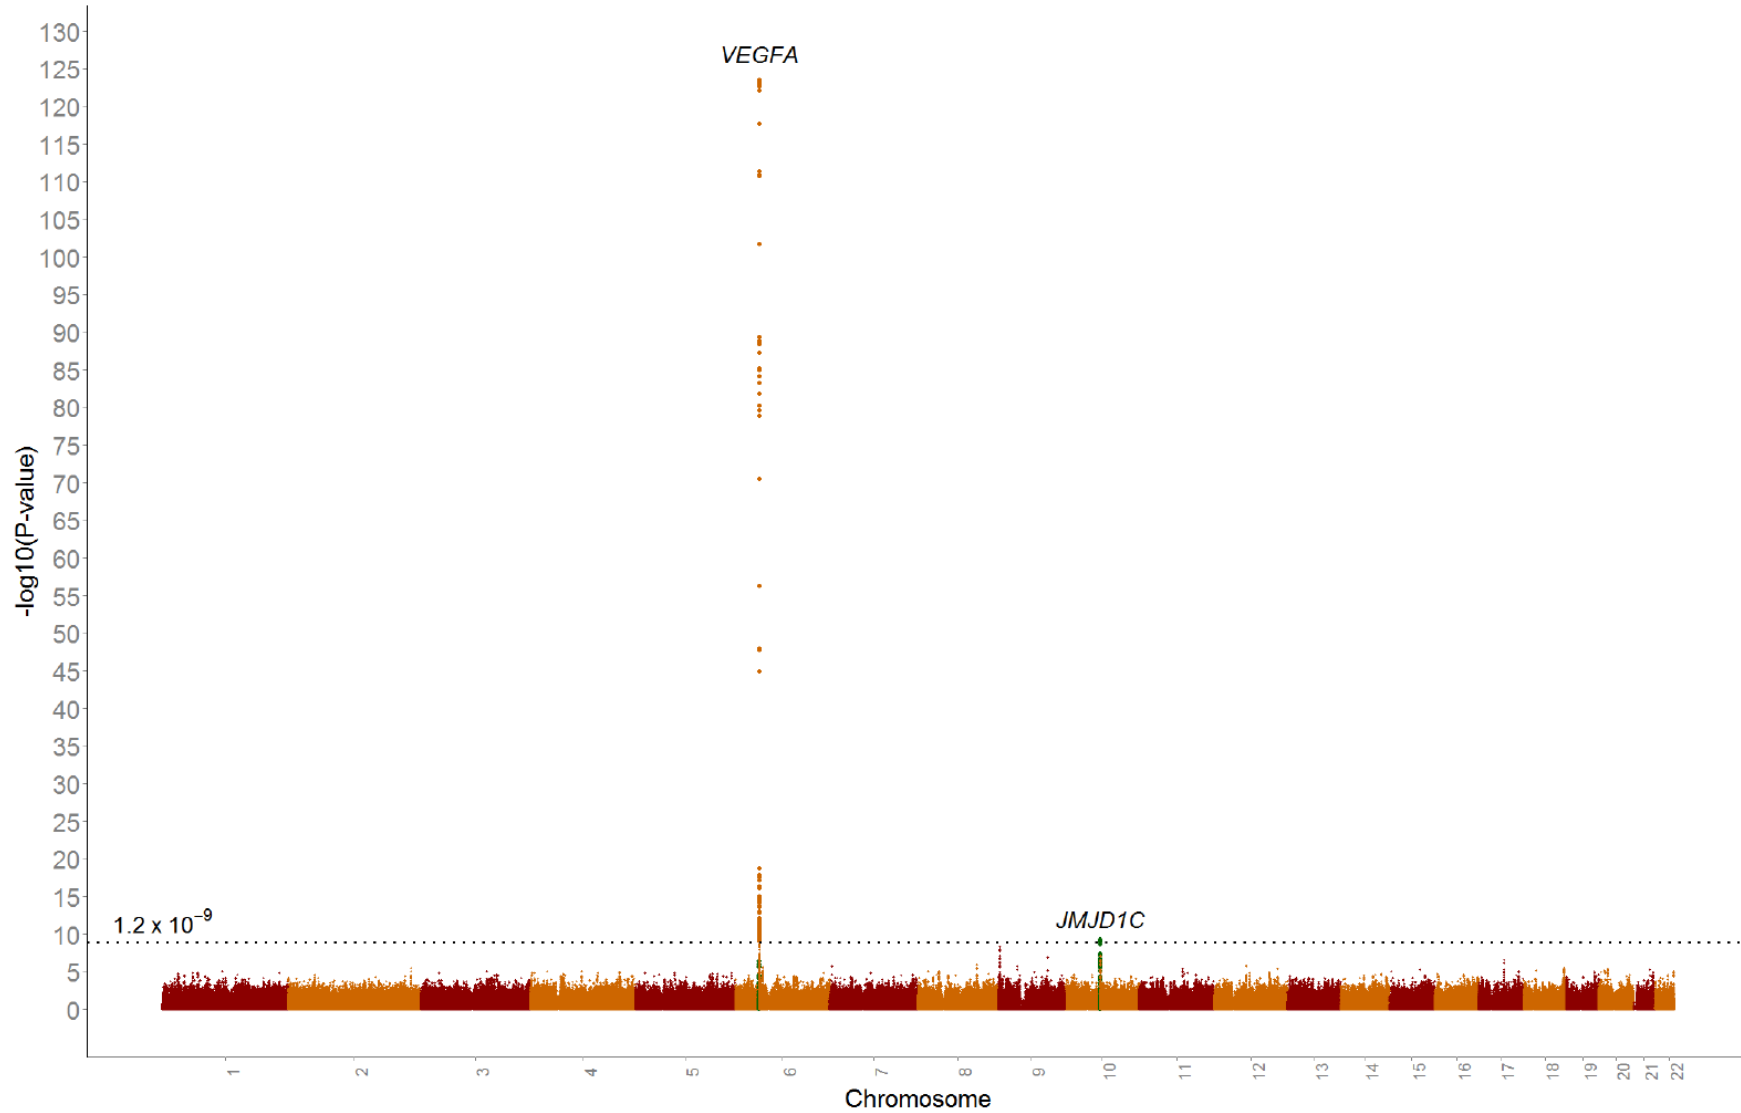

Manhattan plot for interleukin-12p70.

**Figure S21**

# Interleukin-13

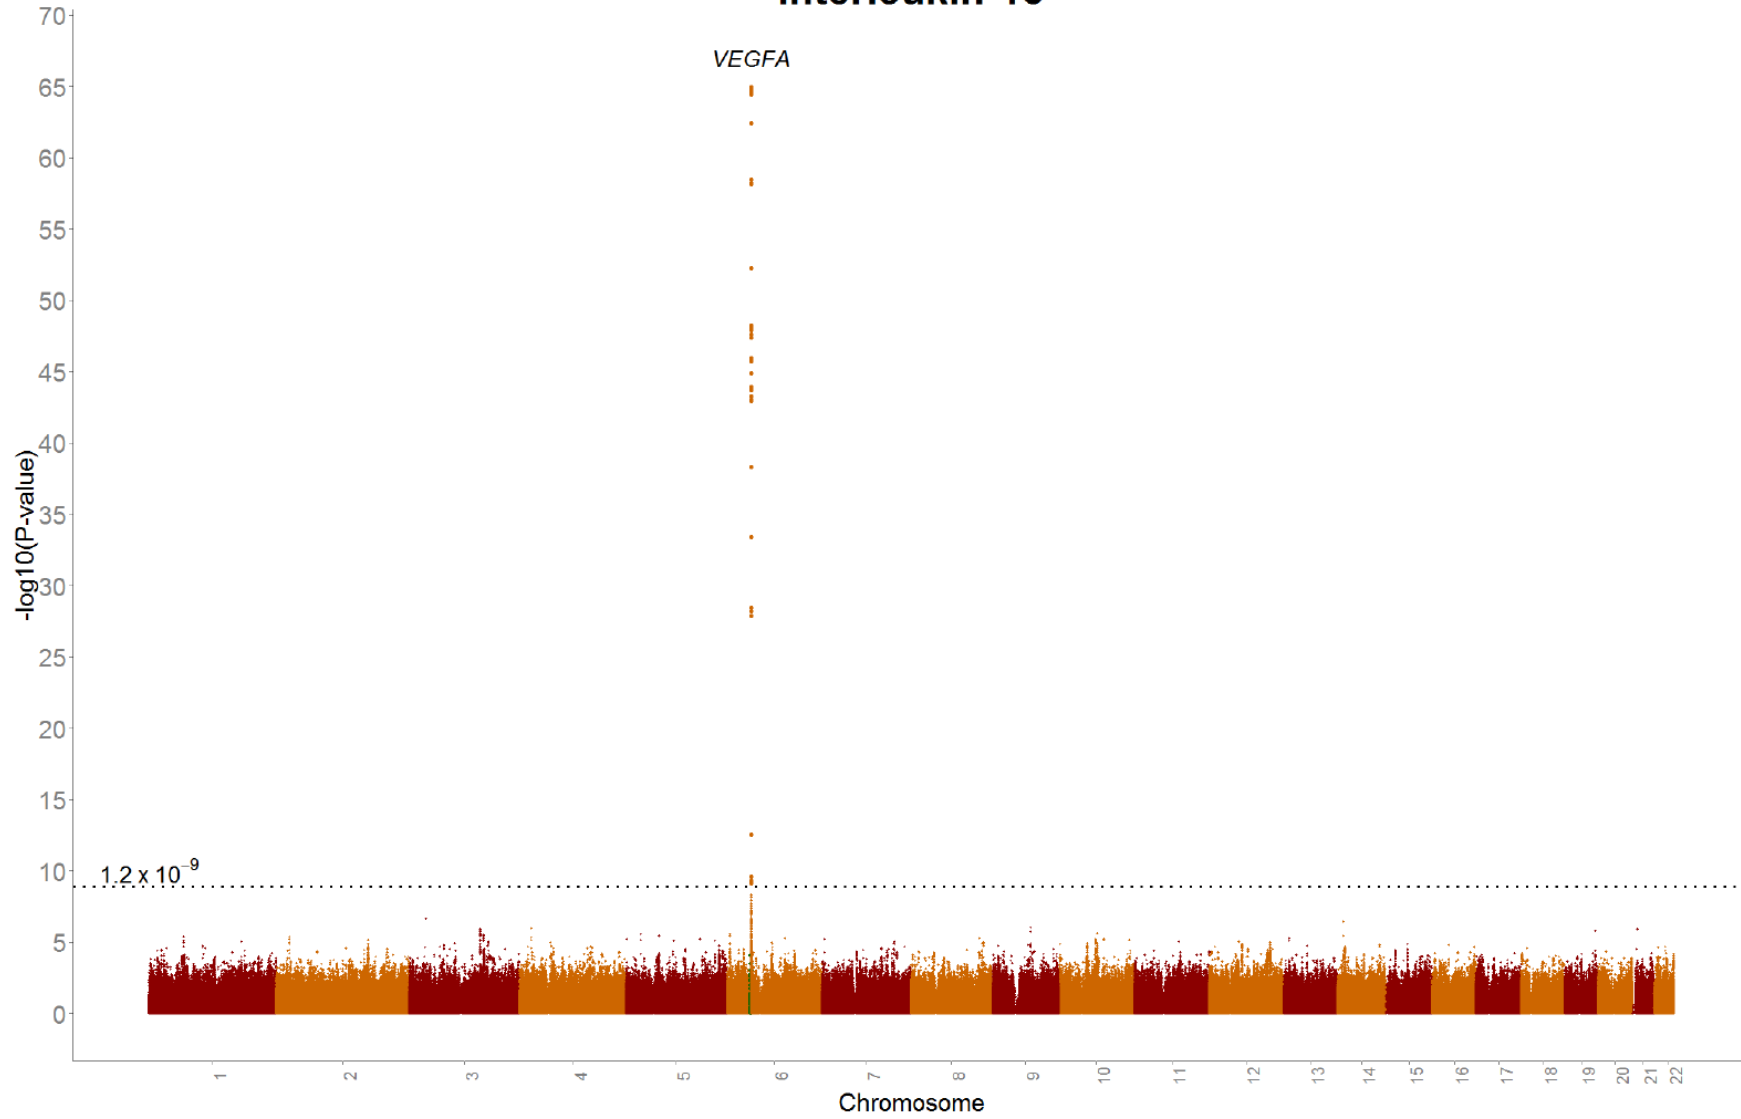

Manhattan plot for interleukin-13.

Figure S22

# Interleukin-16

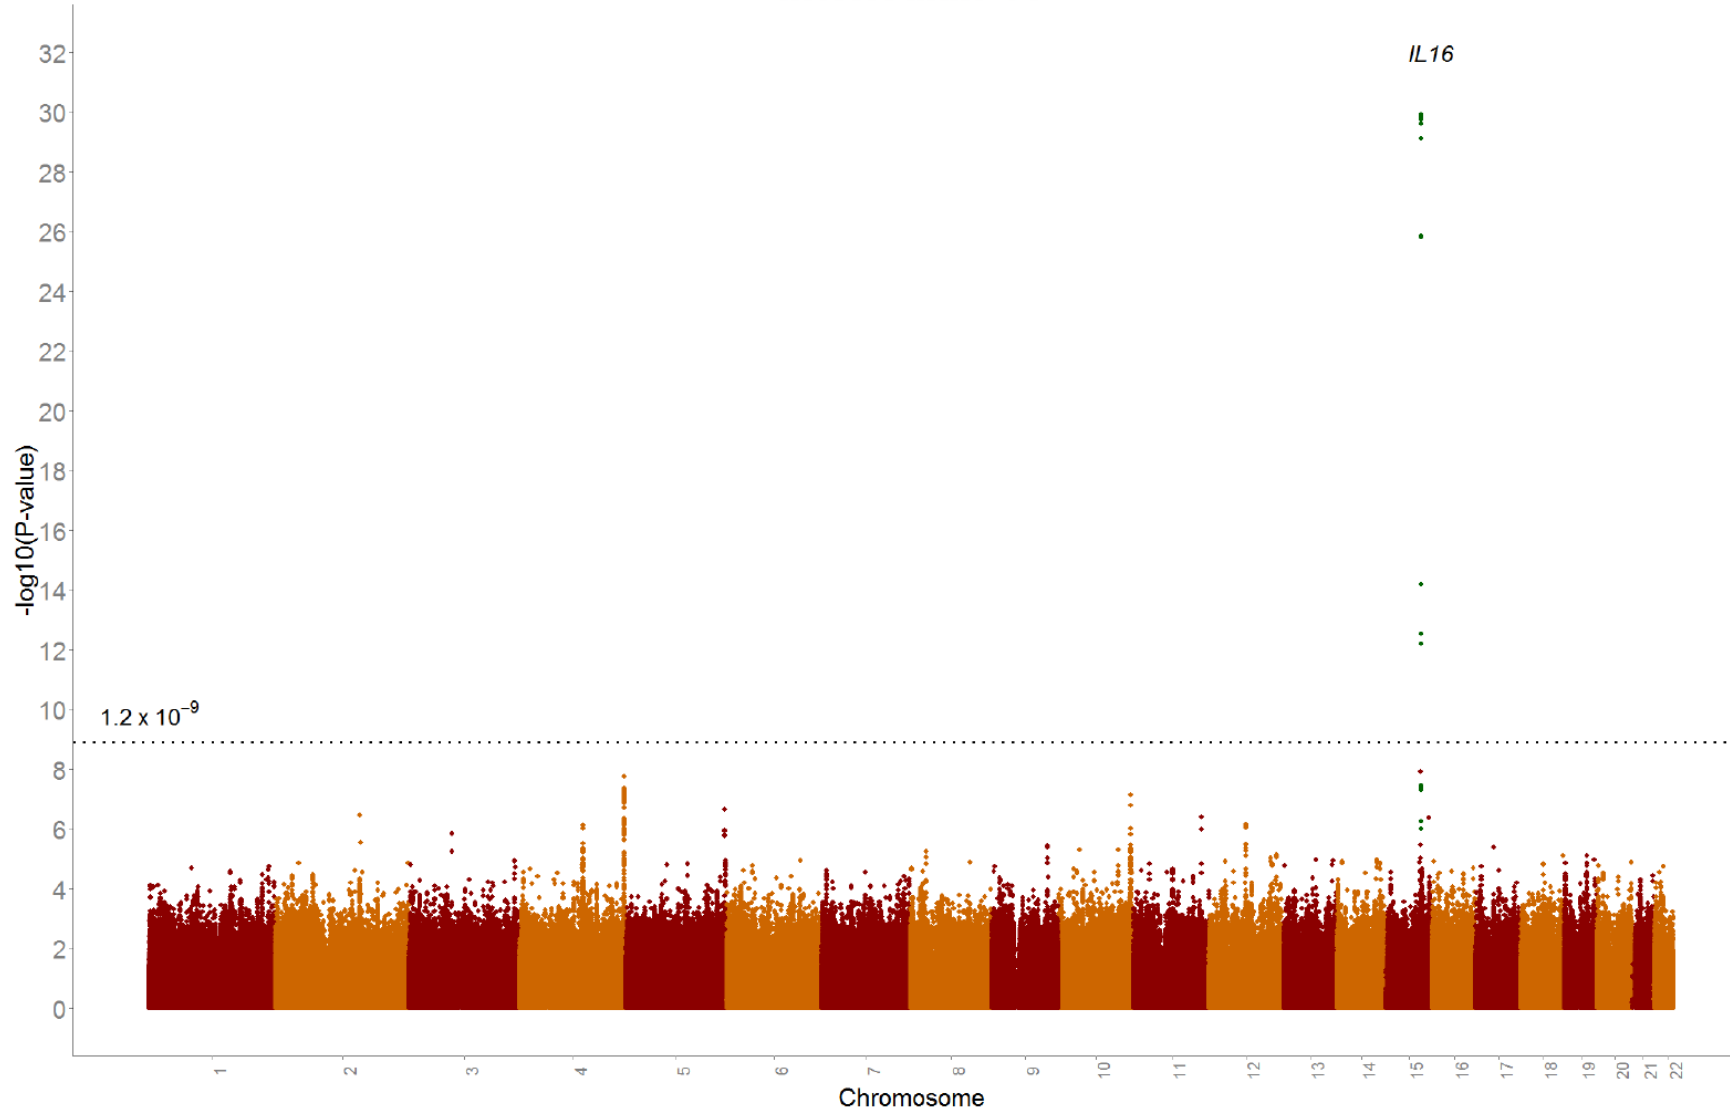

Figure S23

Manhattan plot for interleukin-16.



# Interleukin-18

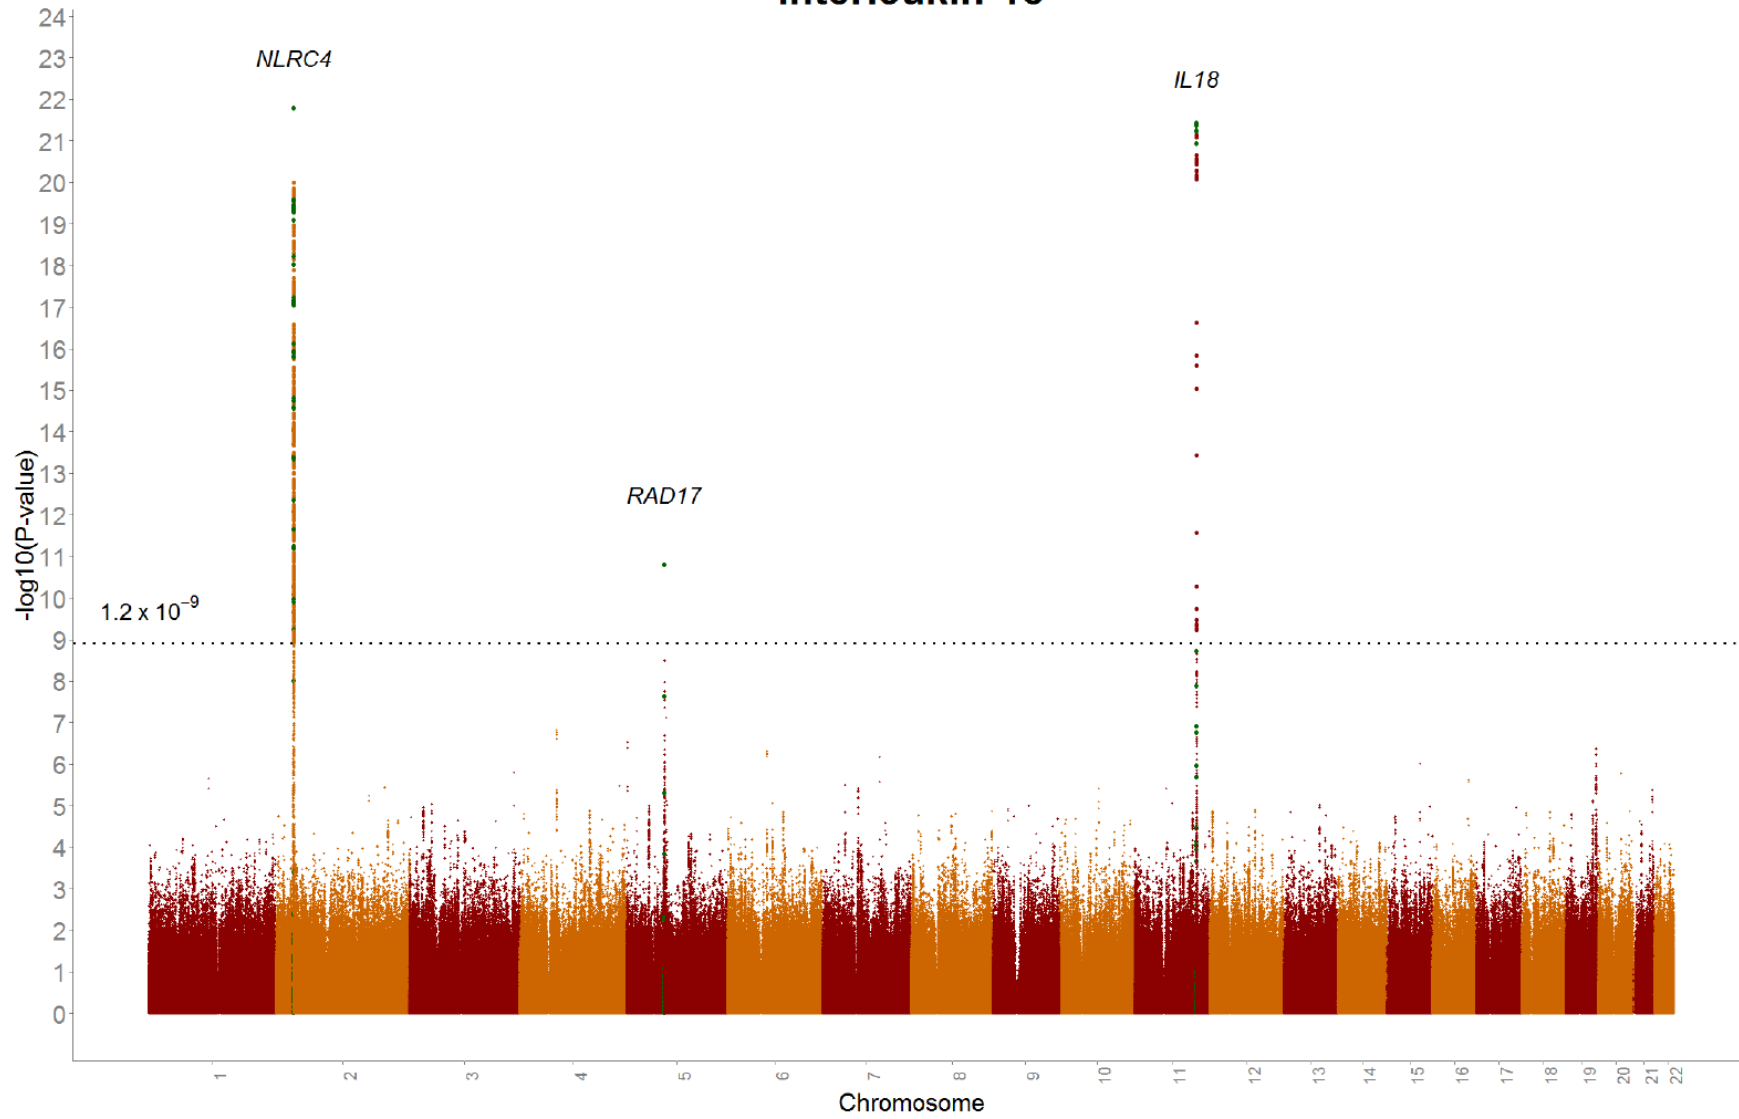

Manhattan plot for interleukin-18.

Figure S24

# Interleukin-17

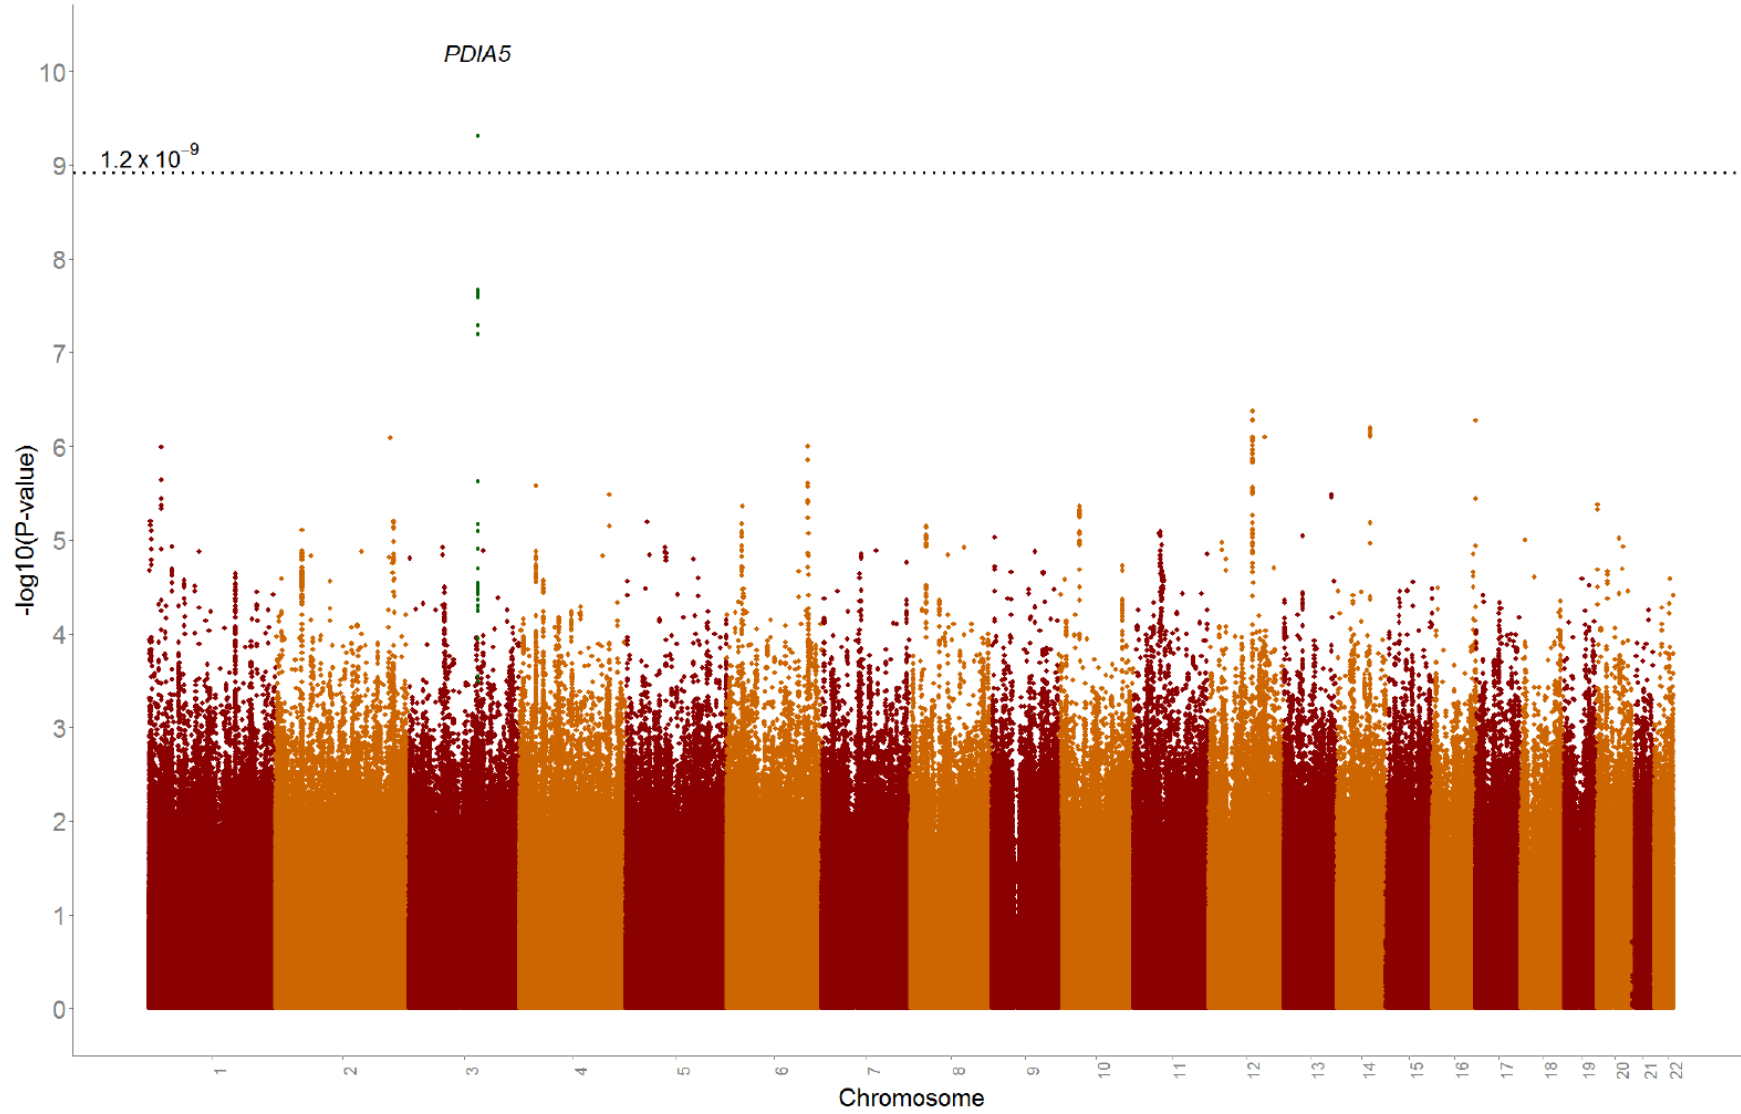

Manhattan plot for interleukin-17.

Figure S25

# IP10

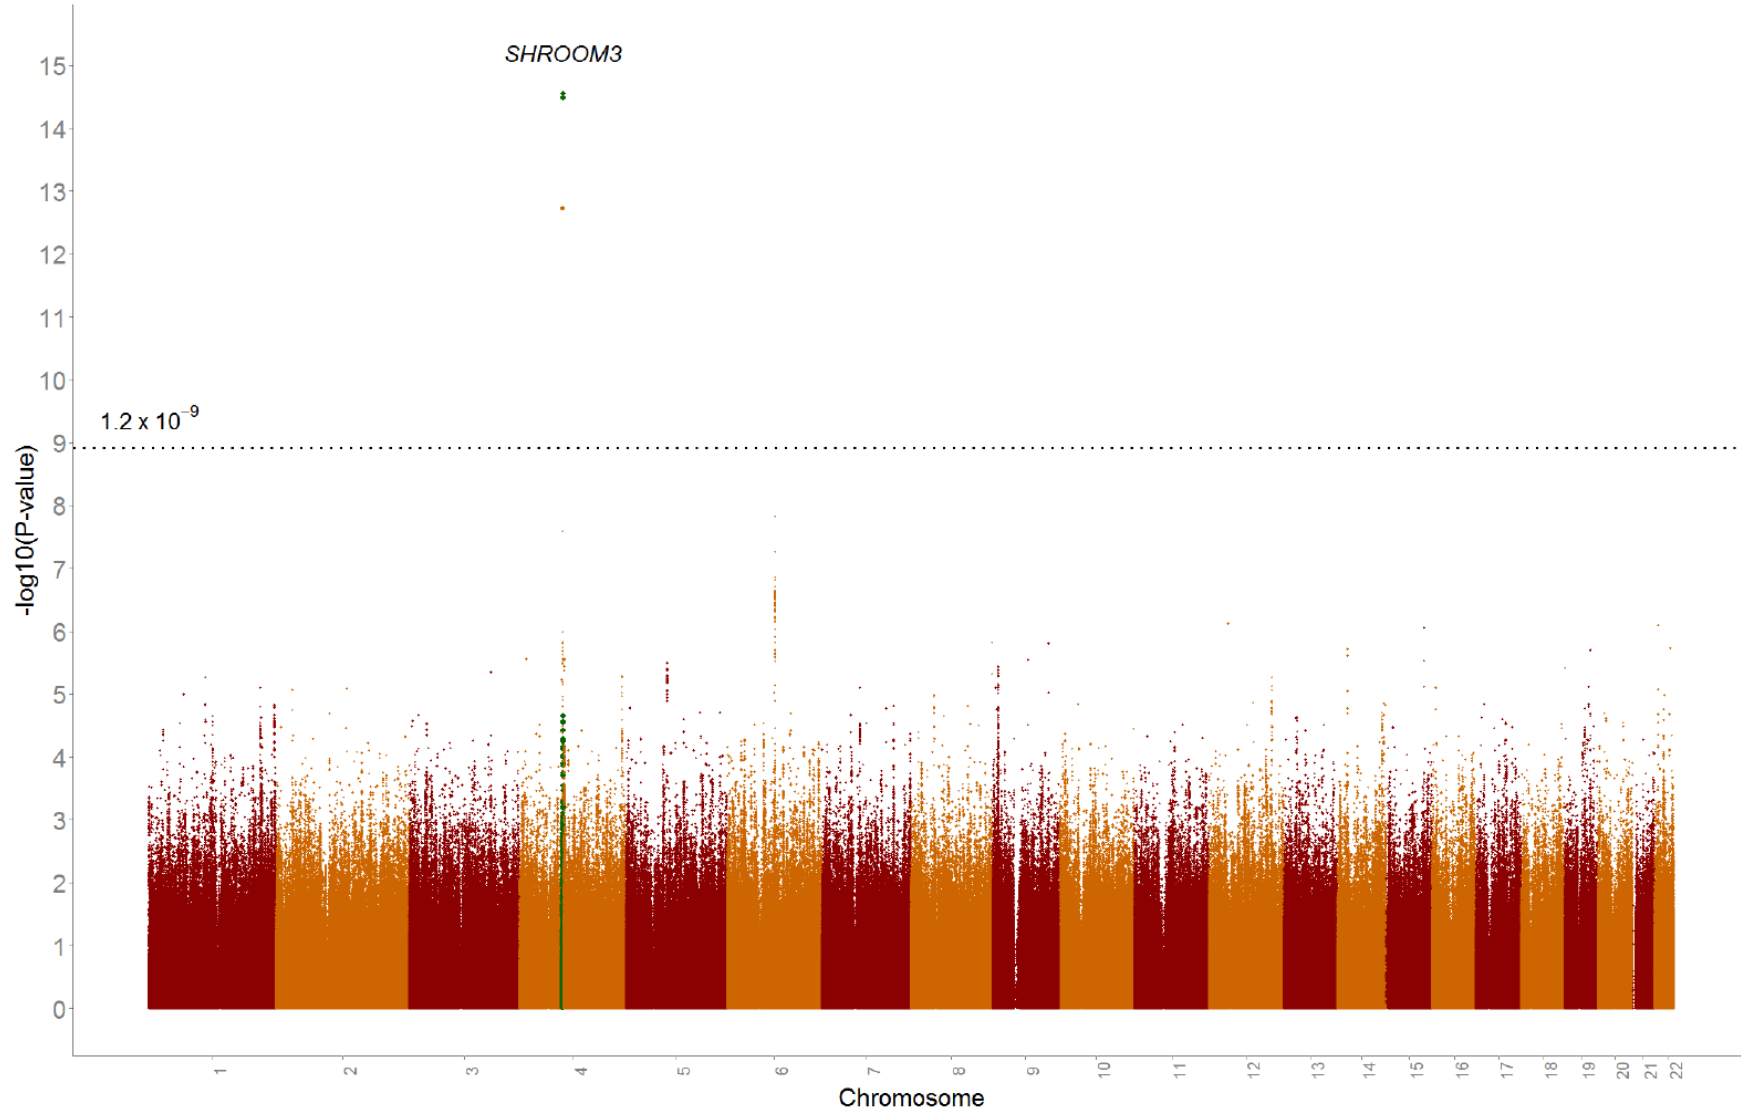

Manhattan plot for interferon gamma-induced protein 10 (CXCL10).

**Figure S26**

# MCP1

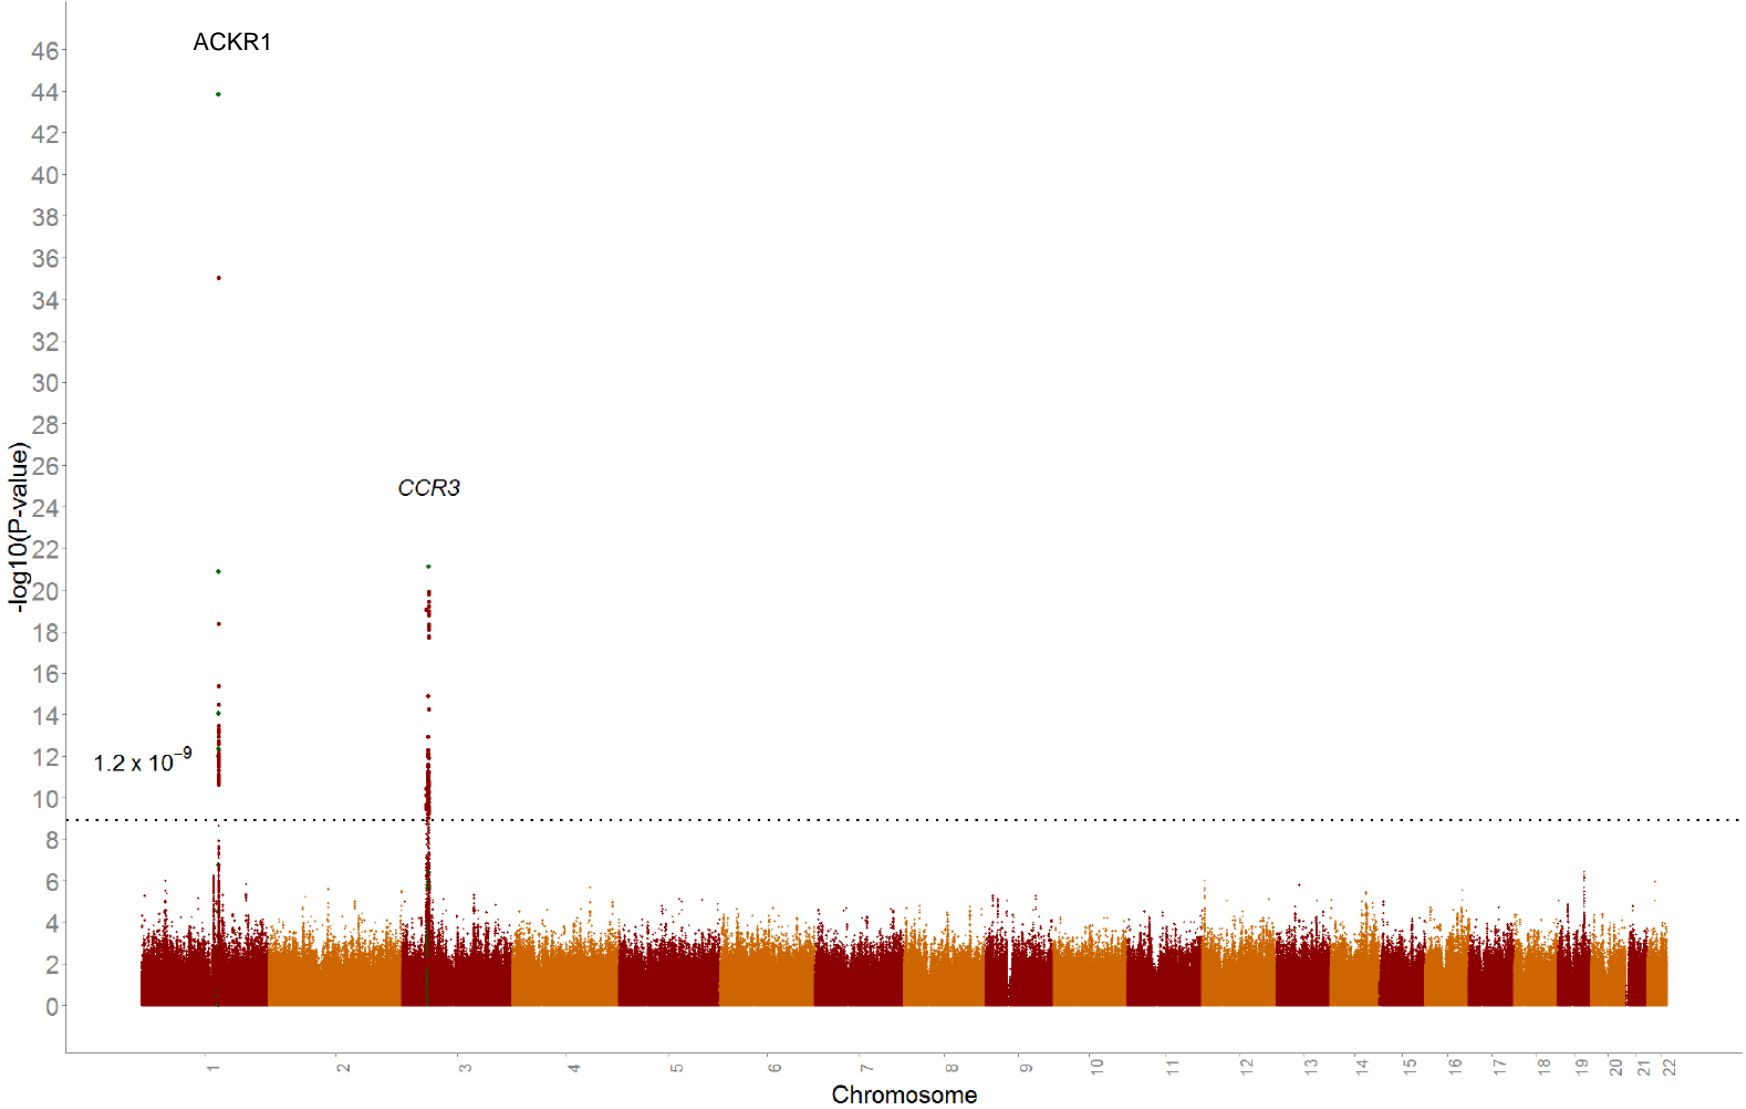

Manhattan plot for monocyte chemotactic protein-1 (CCL2).

Figure S27

# MCP3

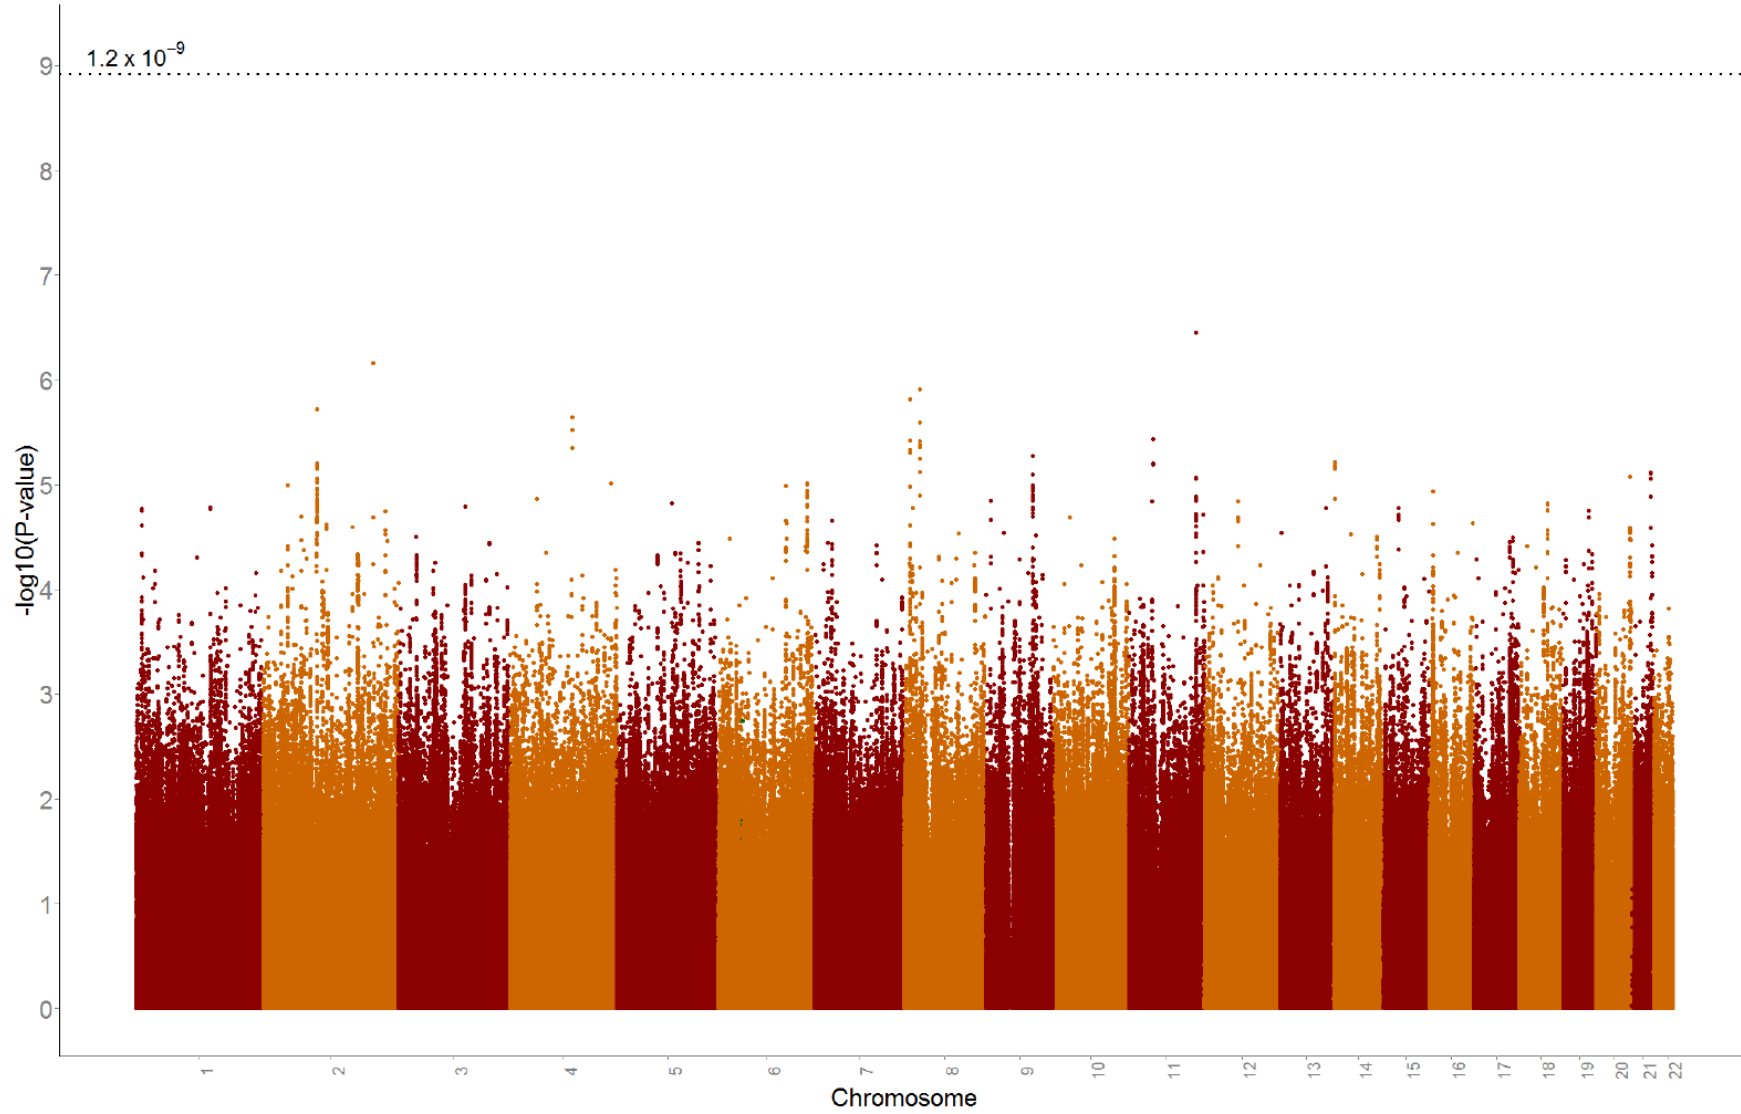

Manhattan plot for monocyte specific chemokine 3 (CCL7).

**Figure S28**

# MCSF

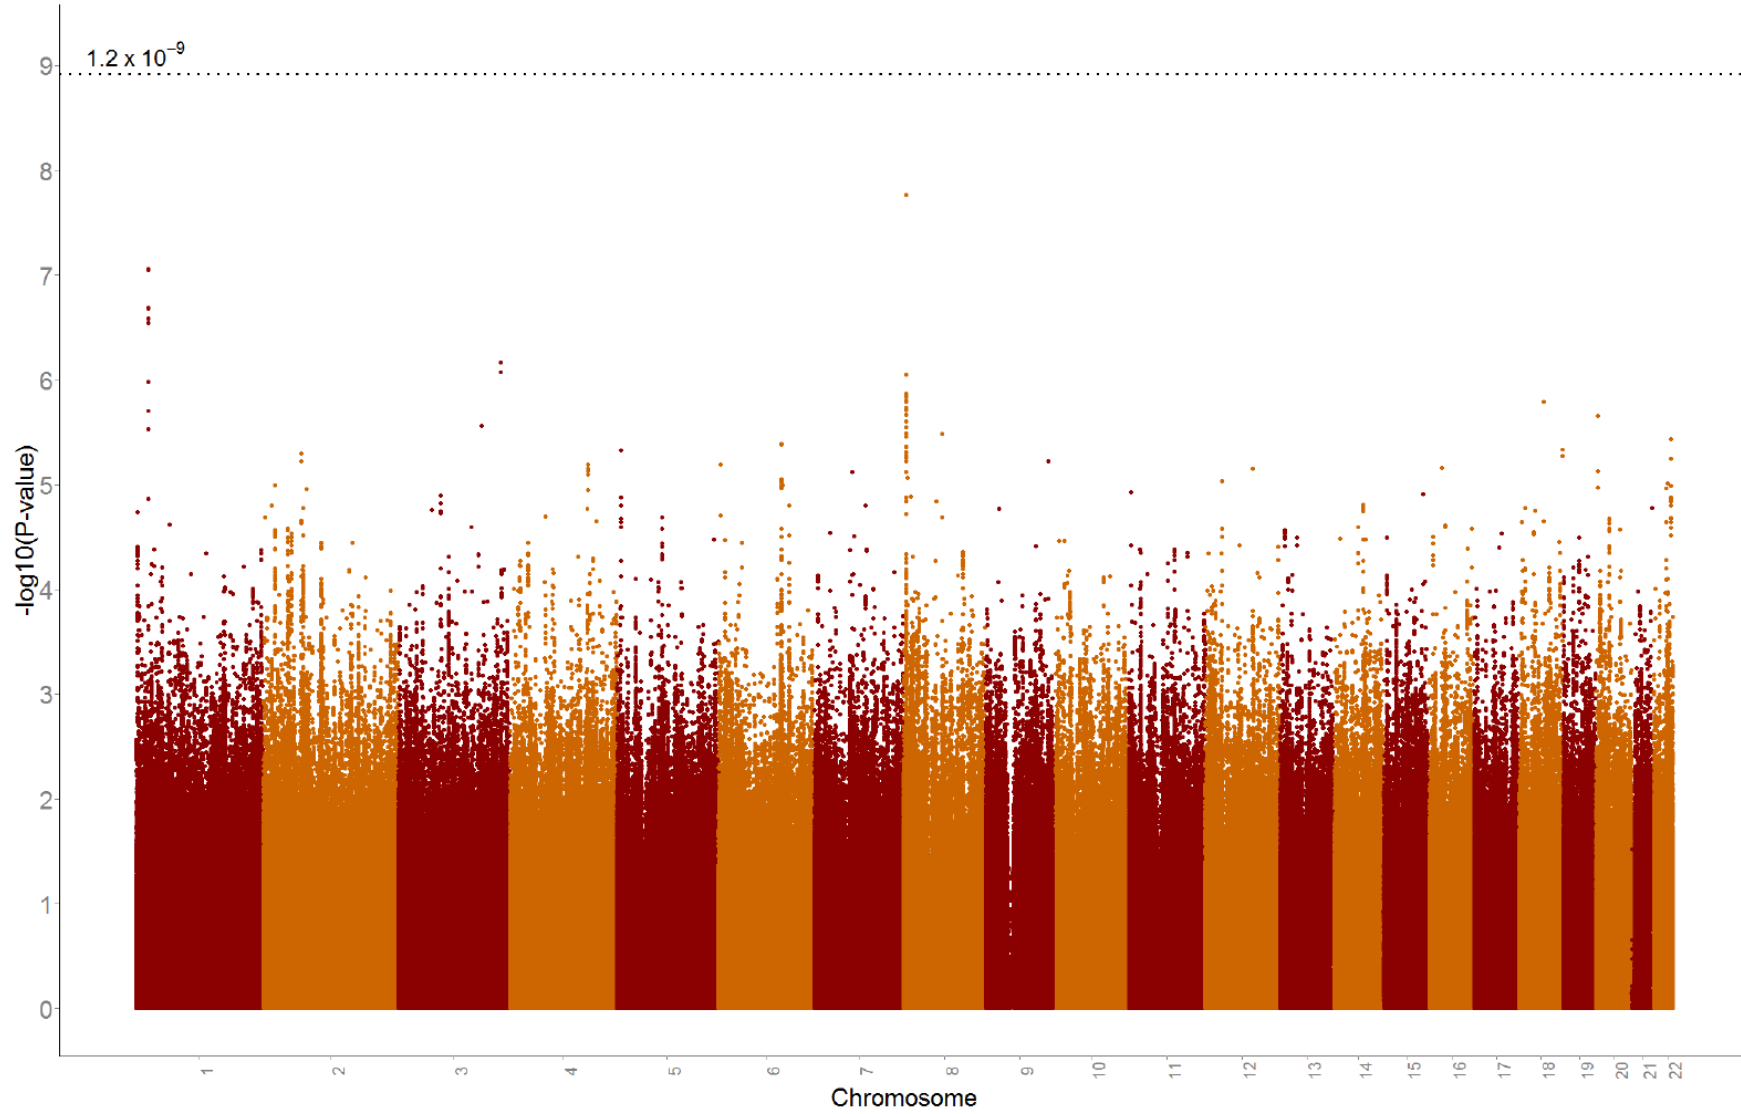

Manhattan plot for macrophage colony-stimulating factor (MCSF).

**Figure S29**

# MIF

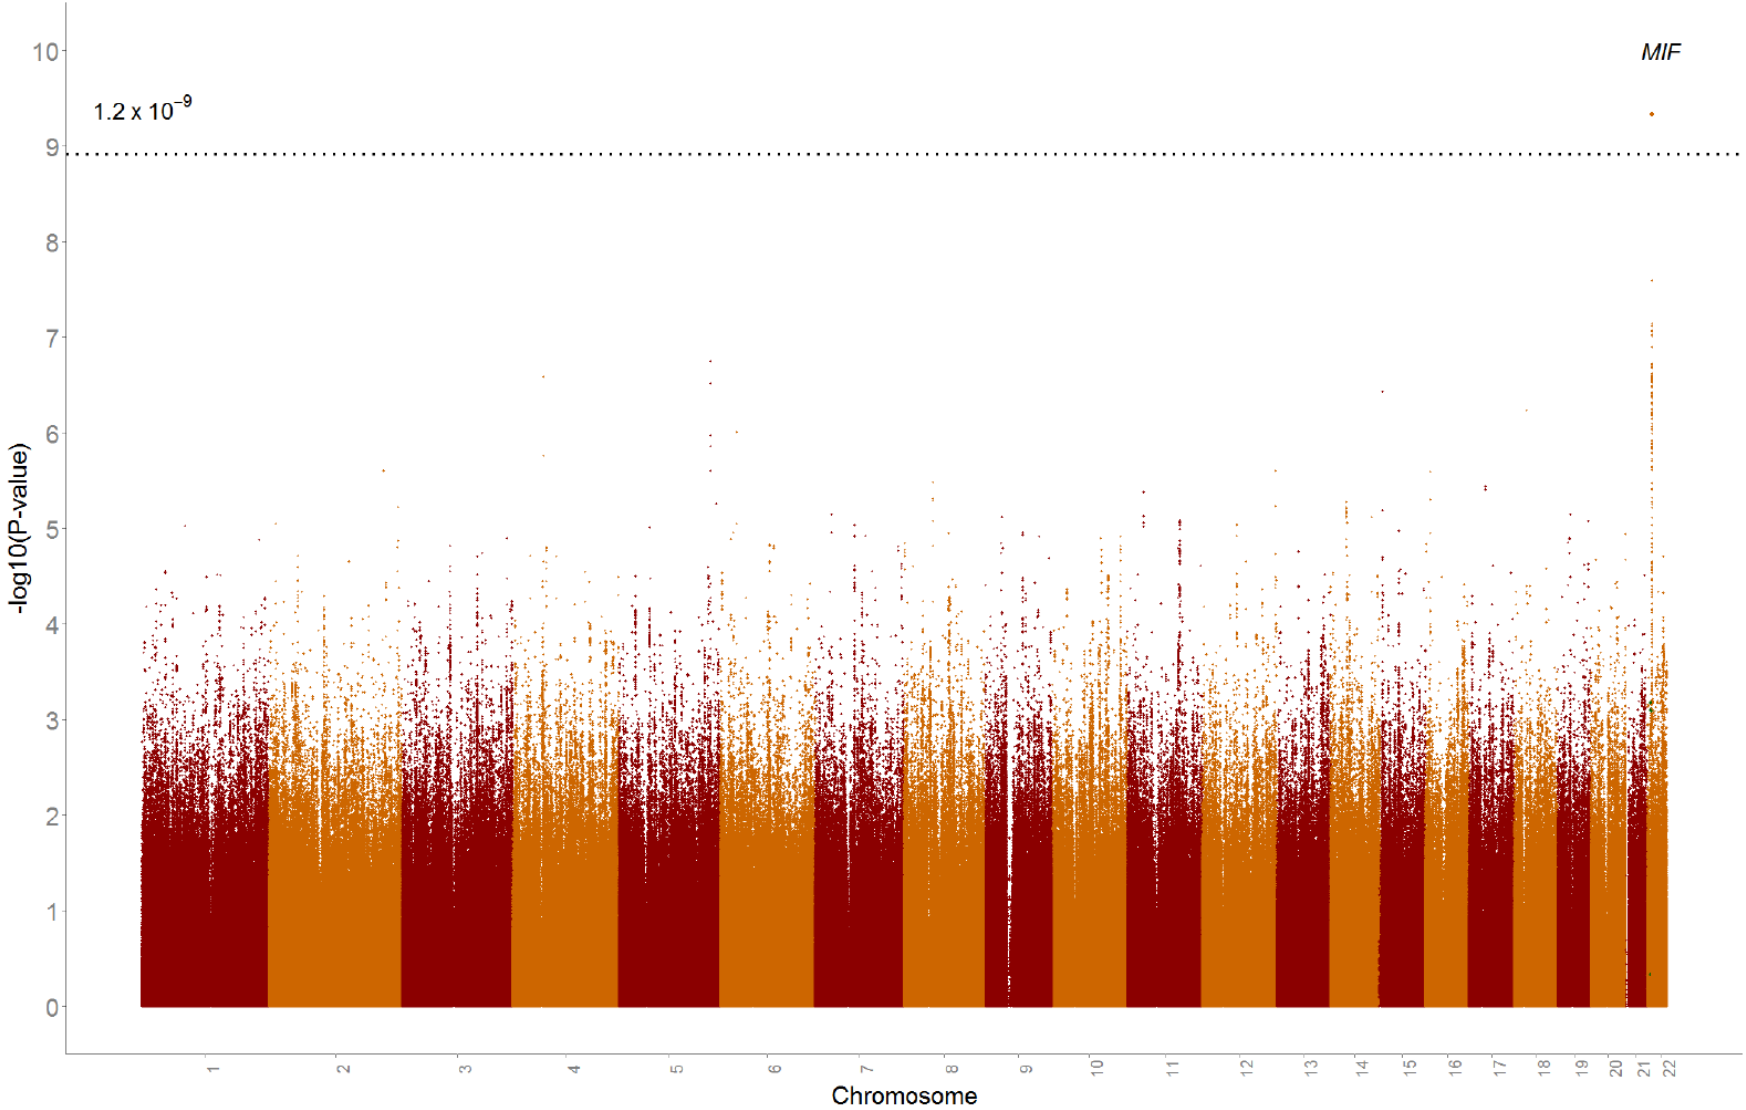

Manhattan plot for macrophage migration inhibitory factor (glycosylation-inhibiting factor).

**Figure S30**

# MIG

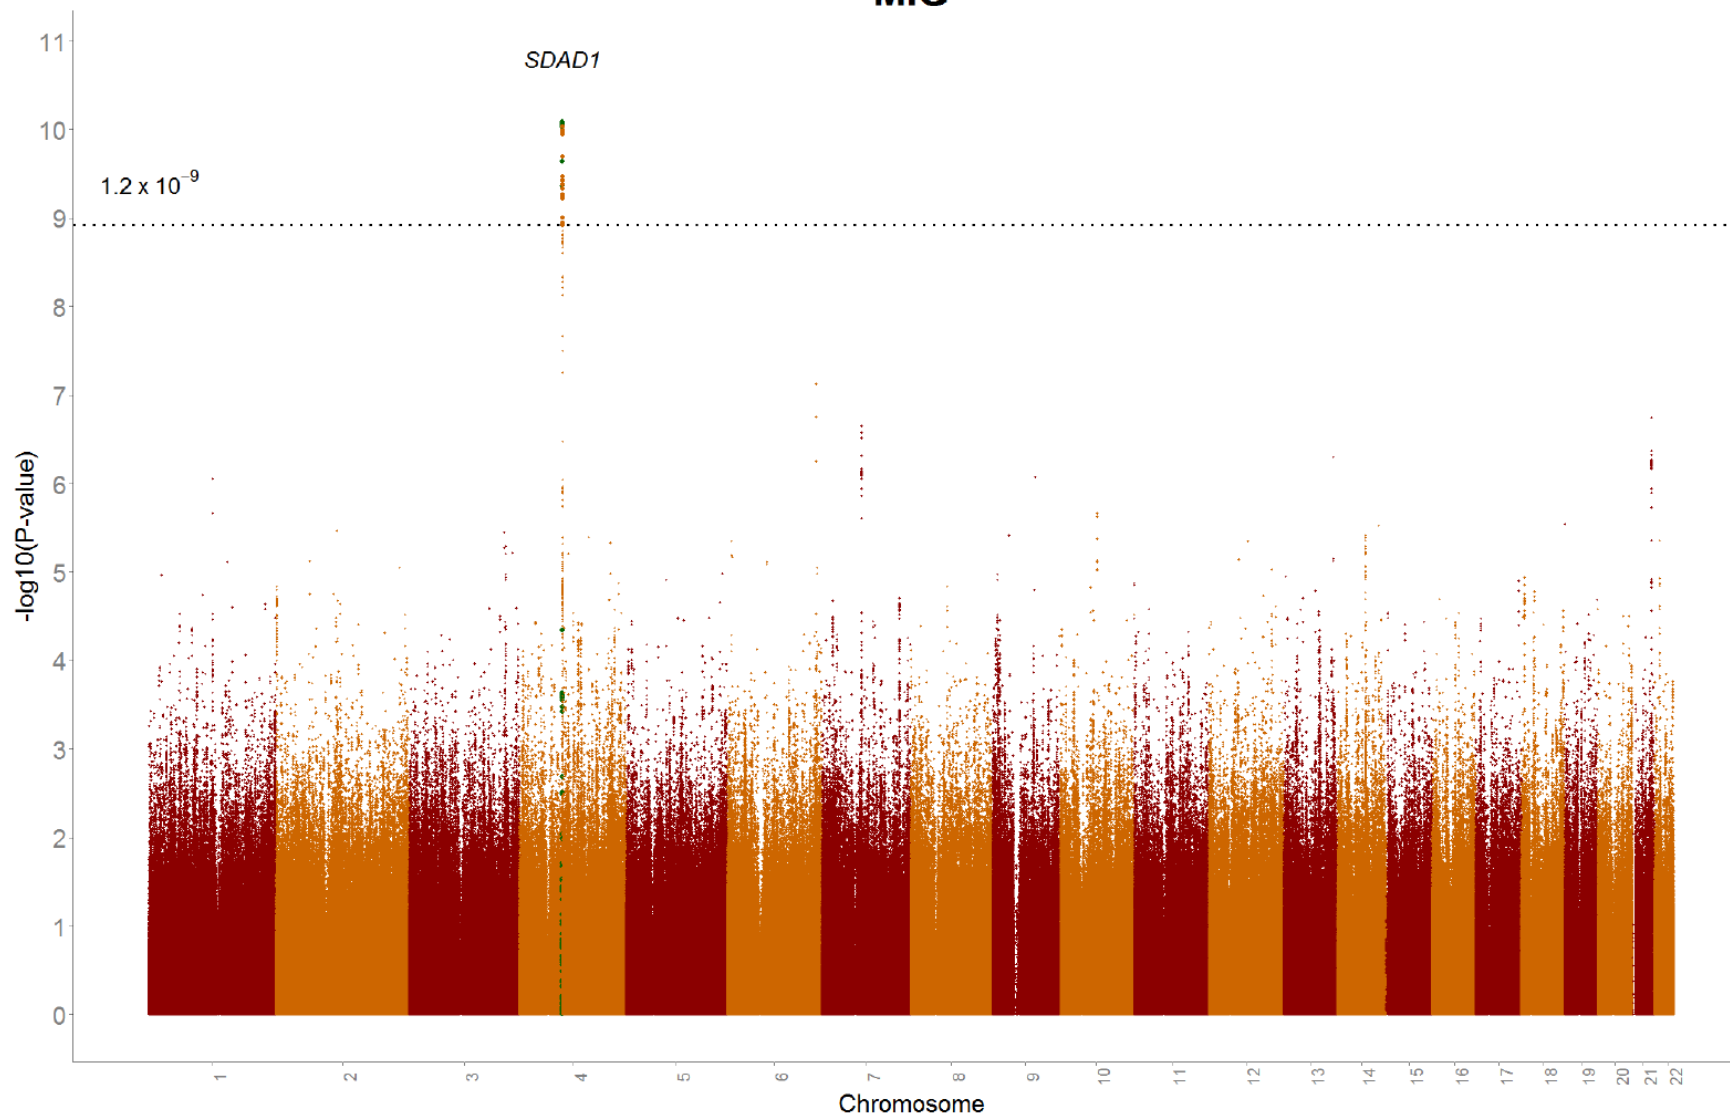

Manhattan plot for monokine induced by interferon-gamma (CXCL9).

**Figure S31**



# MIP1a

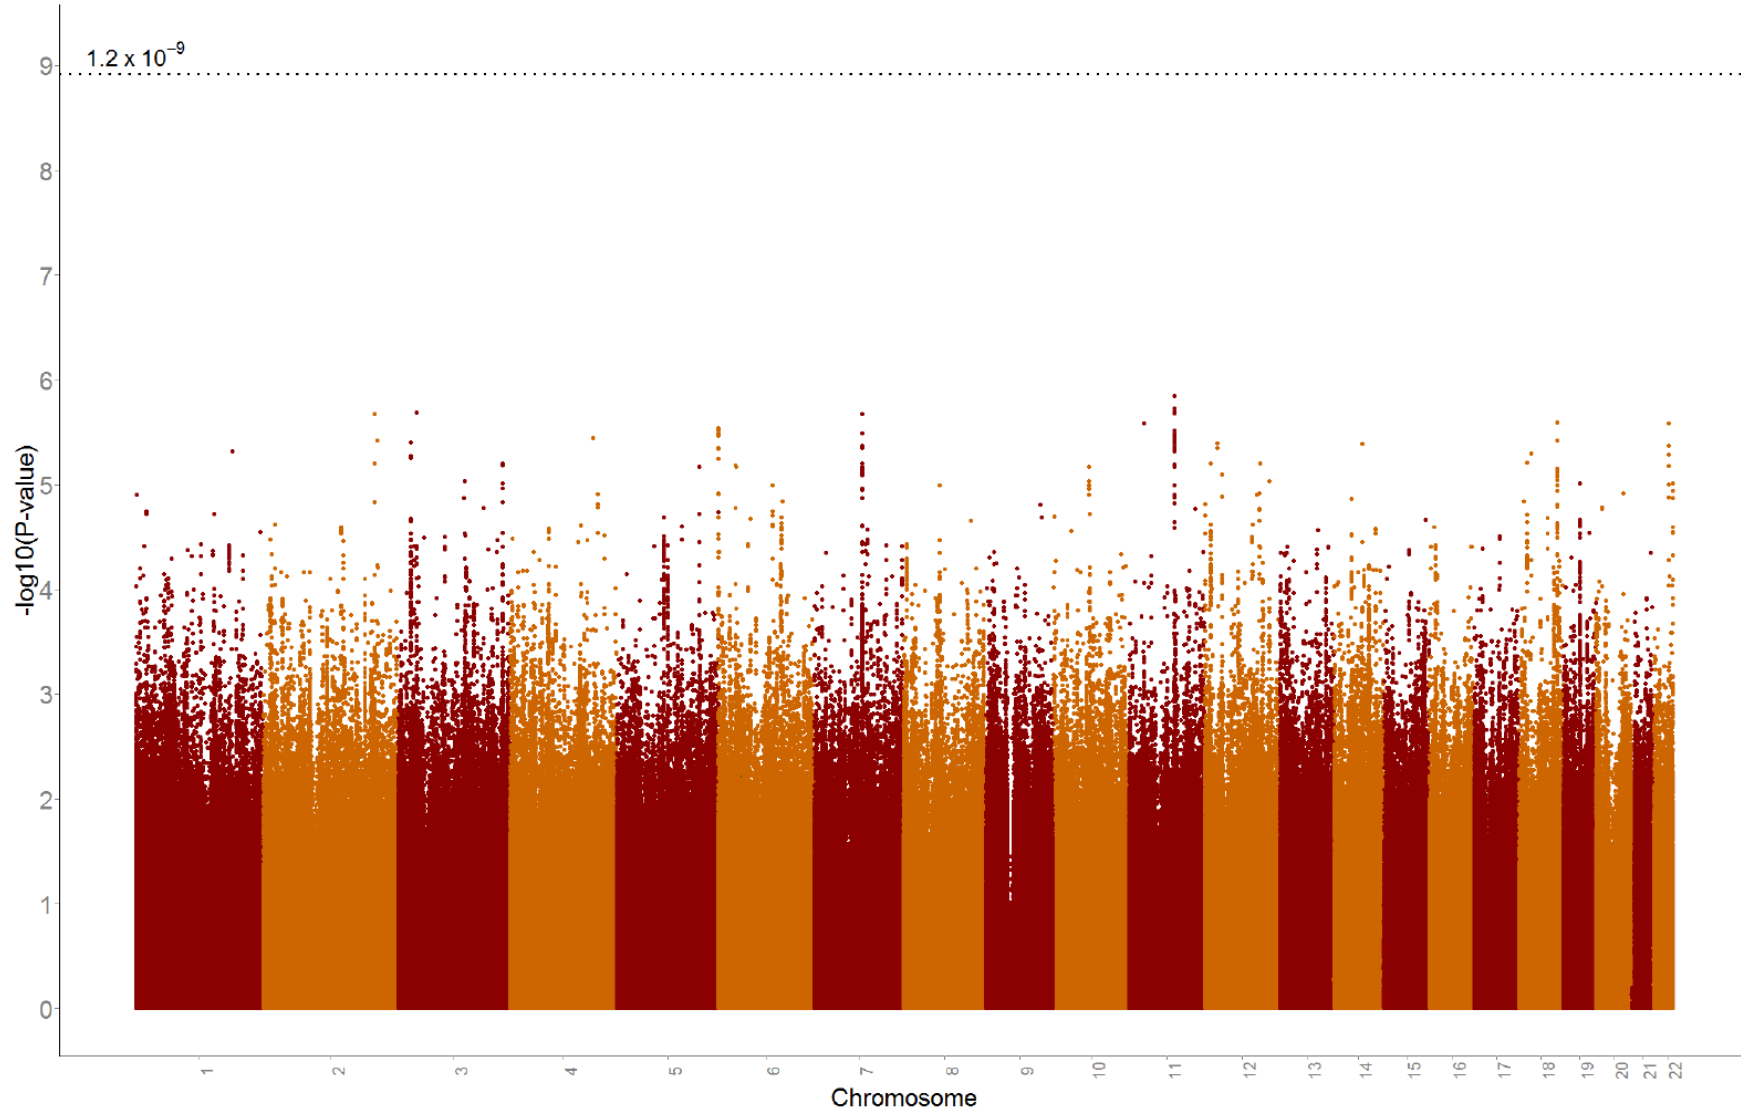

Manhattan plot for macrophage inflammatory protein-1 $\alpha$  (CCL3)

Figure S32

# MIP1b

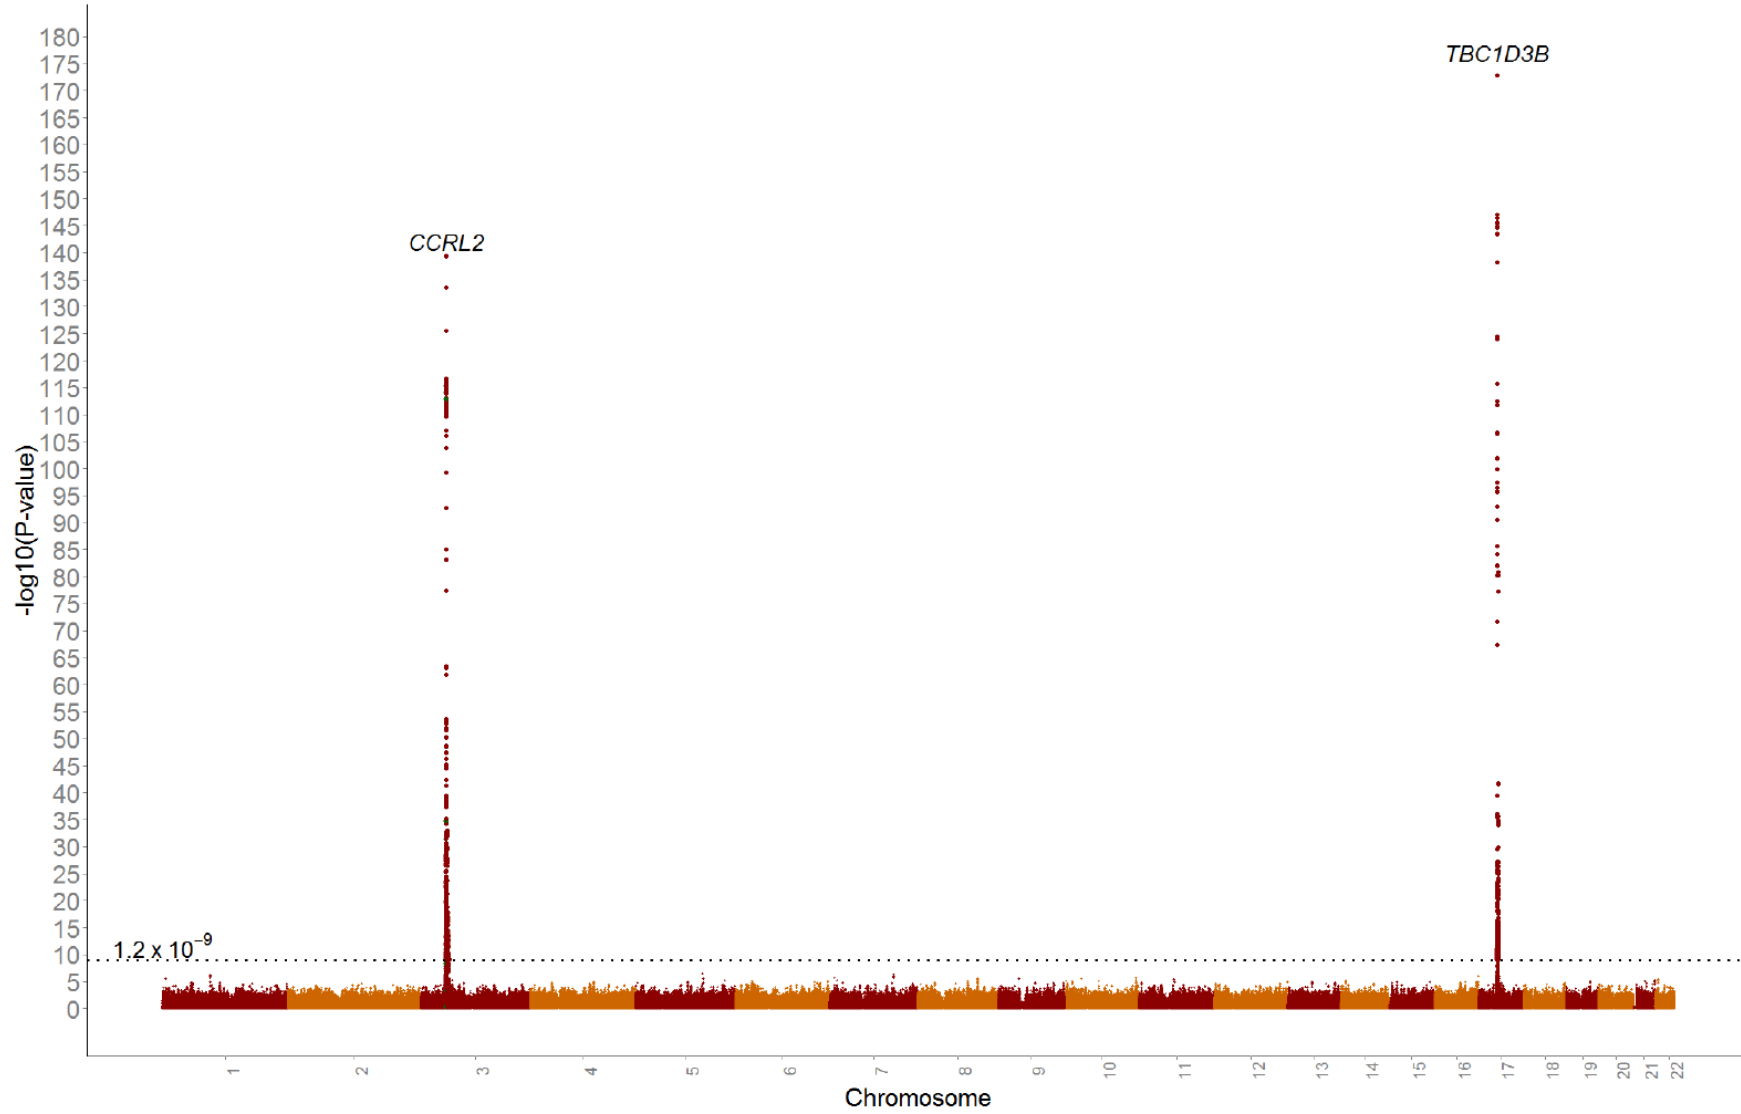

Manhattan plot for macrophage inflammatory protein-1 $\beta$  (MIP1b; CCL4).

**Figure S33**

# PDGFbb

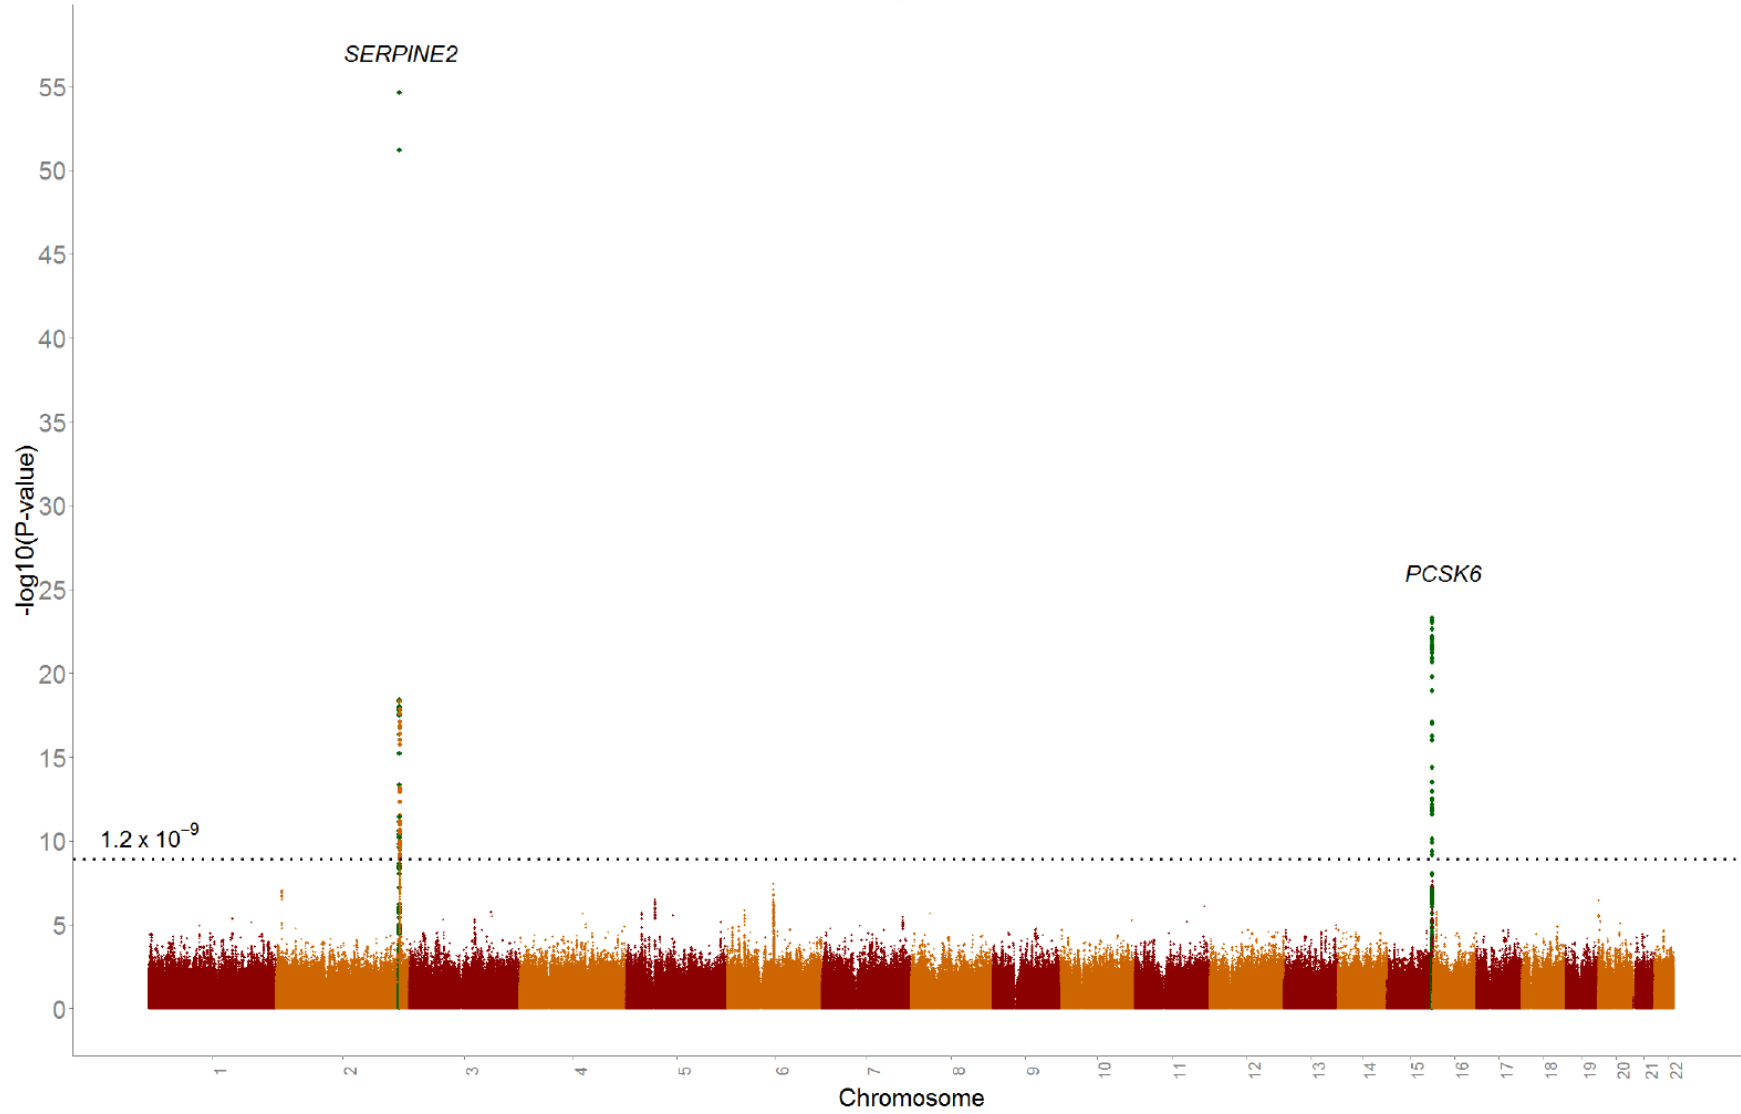

**Figure S34**

Manhattan plot for platelet derived growth factor BB (PDGFbb).

# RANTES

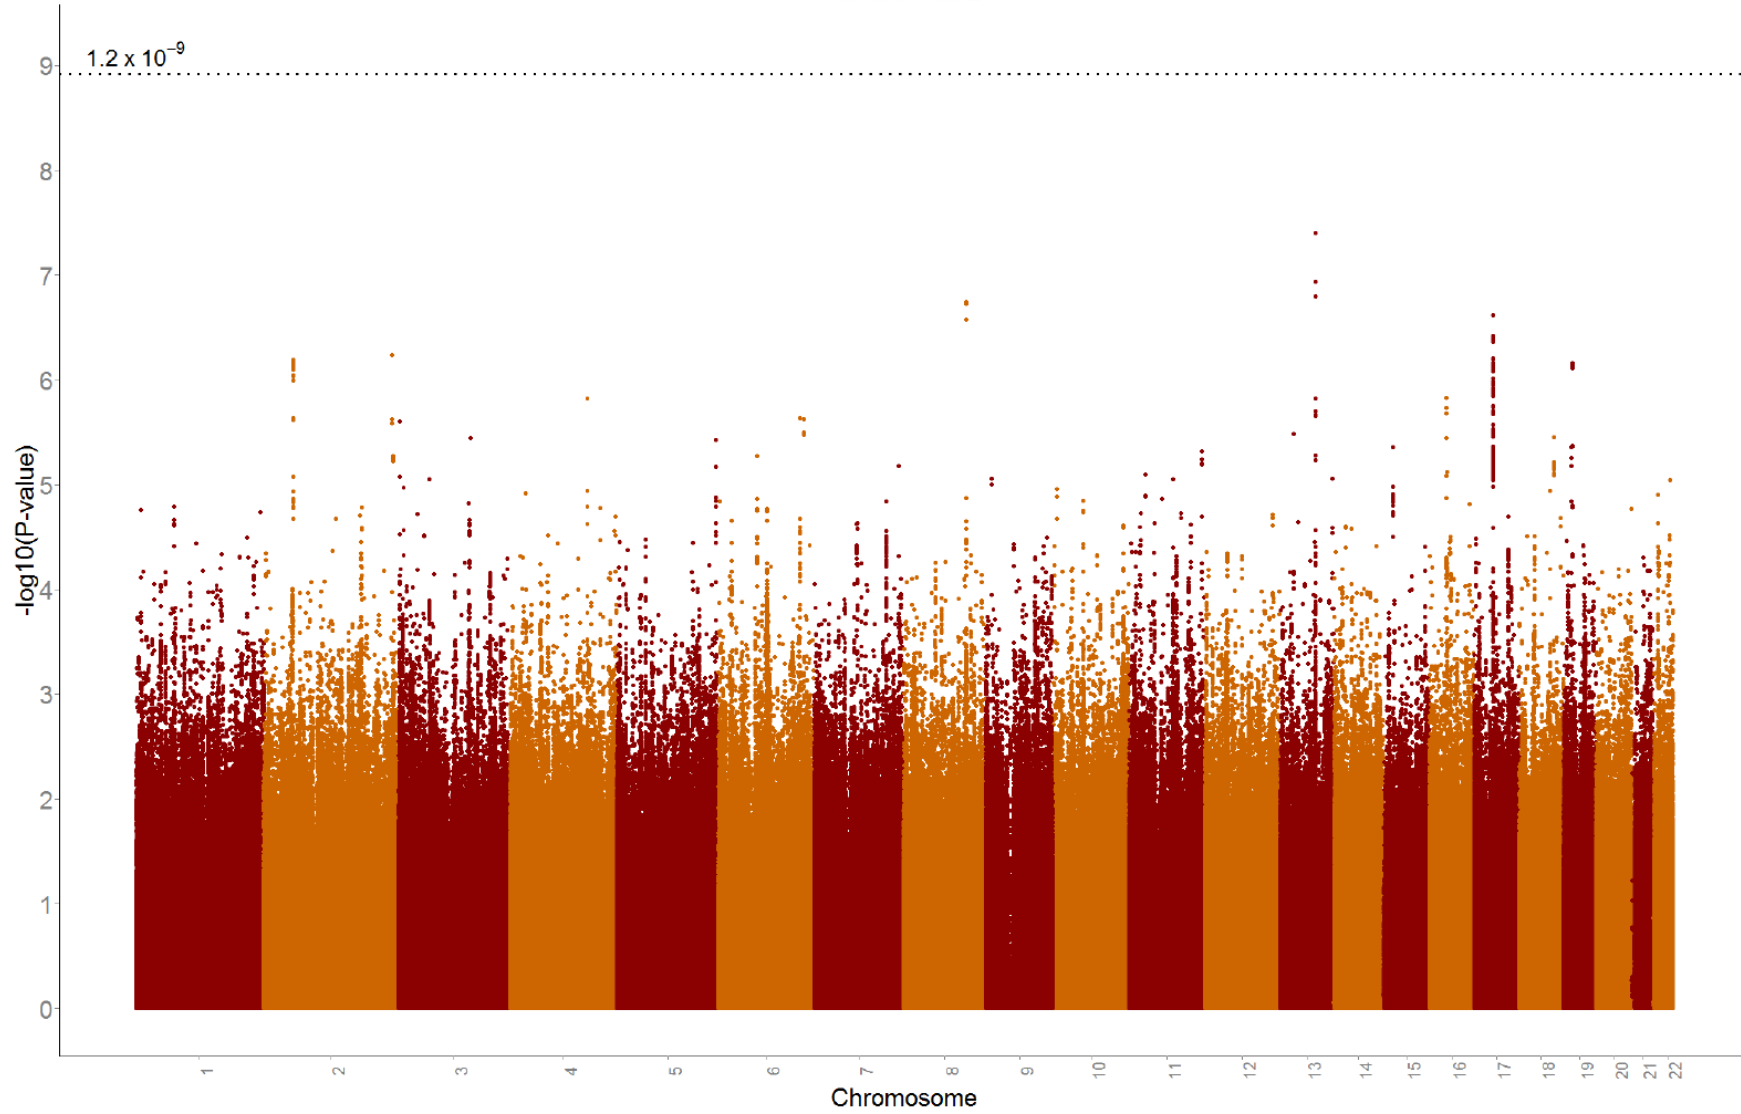

**Figure S35**

Manhattan plot for Regulated on Activation, Normal T Cell Expressed and Secreted (RANTES; CCL5).

# SCF

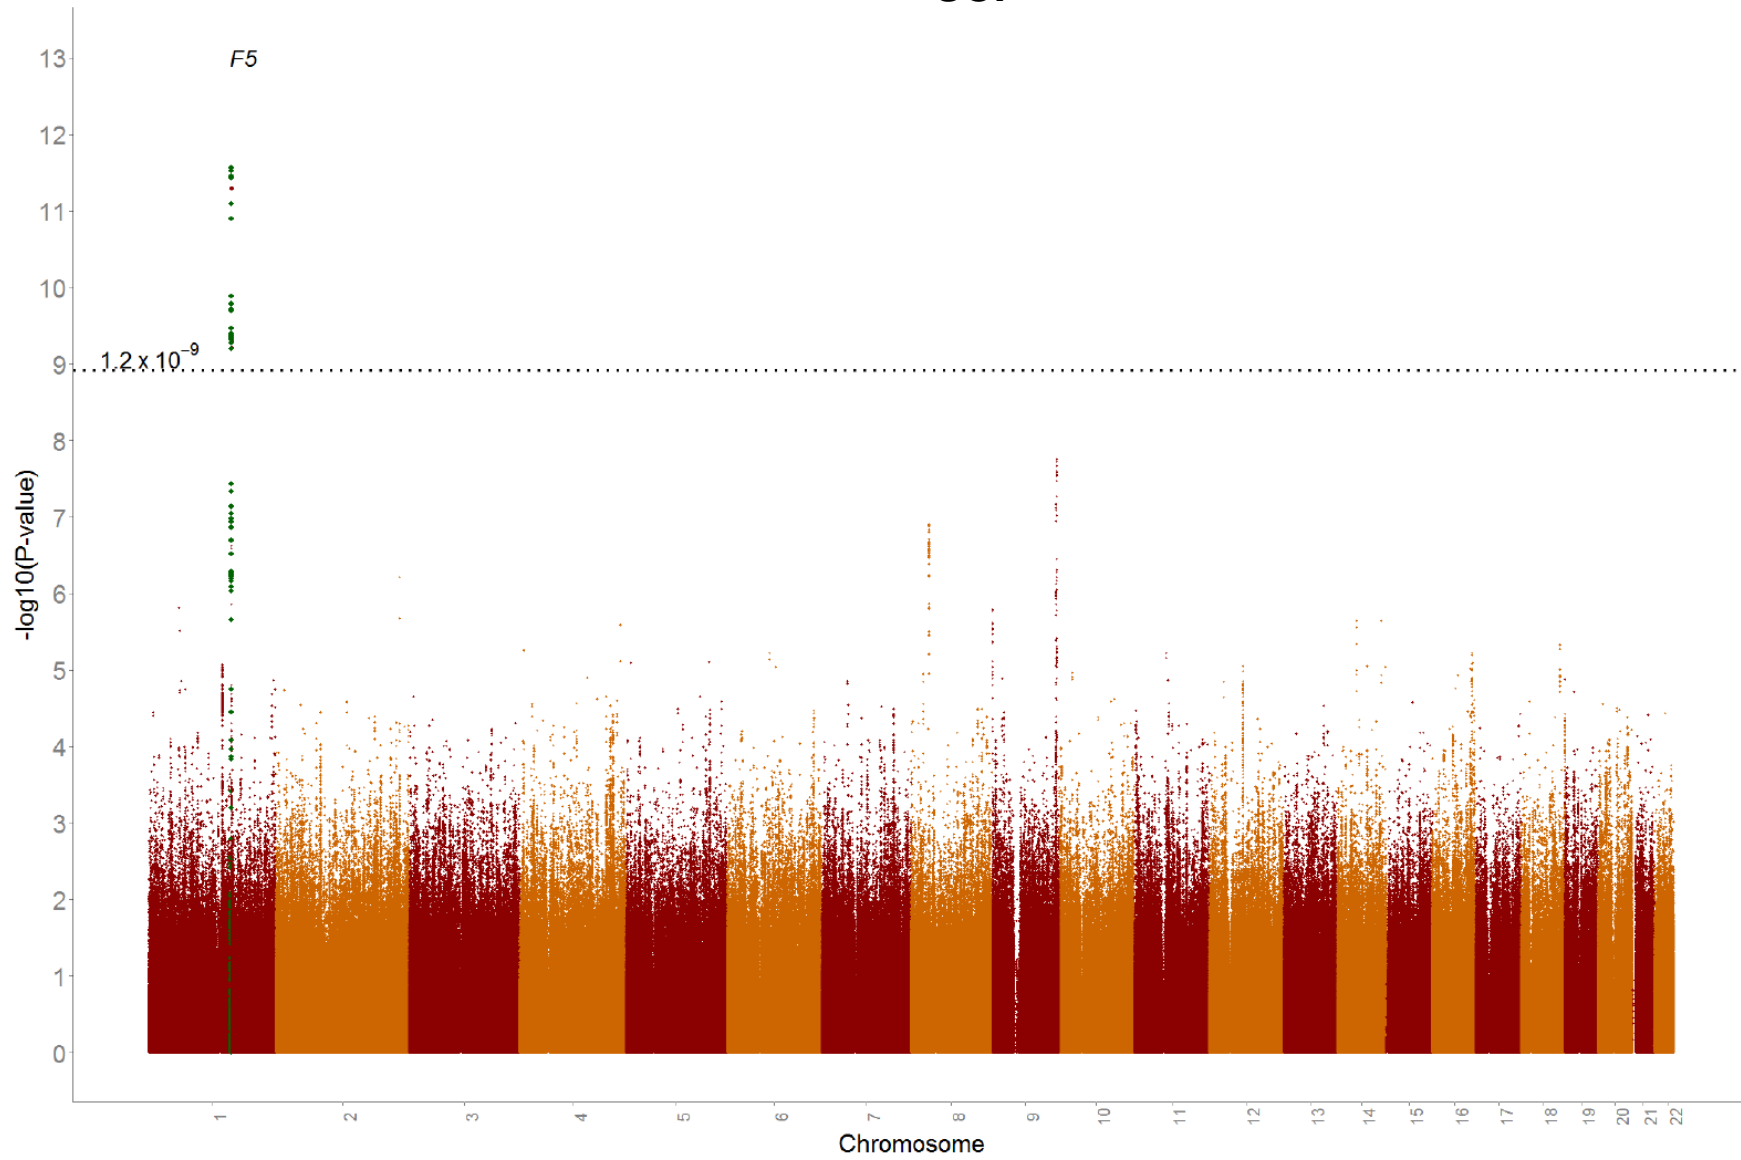

Manhattan plot for stem cell factor (SCF).

Figure S36

# SCGFb

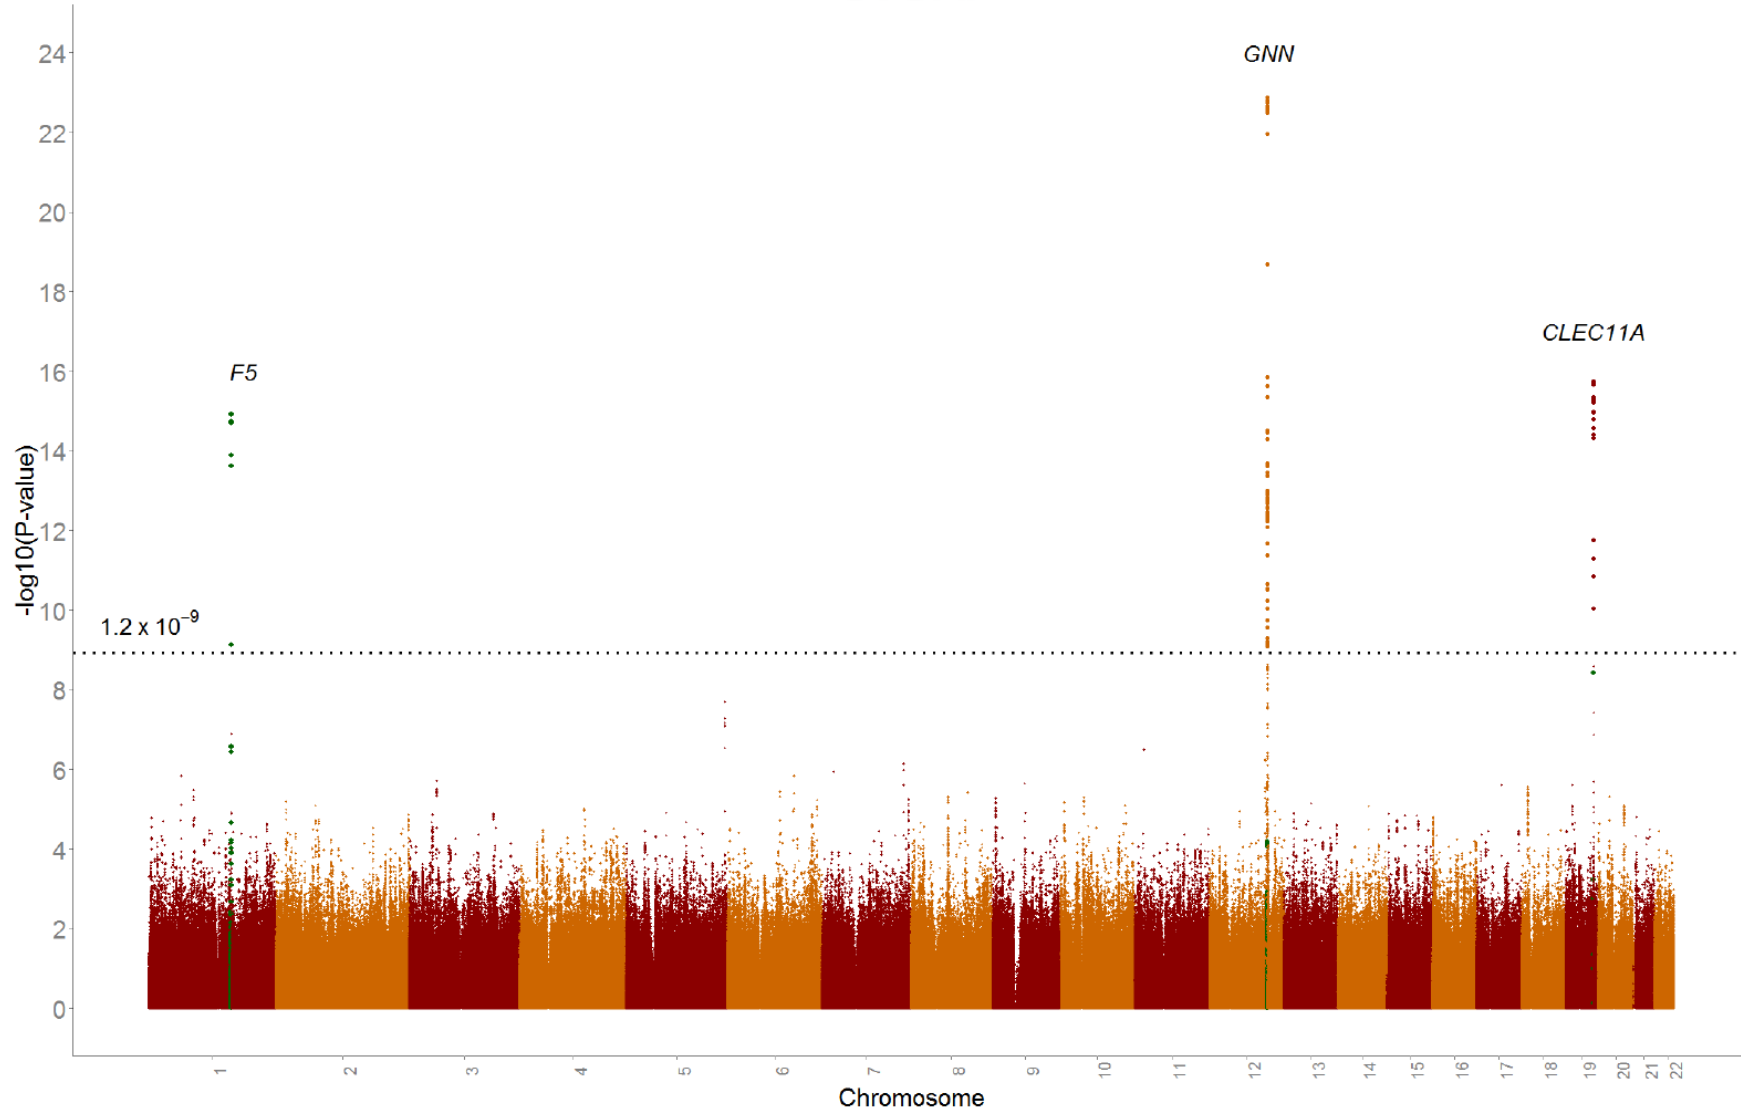

Manhattan plot for stem cell growth factor beta (SCGFb).

**Figure S37**

# SDF1a

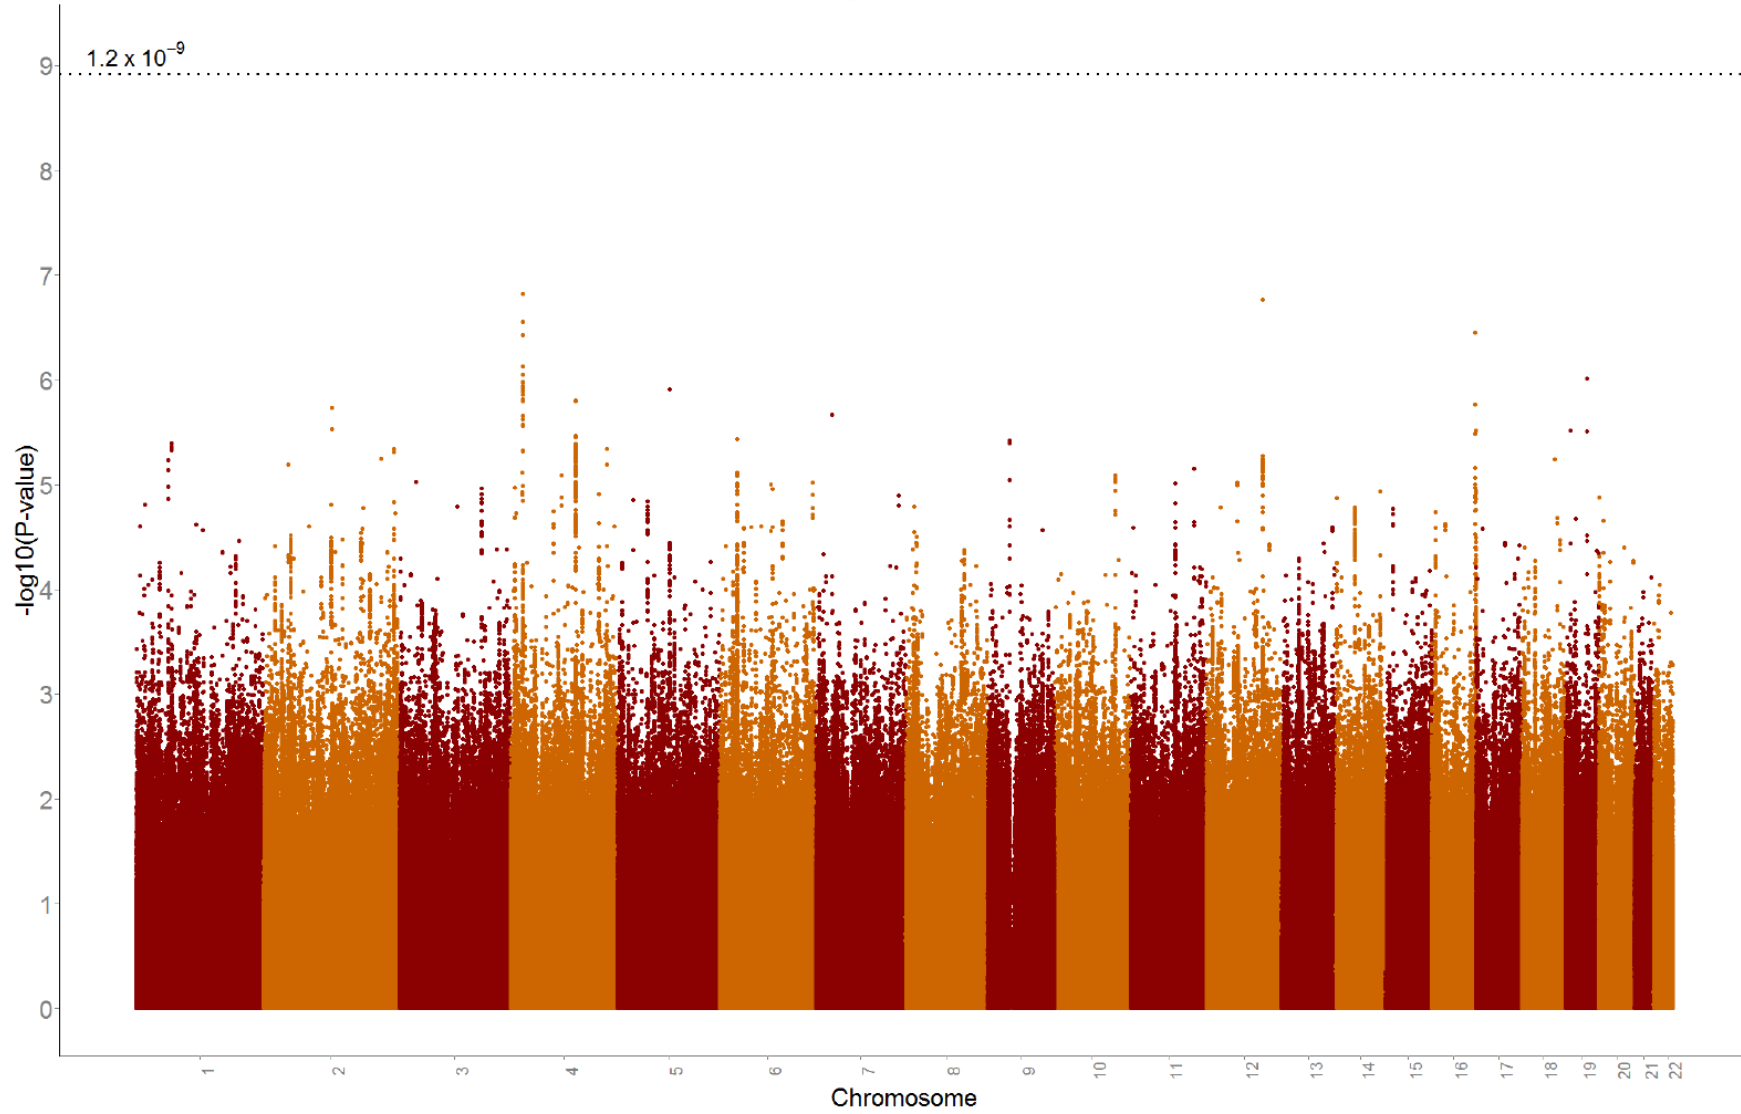

Manhattan plot for stromal cell-derived factor-1 alpha (SDF1a; CXCL12)

**Figure S38**

# TNFa

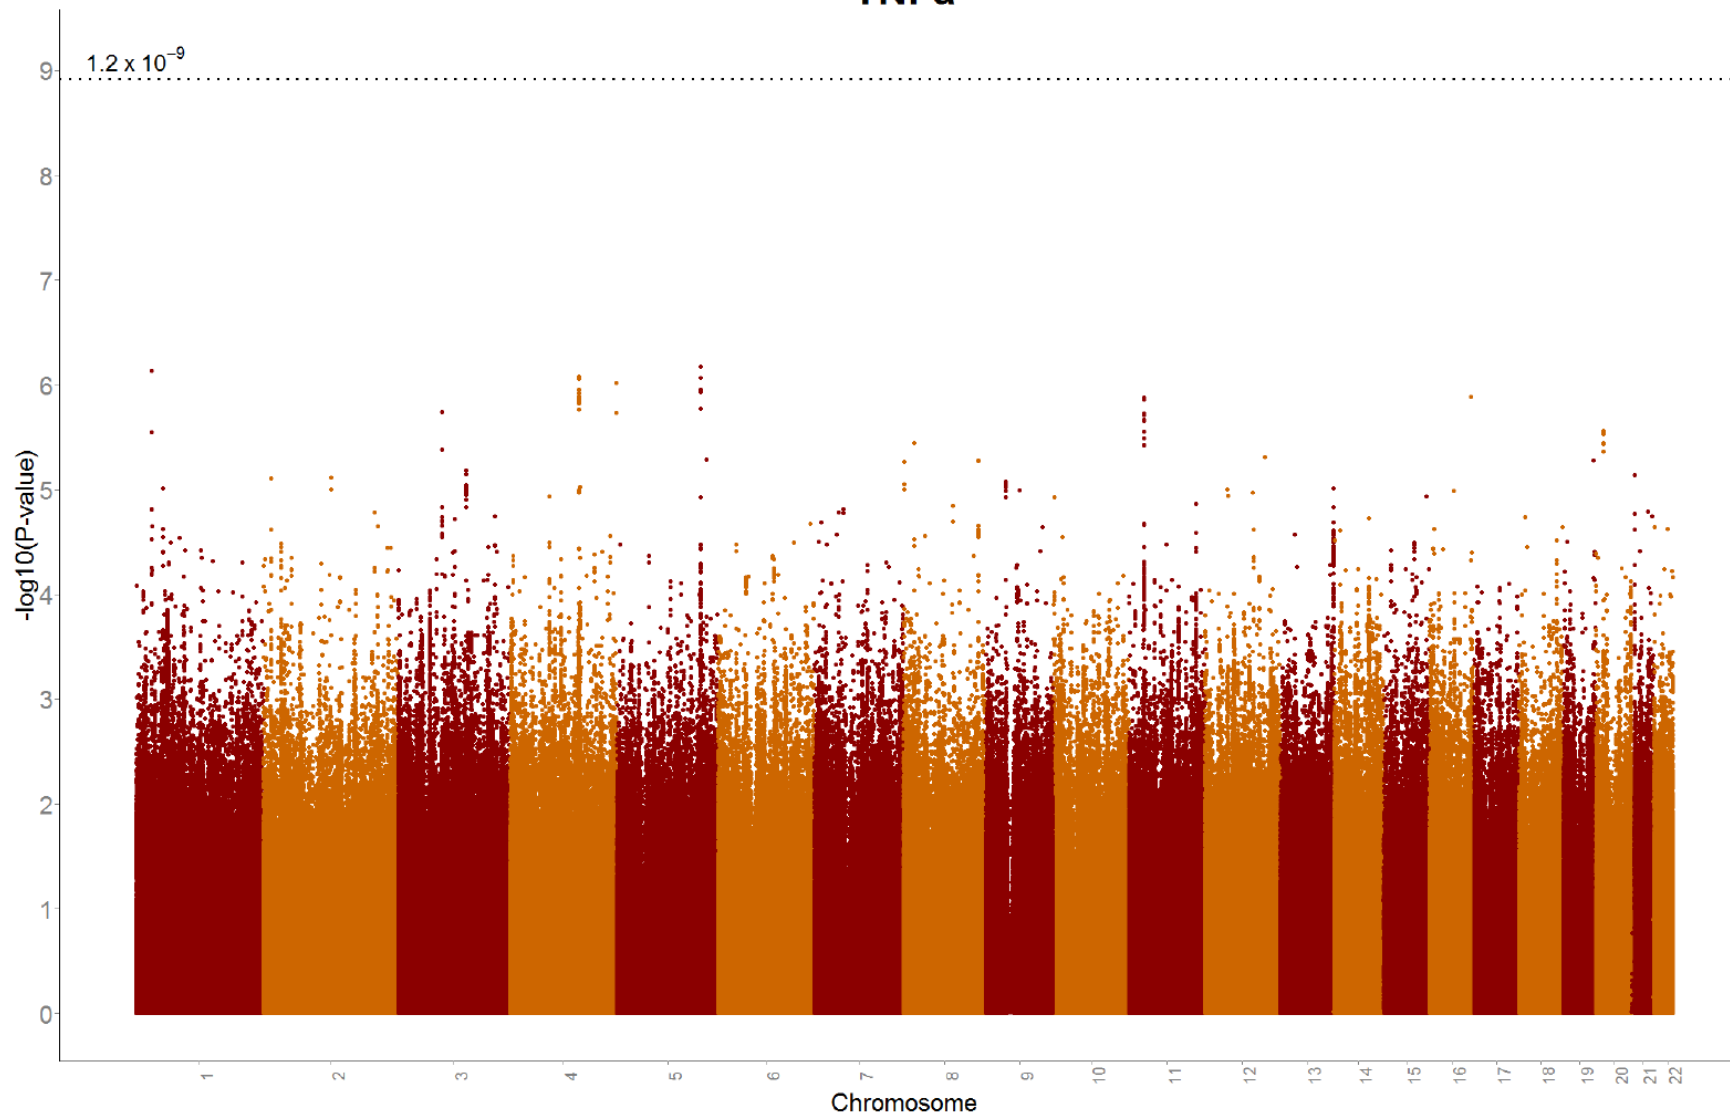

Manhattan plot for tumor necrosis factor-alpha (TNFa).

**Figure S39**



# TNFb

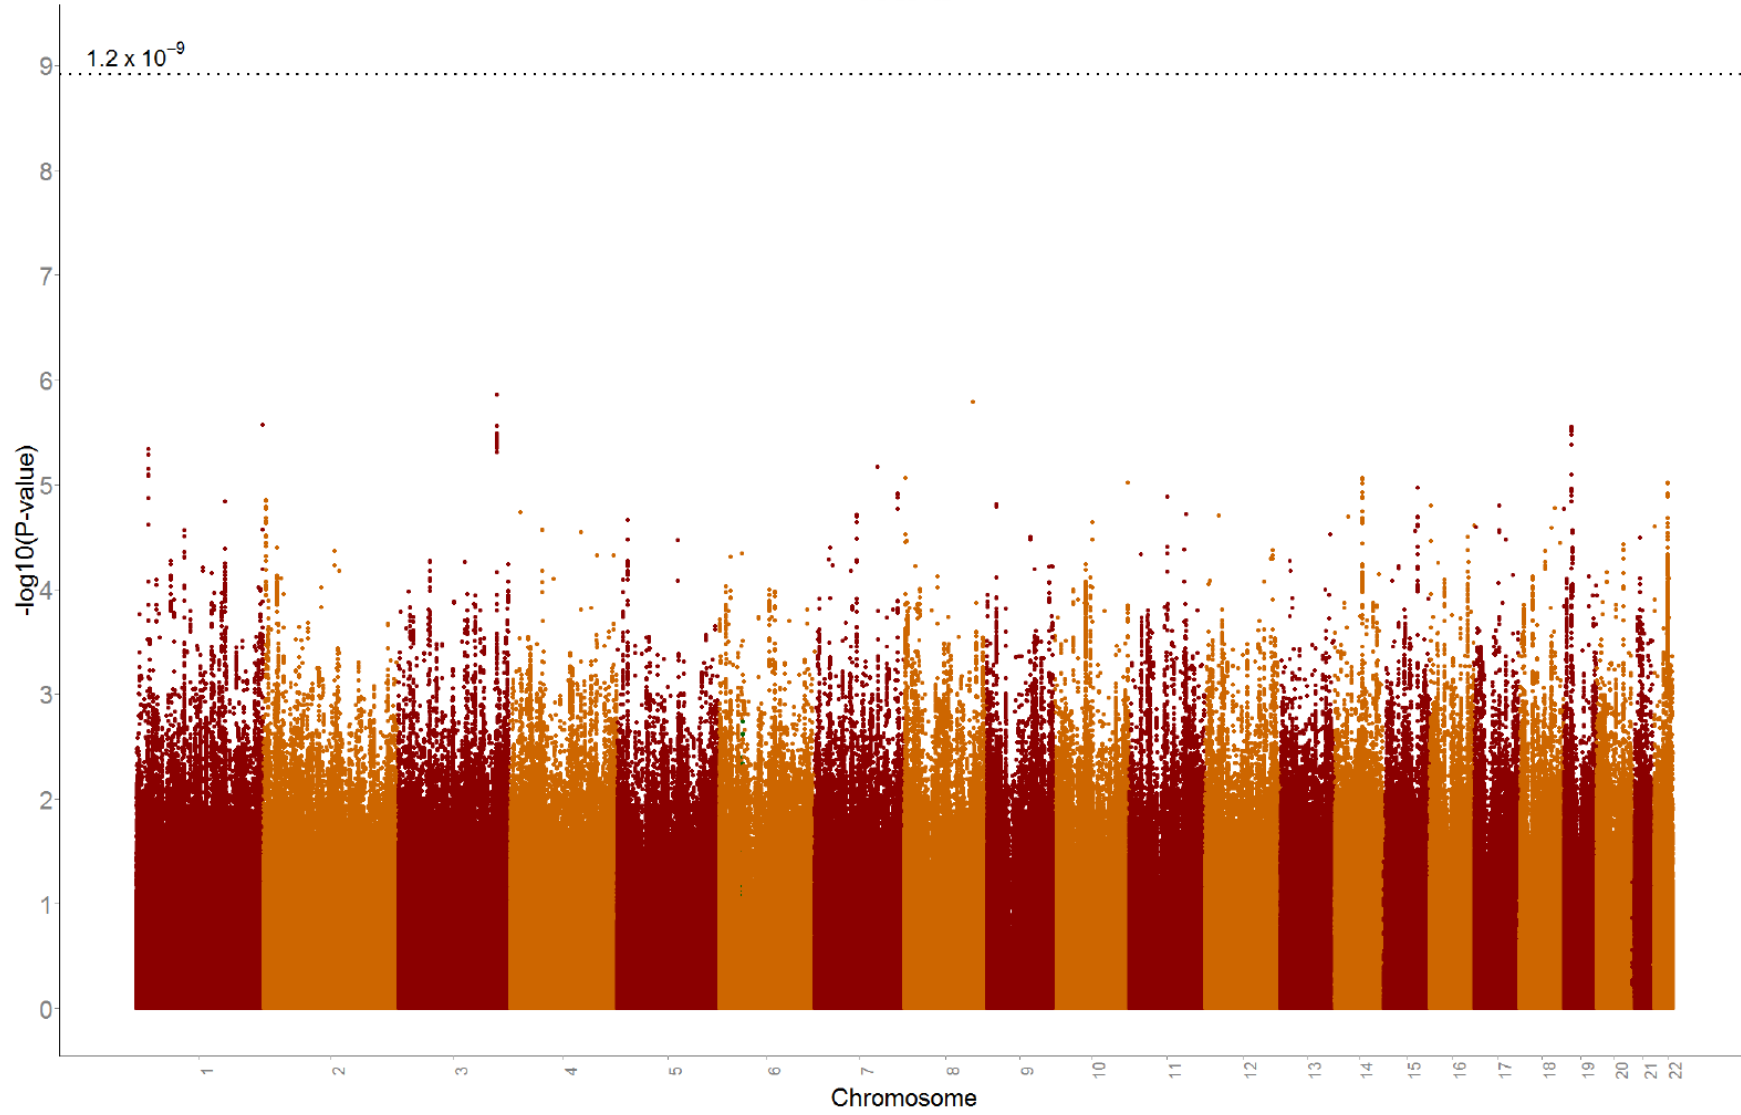

Manhattan plot for tumor necrosis factor-beta (TNFb).

**Figure S40**

# TRAIL

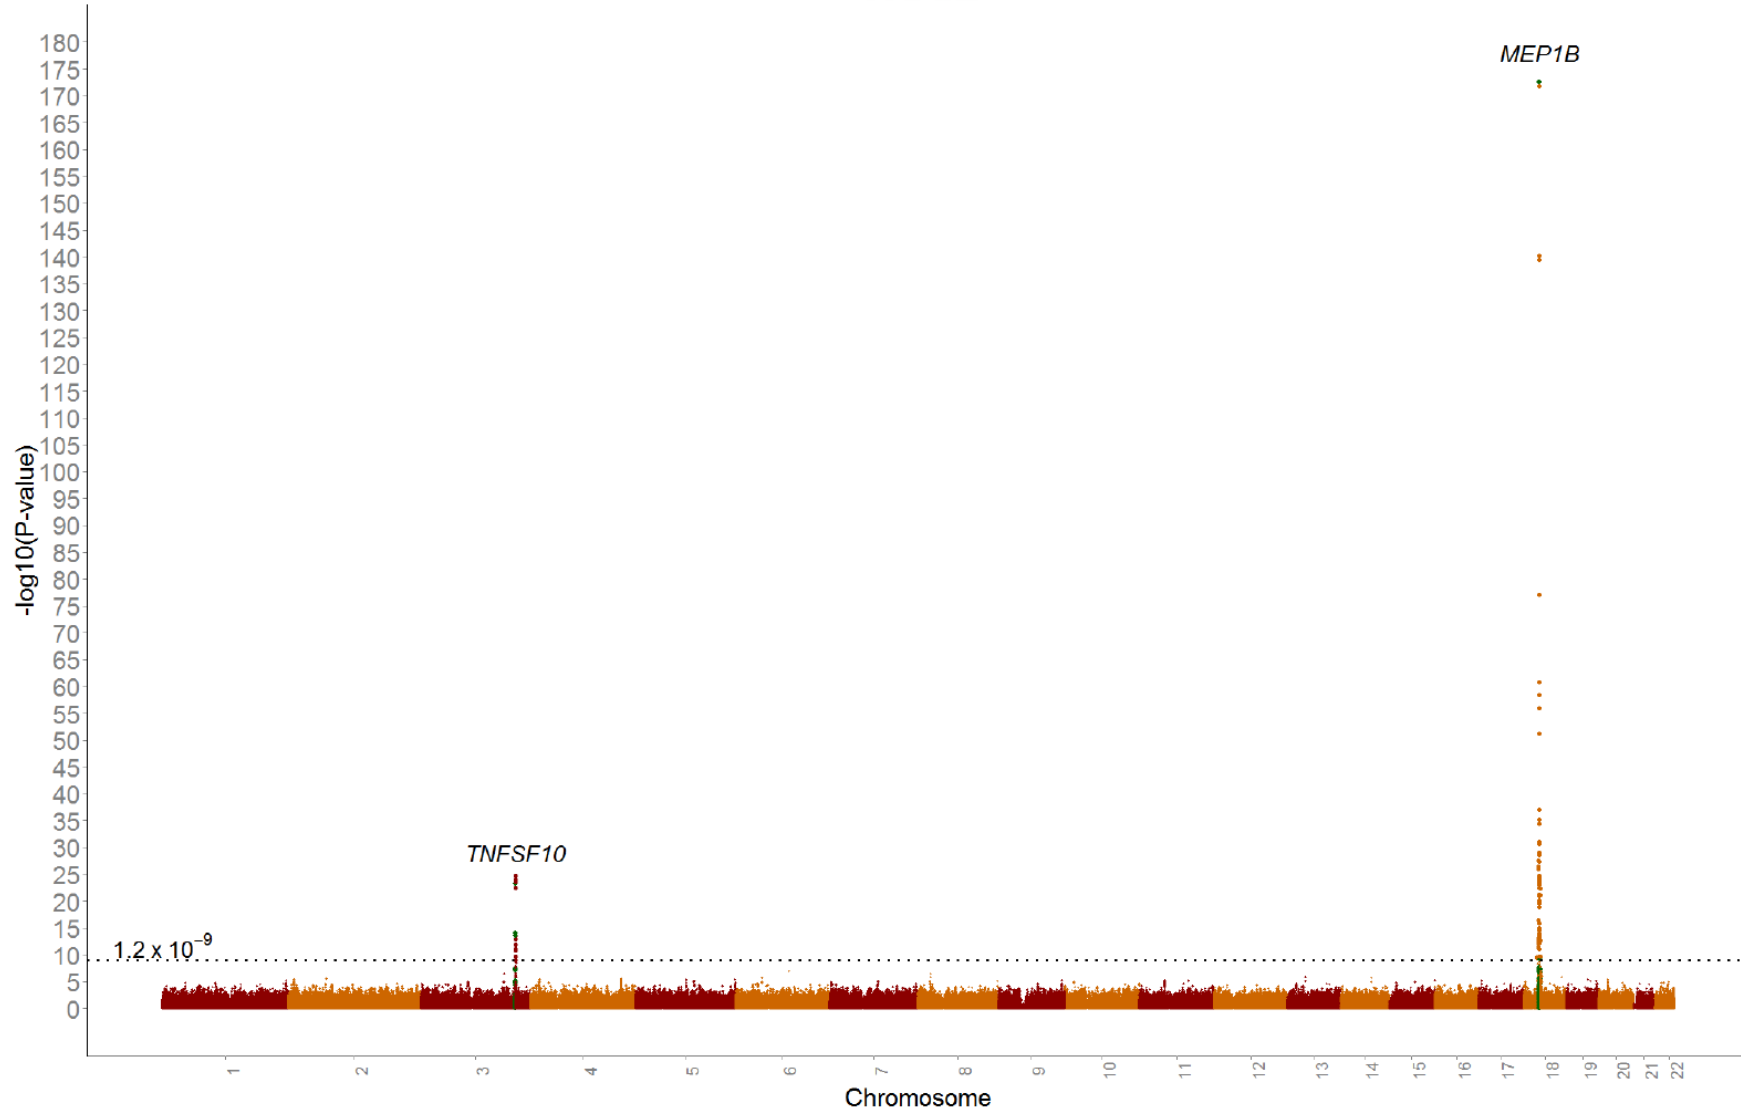

**Figure S41**

Manhattan plot for TNF-related apoptosis inducing ligand (TRAIL).

# VEGF

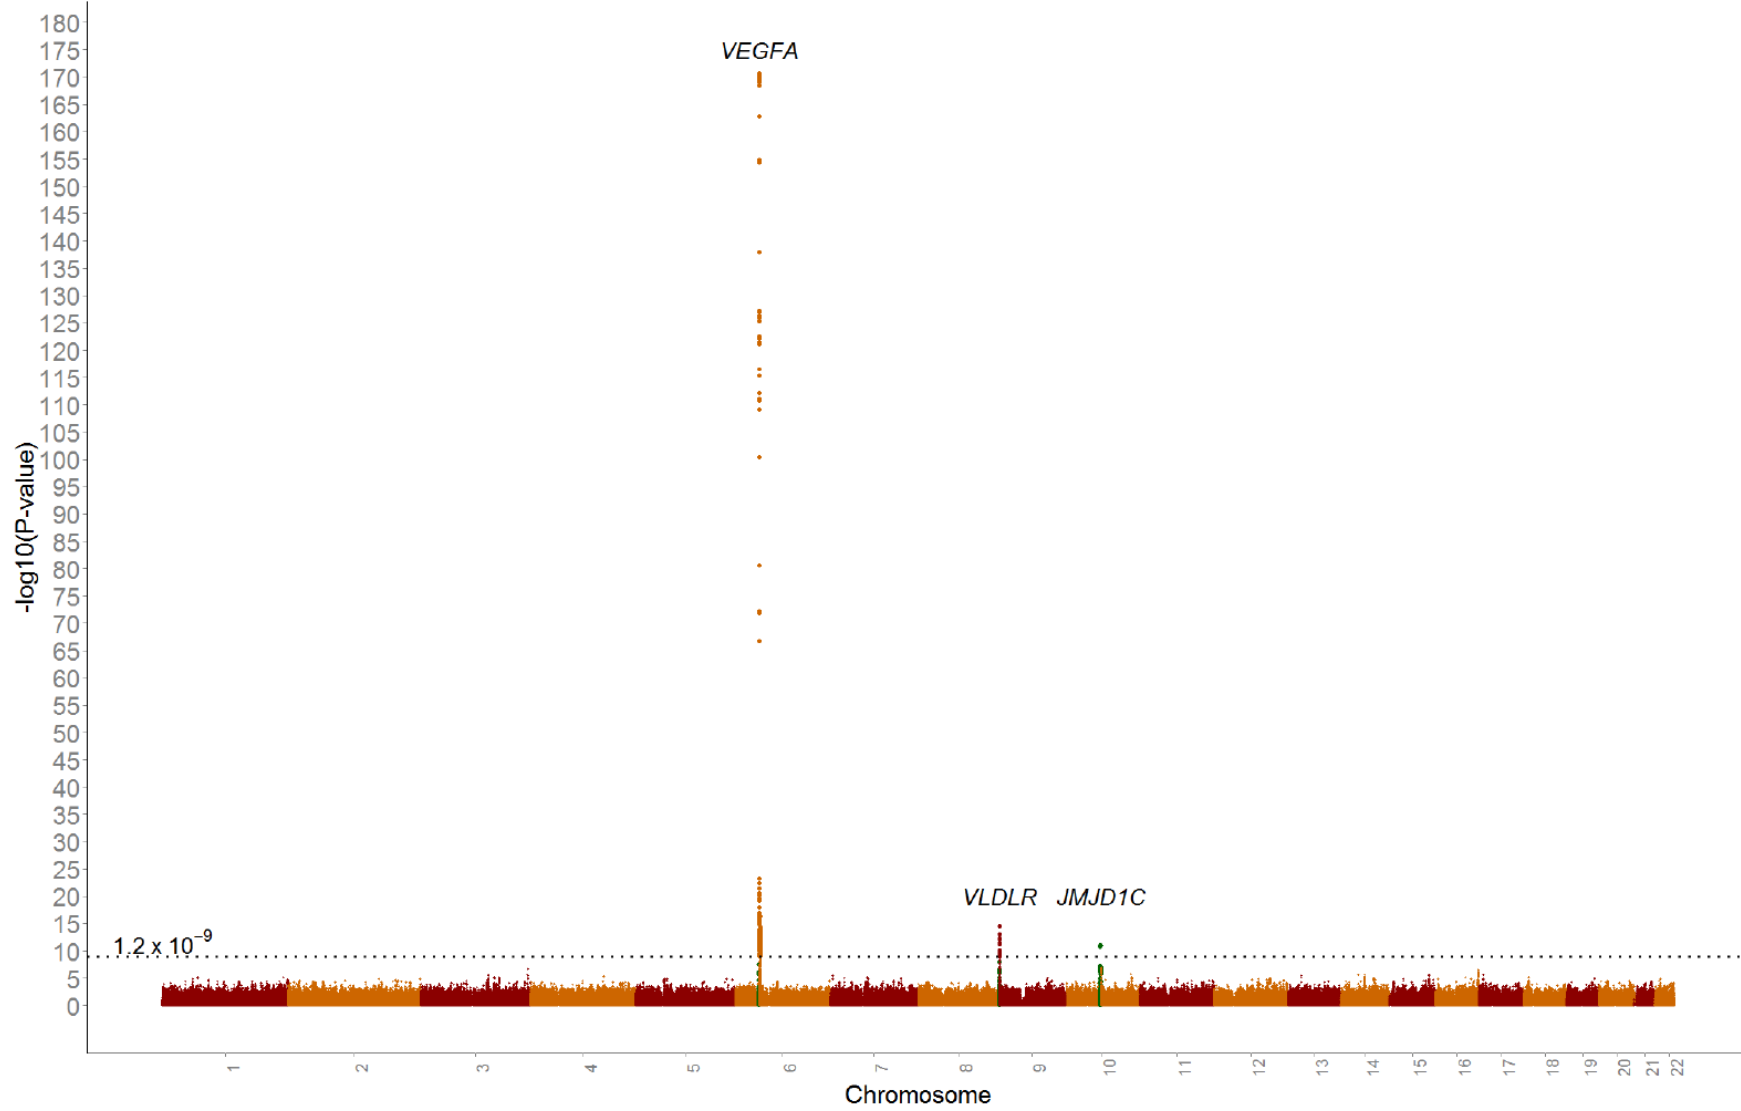

Figure S42

Manhattan plot for vascular endothelial growth factor (VEGF).

## MCP1 – 1q23.2

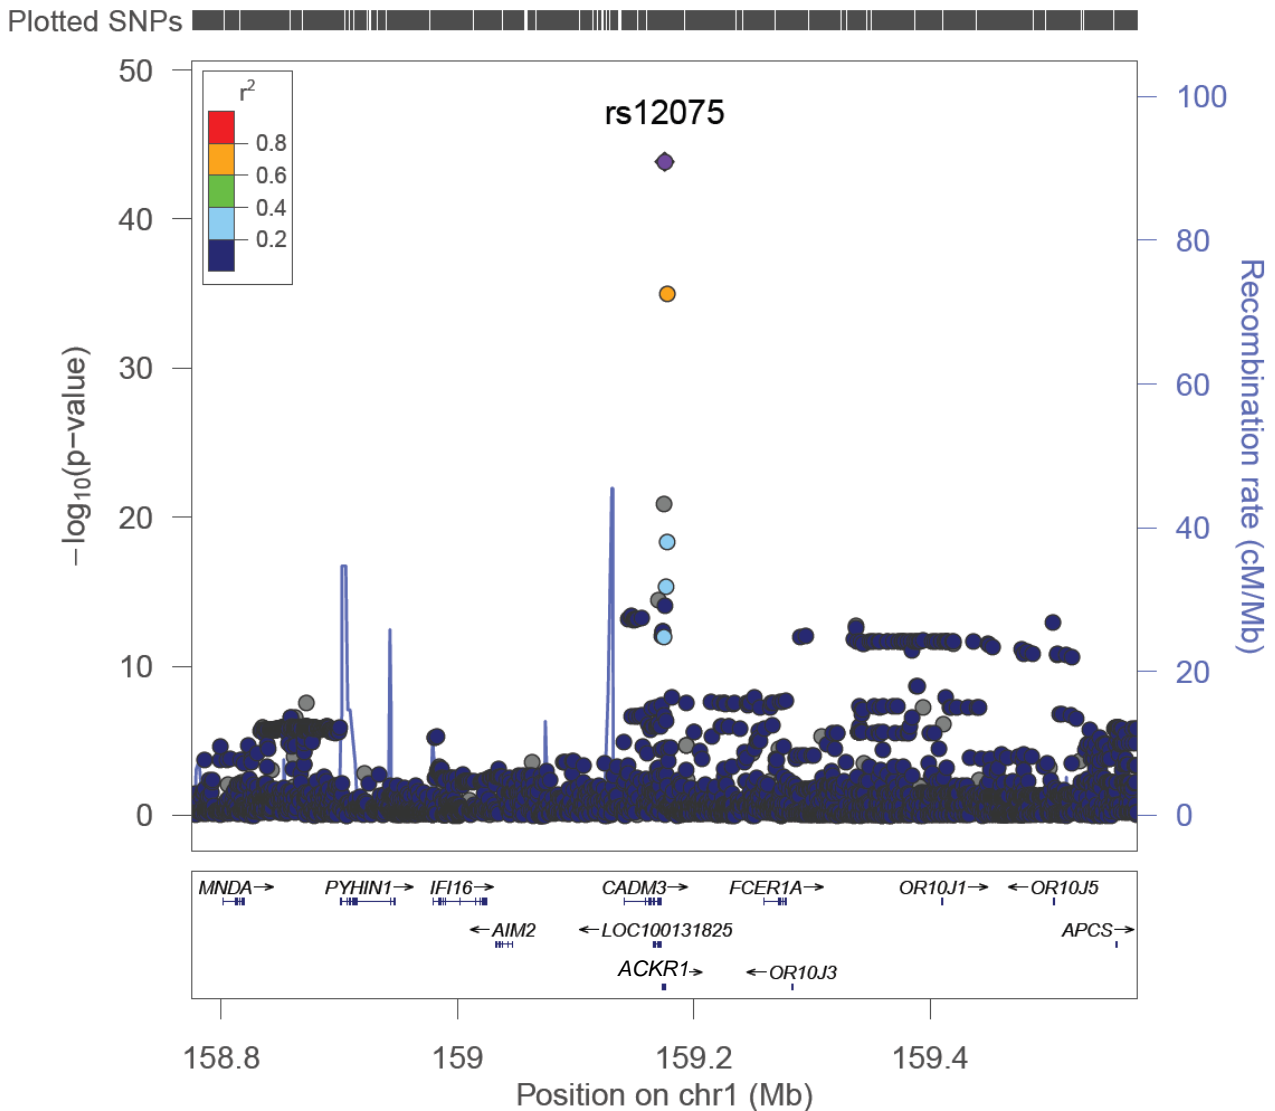

**Figure S43** Locus Zoom plot from 1q23.2. The associations are for monocyte chemotactic protein-1 (MCP1; CCL2). The lead SNP is located in *ACKR1* gene and the pertinent variant alters binding properties of MCP1 to the receptor.

# SCGFb – 1q24.2

Plotted SNPs

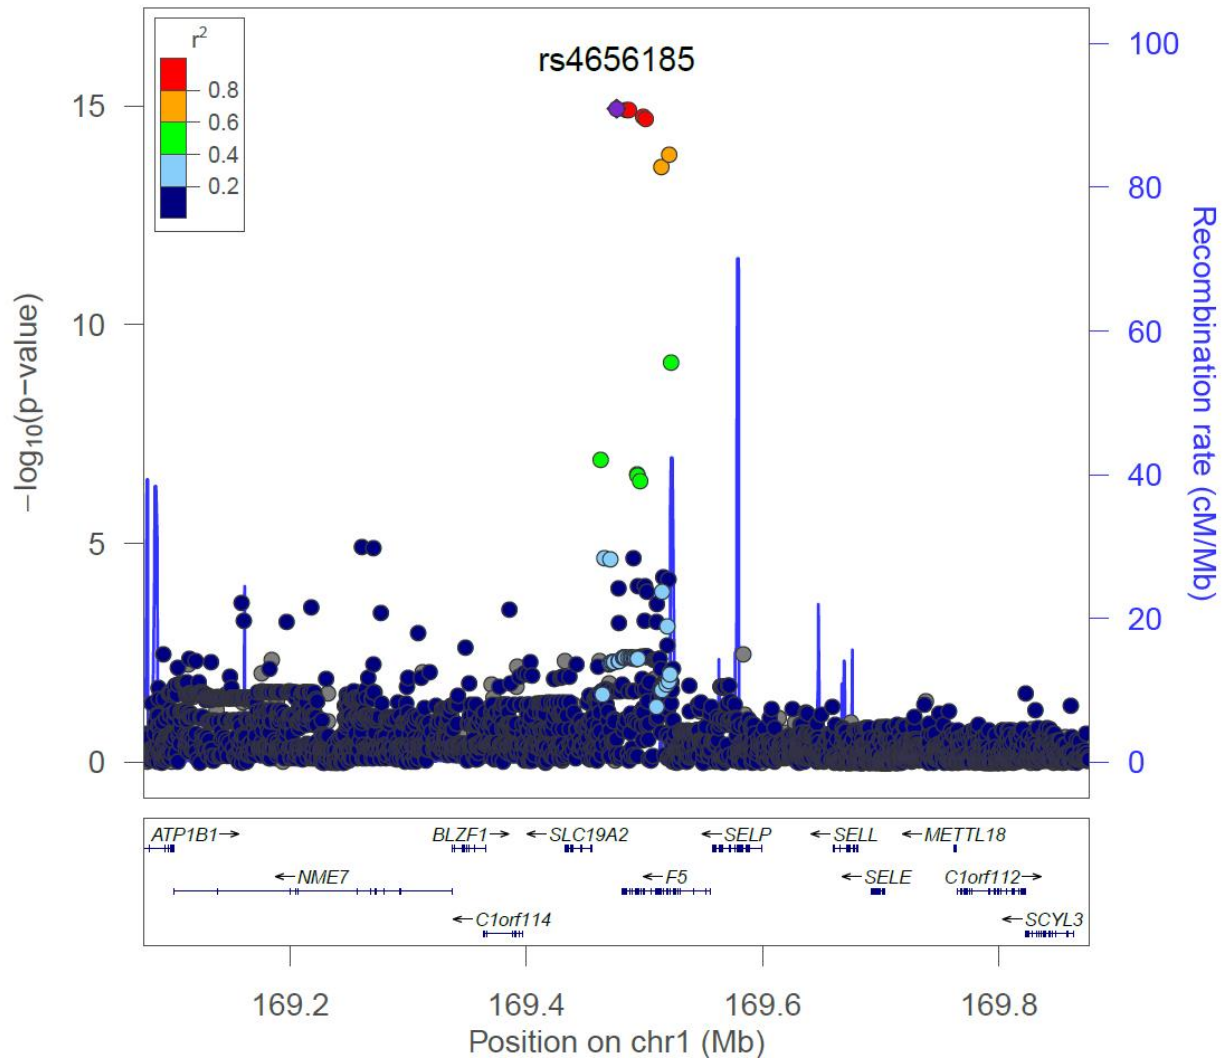

**Figure S44** Locus Zoom plot for stem cell factor beta (SCGFb) from 1q24.2.

# IL-18 – 2p22.3

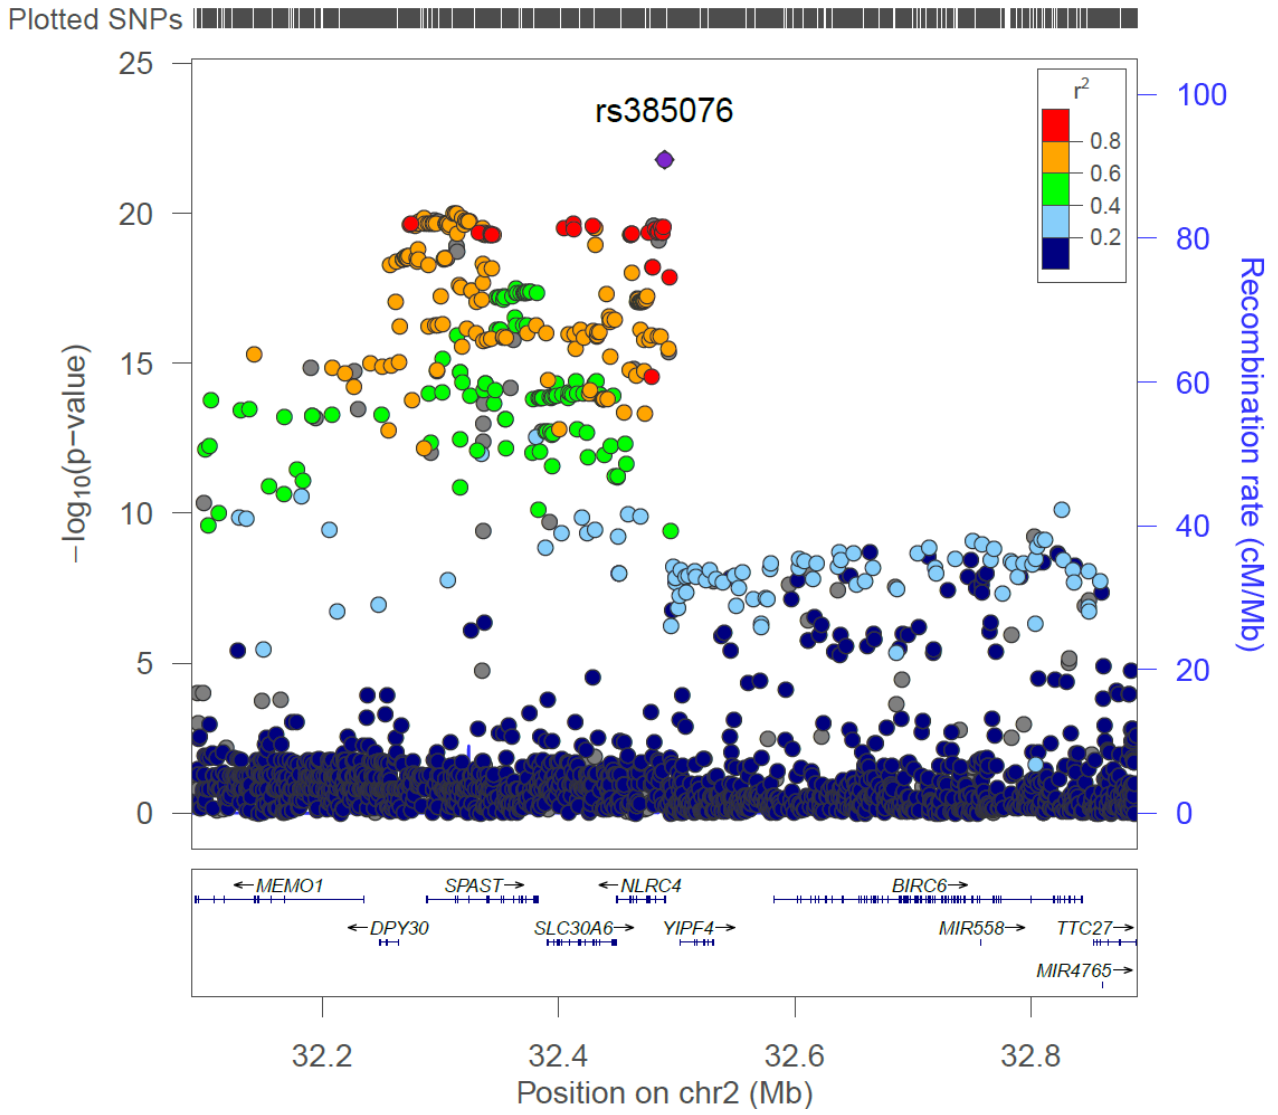

**Figure S45** Locus Zoom plot for interleukin-18 (IL-18) from 2p22.5.

# PDGFbb - 2q36.1

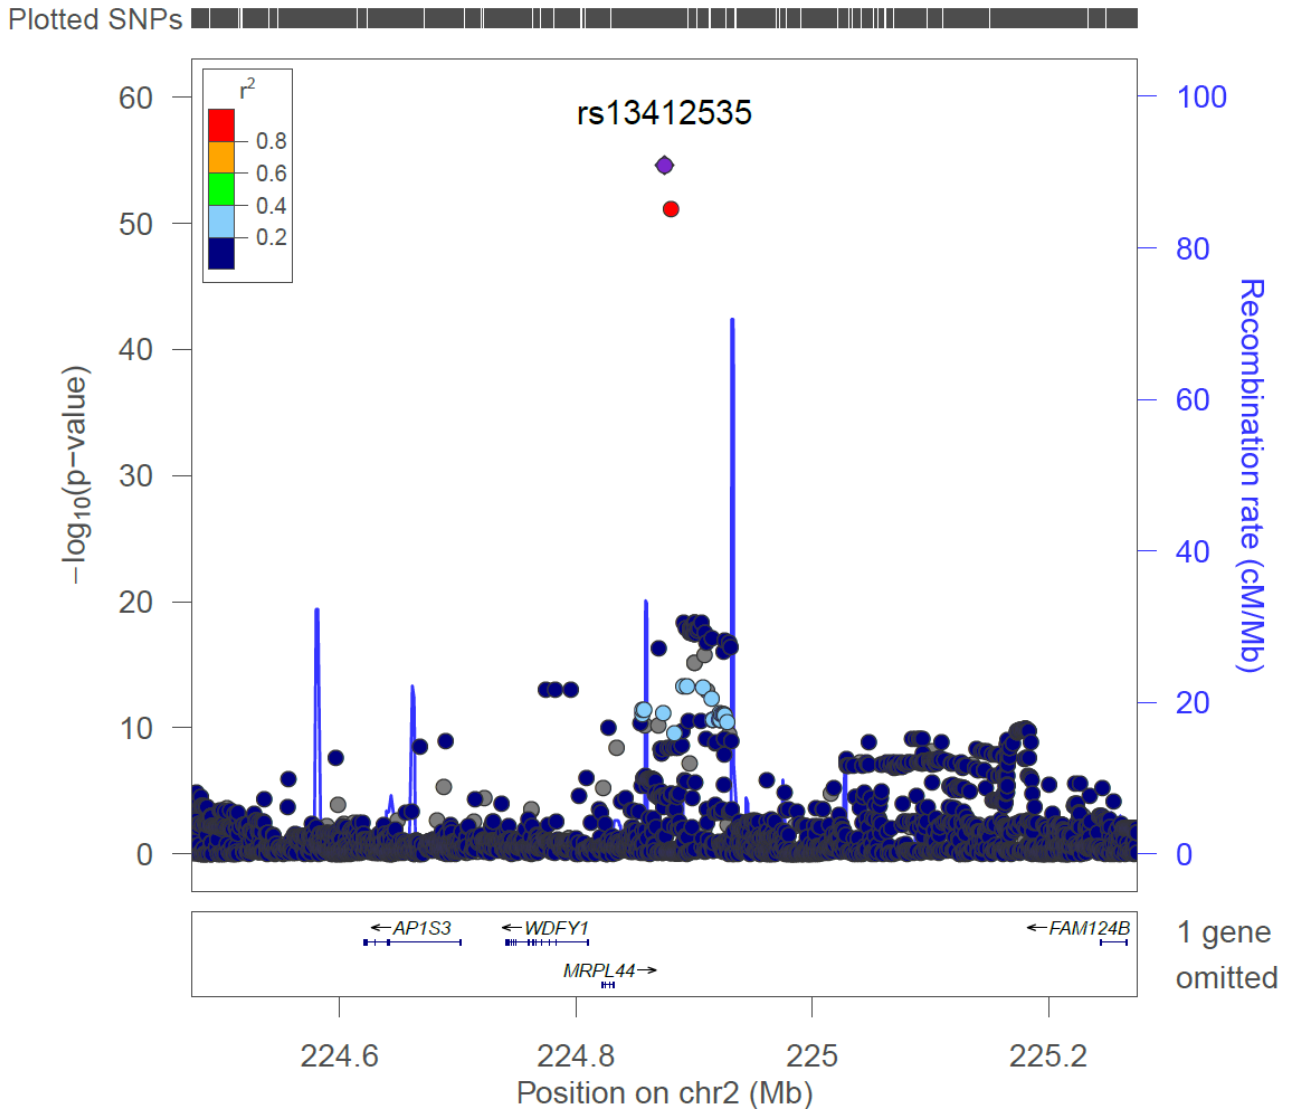

**Figure S46** Locus Zoom plot for platelet derived growth factor BB (PDGFbb) from 2q36.1.

# Eotaxin - 3p22.1

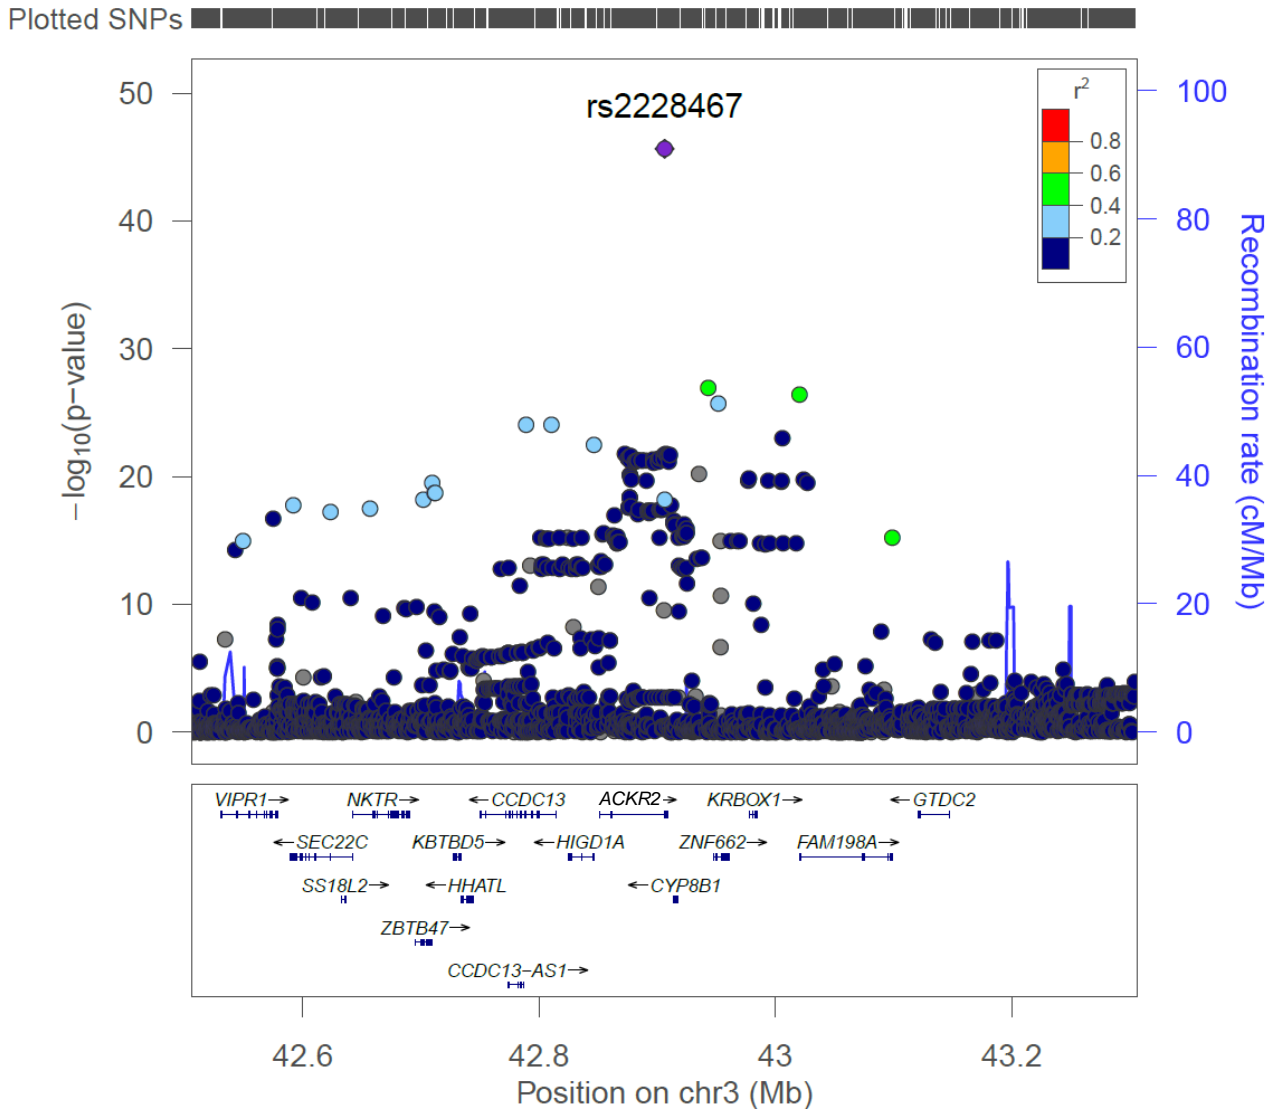

**Figure S47** Locus Zoom plot for eotaxin from 3p22.1 locus.



# MIP1b - 3p21.31

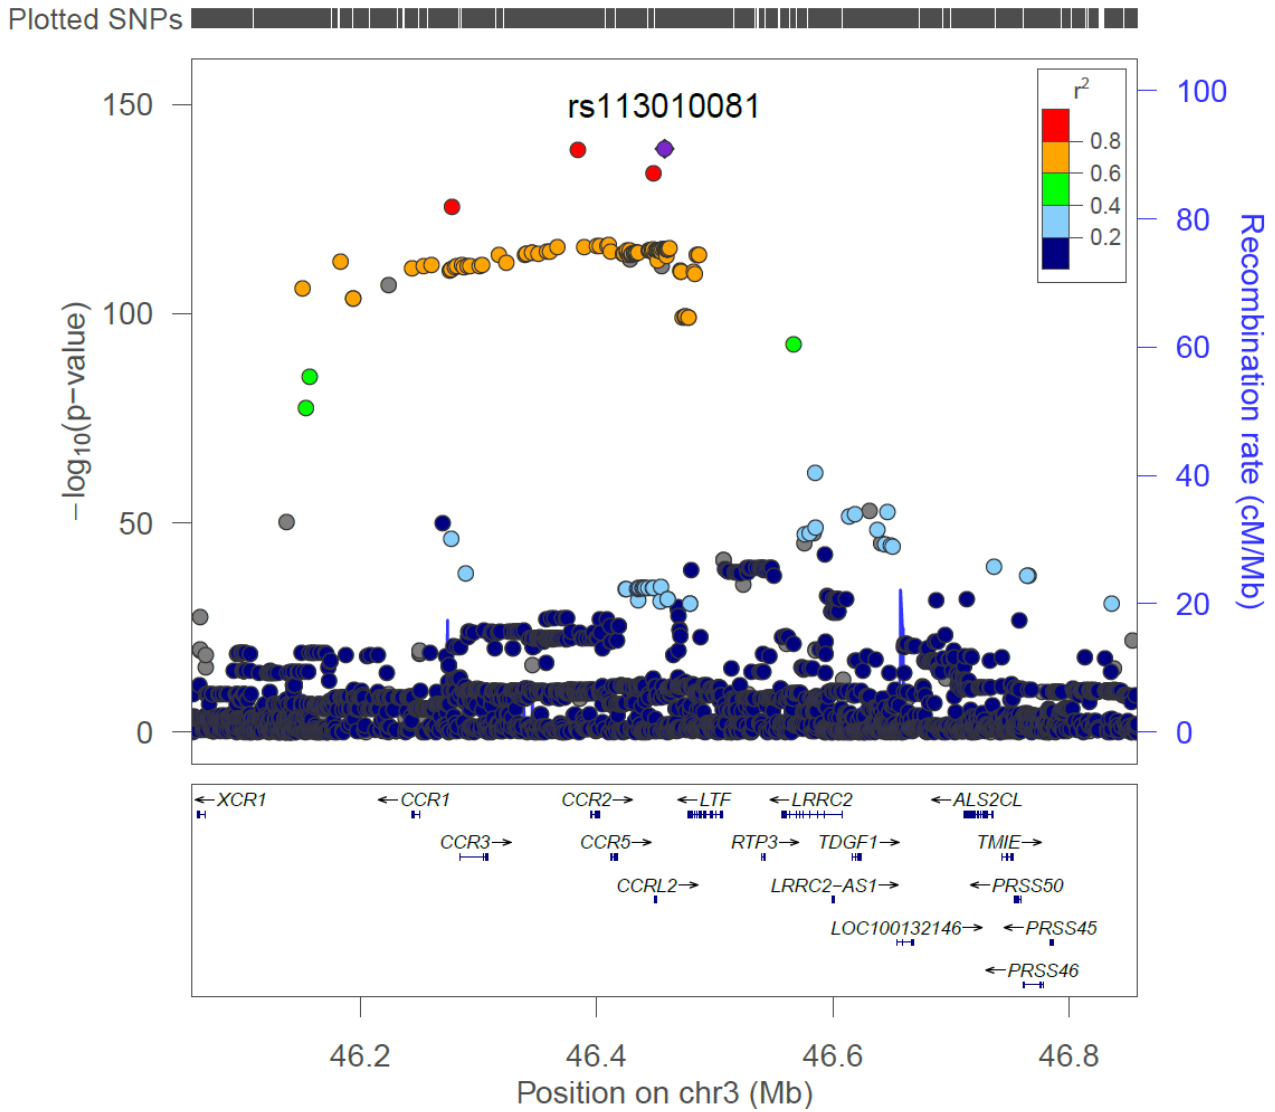

**Figure S48** Locus Zoom plot for macrophage inflammatory protein-1 $\beta$  (MIP1b; CCL4).

# IL-17 – 3q21.1

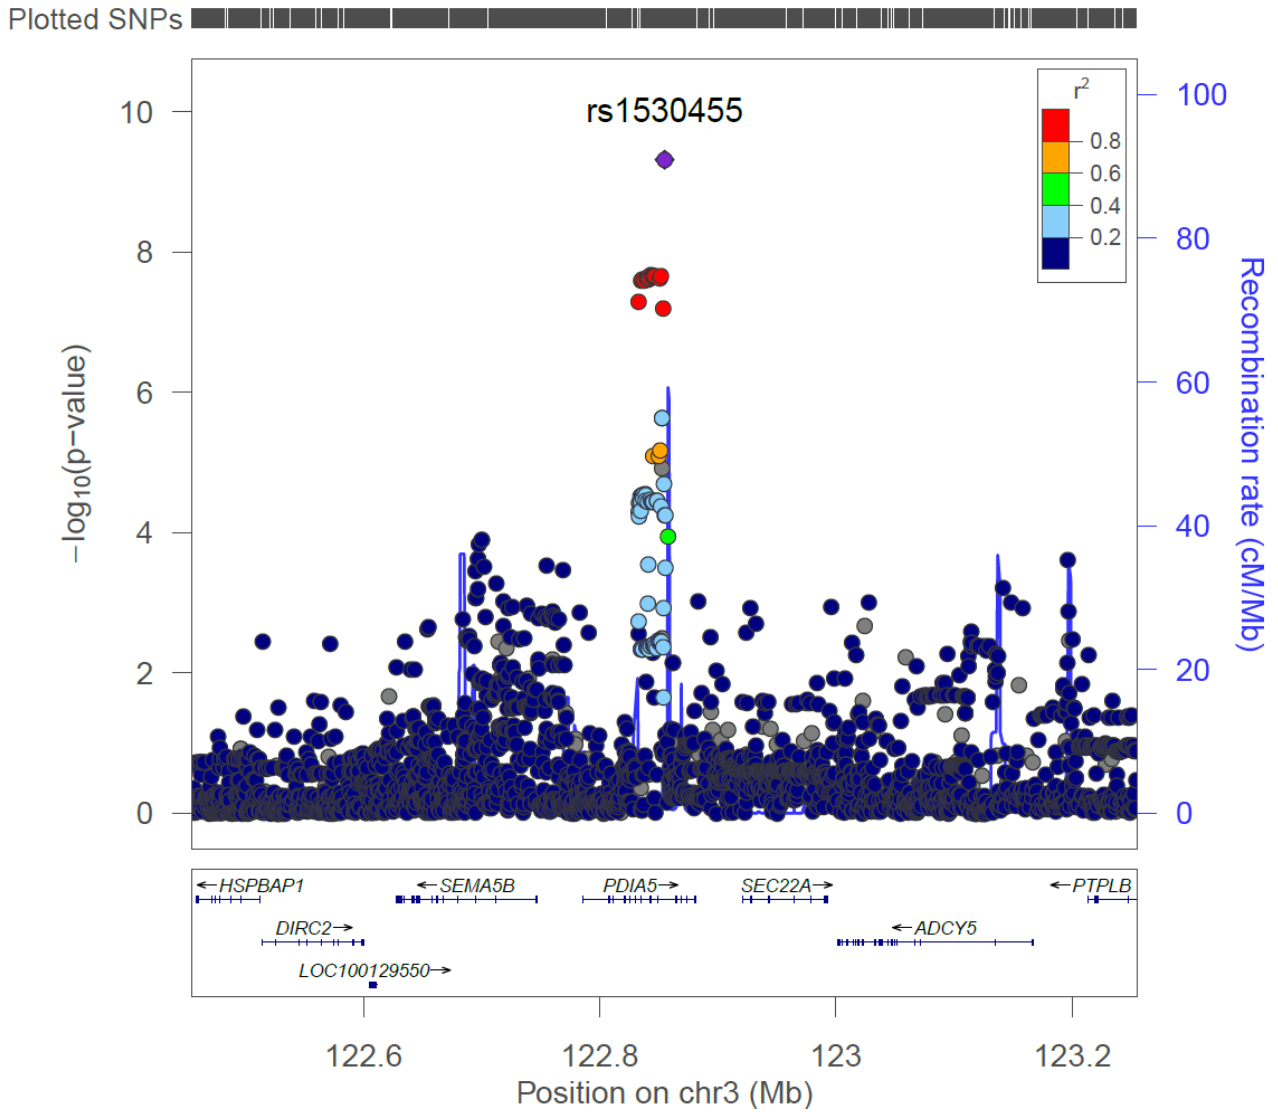

**Figure S49** Locus Zoom plot for interleukin-17 (IL-17) from 3q21.1.

# TRAIL - 3q26.31

Plotted SNPs

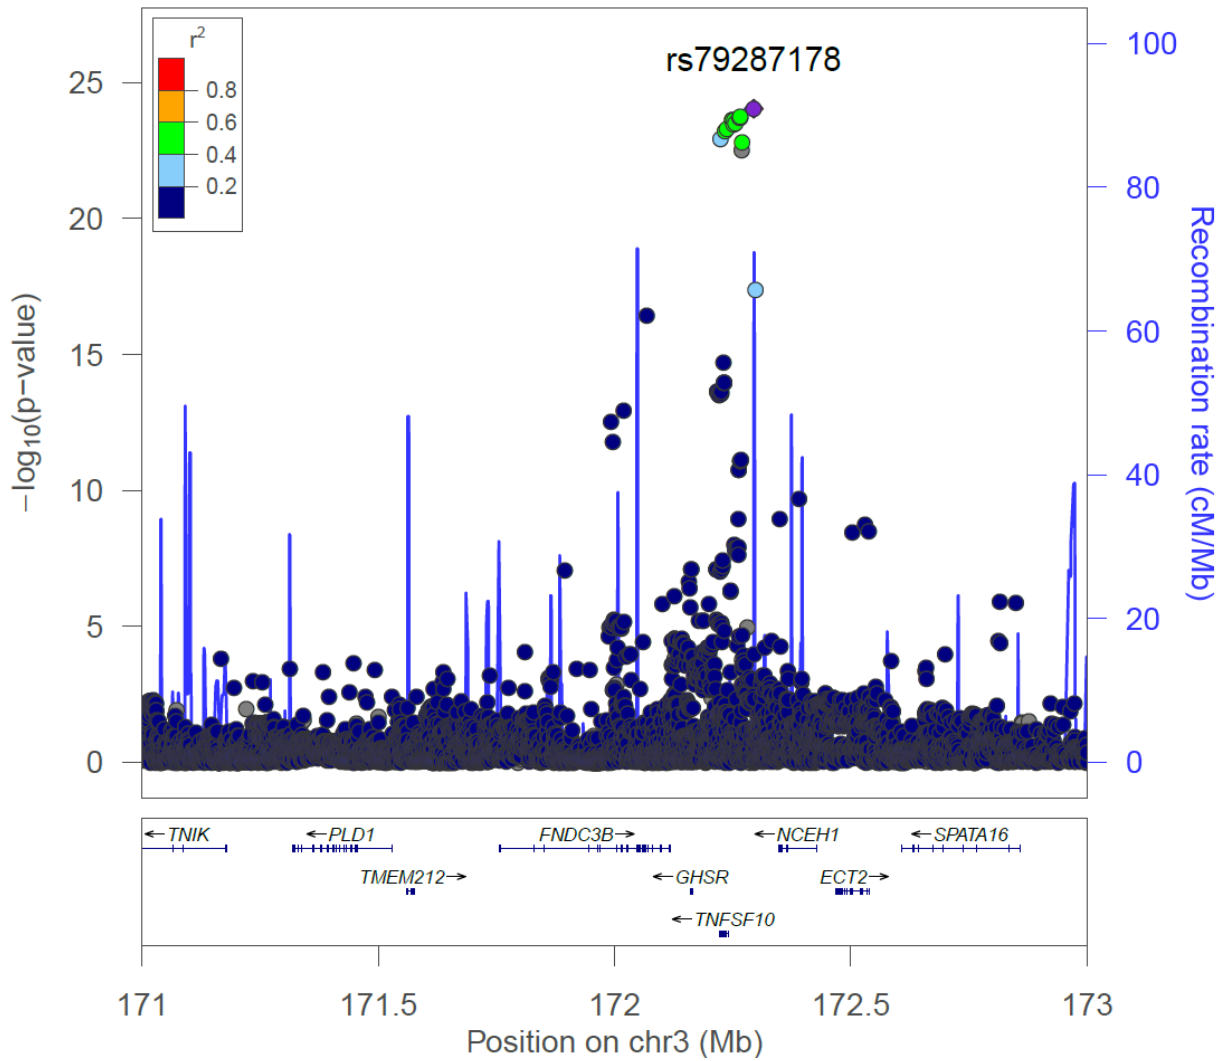

**Figure S50** Locus Zoom plot for TNF-related apoptosis inducing ligand (TRAIL) from 3q26.31.

# HGF - 4p16.3

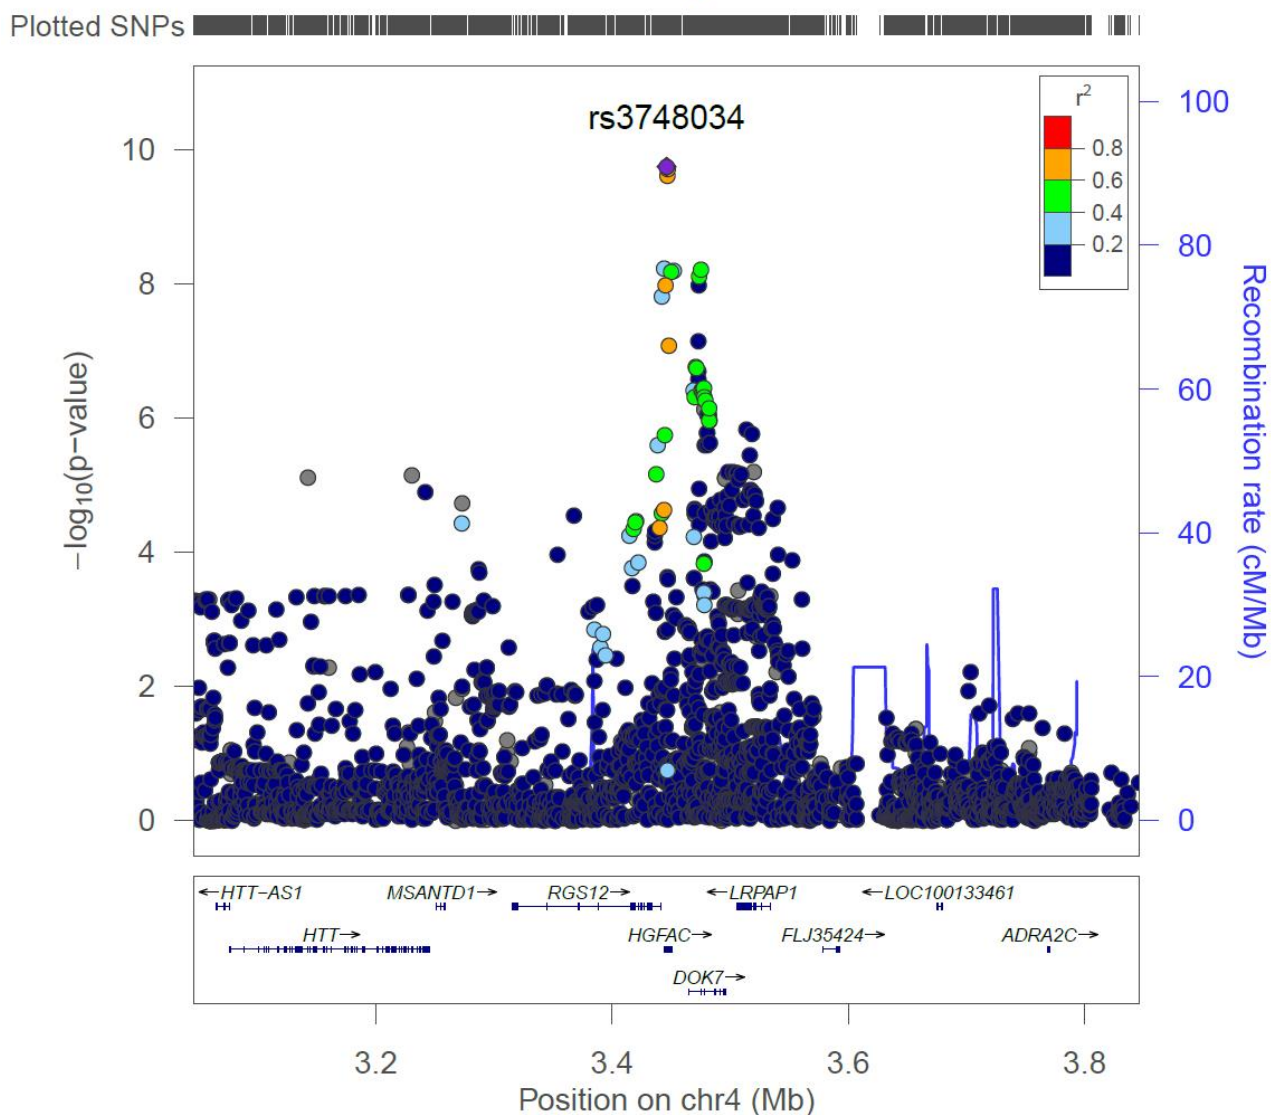

**Figure S51** Locus Zoom plot for hepatocyte growth factor (HGF) from 4p16.3.

# GROa - 4q13.3

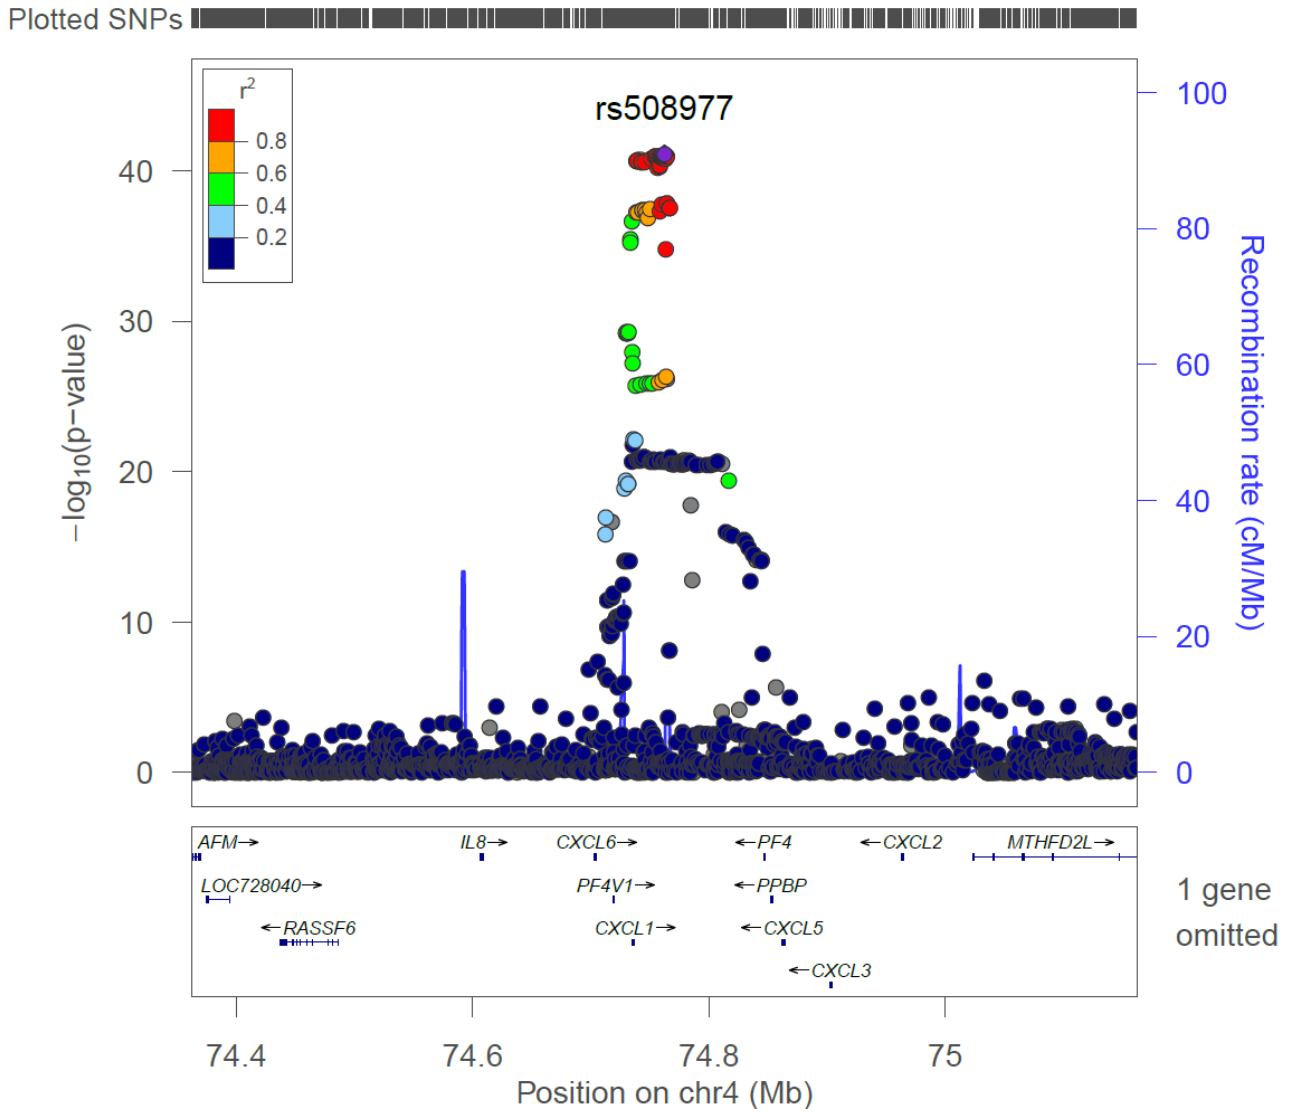

**Figure S52** Locus Zoom plot for growth regulated oncogene- $\alpha$  (GROa; CXCL1) from 4q13.3.

# IP10 – 4q21.1

Plotted SNPs

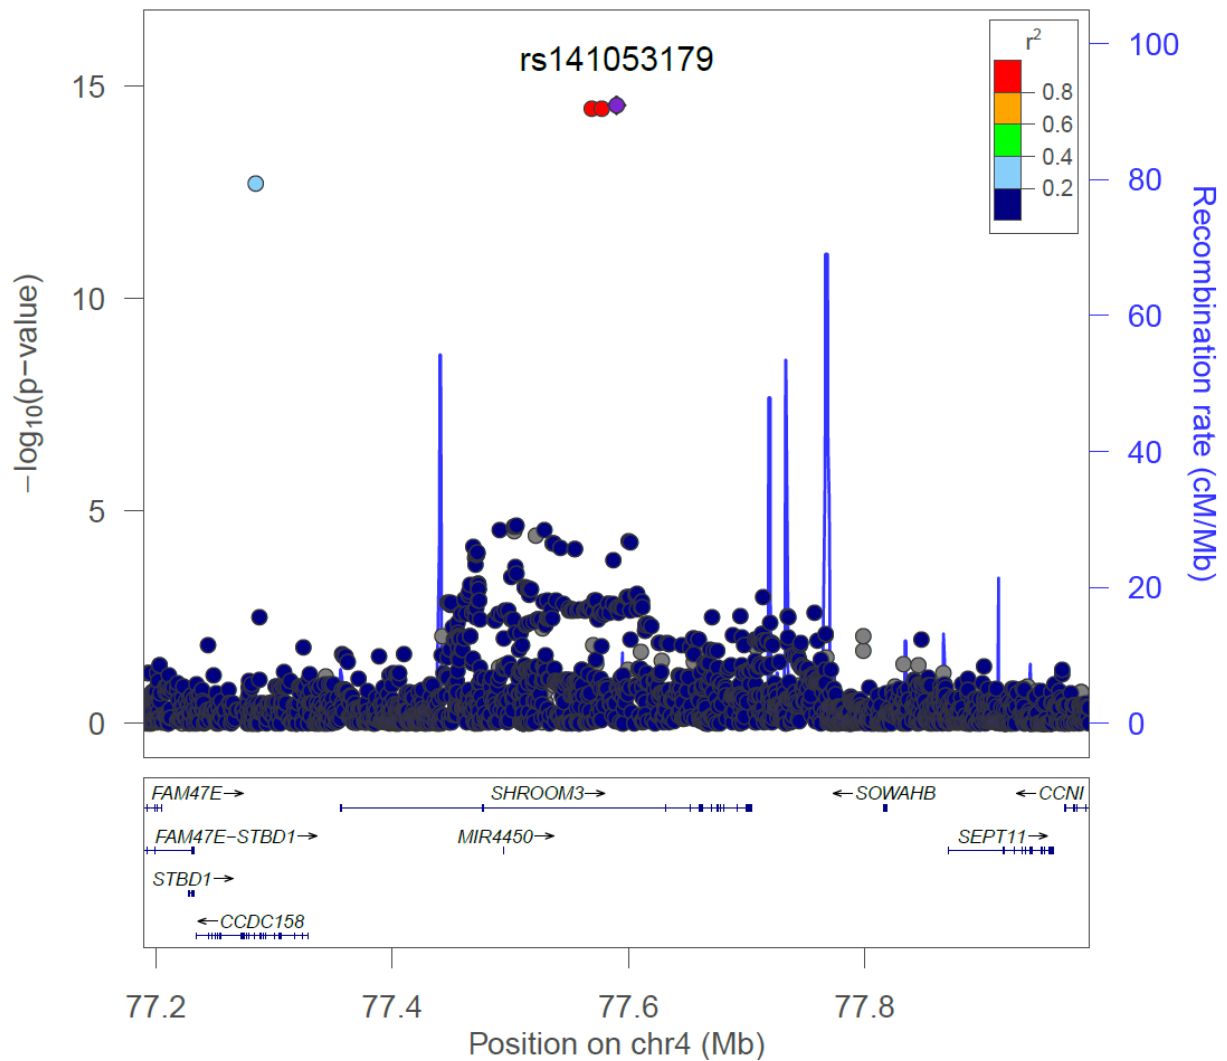

**Figure S53** Locus Zoom plot for interferon gamma-induced protein 10 (IP10; CXCL10) from 4q21.1.

# IL-18 – 5q13.2

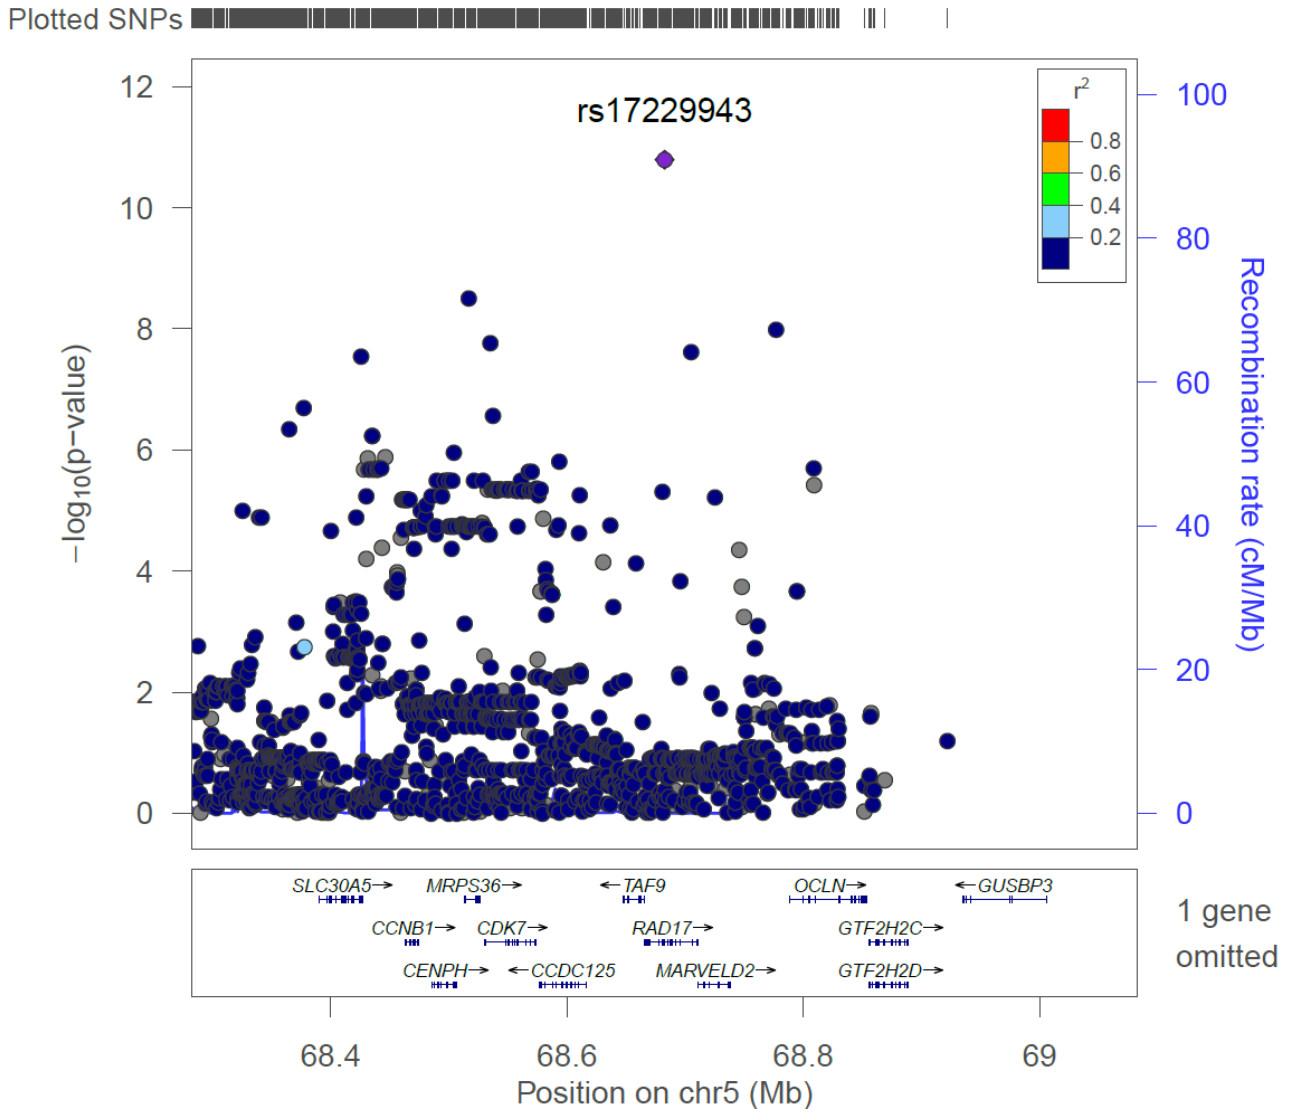

**Figure S54** Locus Zoom plot for interleukin-18 (IL-18) from 5q13.2.

# VEGF – 6p21.1

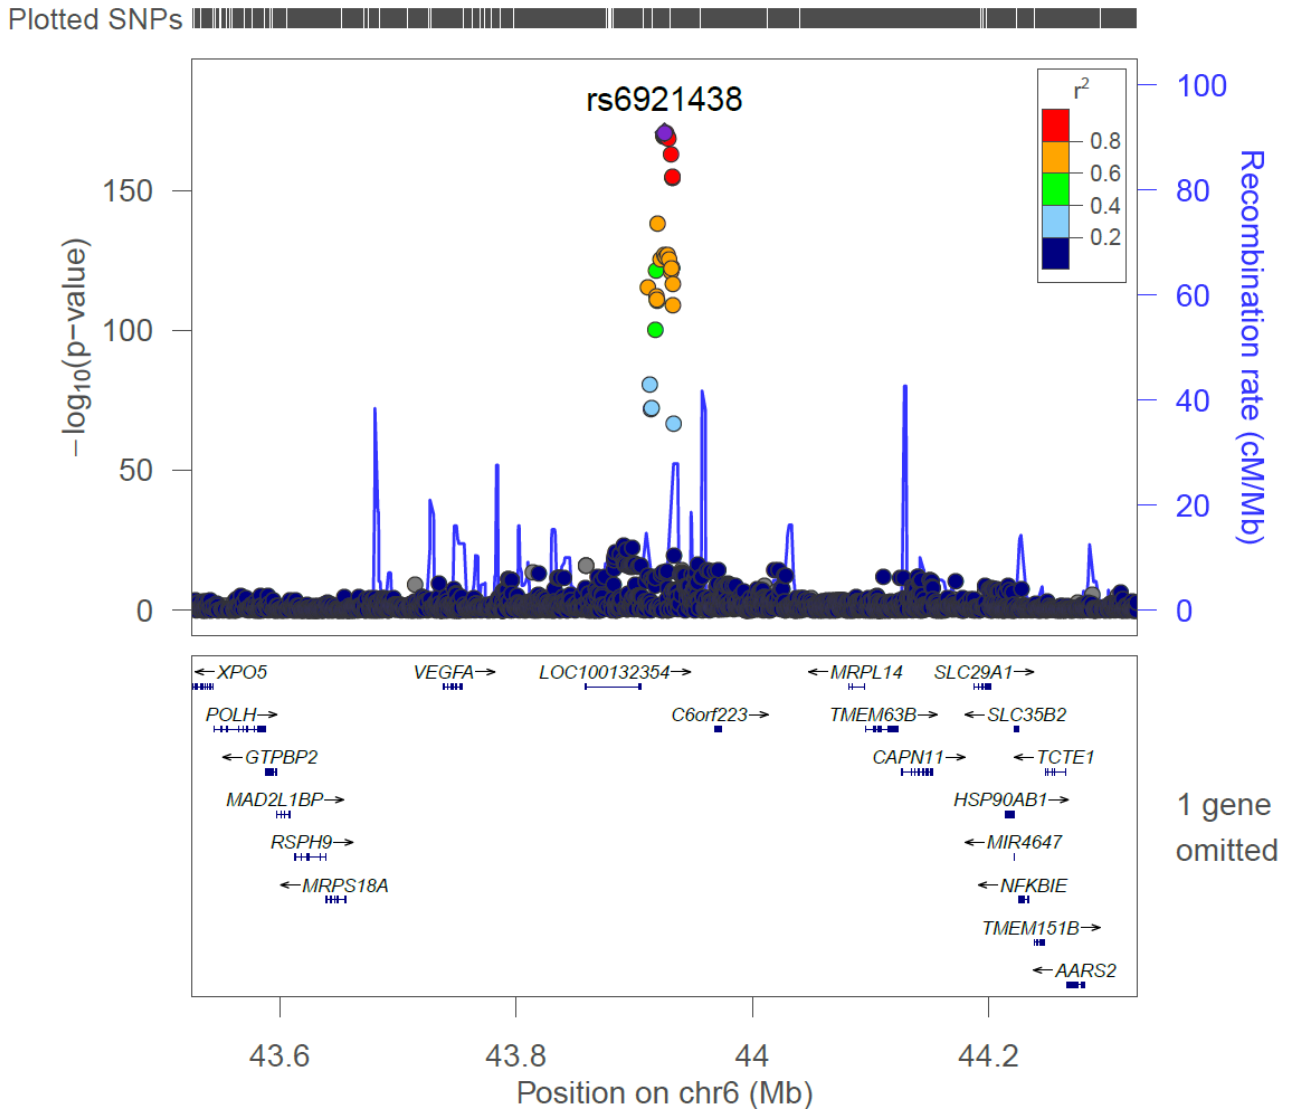

**Figure S55** Locus Zoom plot for vascular endothelial growth factor (VEGF) from 6p21.1



# HGF - 7q21.11

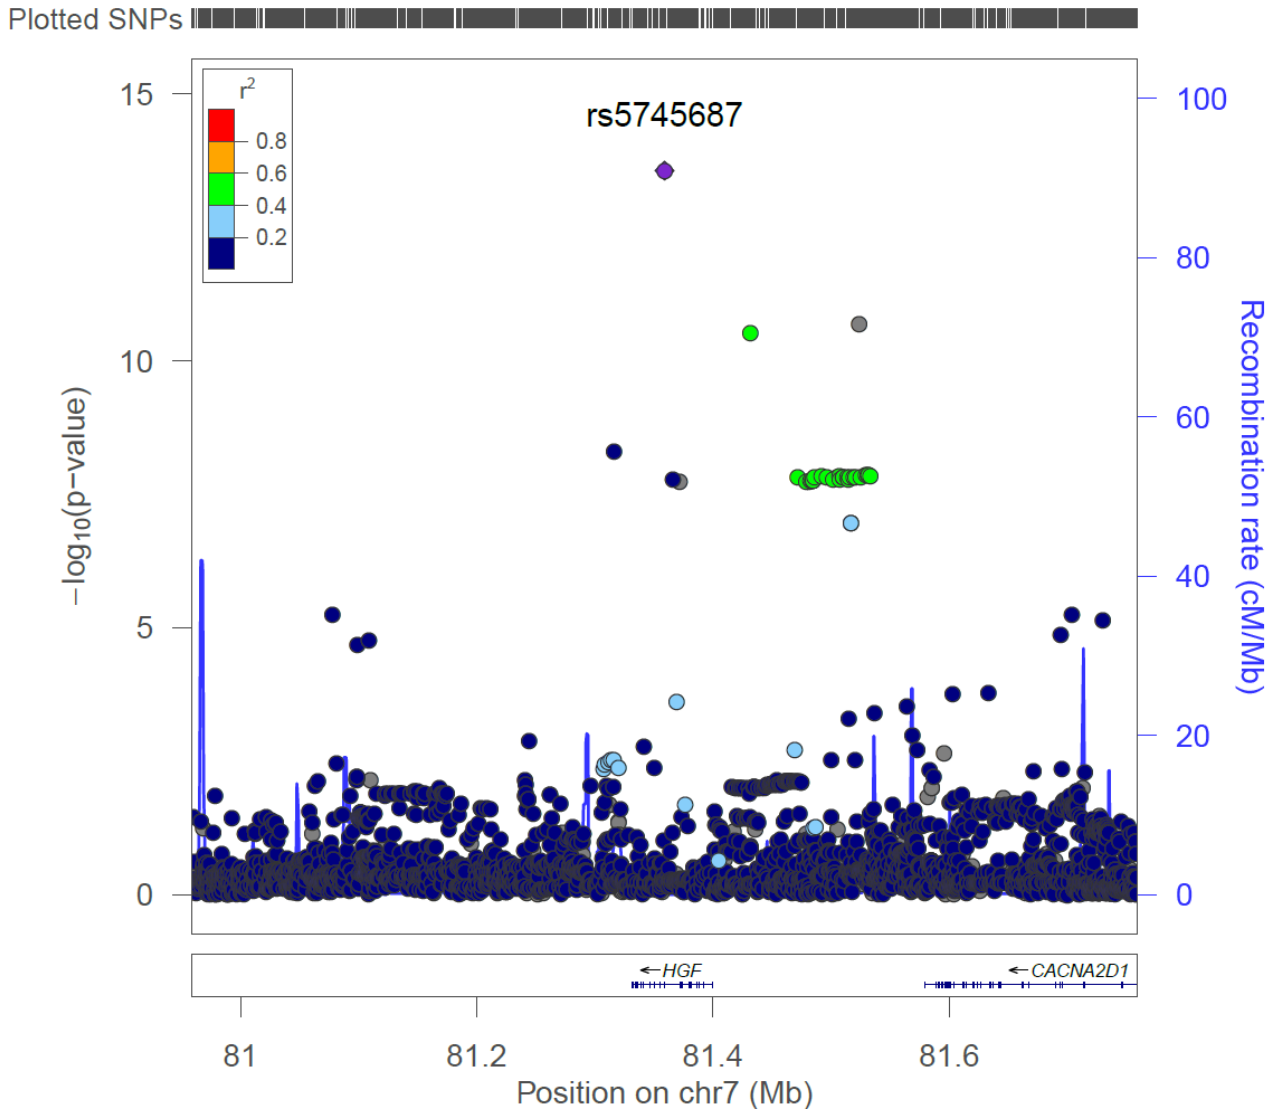

**Figure S56** Locus Zoom plot for hepatocyte growth factor (HGF) from 7q21.11.

# VEGF - 9p24.2

Plotted SNPs

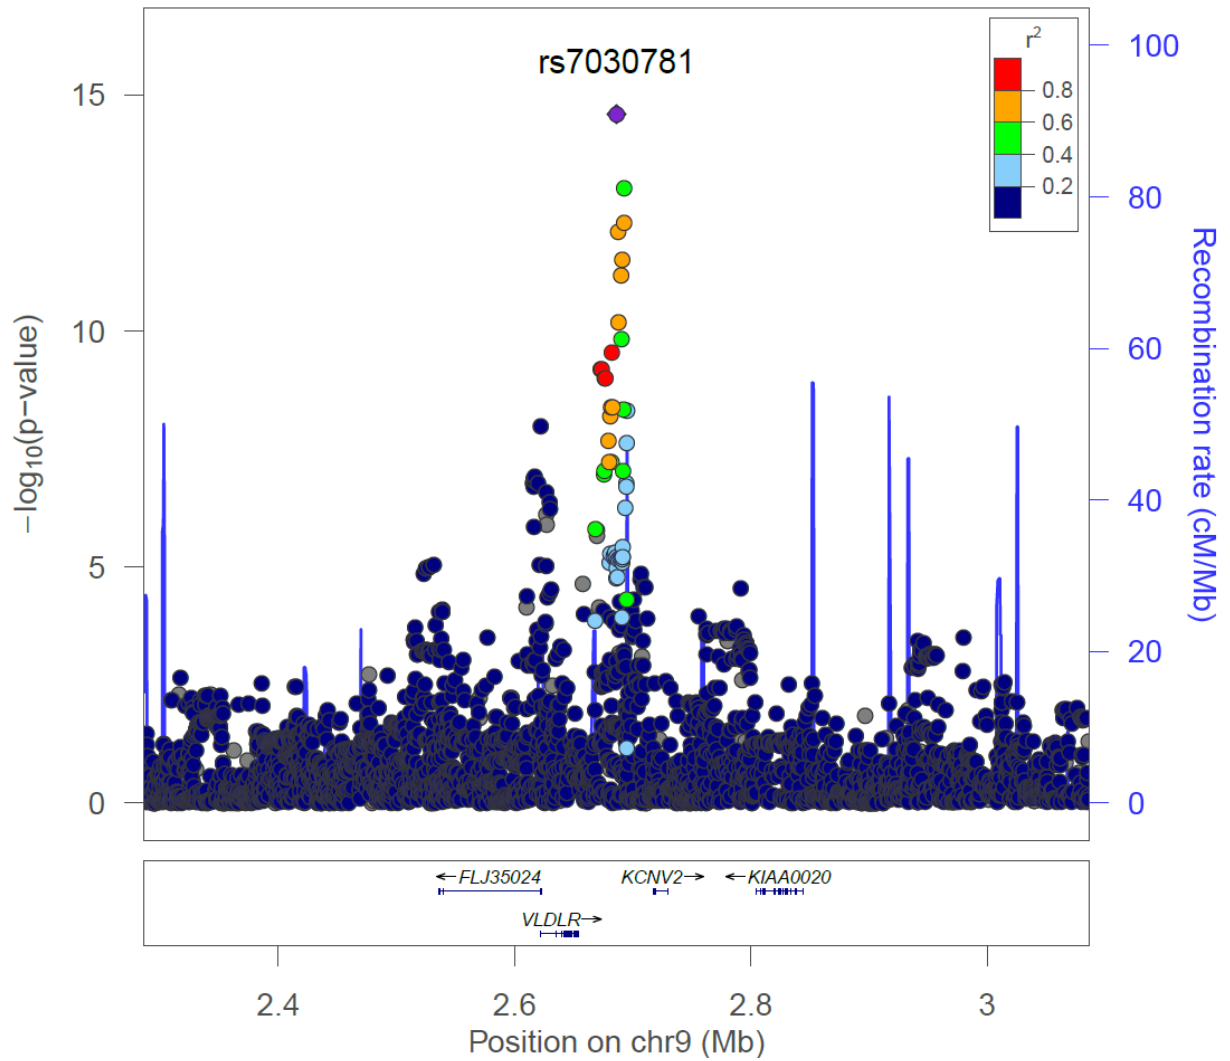

**Figure S57** Locus Zoom plot for vascular endothelial growth factor (VEGF) from 9p24.2.

# CTACK - 9p13.3

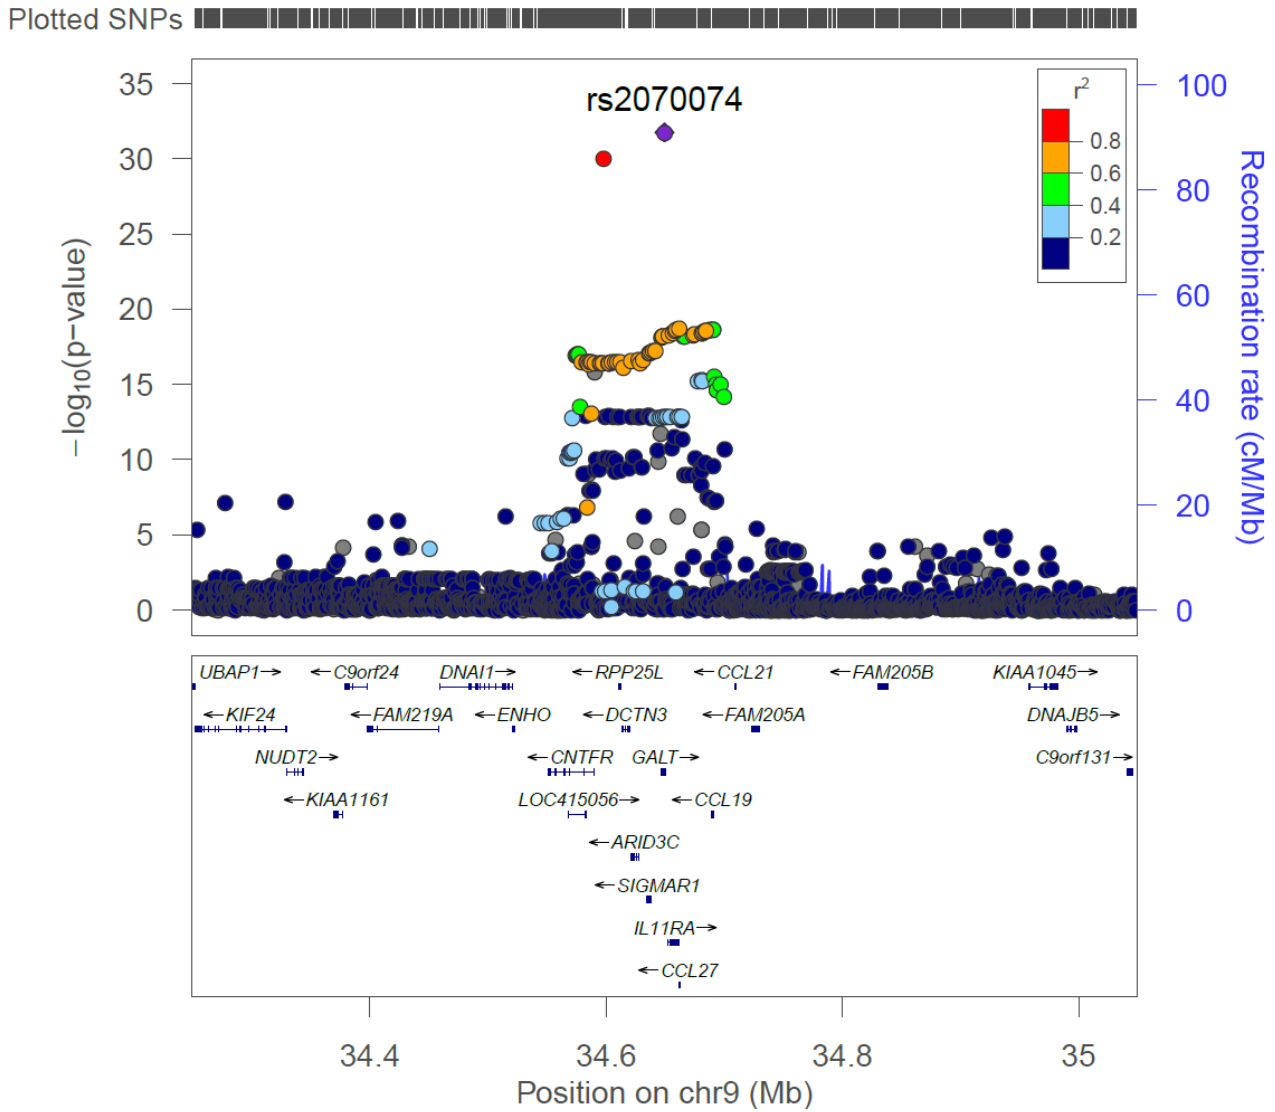

**Figure S58** Locus Zoom plot for cutaneous T-cell attracting (CTACK; CCL27).

# IL2ra - 10p15.1

Plotted SNPs

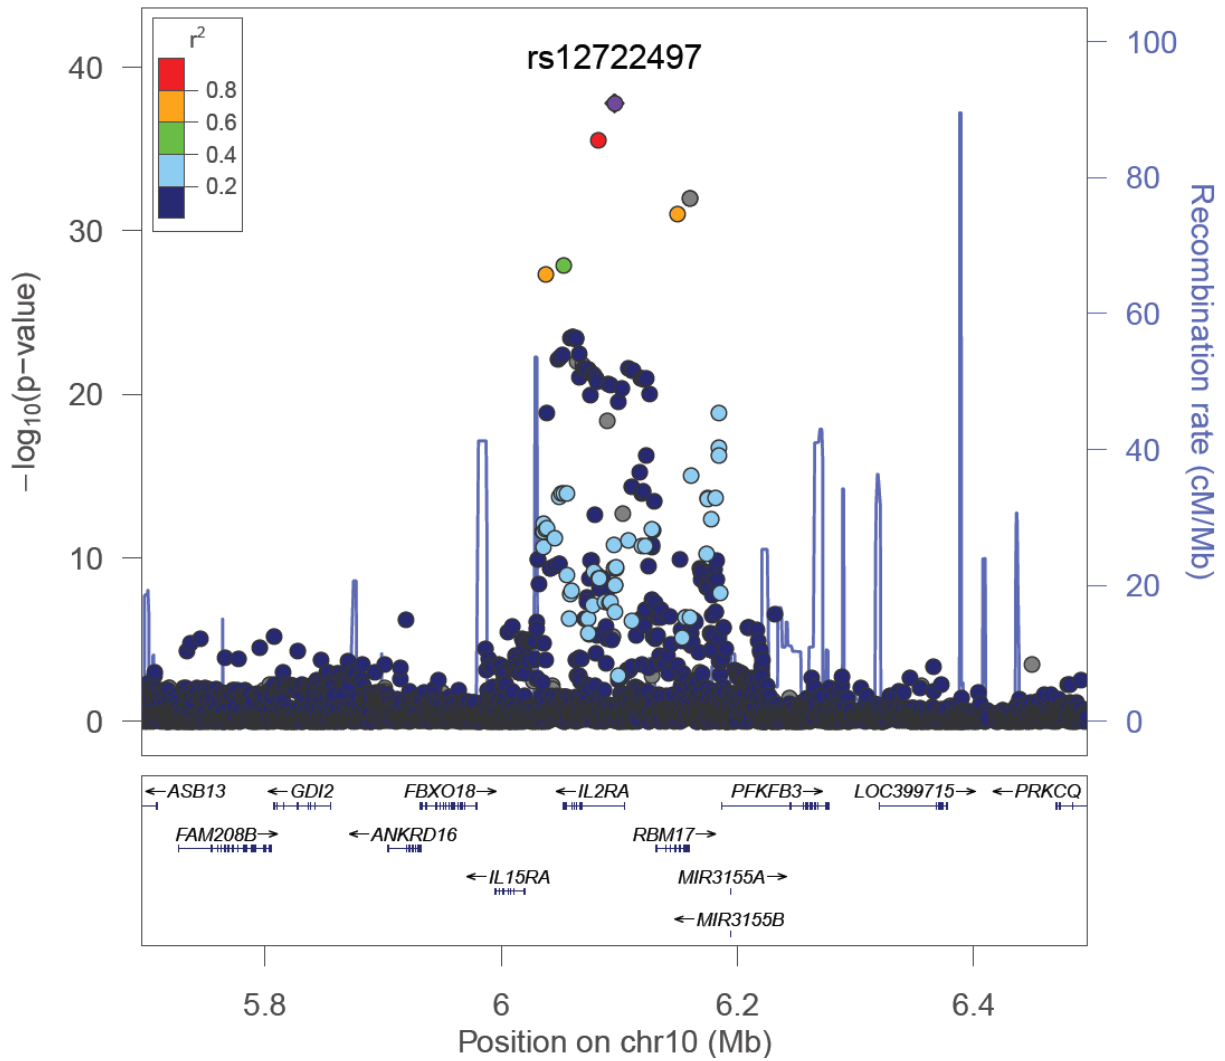

**Figure S59** Locus Zoom plot for interleukin-2 receptor subunit alpha (IL2ra) from 10p15.1.

# VEGF - 10q21.3

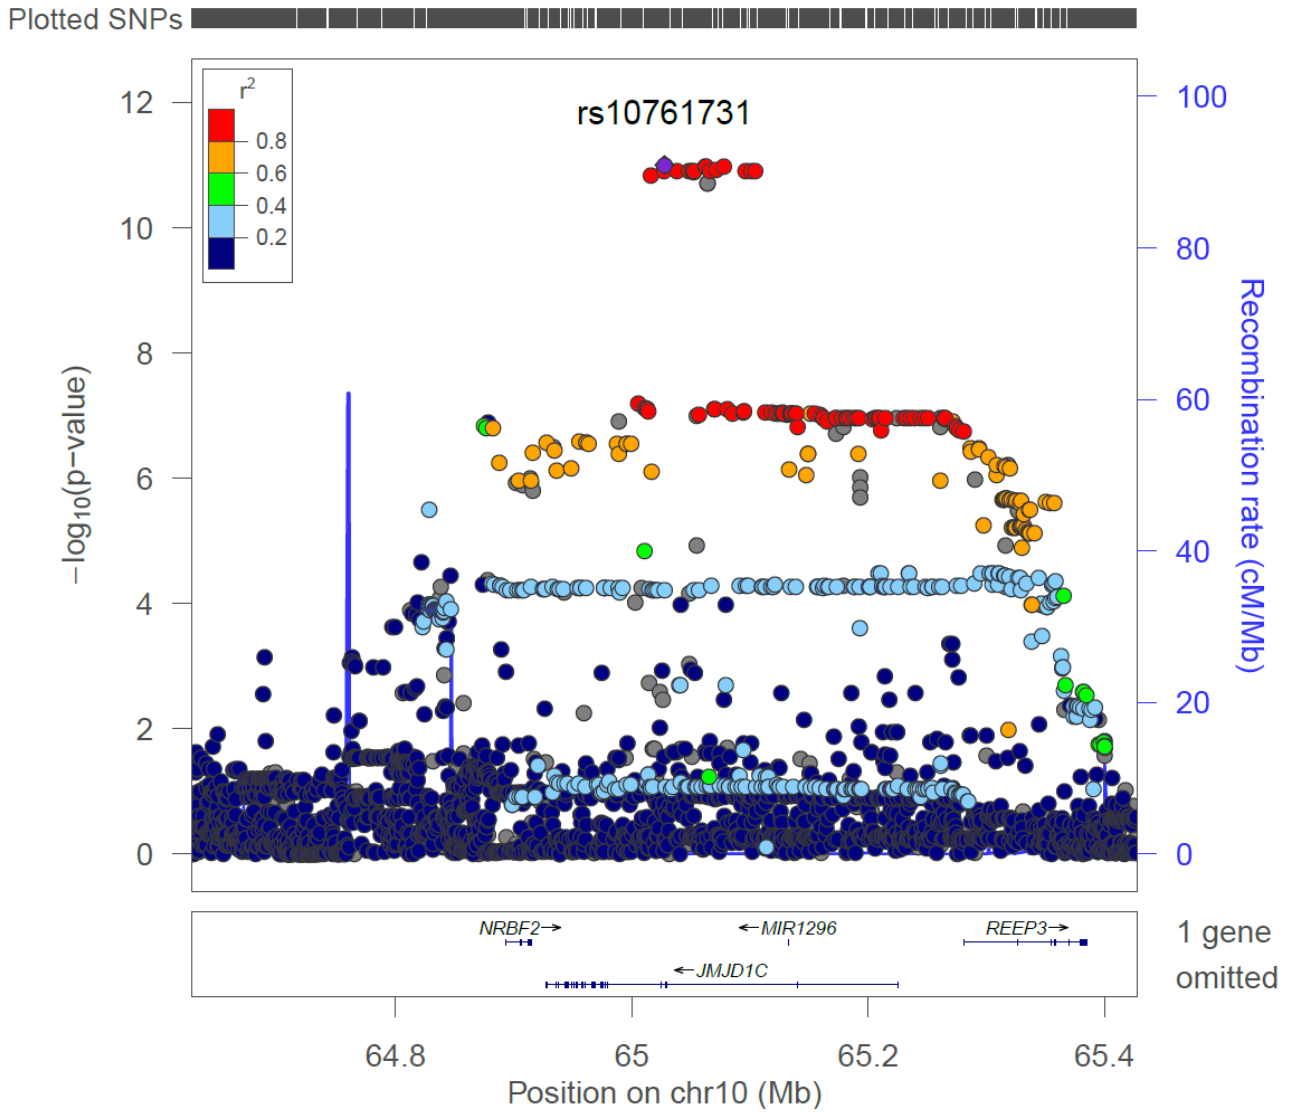

**Figure S60** Locus Zoom plot for vascular endothelial growth factor (VEGF) from 10q21.3.

# IL-18 – 11q23.1

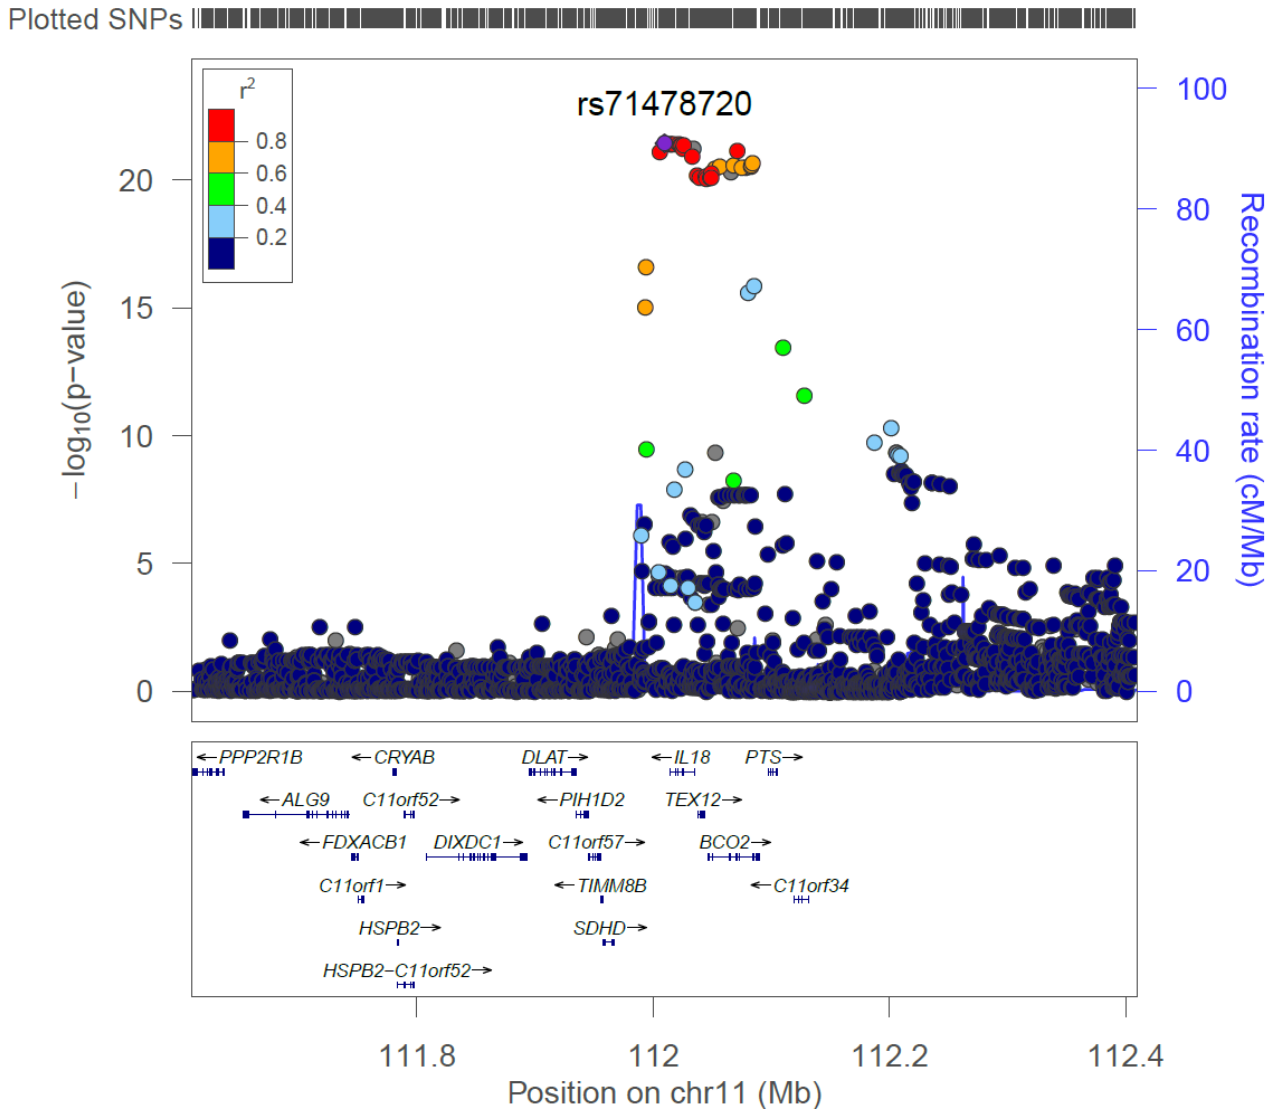

**Figure S61** Locus Zoom plot for interleukin-18 (IL-18) from 11q23.1.

# SCGFb – 12q23.3

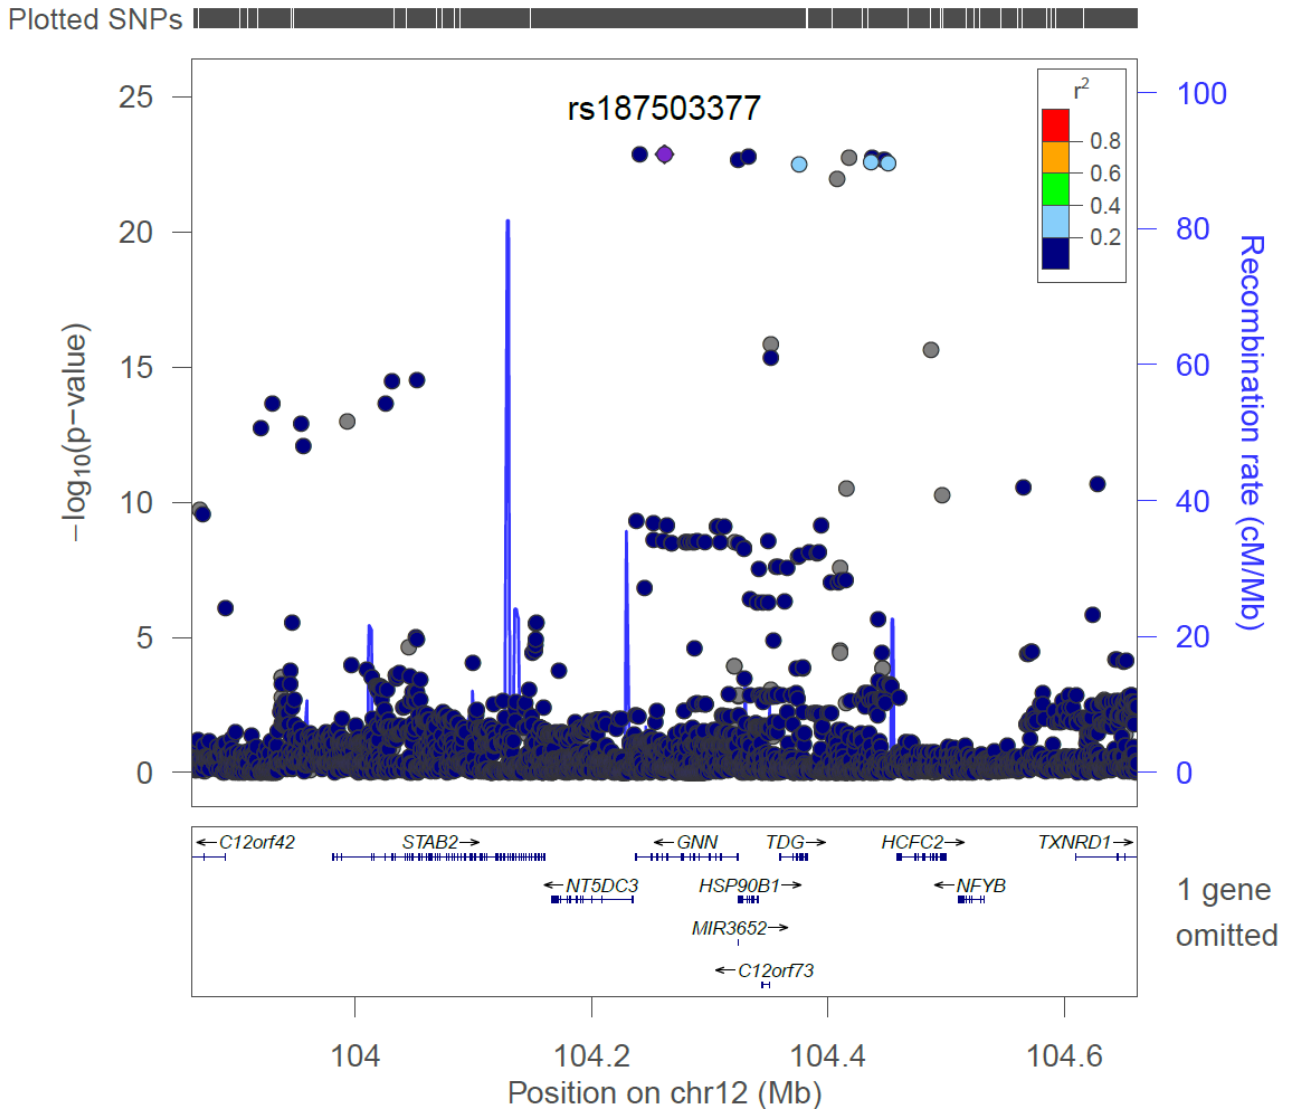

**Figure S62** Locus Zoom plot for stem cell growth factor beta (SCGFb) from 12q23.3.

# IL-16 – 15q25.1

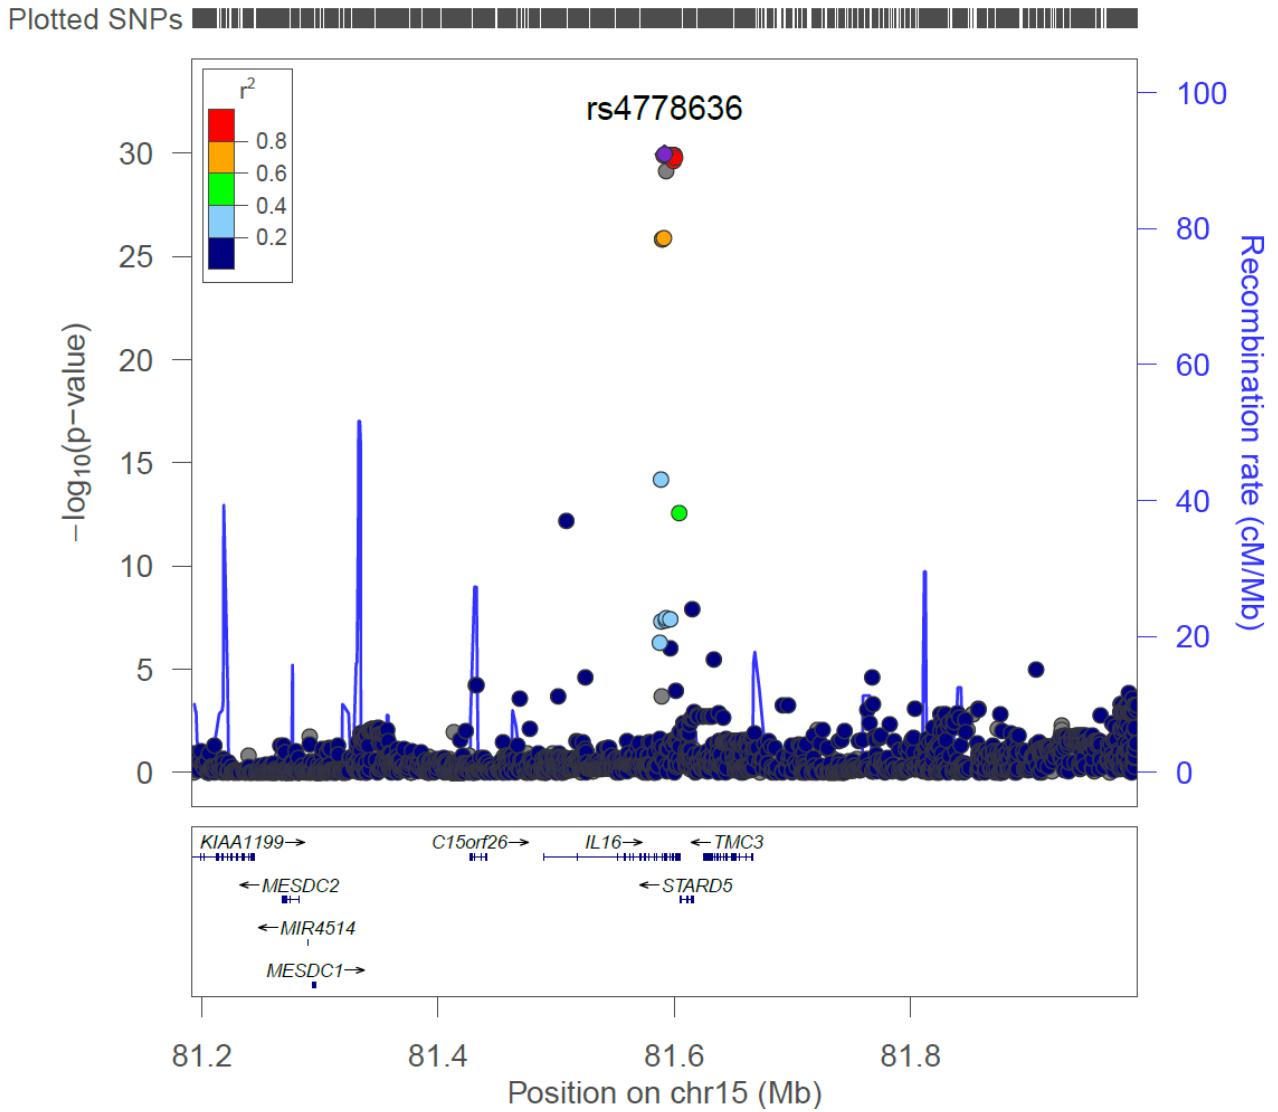

**Figure S63** Locus zoom plot for interleukin-16 (IL-16) from 15q25.1.



# PDGFbb – 15q26.3

Plotted SNPs

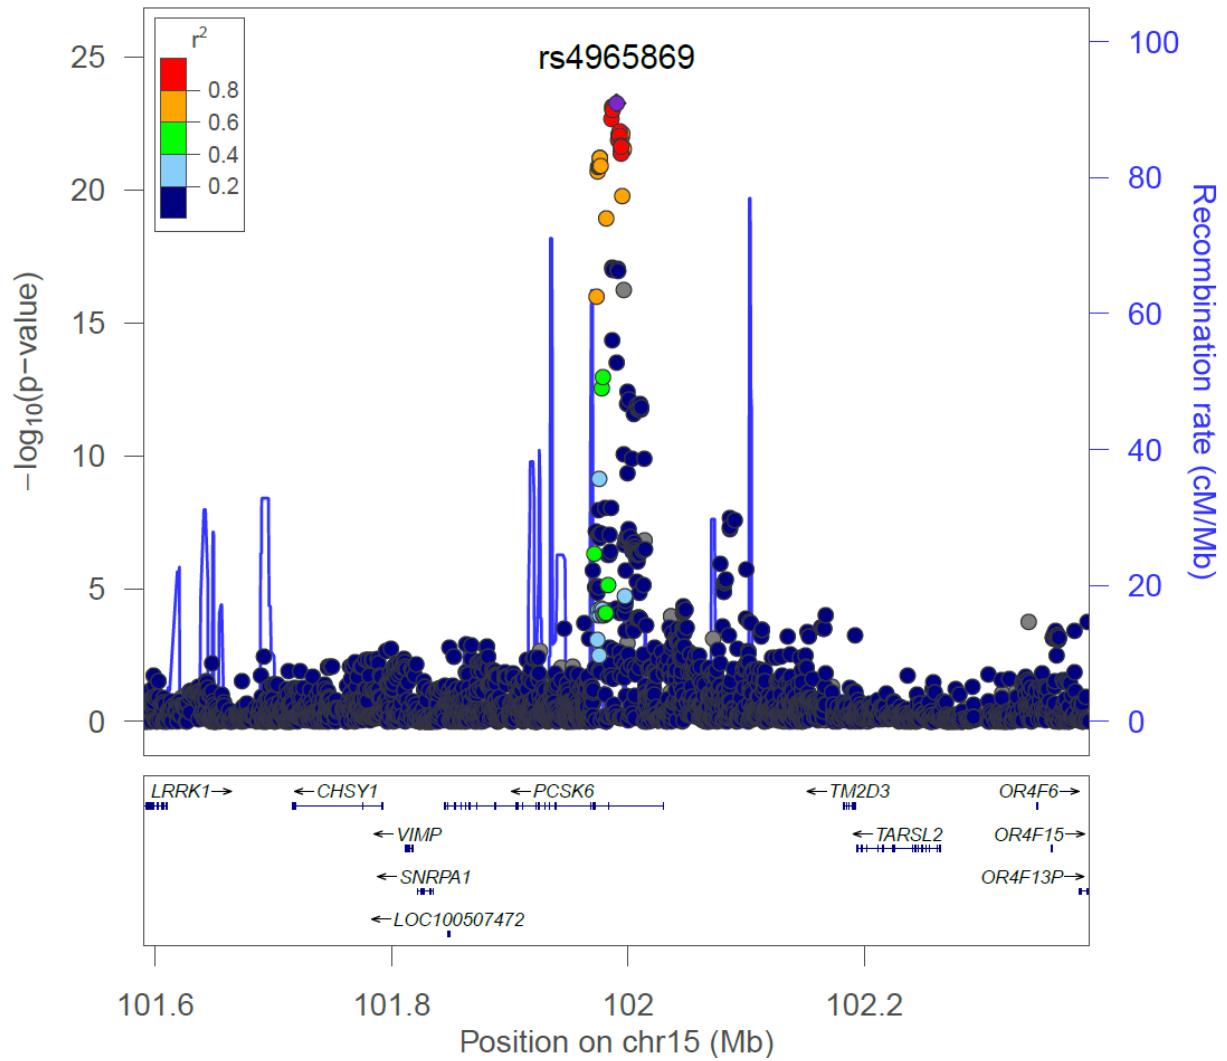

**Figure S64** Locus Zoom plot for platelet derived growth factor BB (PDGFbb) from 15q26.3.

# MIP1b - 17q12

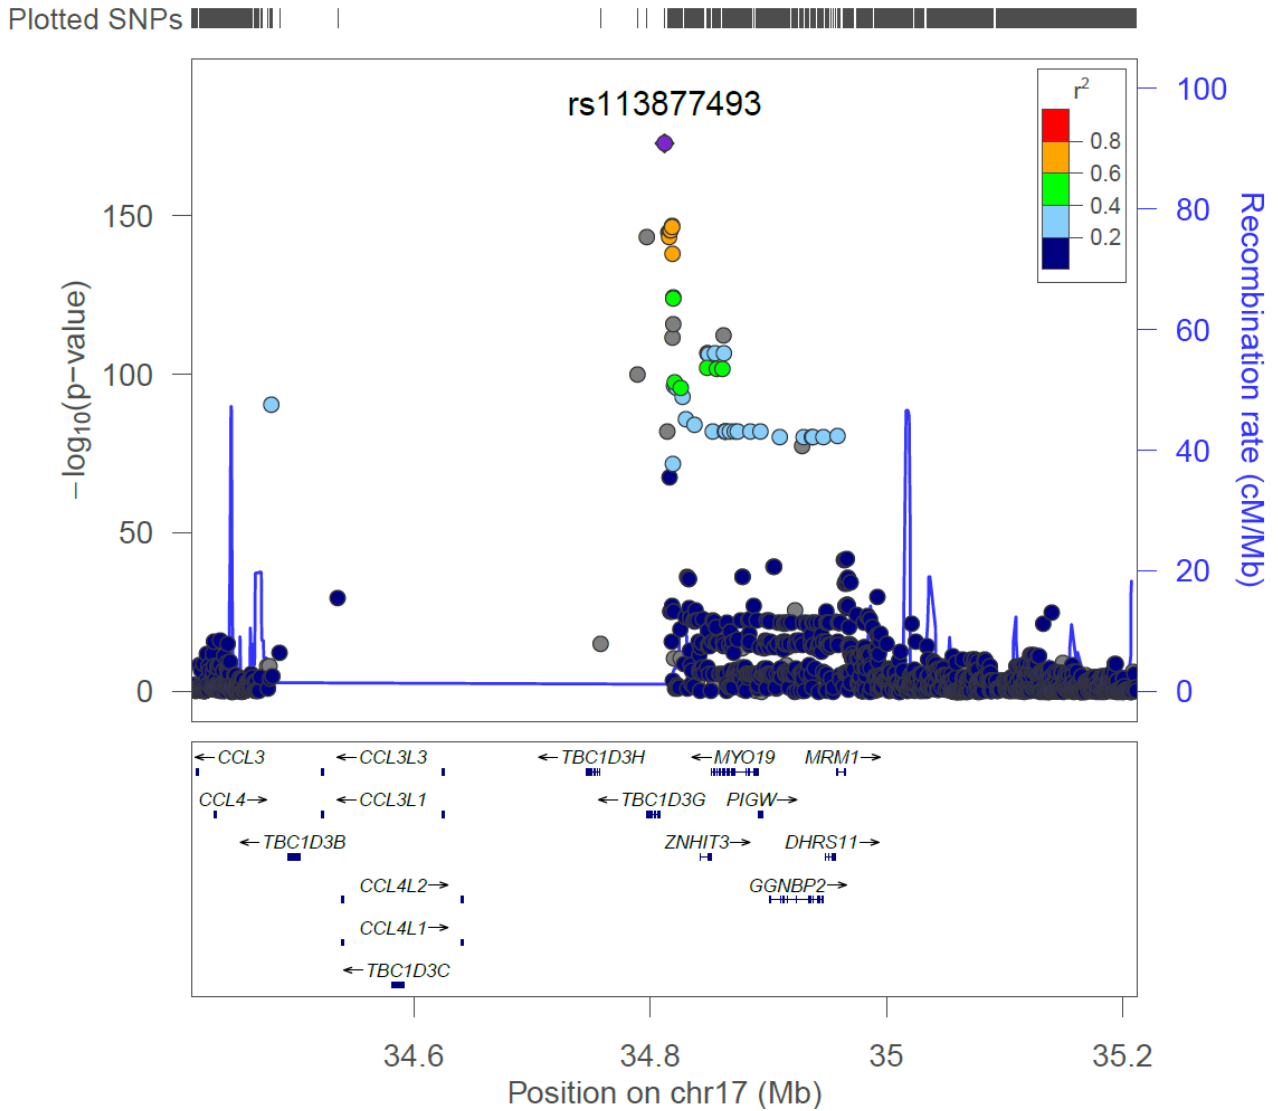

**Figure S65** Locus Zoom plot from macrophage inflammatory protein-1 $\beta$  (MIP1b; CCL4) from 17q12.

# TRAIL - 18q12.1

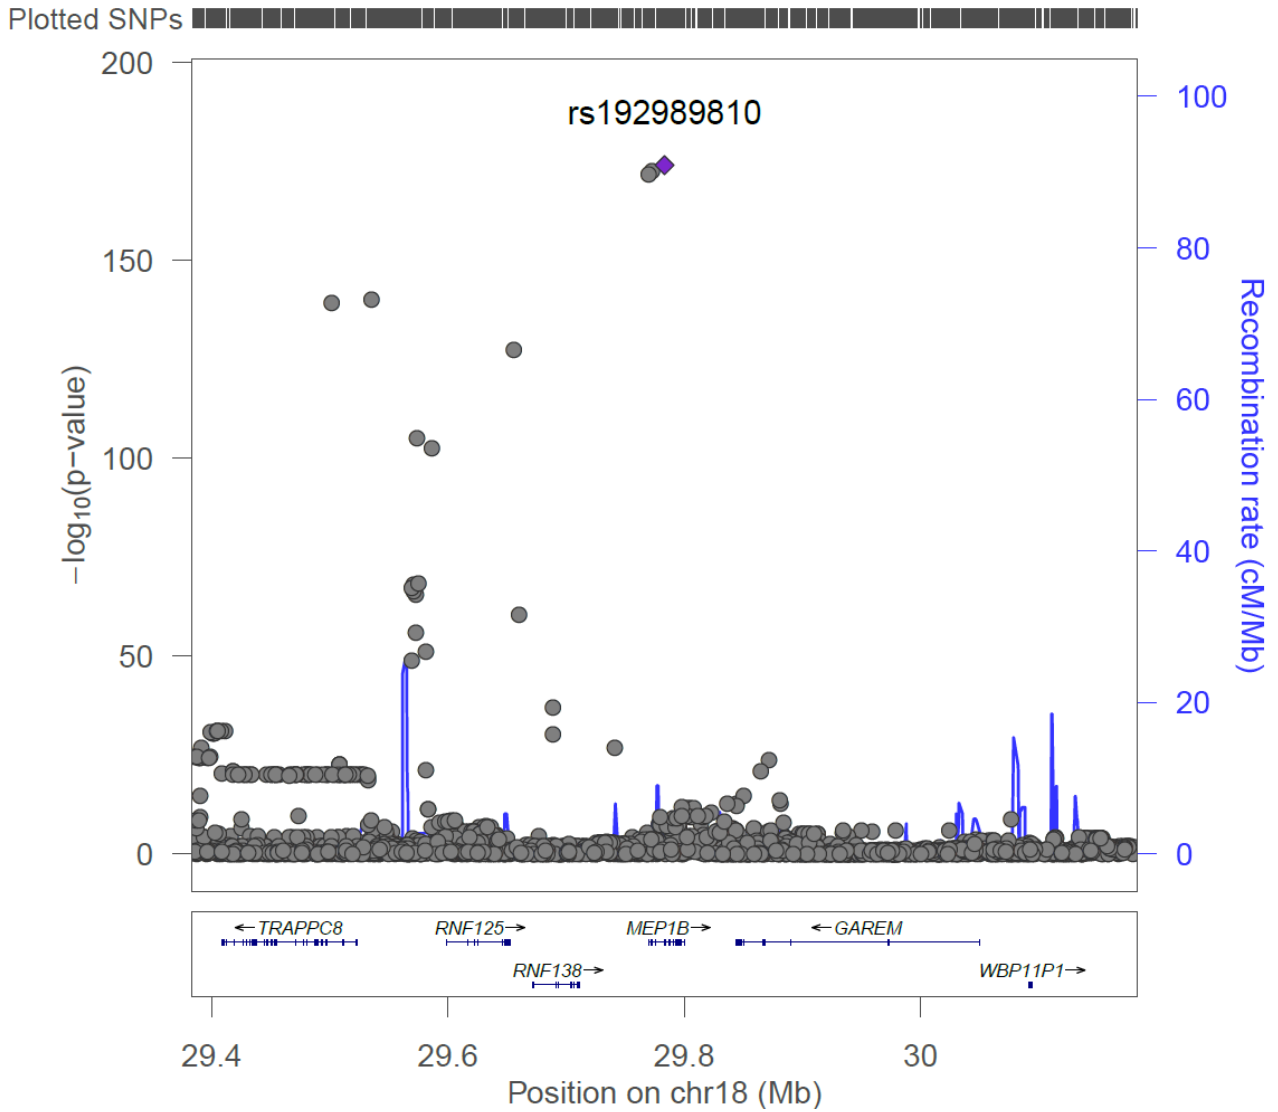

**Figure S66** Locus Zoom plot for TNF-related apoptosis inducing ligand (TRAIL) from 18q12.1.

# SCGFb – 19q13.33

Plotted SNPs

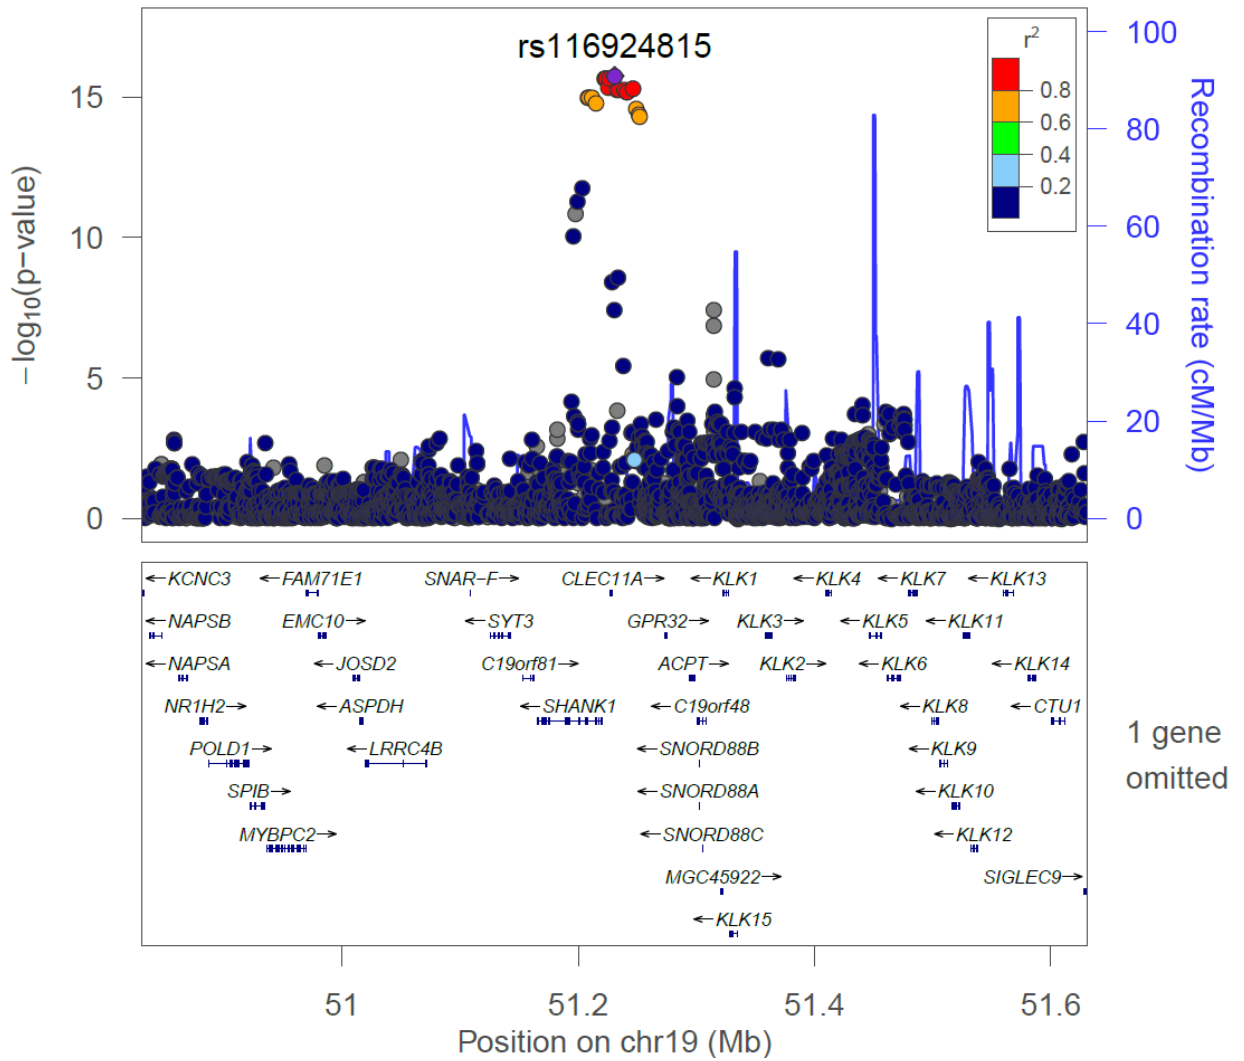

**Figure S67** Locus Zoom plot for stem cell growth factor beta (SCGFb) from 19q13.33.

# MIF – 22q11.23

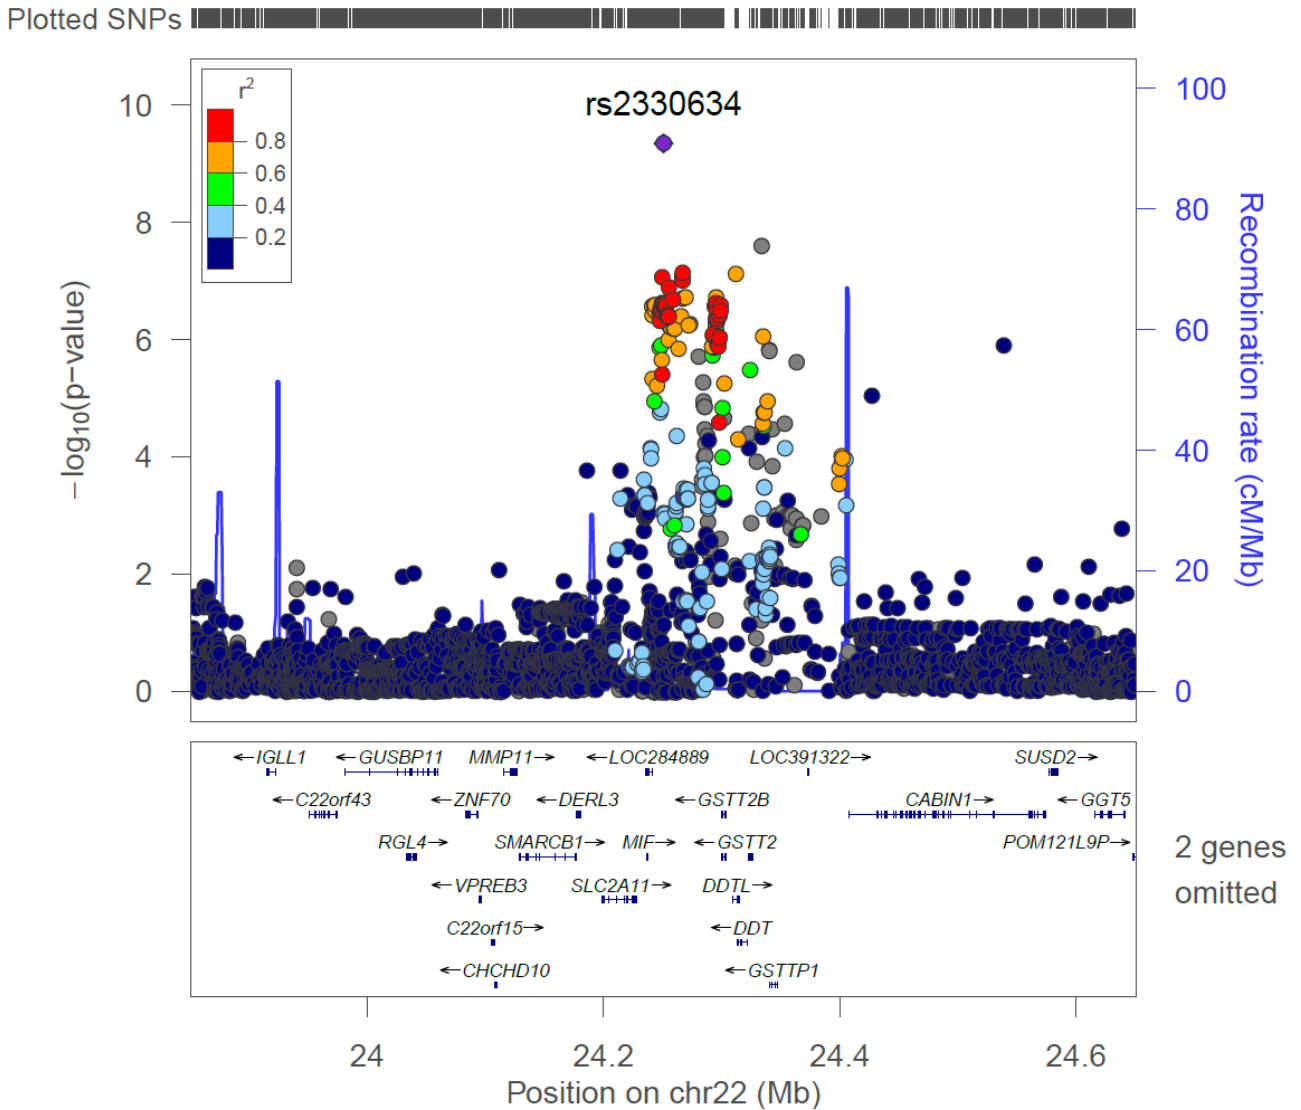

**Figure S68** Locus Zoom plot for macrophage migration inhibitory factor (glycosylation-inhibiting factor; MIF) from 22q11.23.

# CTACK – 22q13.31

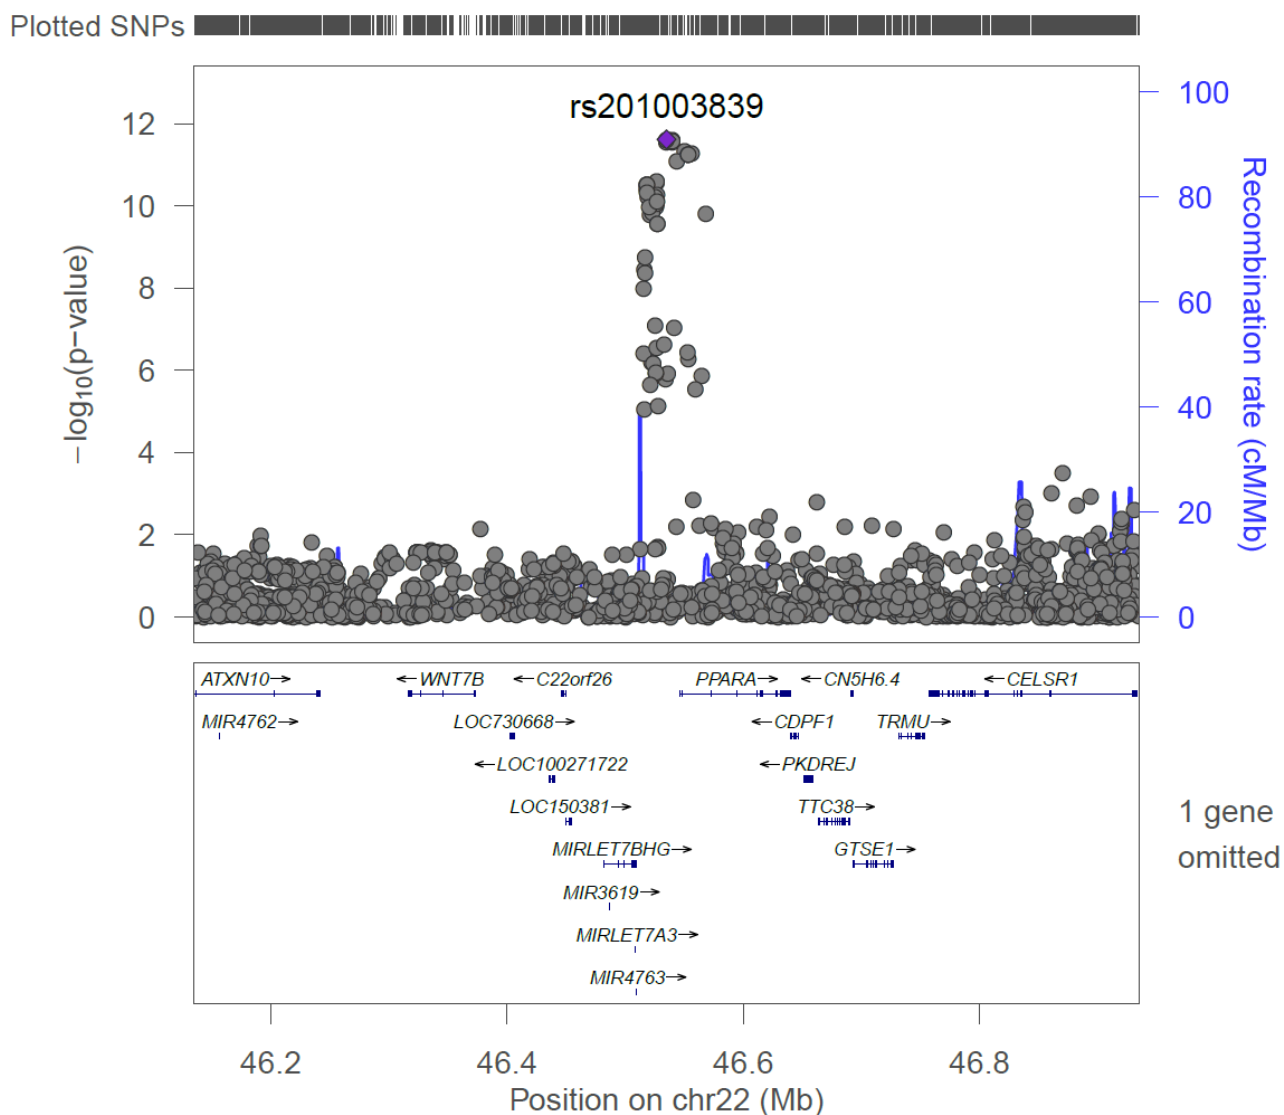

**Figure S69** Locus Zoom plot for Cutaneous T-cell attracting (CTACK; CCL27) from 22q13.31.

## QQ-plot for bNGF

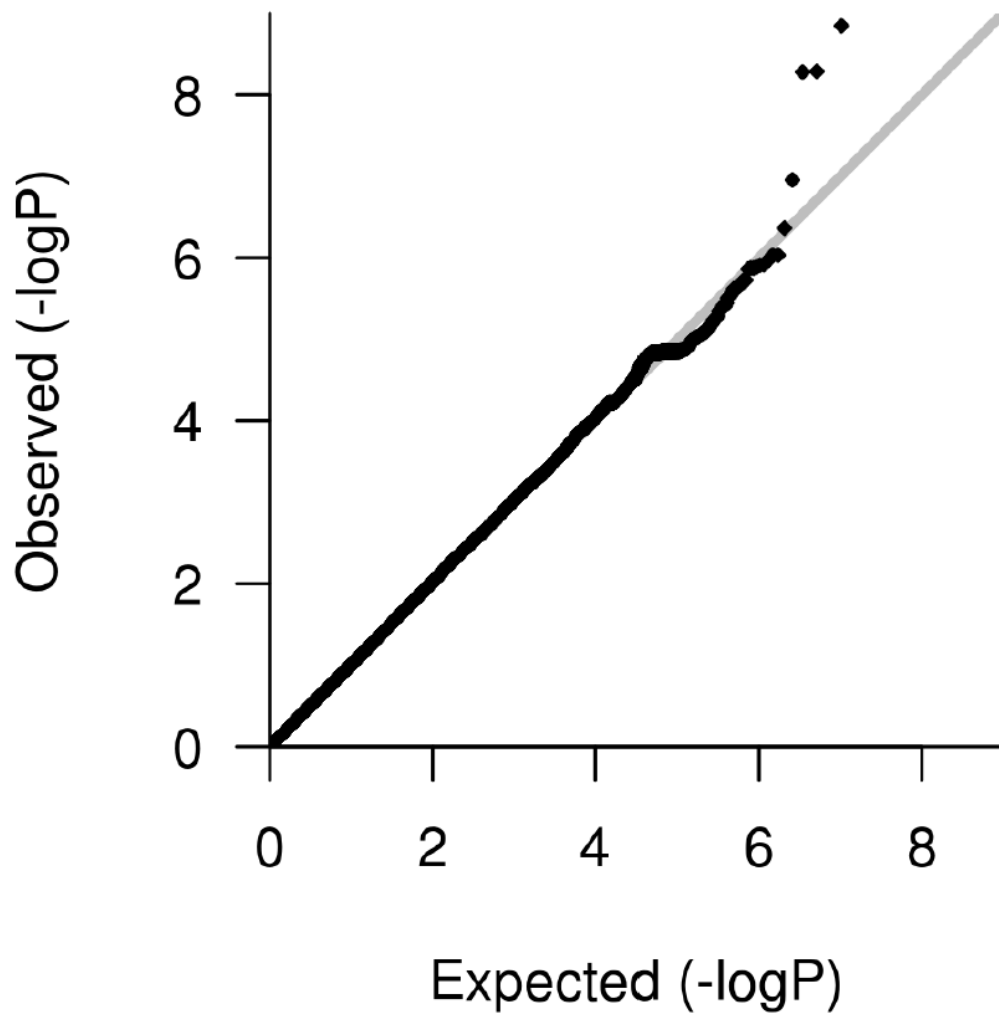

**Figure S70** QQ-plot for beta nerve growth factor (bNGF).

## QQ-plot for CTACK

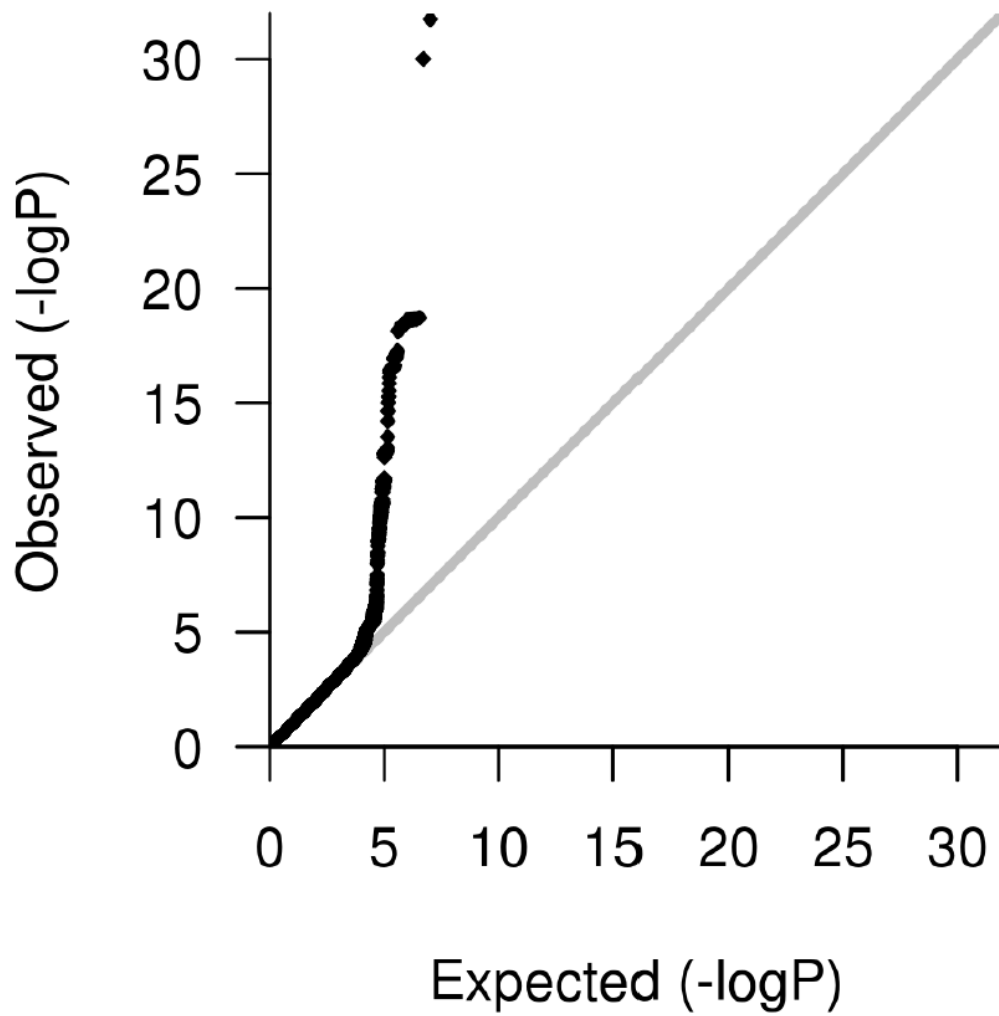

**Figure S71** QQ-plot for cutaneous T-cell attracting (CTACK; CCL27).



## QQ-plot for Eotaxin

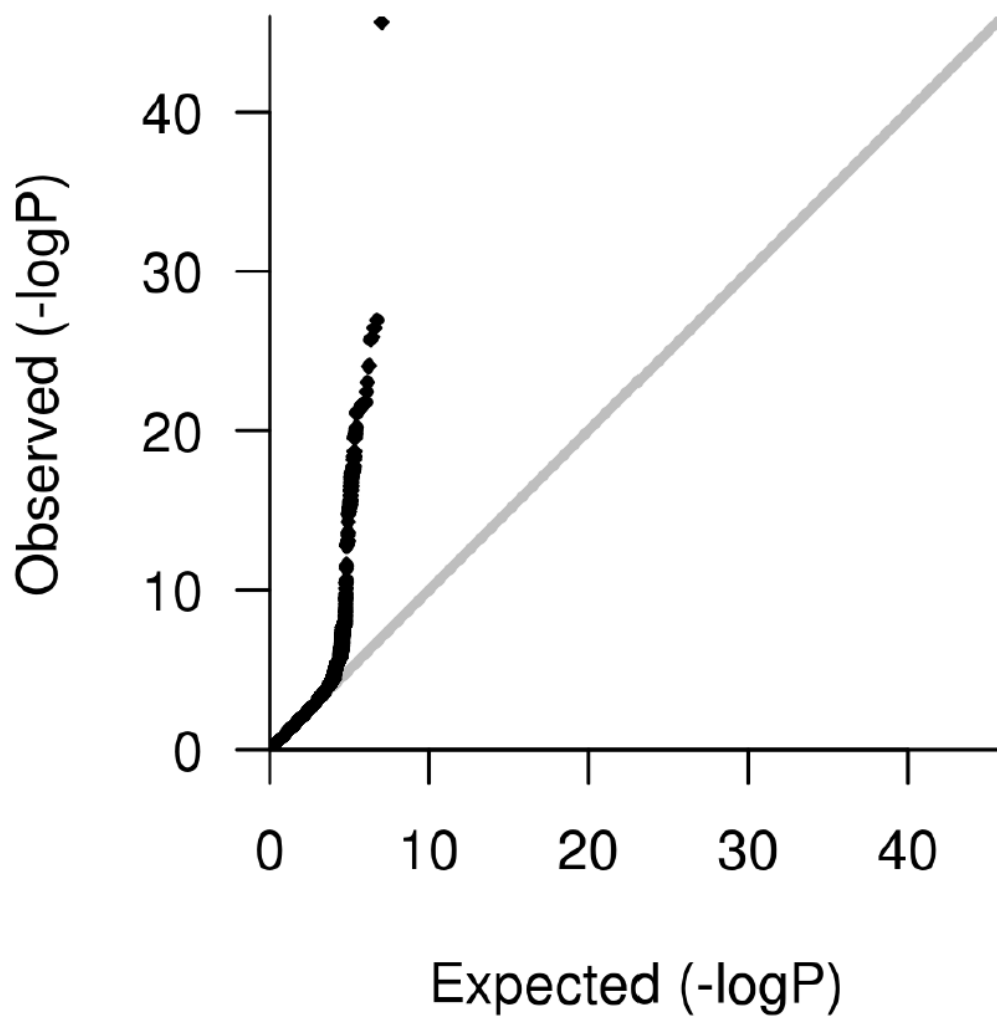

Figure S72 QQ-plot for eotaxin.

## QQ-plot for FGFbasic

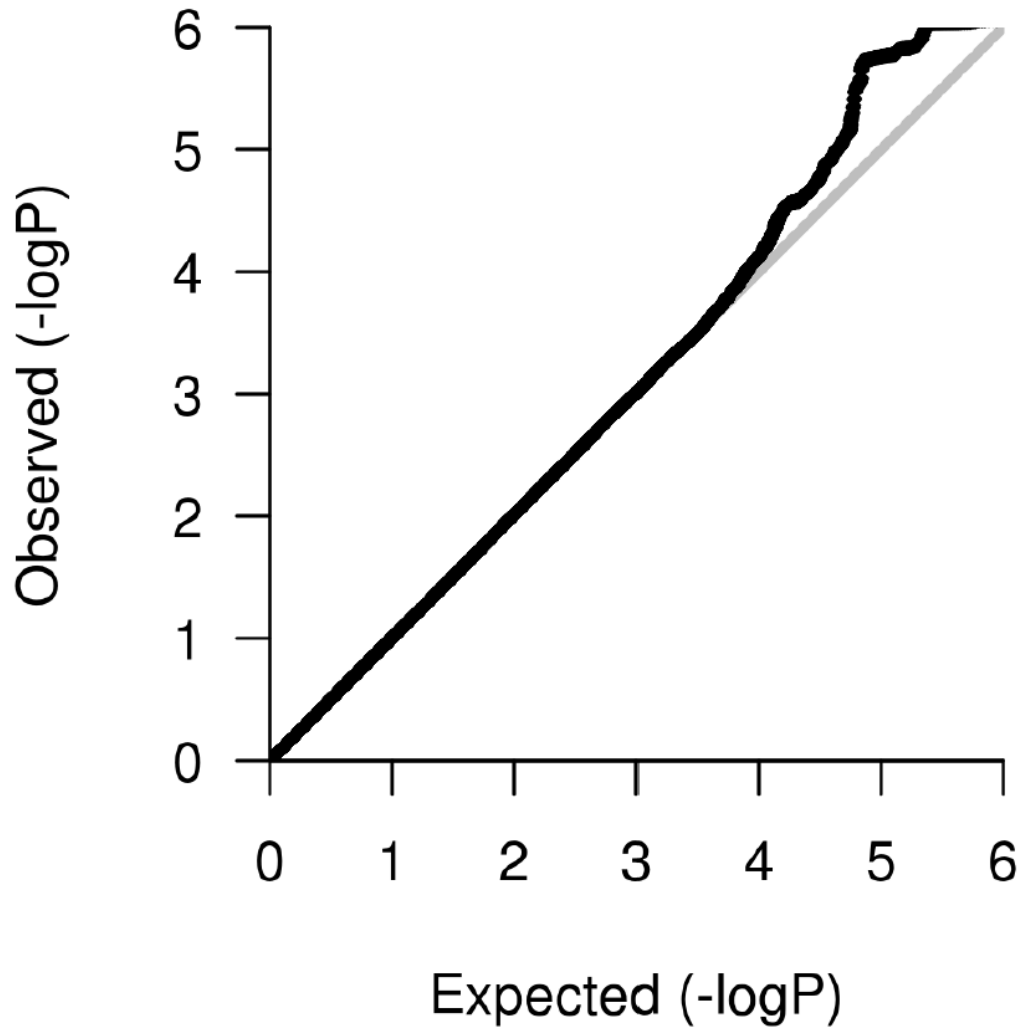

**Figure S73** QQ-plot for basic fibroblast growth factor (FGFbasic).

## QQ-plot for GCSF

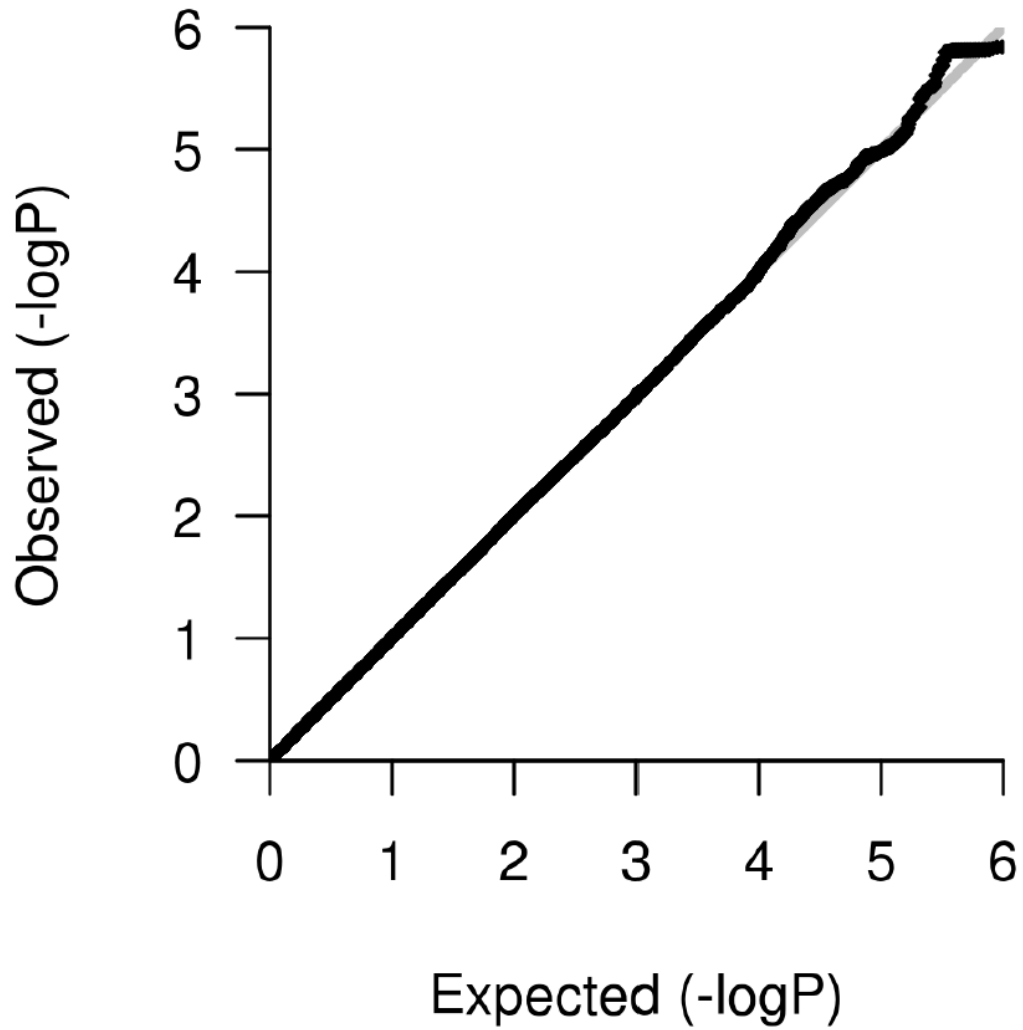

**Figure S74** QQ-plot for granulocyte colony-stimulating factor (GCSF).

## QQ-plot for GROa

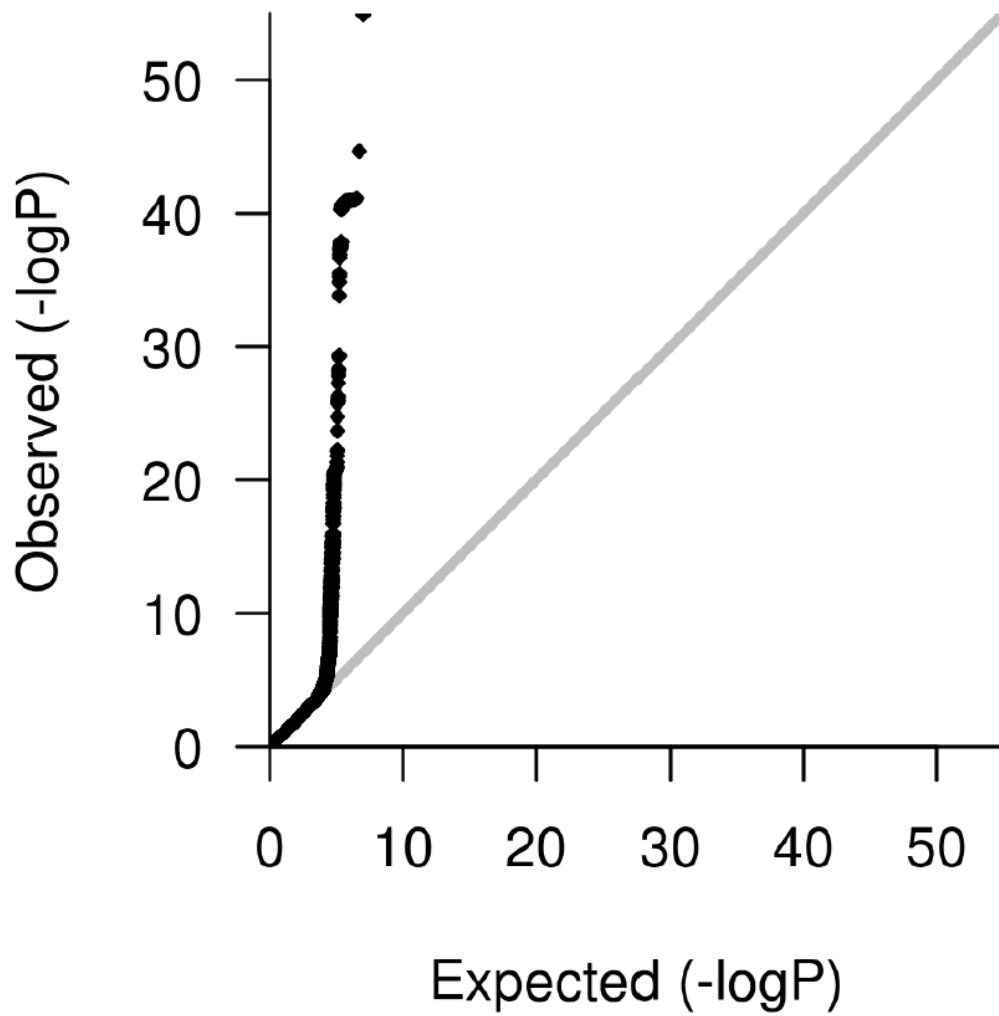

**Figure S75** QQ-plot for growth regulated oncogene- $\alpha$  (GROa; CXCL1).

## QQ-plot for HGF

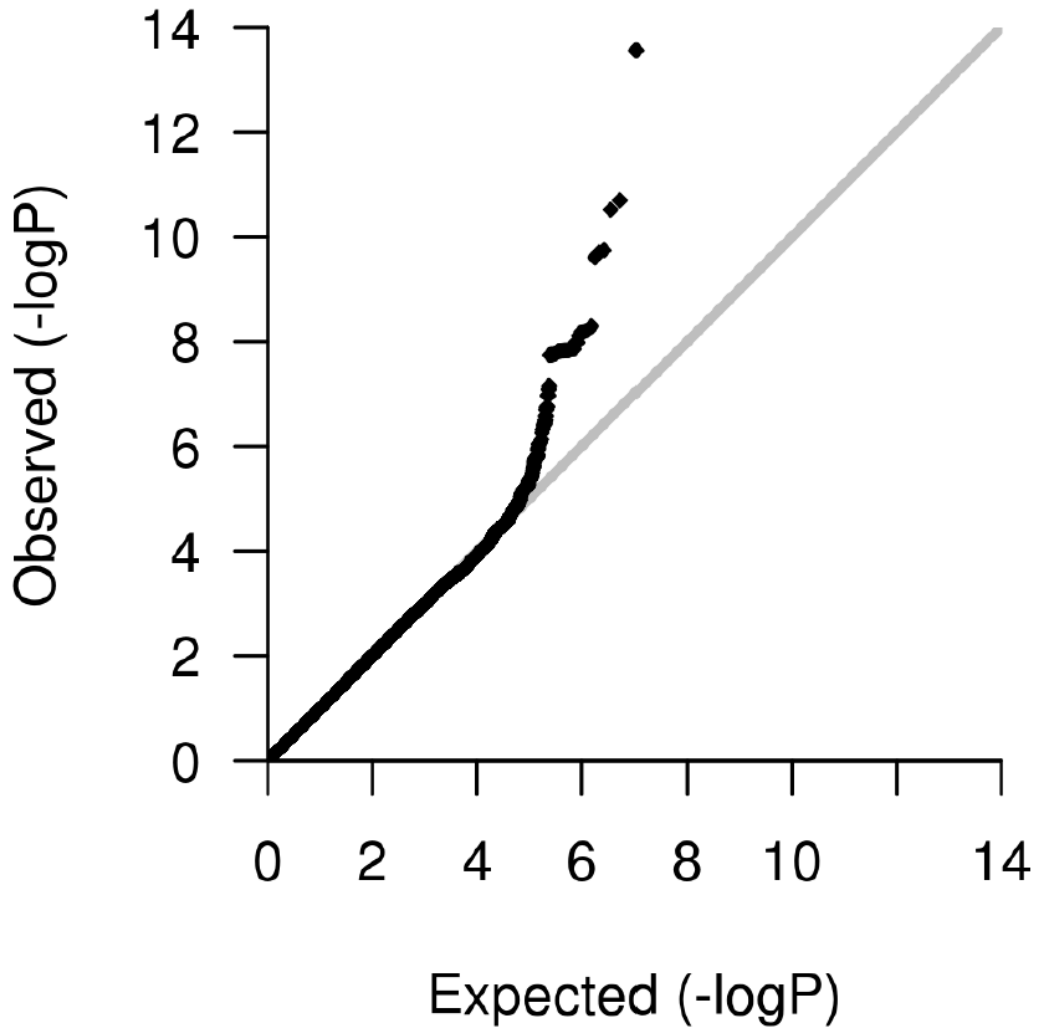

Figure S76 QQ-plot for hepatocyte growth factor (HGF).

## QQ-plot for IFNg

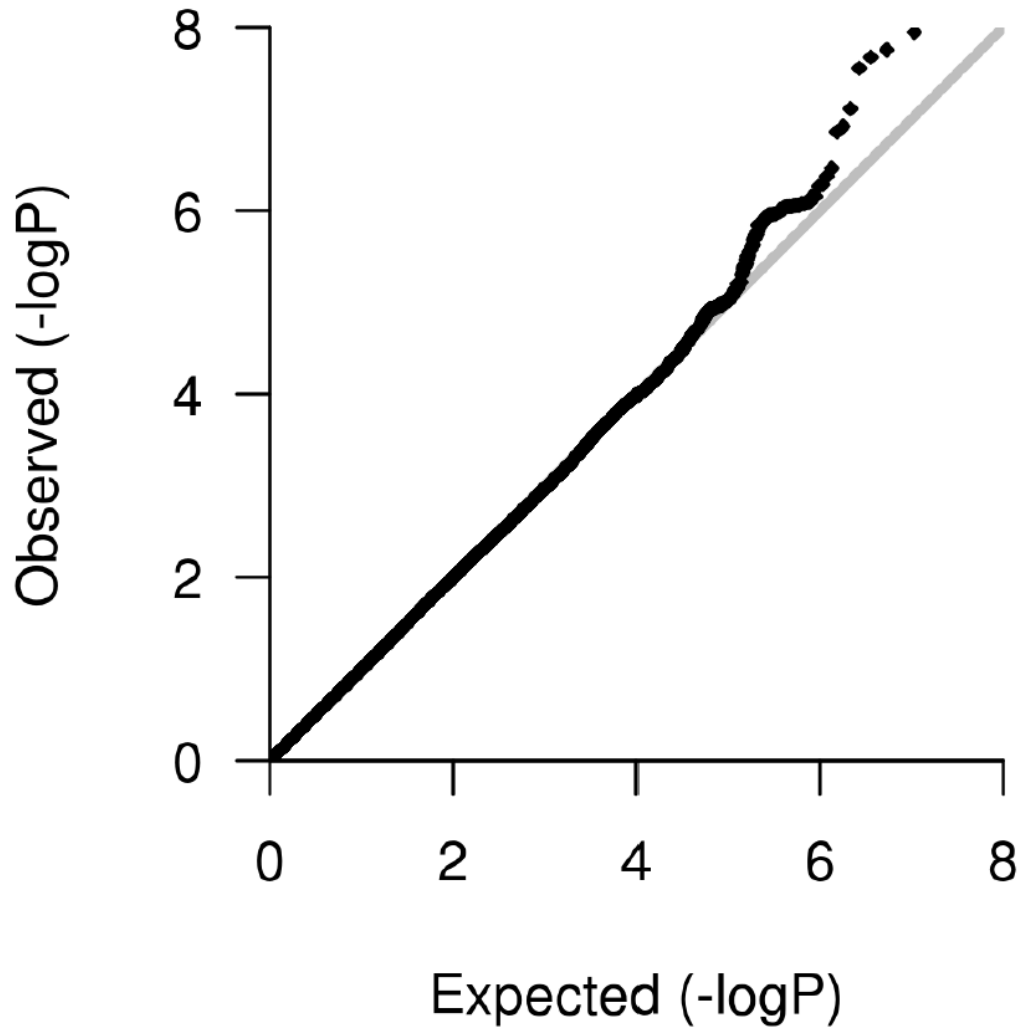

Figure S77 QQ-plot for interferon gamma (IFNg).

## QQ-plot for IL-1b

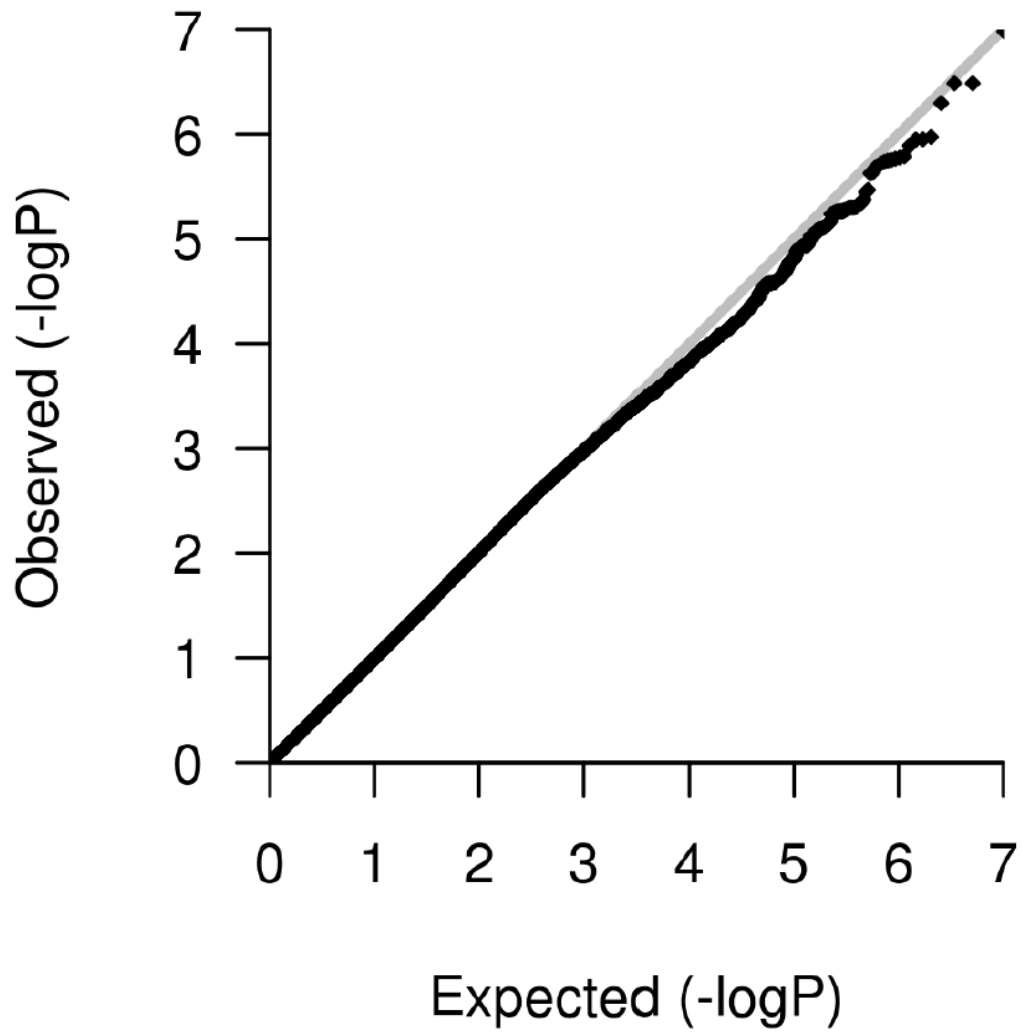

**Figure S78** QQ-plot for interleukin-1-beta (IL-1b).

## QQ-plot for IL1ra

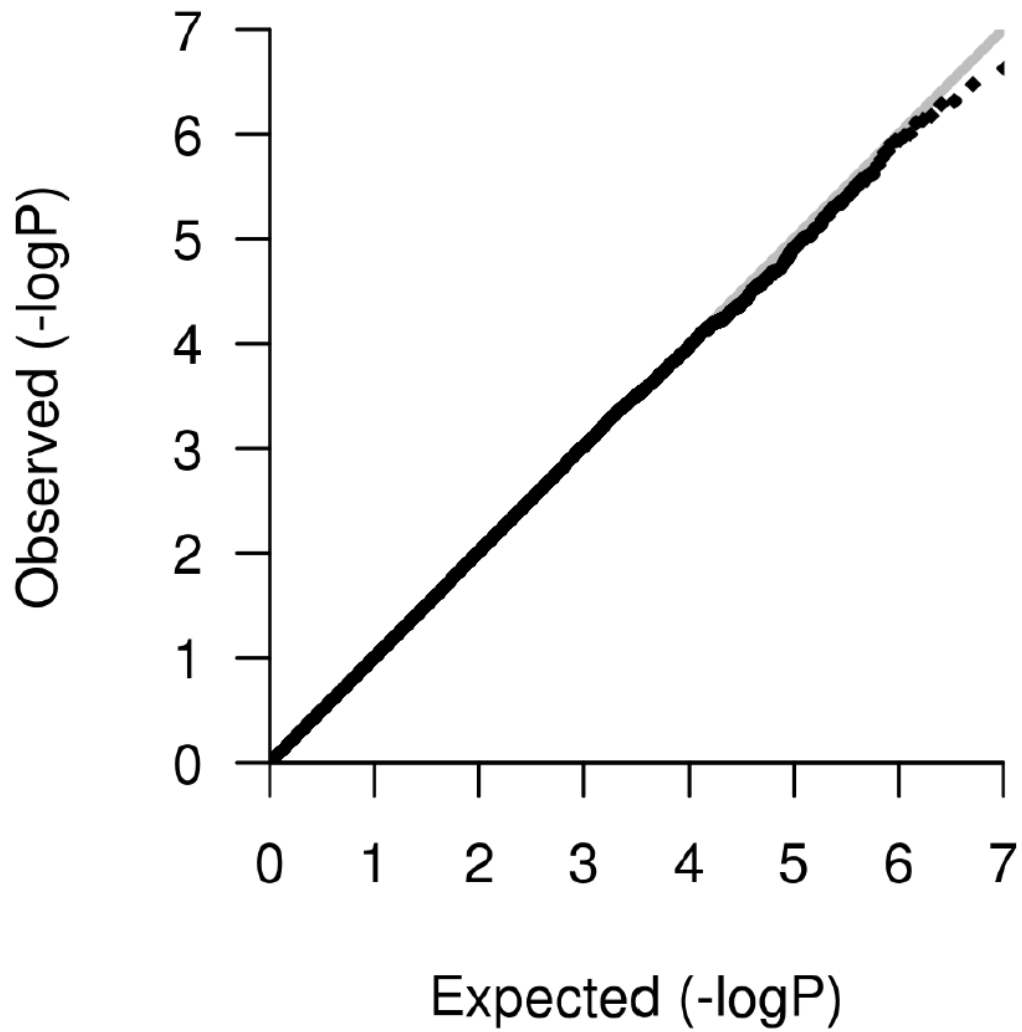

**Figure S79** QQ-plot for interleukin-1 receptor antagonist (IL1ra).



## QQ-plot for IL-2

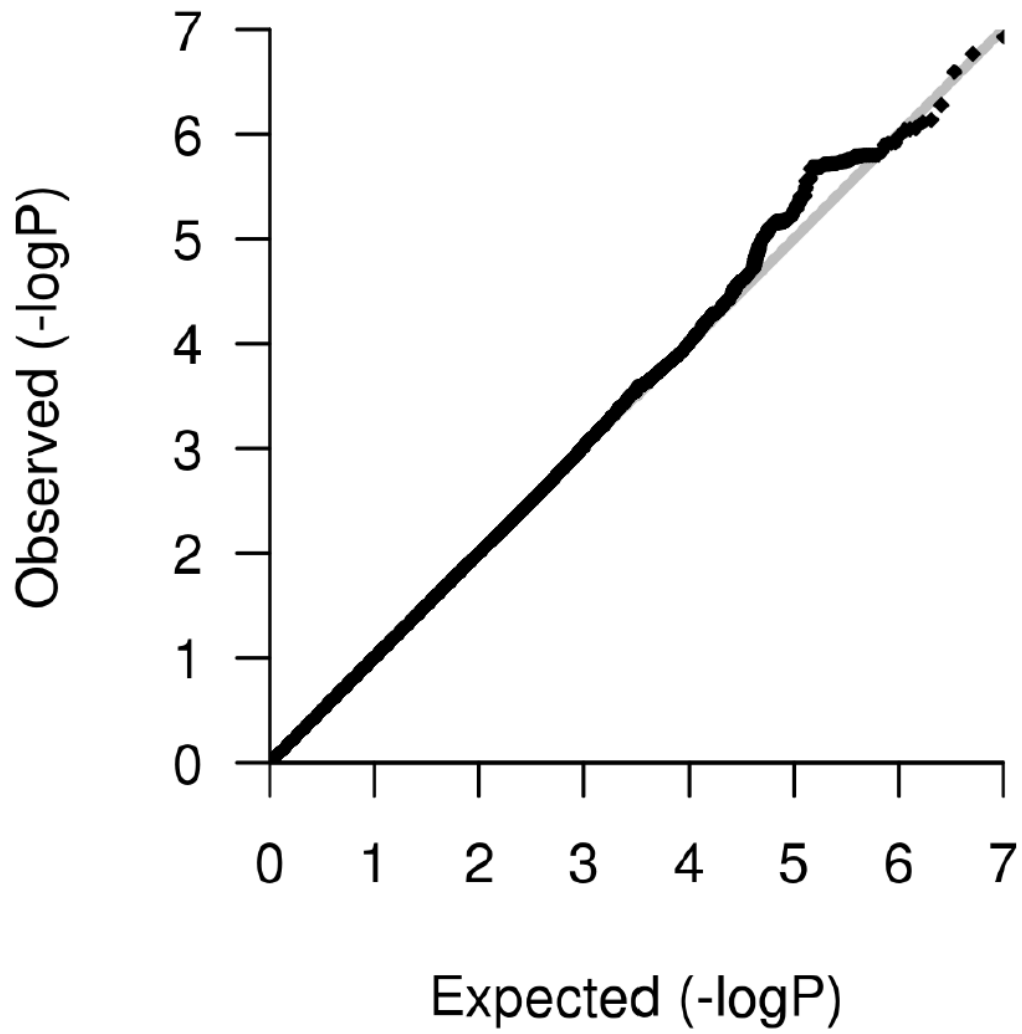

Figure S80 QQ-plot for interleukin-2 (IL-2).

## QQ-plot for IL2ra

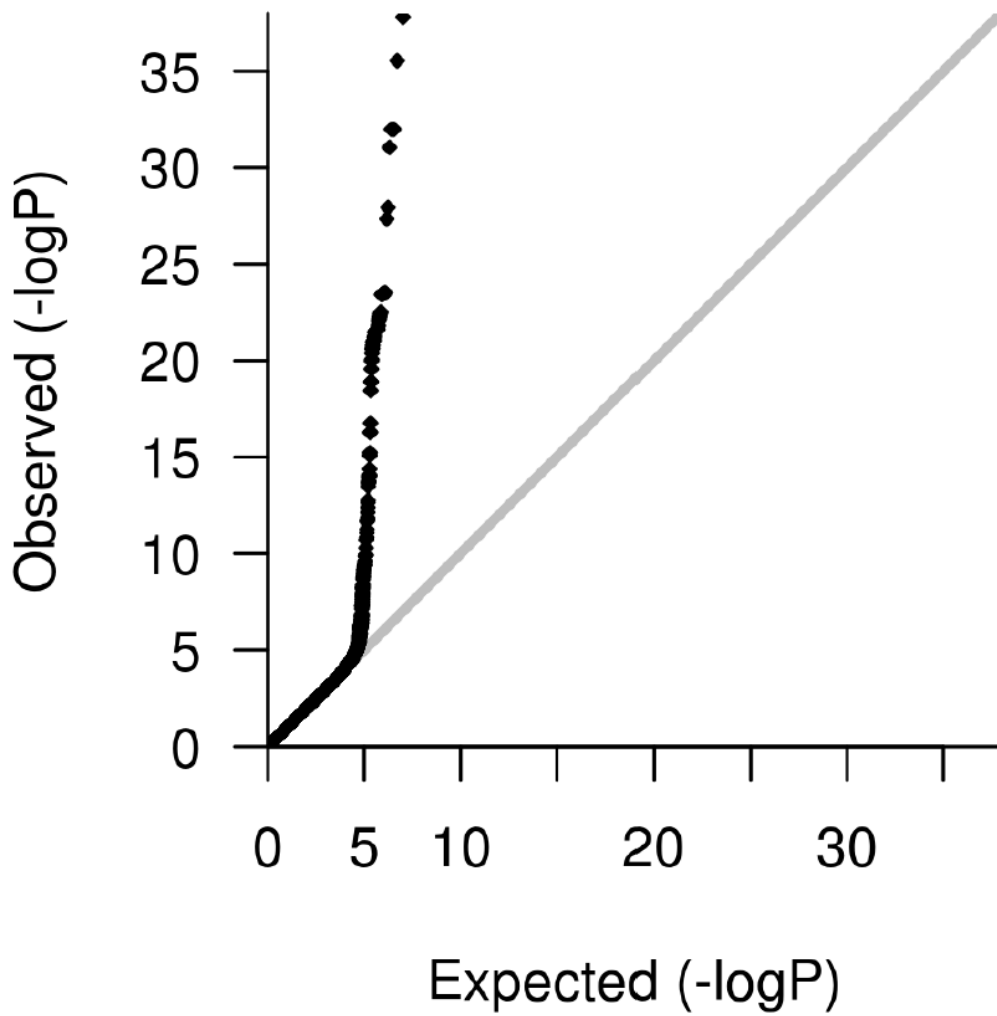

**Figure S81** QQ-plot for Interleukin-2 receptor subunit alpha (IL2ra).

## QQ-plot for IL-4

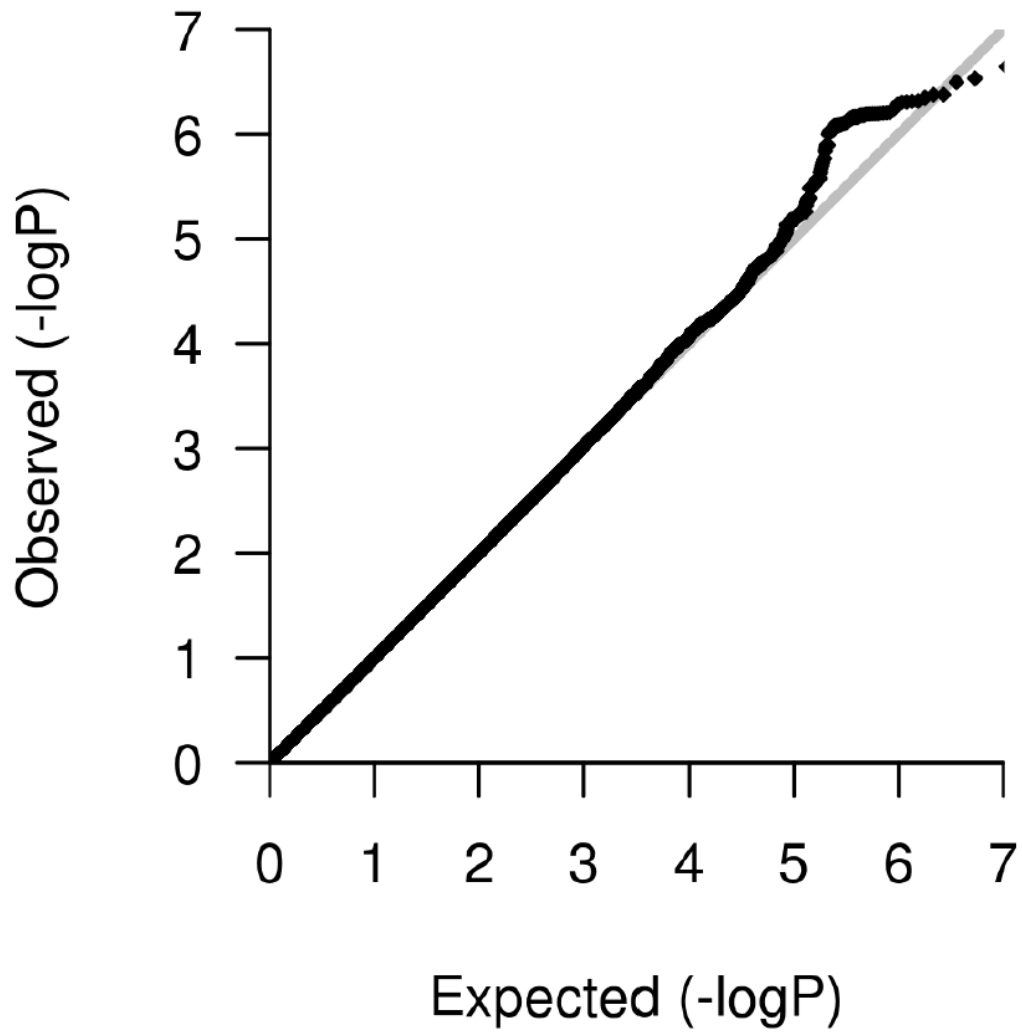

Figure S82 QQ-plot for interleukin-4 (IL-4).

# QQ-plot for IL-5

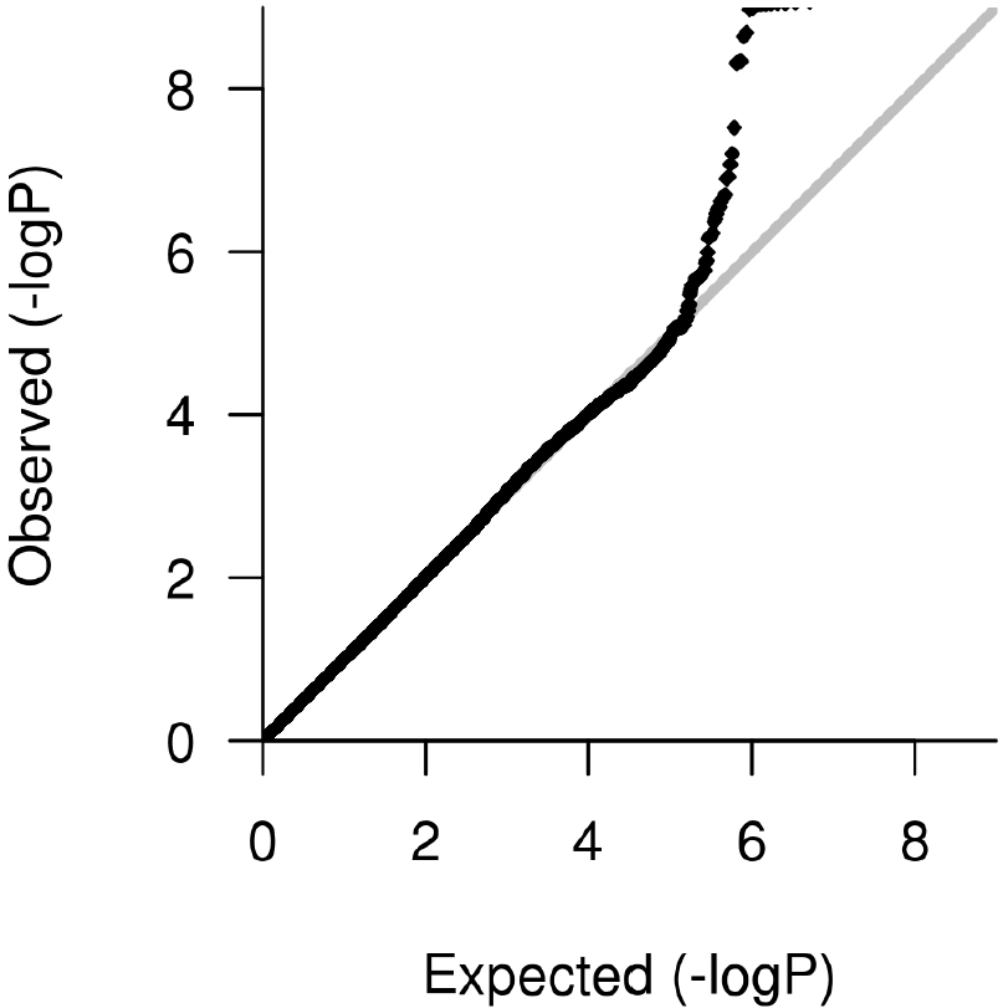

Figure S83 QQ-plot for interleukin-5 (IL-5).

## QQ-plot for IL-6

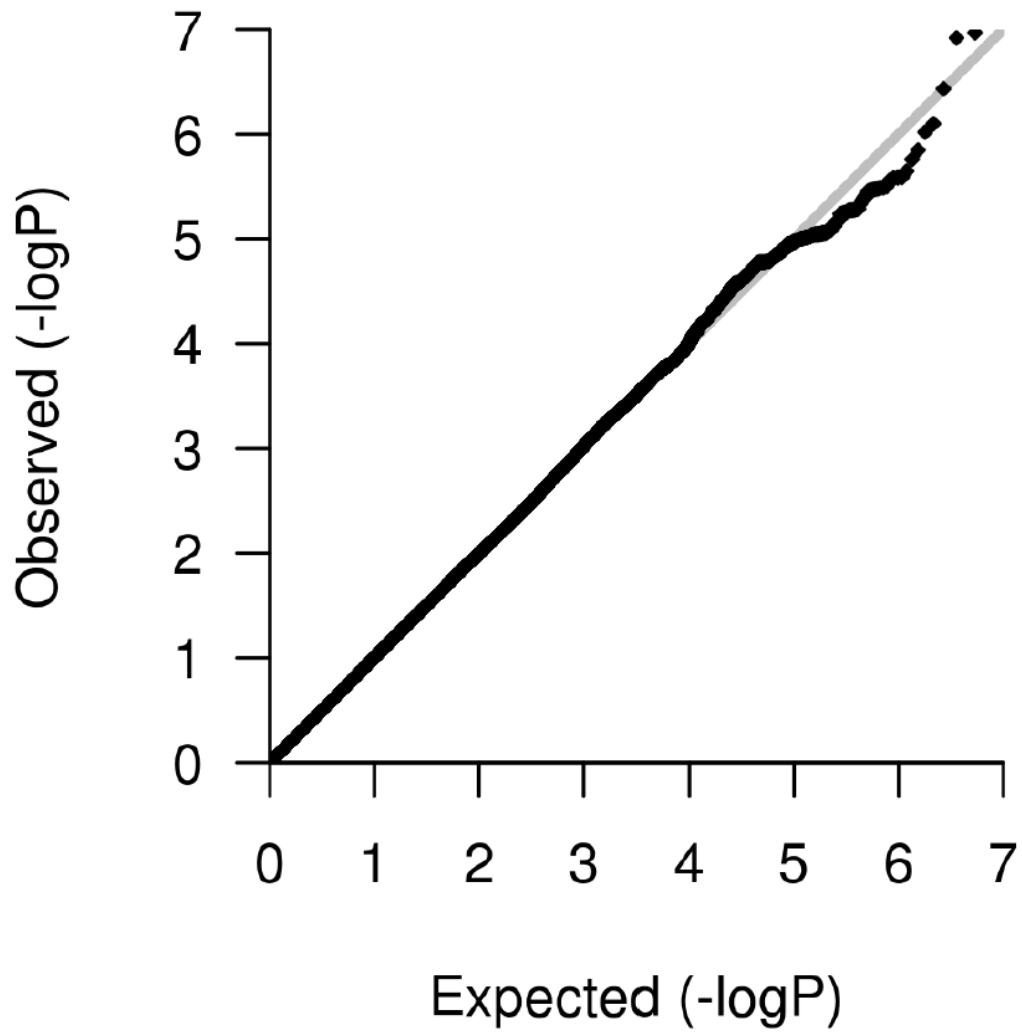

Figure S84 QQ-plot for interleukin-6 (IL-6).

## QQ-plot for IL-7

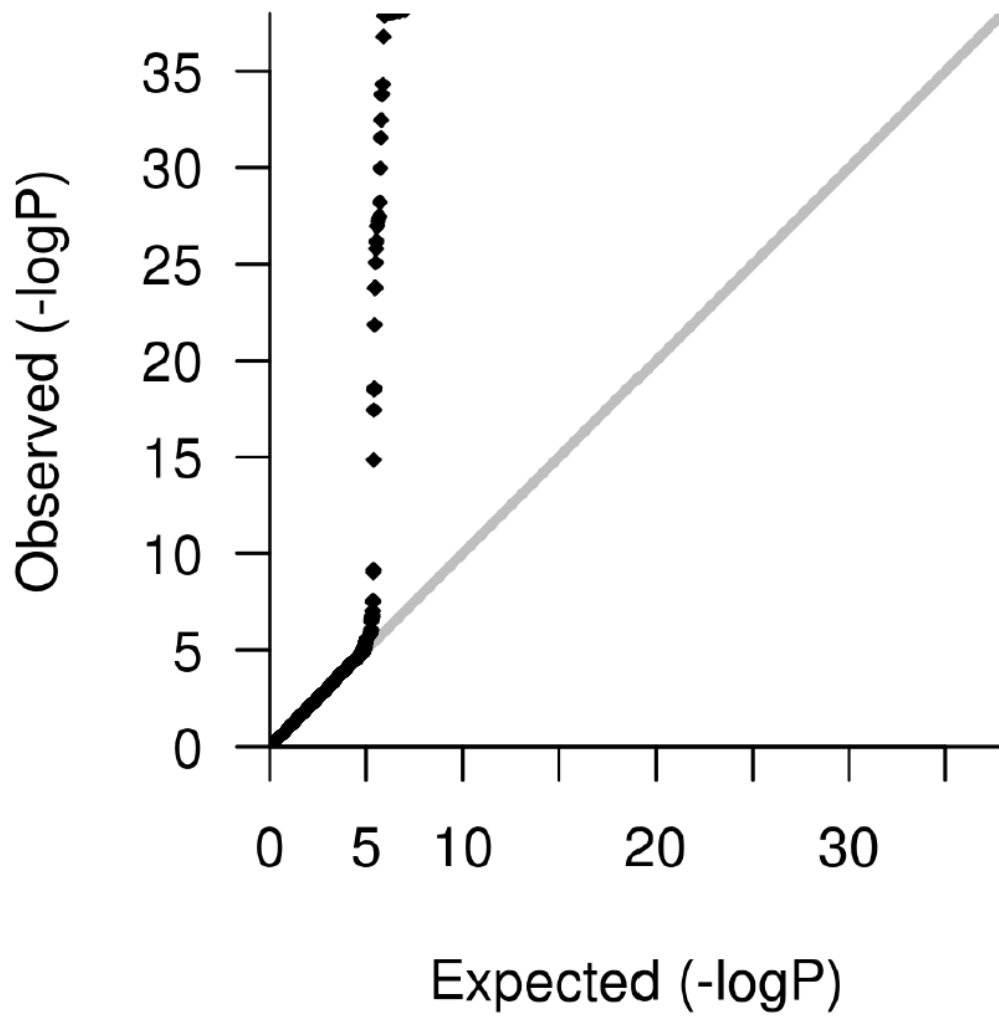

Figure S85 QQ-plot for interleukin-7 (IL-7).

## QQ-plot for IL-8

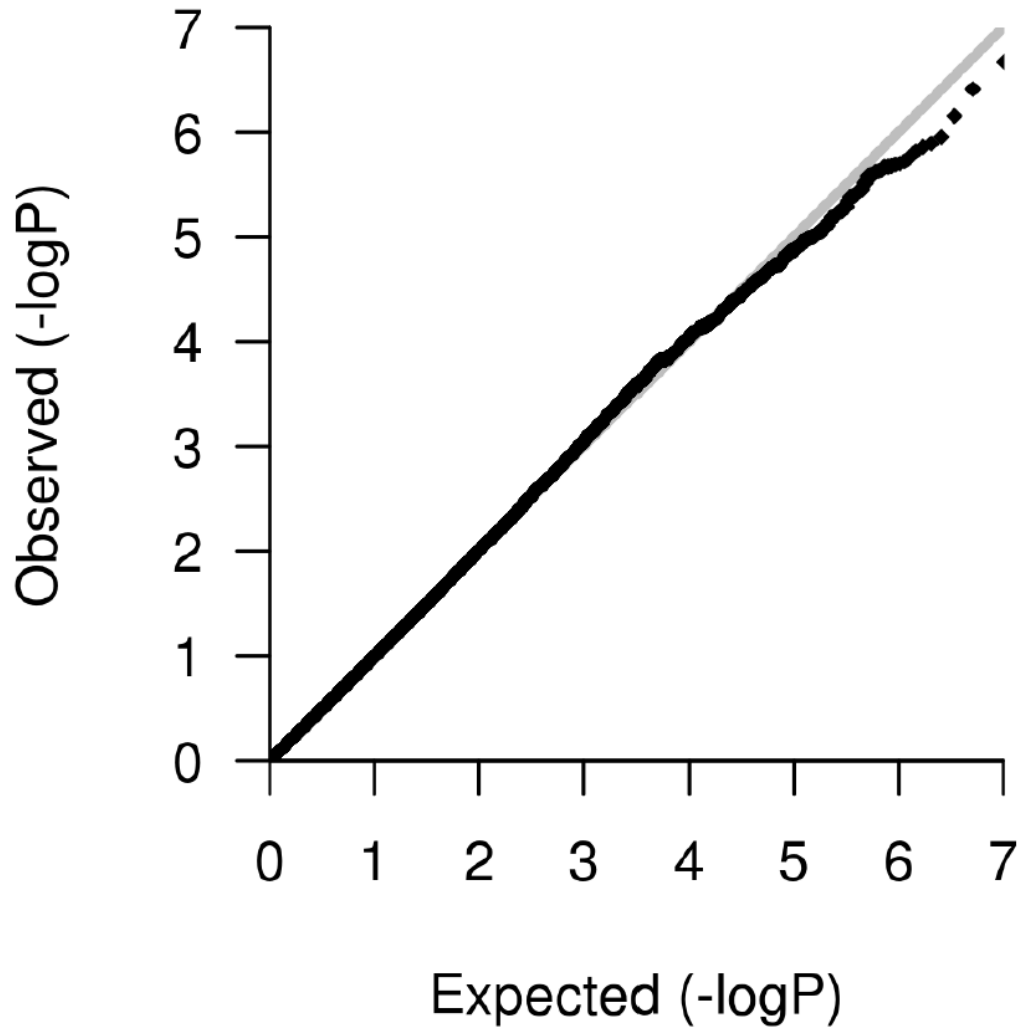

Figure S86 QQ-plot for interleukin-8 (IL-8).

## QQ-plot for IL-9

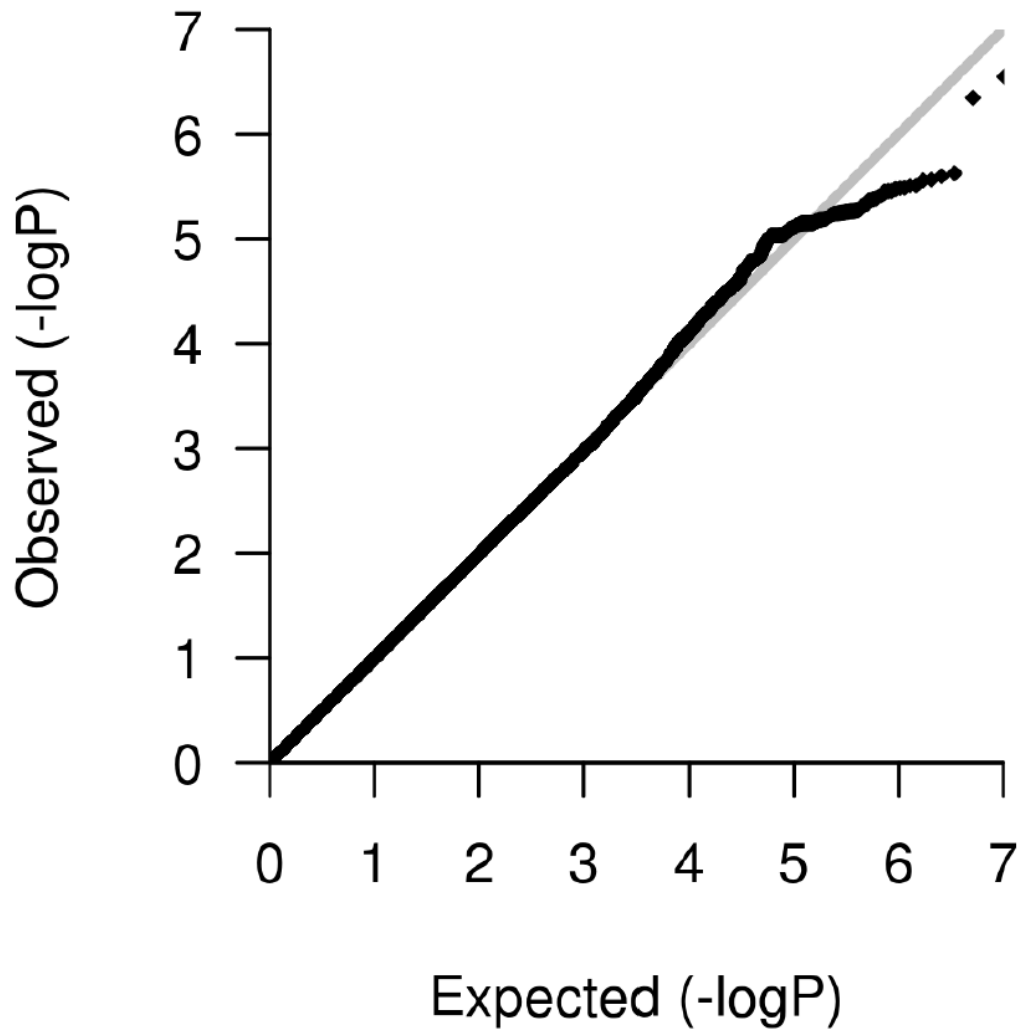

Figure S87 QQ-plot for interleukin-9 (IL-9).



## QQ-plot for IL-10

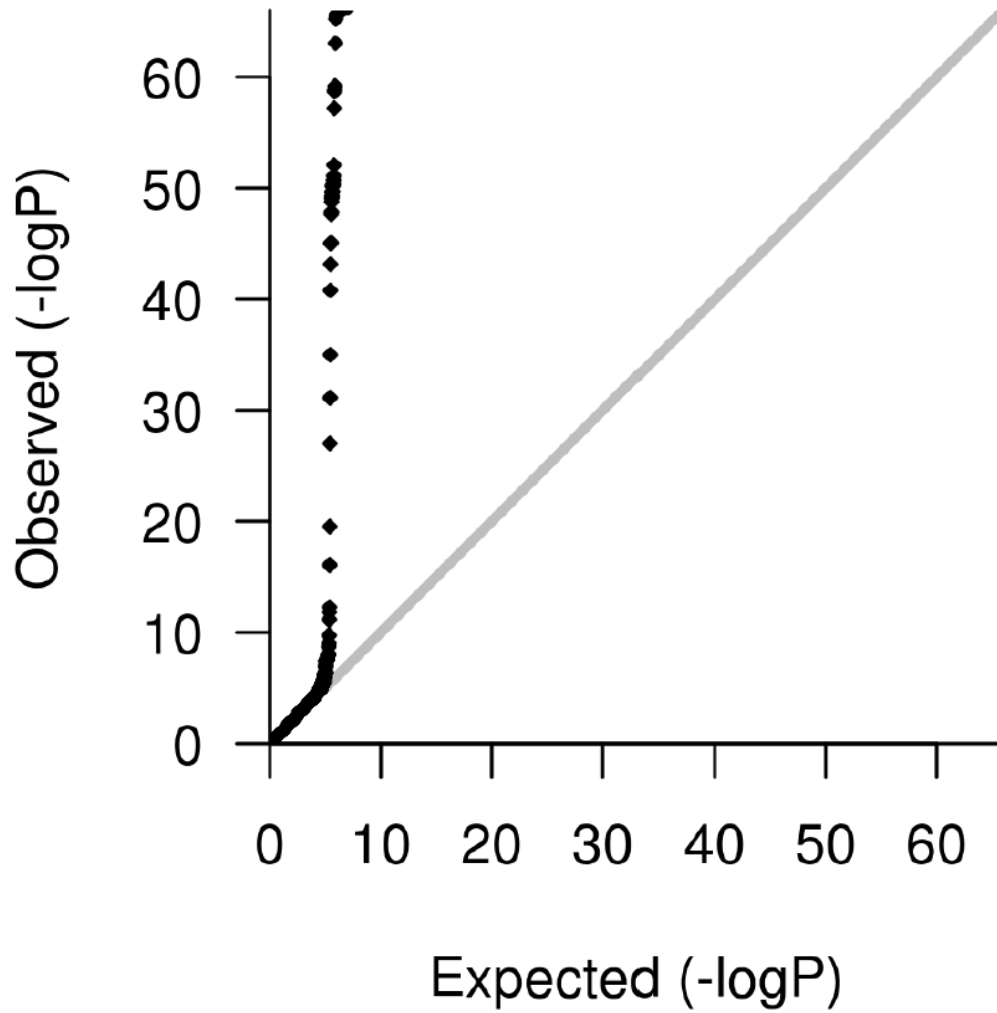

**Figure S88** QQ-plot for interleukin-10 (IL-10).

## QQ-plot for IL-12p70

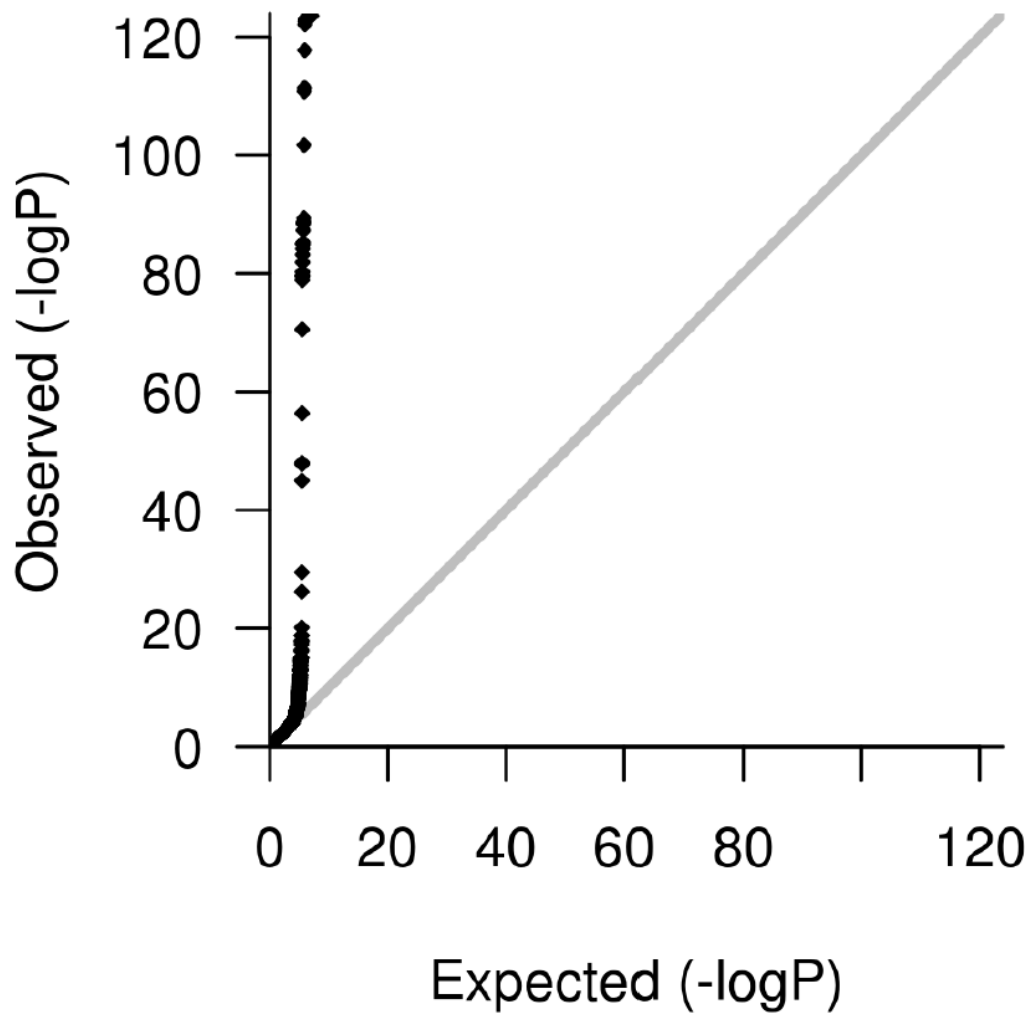

**Figure S89** QQ-plot for interleukin-12p70 (IL-12p70).

## QQ-plot for IL-13

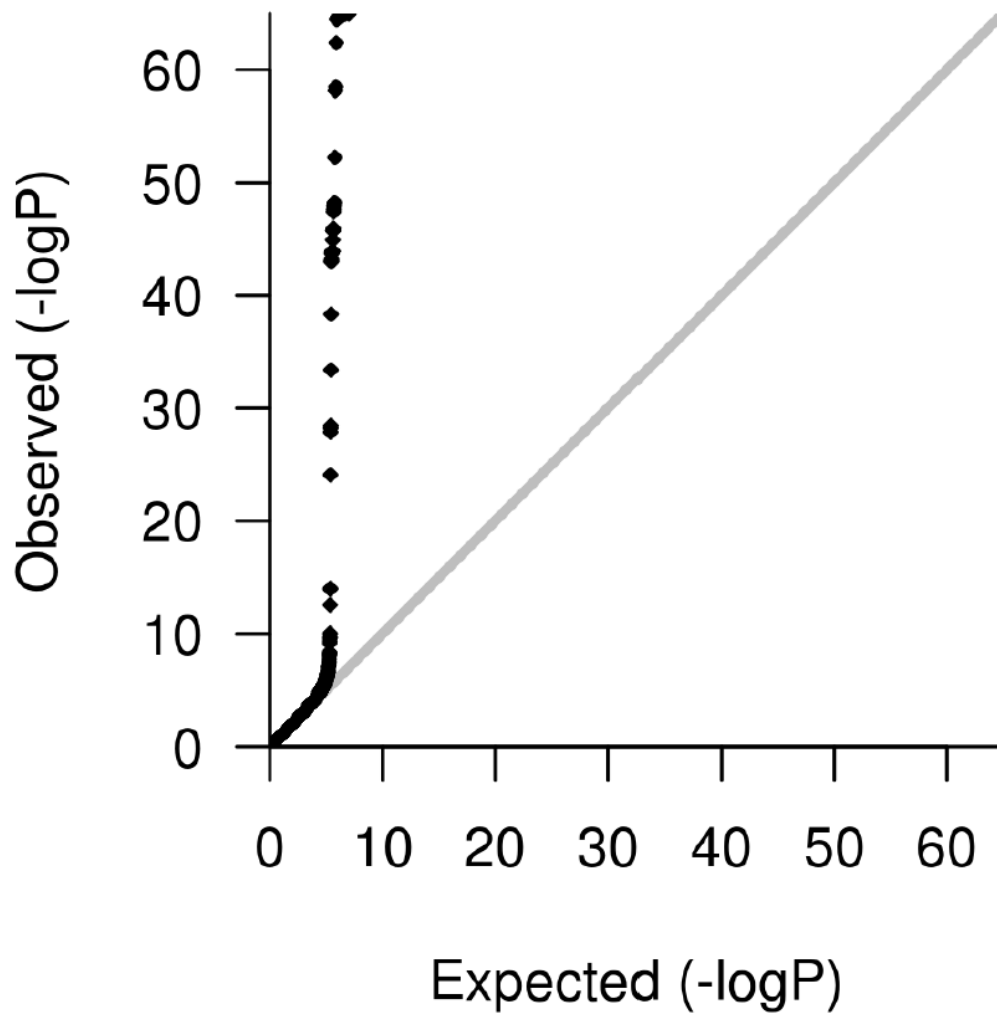

**Figure S90** QQ-plot for interleukin-13 (IL-13).

## QQ-plot for IL-16

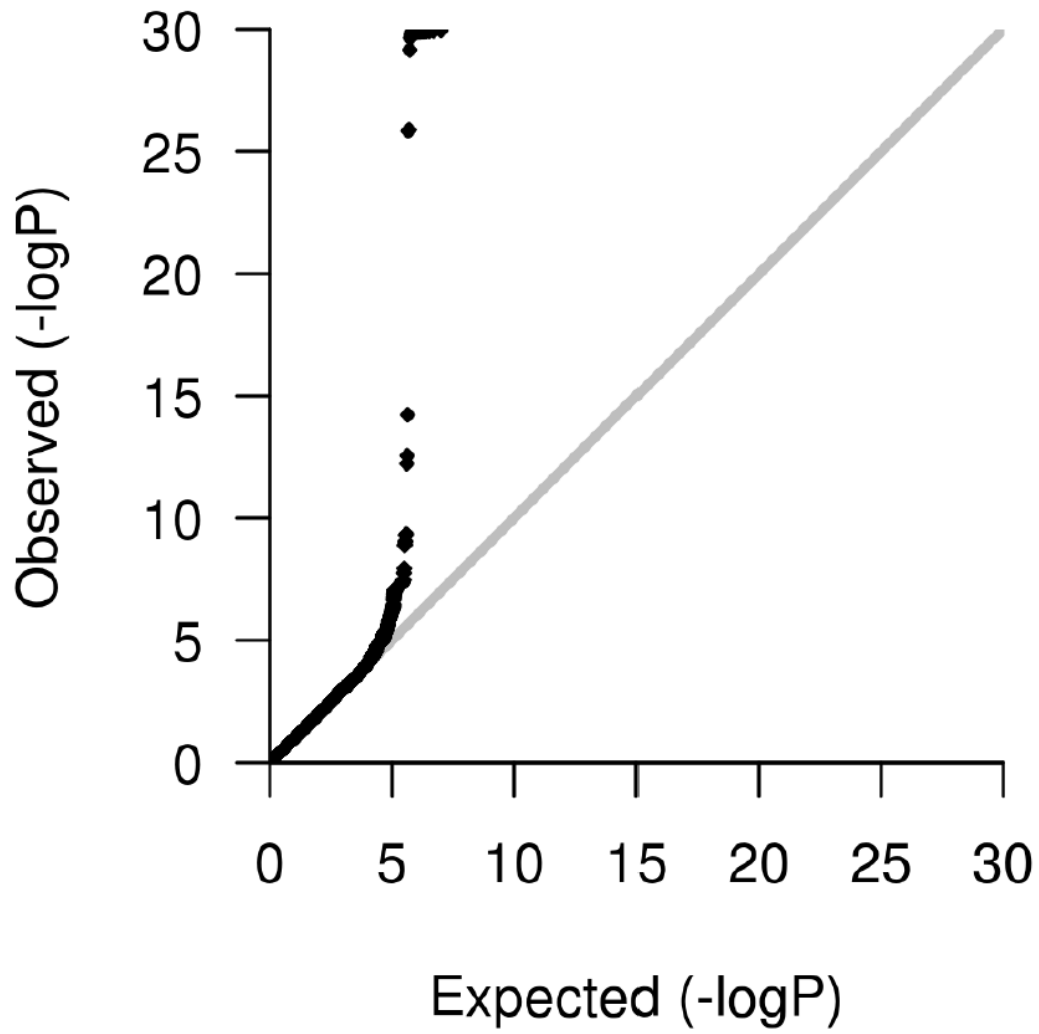

Figure S91 QQ-plot for interleukin-16 (IL-16).

## QQ-plot for IL-17

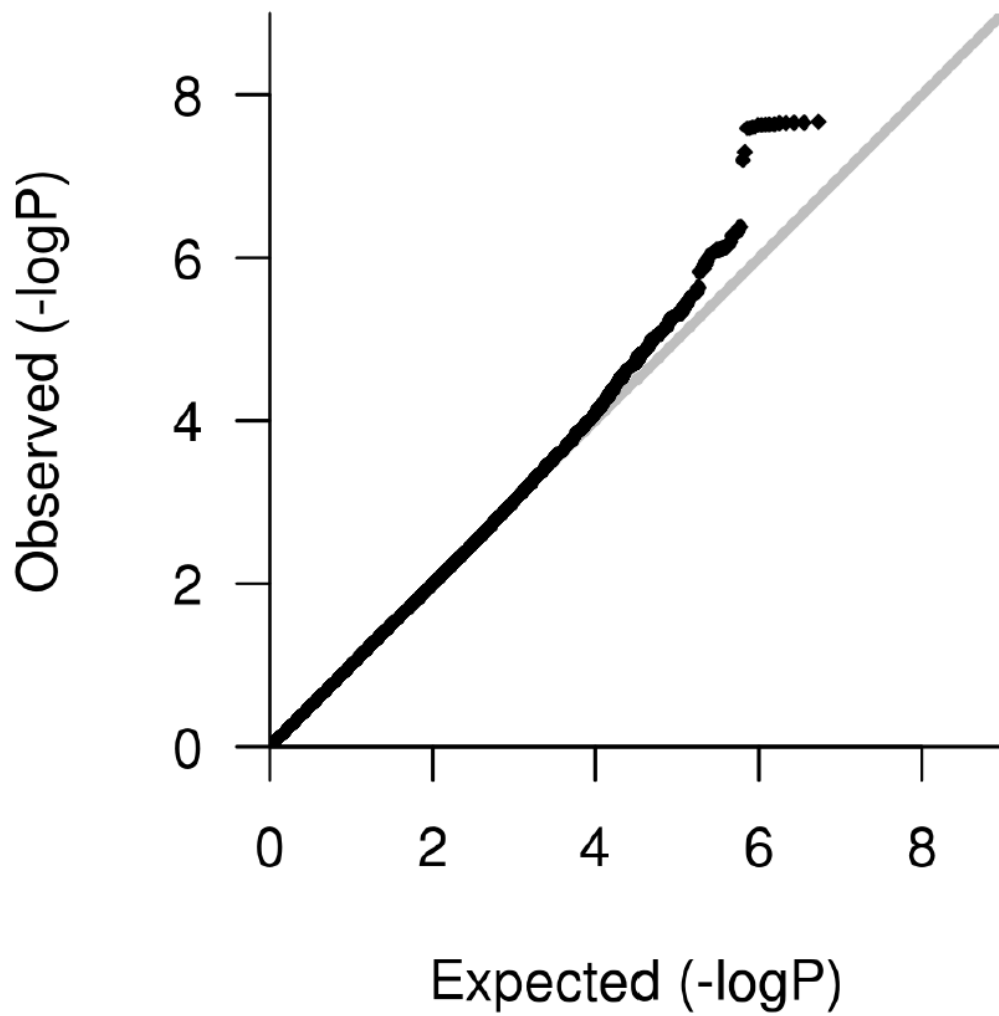

**Figure S92** QQ-plot for interleukin-17 (IL-17).

## QQ-plot for IL-18

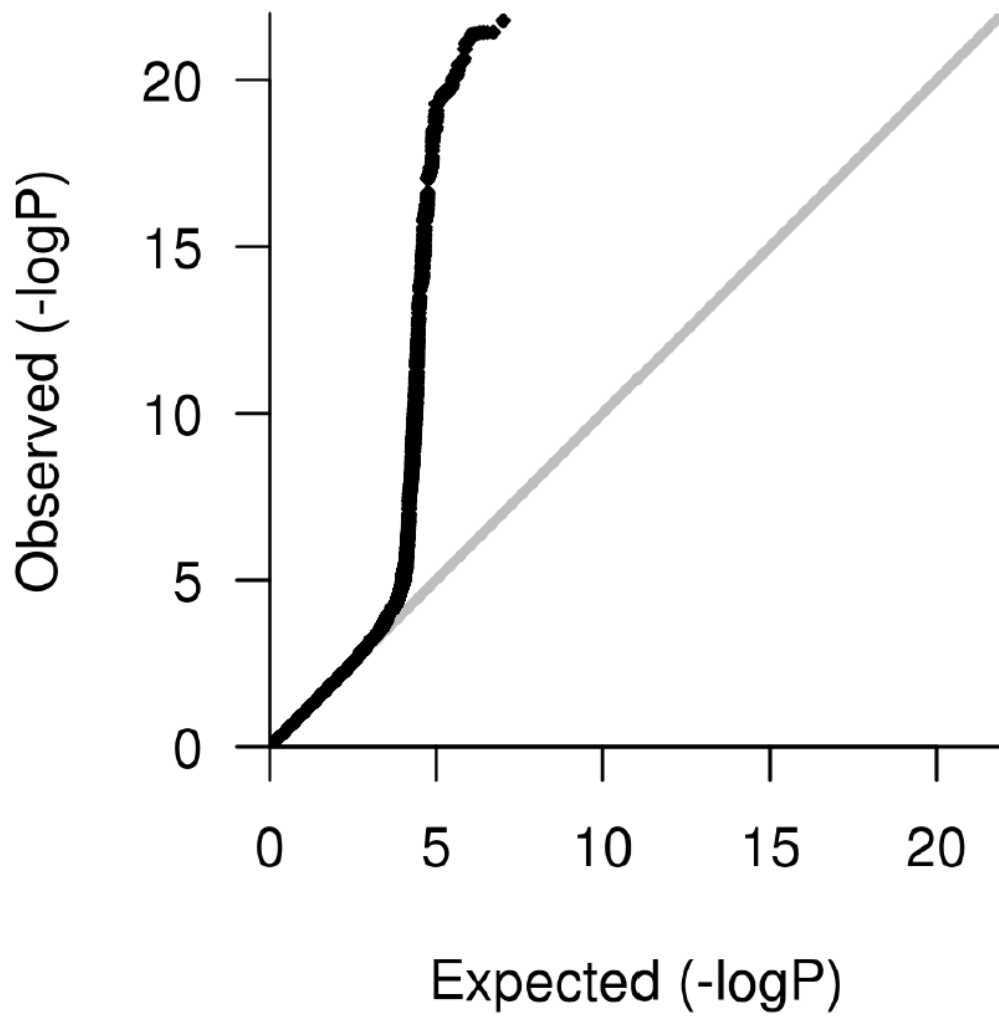

Figure S93 QQ-plot for interleukin-18 (IL-18).

## QQ-plot for IP10

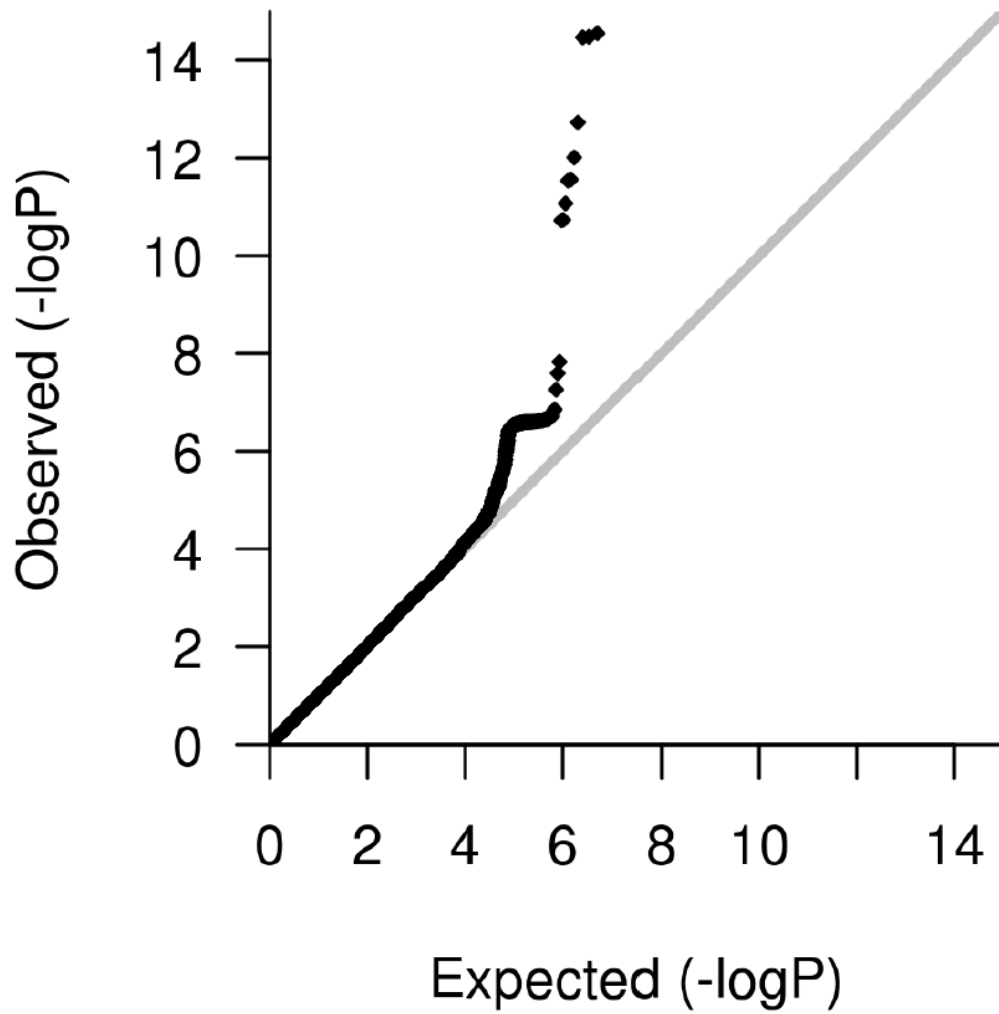

**Figure S94** QQ-plot for interferon gamma-induced protein 10 (IP10; CXCL10).

## QQ-plot for MCP1

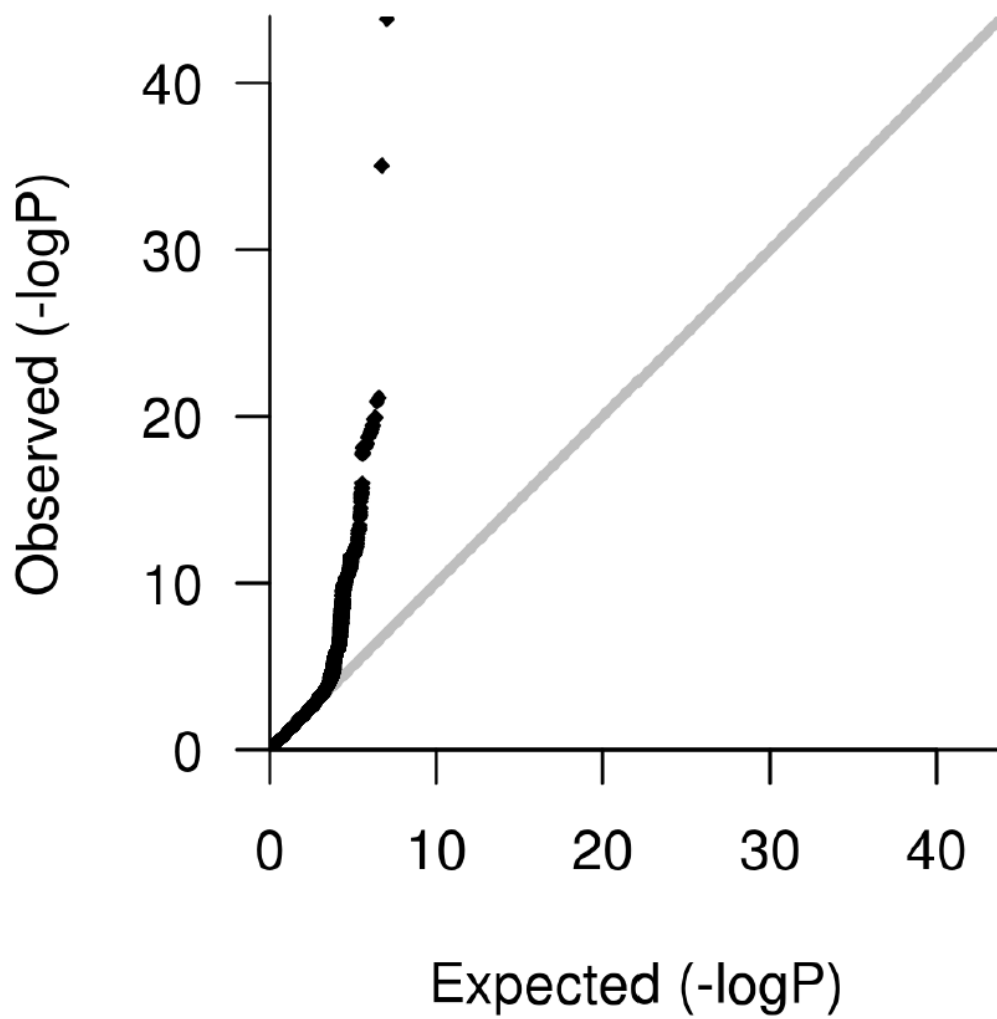

**Figure S95** QQ-plot for monocyte chemotactic protein-1 (MCP1; CCL2)



## QQ-plot for MCP3

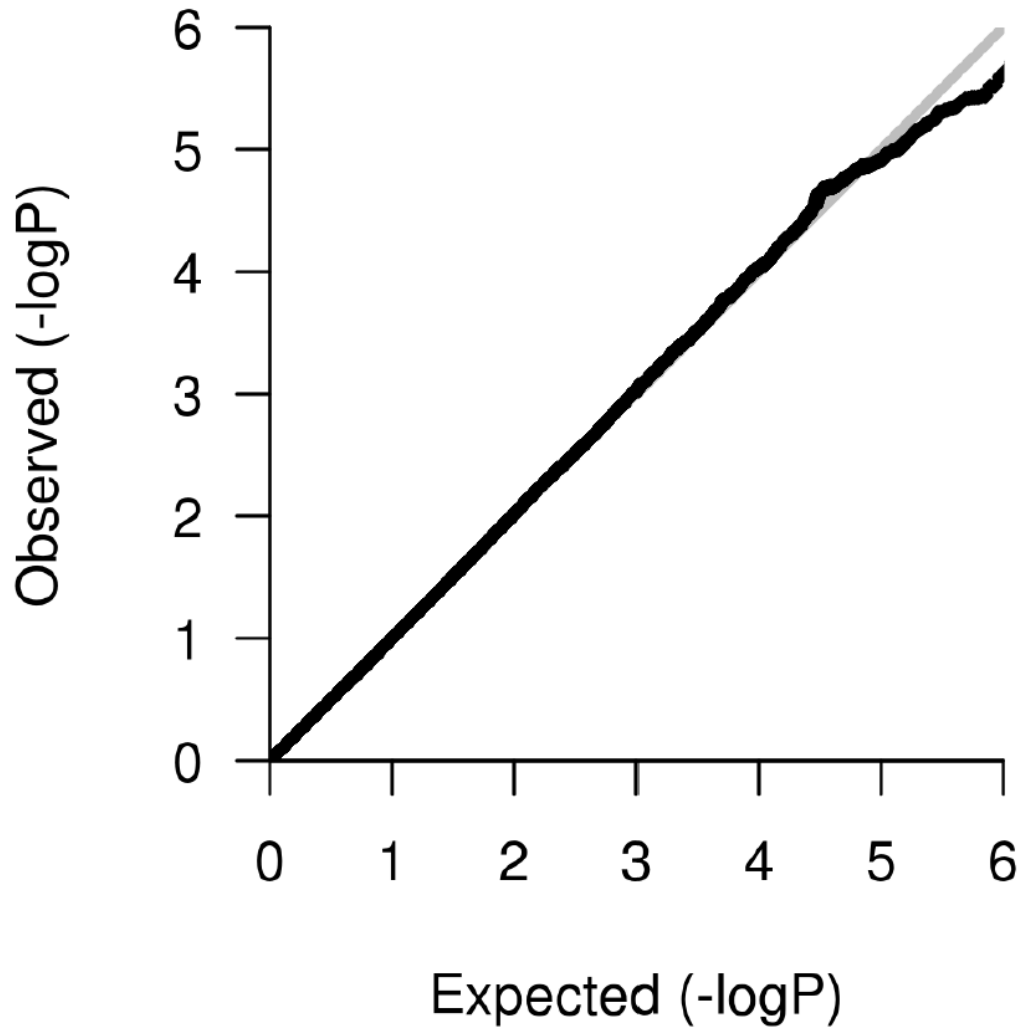

**Figure S96** QQ-plot for monocyte specific chemokine 3 (MCP3; CCL7).

## QQ-plot for MCSF

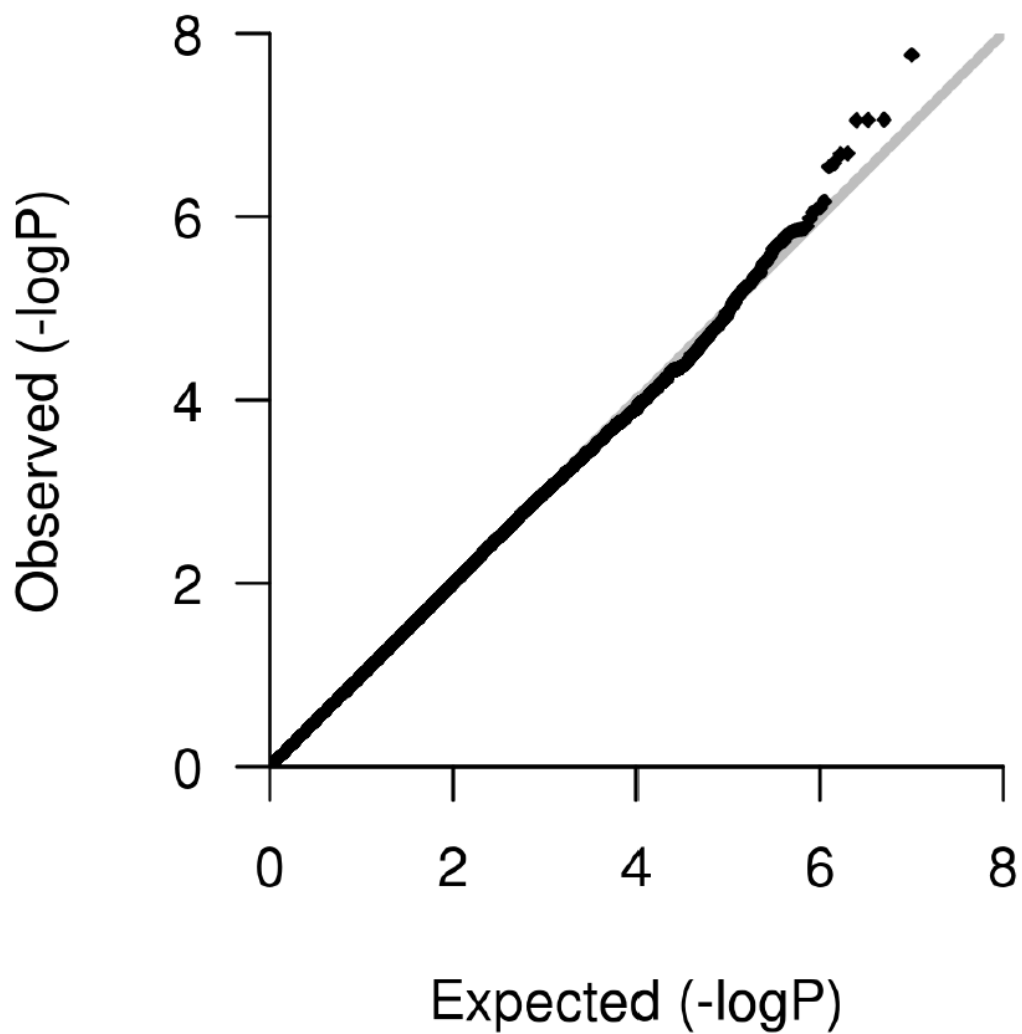

**Figure S97** QQ-plot for macrophage colony-stimulating factor (MCSF).

## QQ-plot for MIF

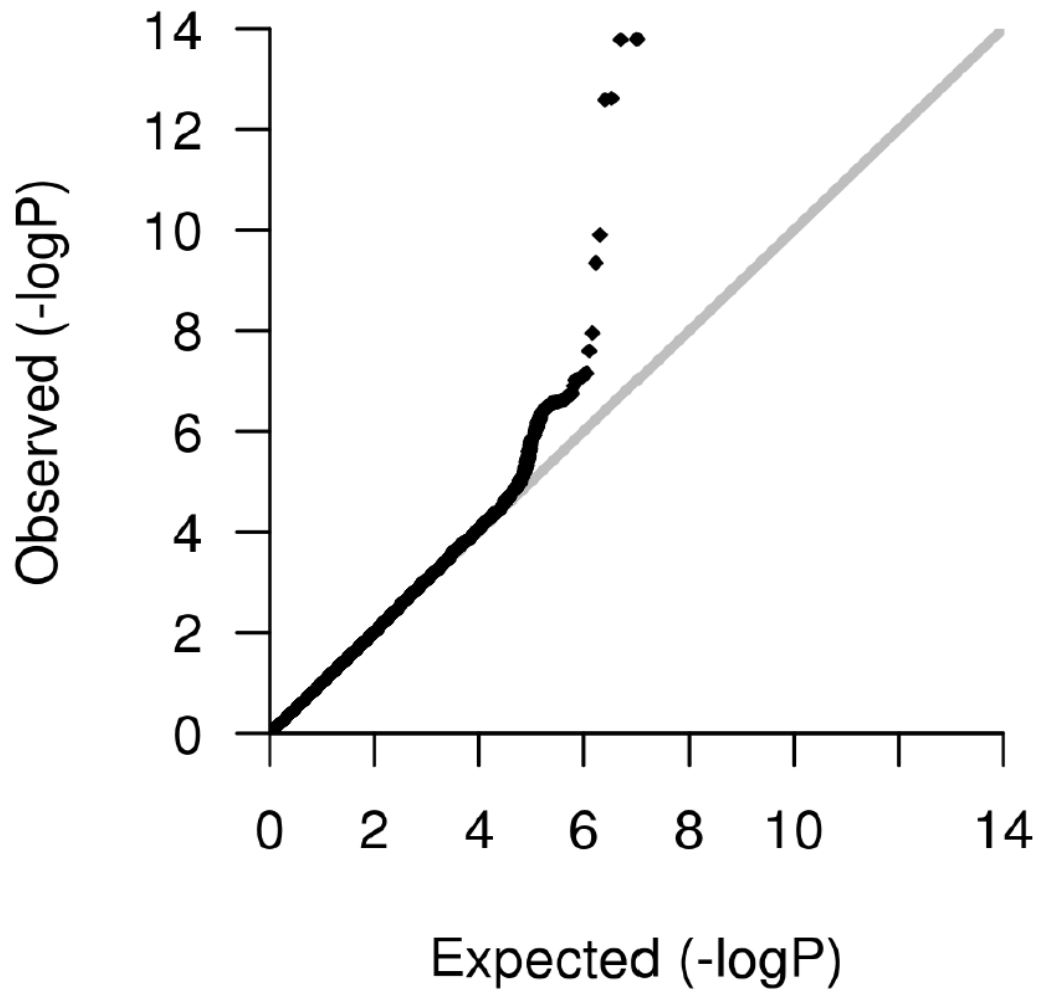

**Figure S98** QQ-plot for macrophage migration inhibitory factor (glycosylation-inhibiting factor; MIF).

## QQ-plot for MIG

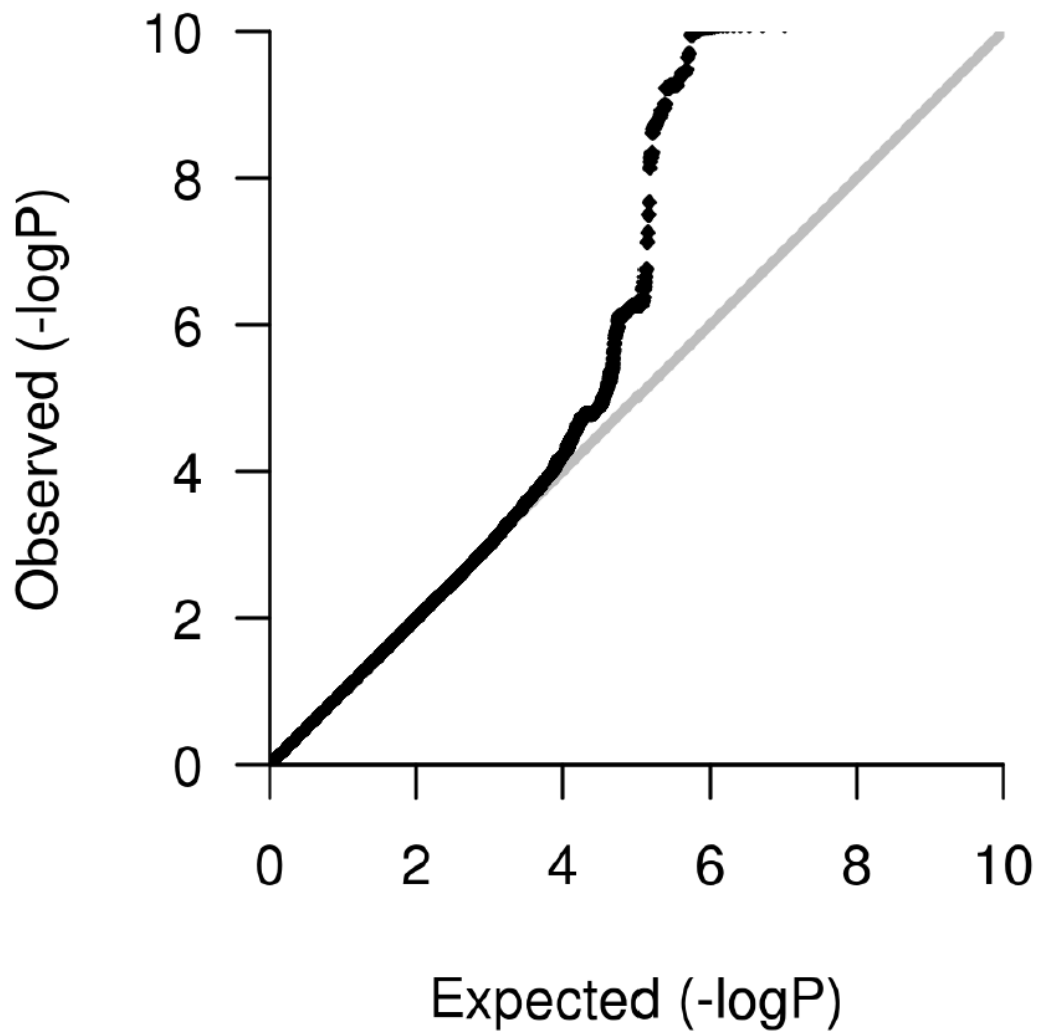

**Figure S99** QQ-plot for monokine induced by interferon-gamma (MIG; CXCL9).

## QQ-plot for MIP1a

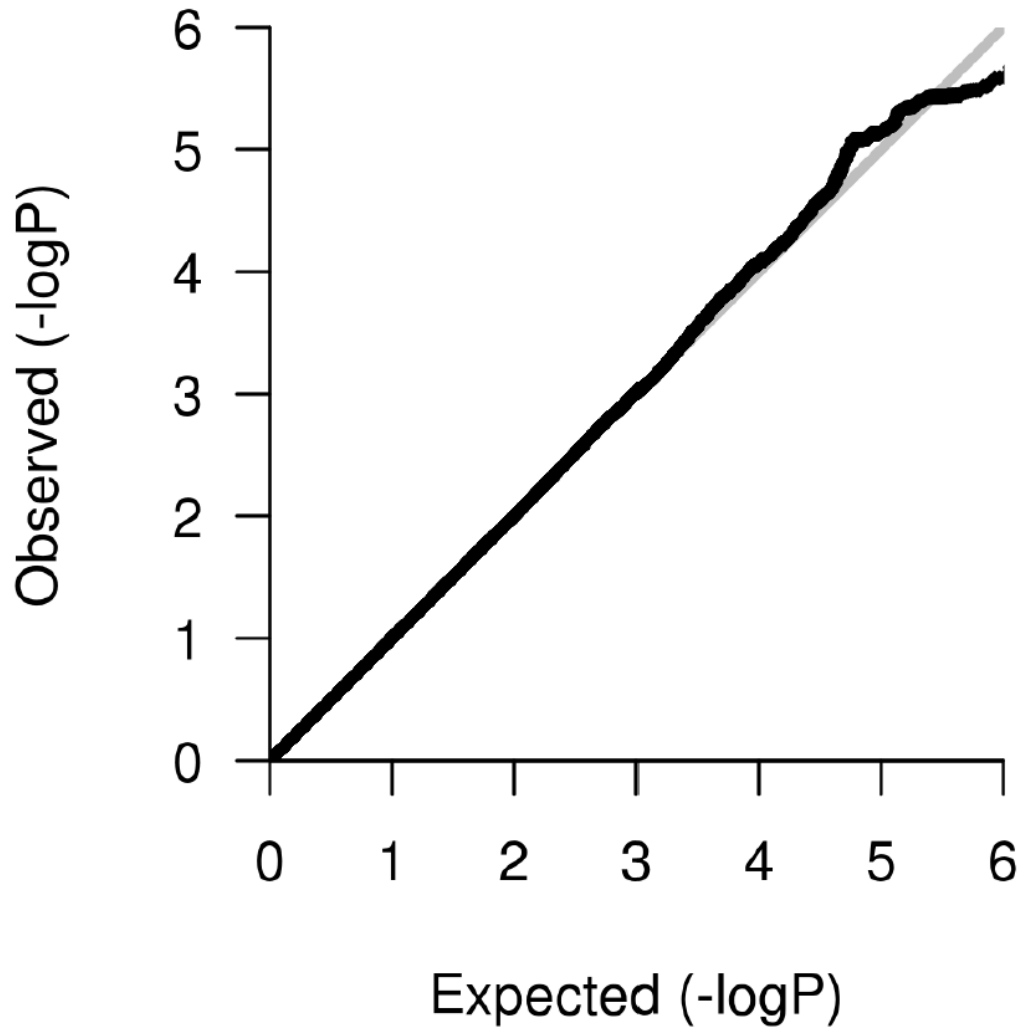

**Figure S100** QQ-plot for macrophage inflammatory protein-1 $\alpha$  (MIP1a; CCL3).

## QQ-plot for MIP1b

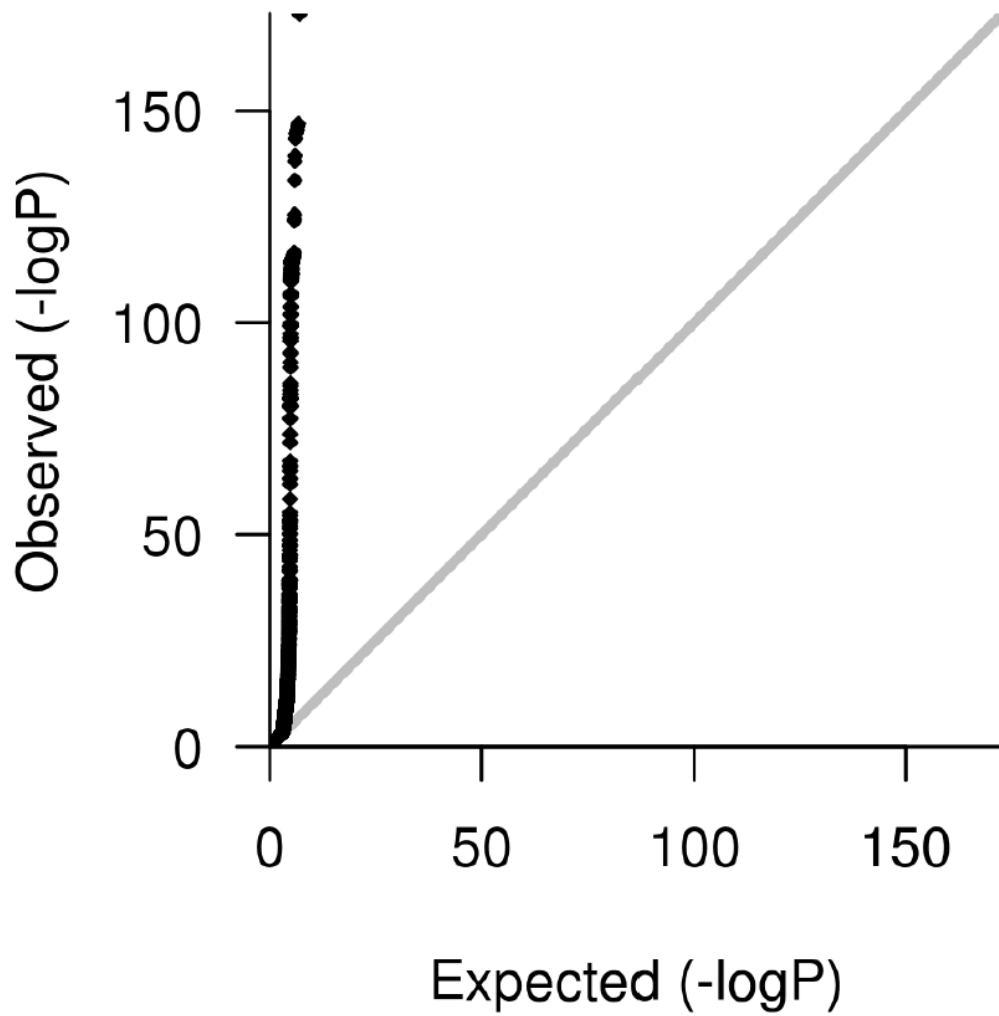

**Figure S101** QQ-plot for macrophage inflammatory protein-1 $\beta$  (MIP1b; CCL4).

## QQ-plot for PDGFbb

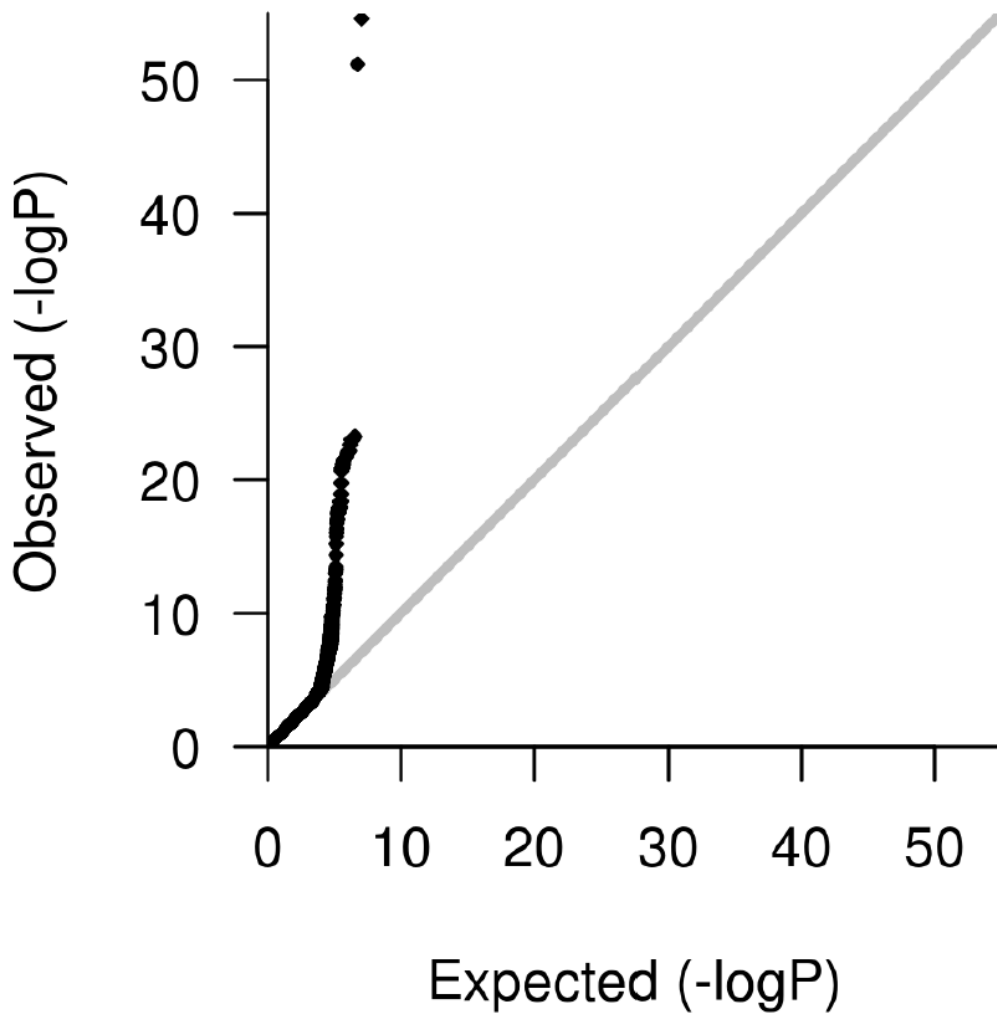

**Figure S102** QQ-plot for platelet derived growth factor (PDGFbb).

## QQ-plot for RANTES

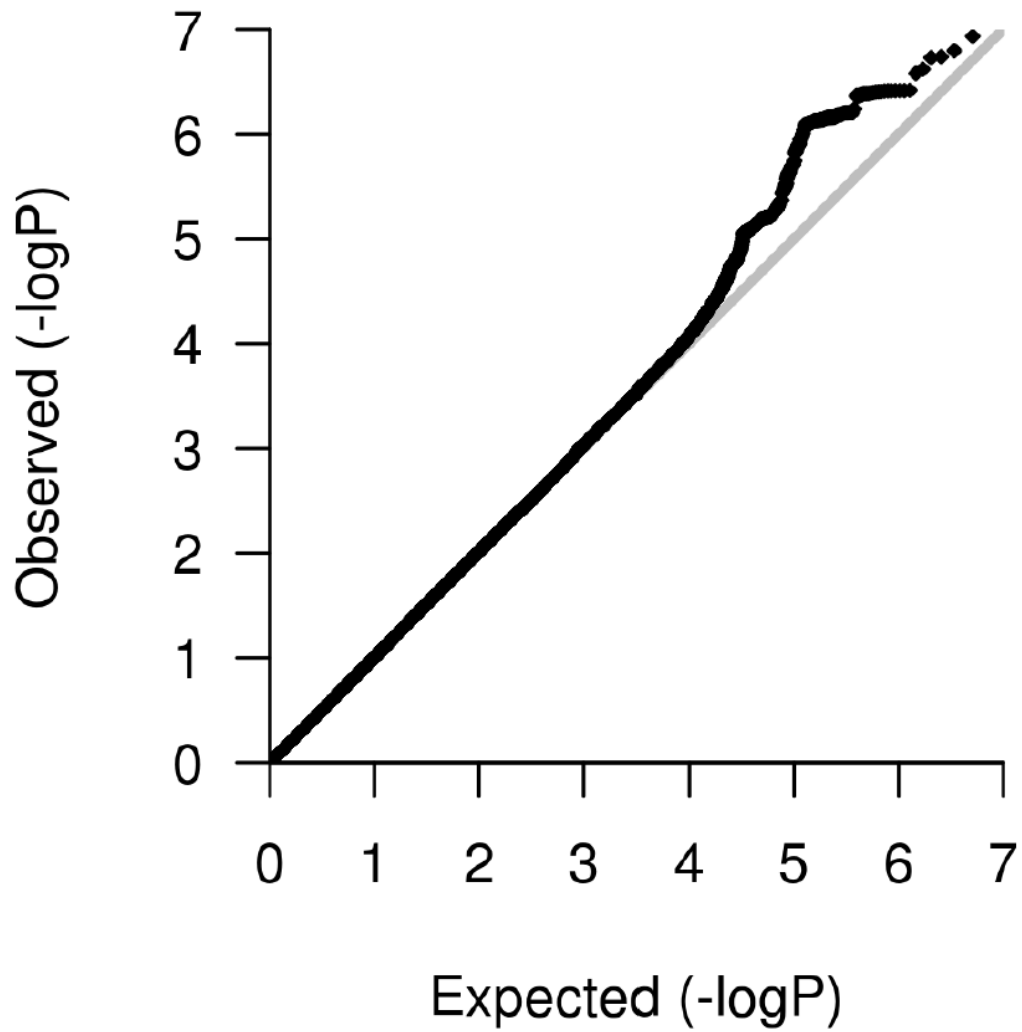

**Figure S103** QQ-plot for regulated on Activation, Normal T Cell Expressed and Secreted (RANTES; CCL5).



## QQ-plot for SCF

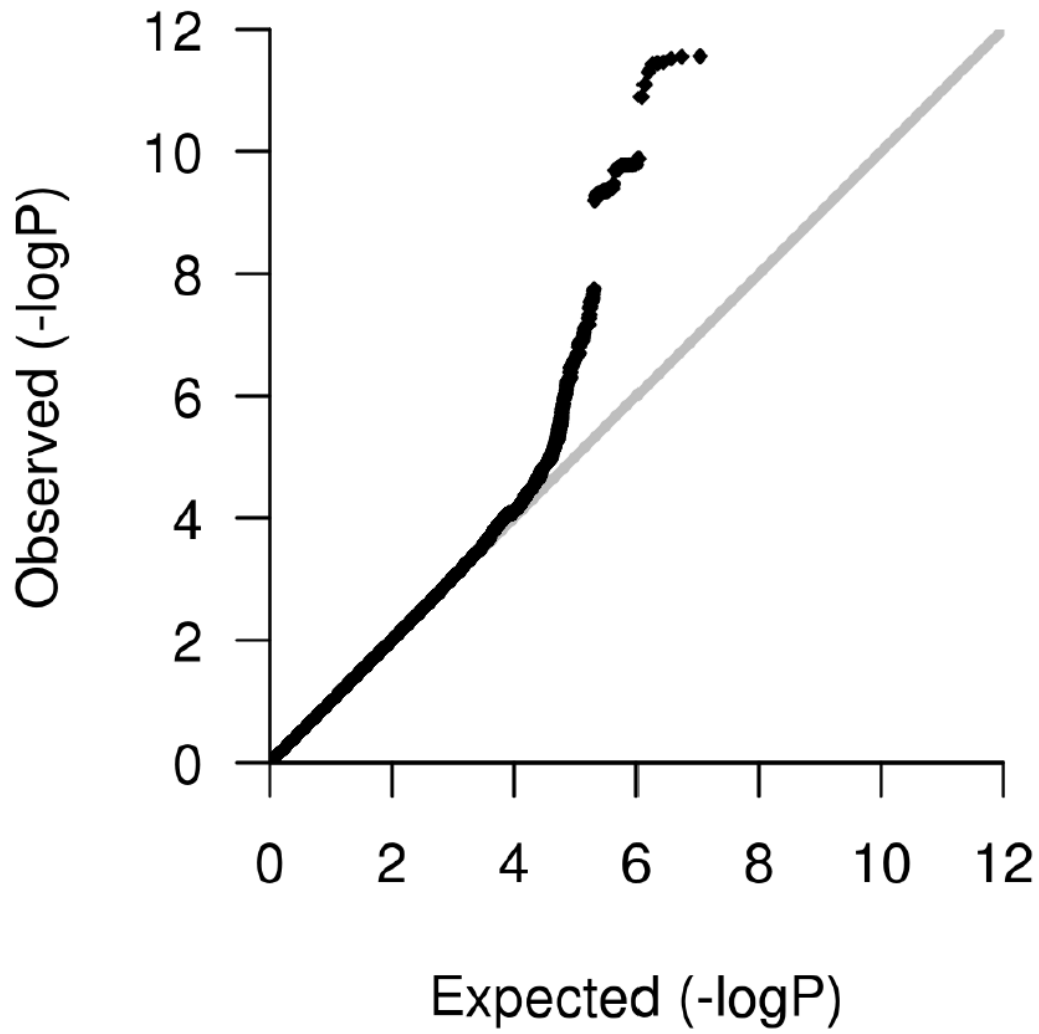

**Figure S104** QQ-plot for stem cell factor (SCF).

## QQ-plot for SCGFb

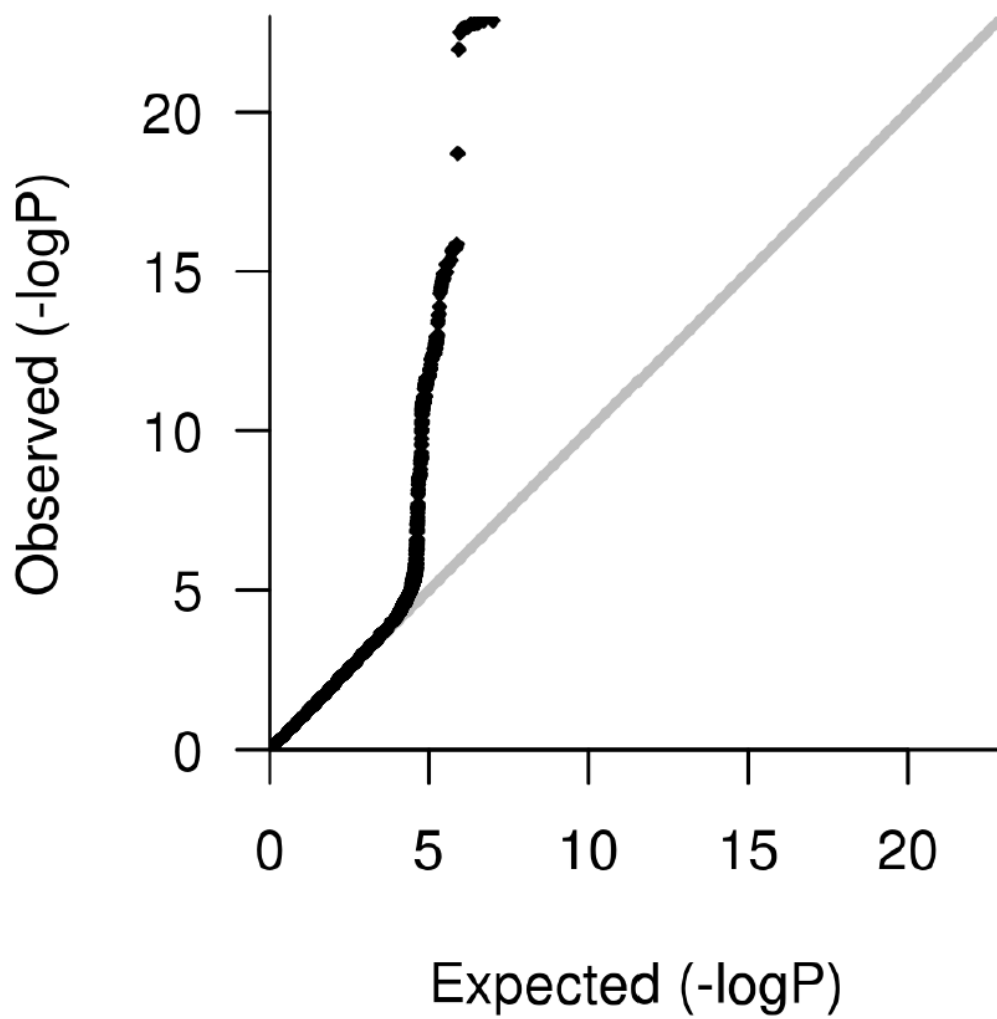

**Figure S105** QQ-plot for stem cell growth factor beta (SCGFb).

## QQ-plot for SDF1a

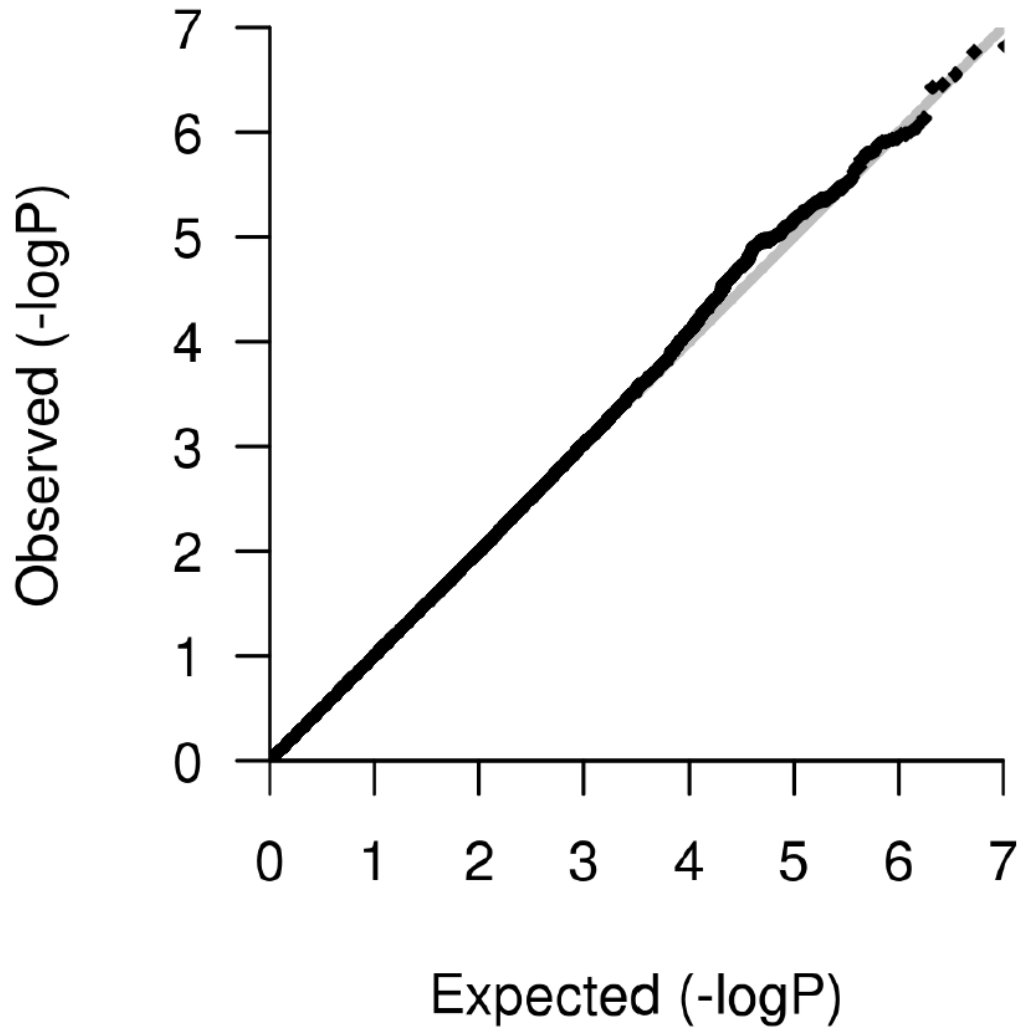

**Figure S106** QQ-plot for stromal cell-derived factor-1 alpha (SDF1a; CXCL12).

## QQ-plot for TNFa

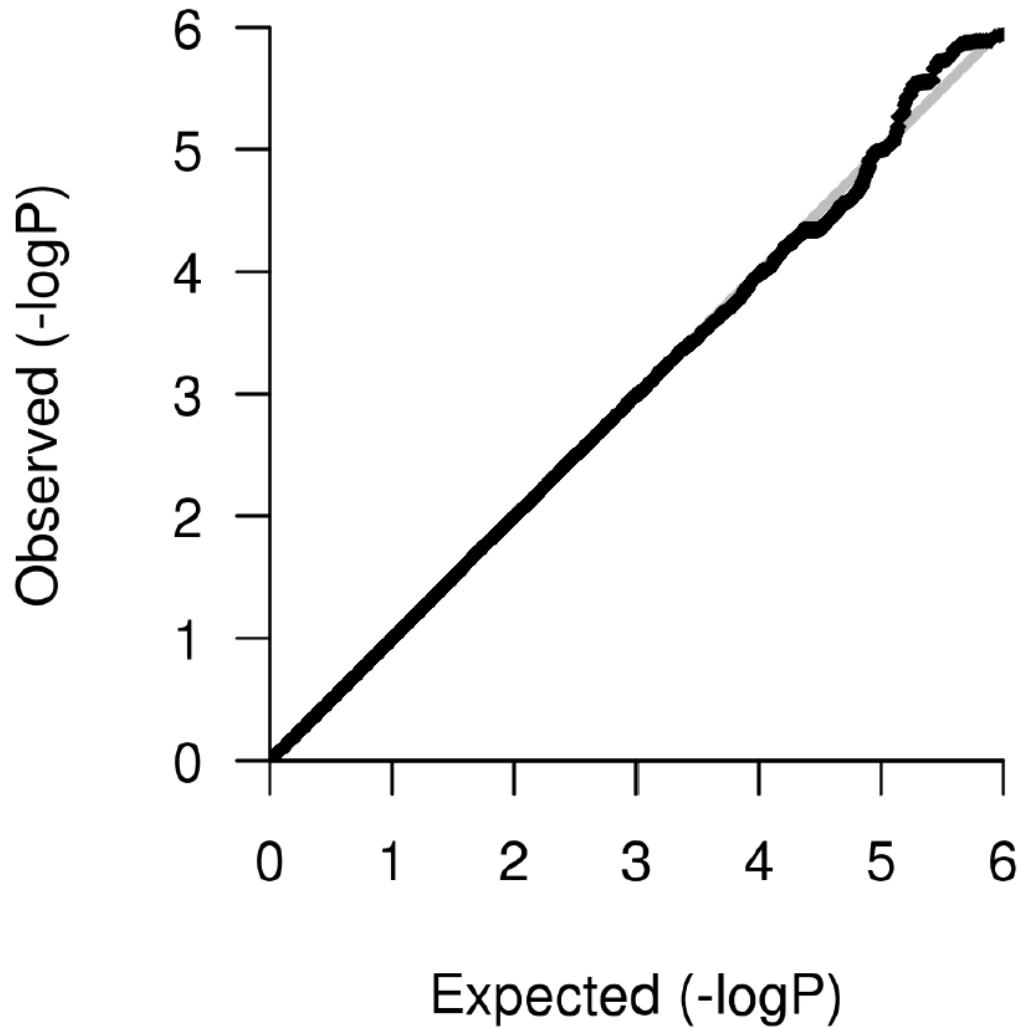

**Figure S107** QQ-plot for tumor necrosis factor-alpha (TNFa).

## QQ-plot for TNFb

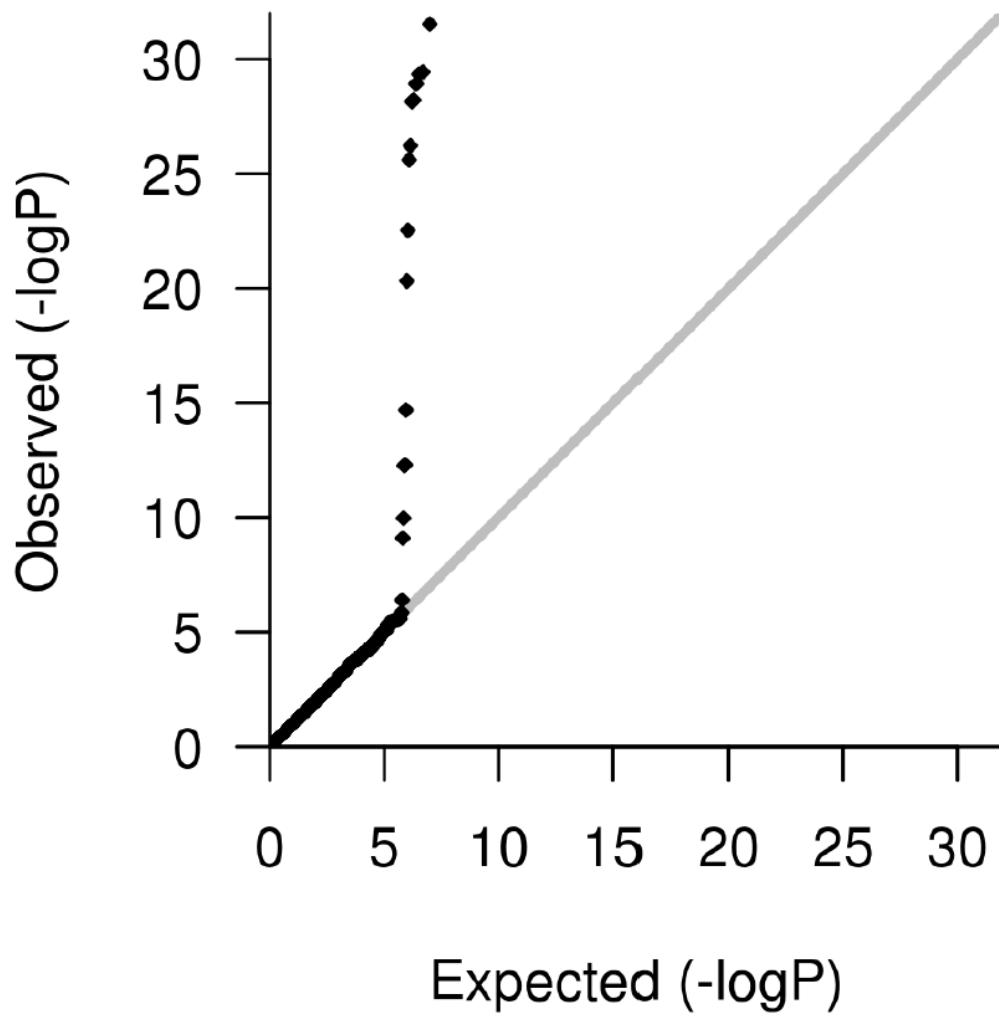

Figure S108 QQ-plot for tumor necrosis factor-beta (TNFb).

## QQ-plot for TRAIL

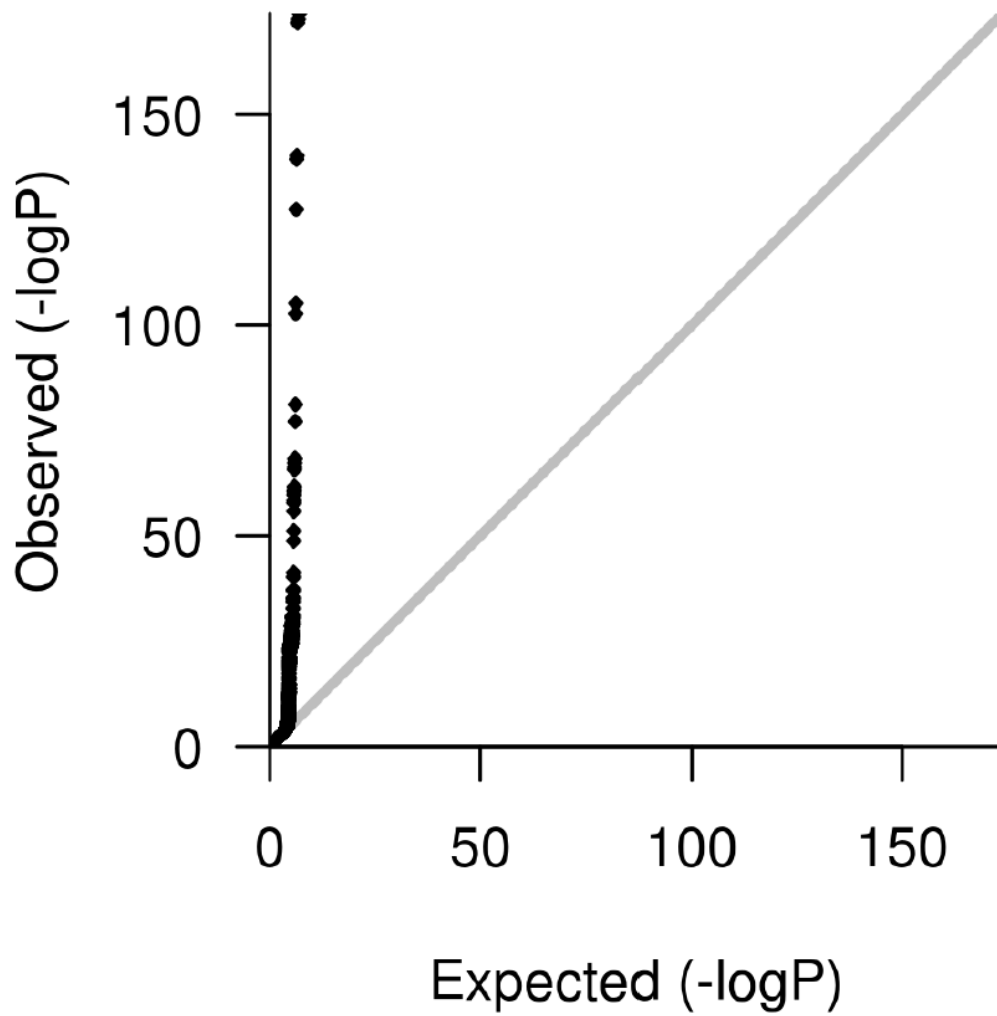

**Figure S109** QQ-plot for TNF-related apoptosis inducing ligand (TRAIL).

## QQ-plot for VEGF

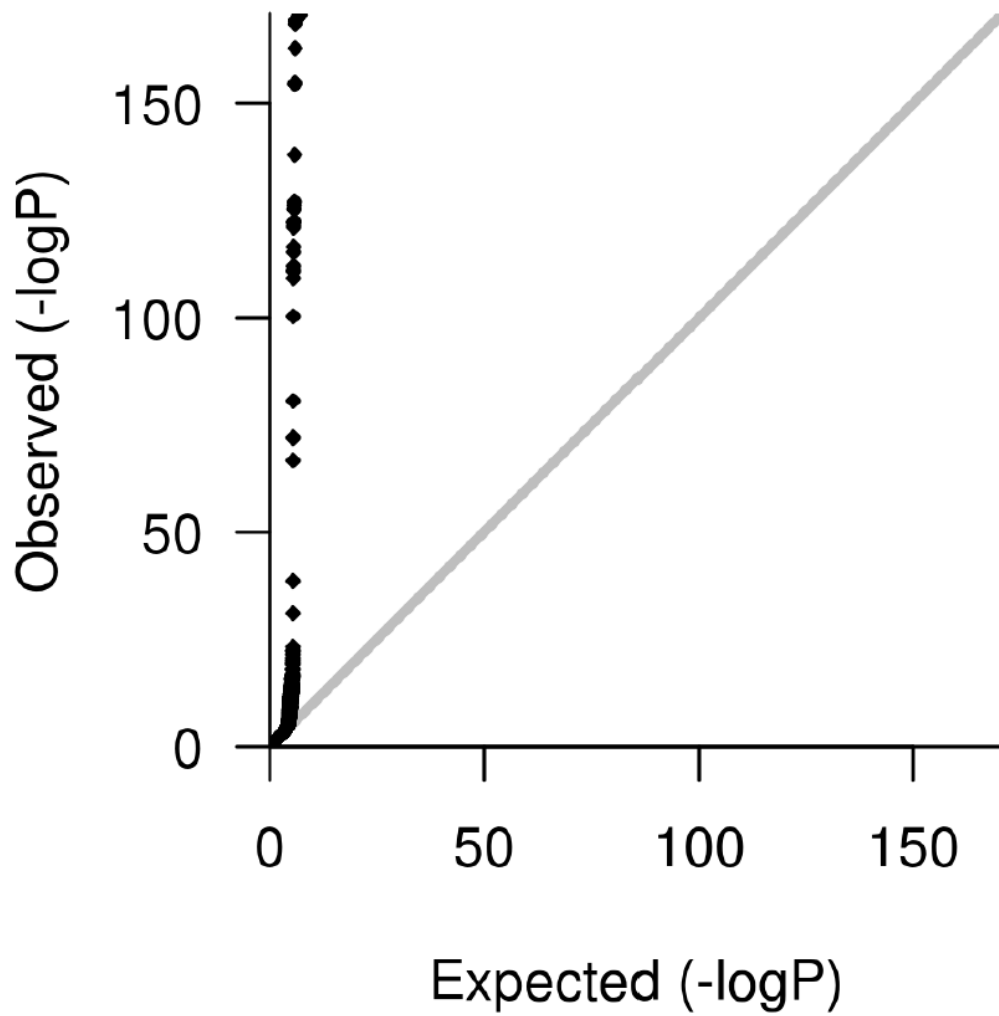

**Figure S110** QQ-plot for vascular endothelial growth factor (VEGF).

### CTACK - rs201003839

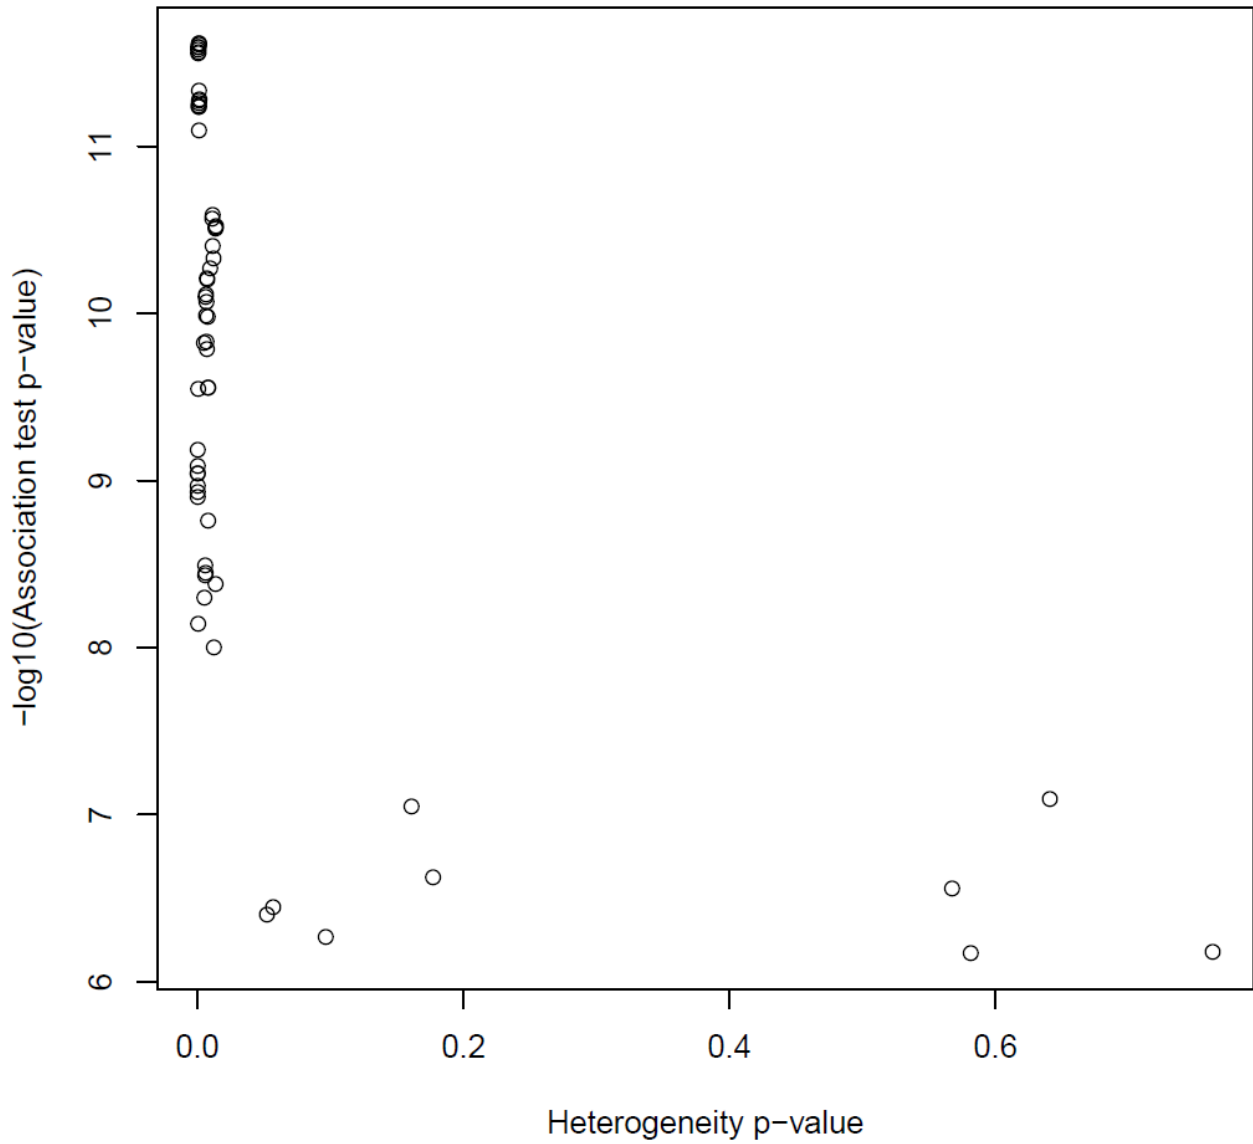

**Figure S111** Heterogeneity plot for cutaneous T-cell attracting (CTACK; CCL27). Meta-analysis p-value is depicted on y-axis and heterogeneity p-value on x-axis.



### CTACK - rs2070074

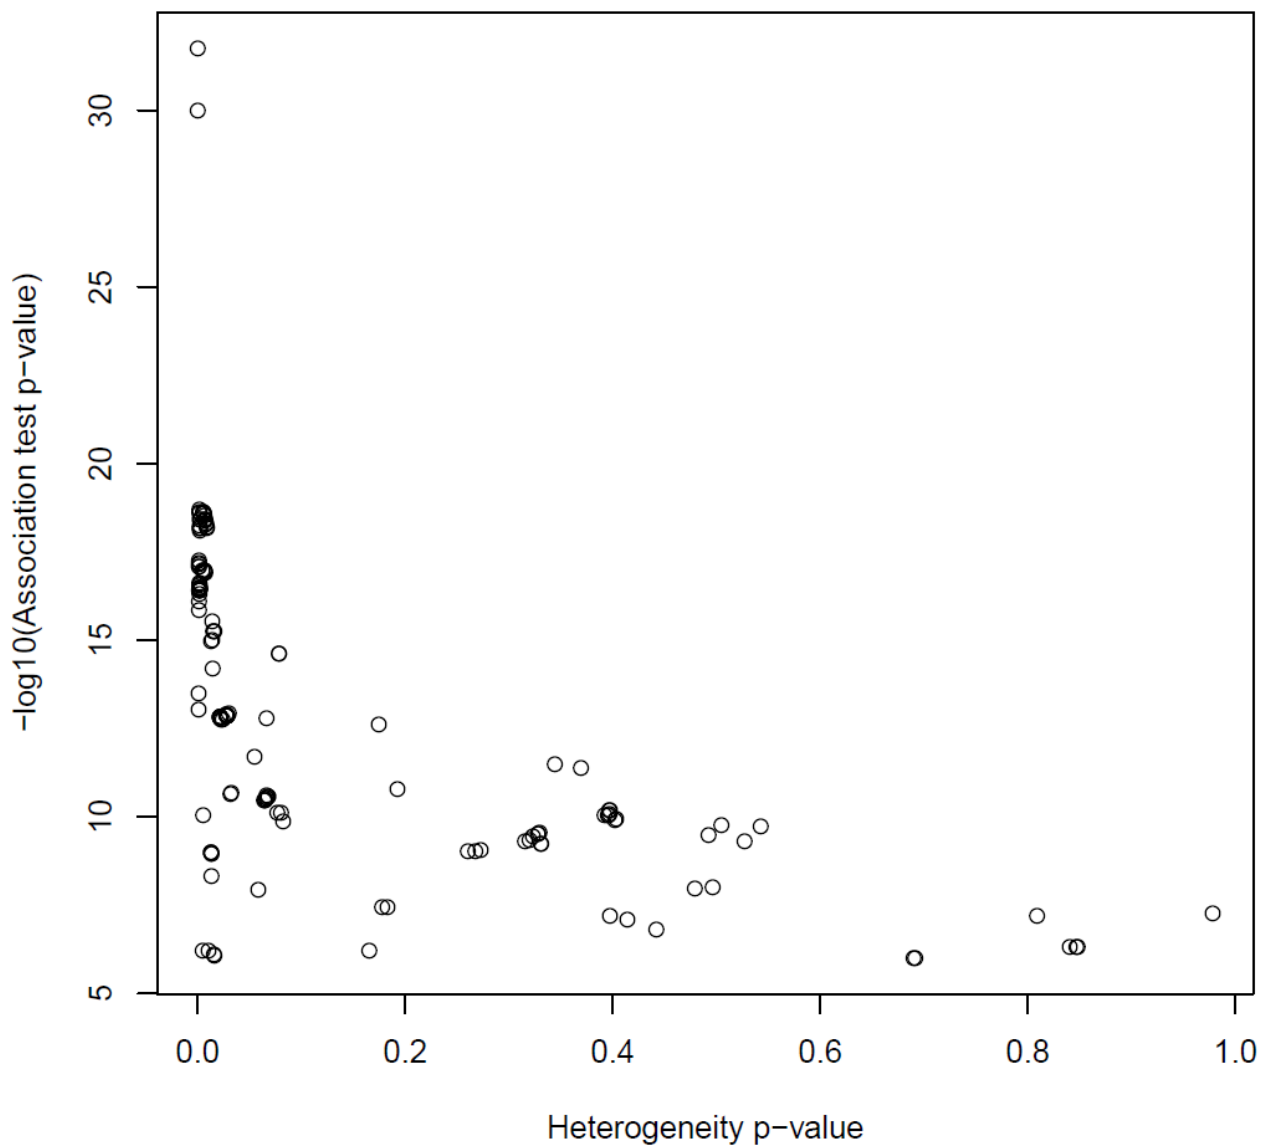

**Figure S112** Heterogeneity plot for cutaneous T-cell attracting (CTACK; CCL27). Meta-analysis p-value is depicted on y-axis and heterogeneity p-value on x-axis. In 9p13.3, where the rs2070074 resides, exist SNPs without heterogeneity (Cochrane Q-test heterogeneity p-value > 0.1) and with significant association test p-value (less than  $1.2 \times 10^{-9}$ ).

### GROa - rs508977

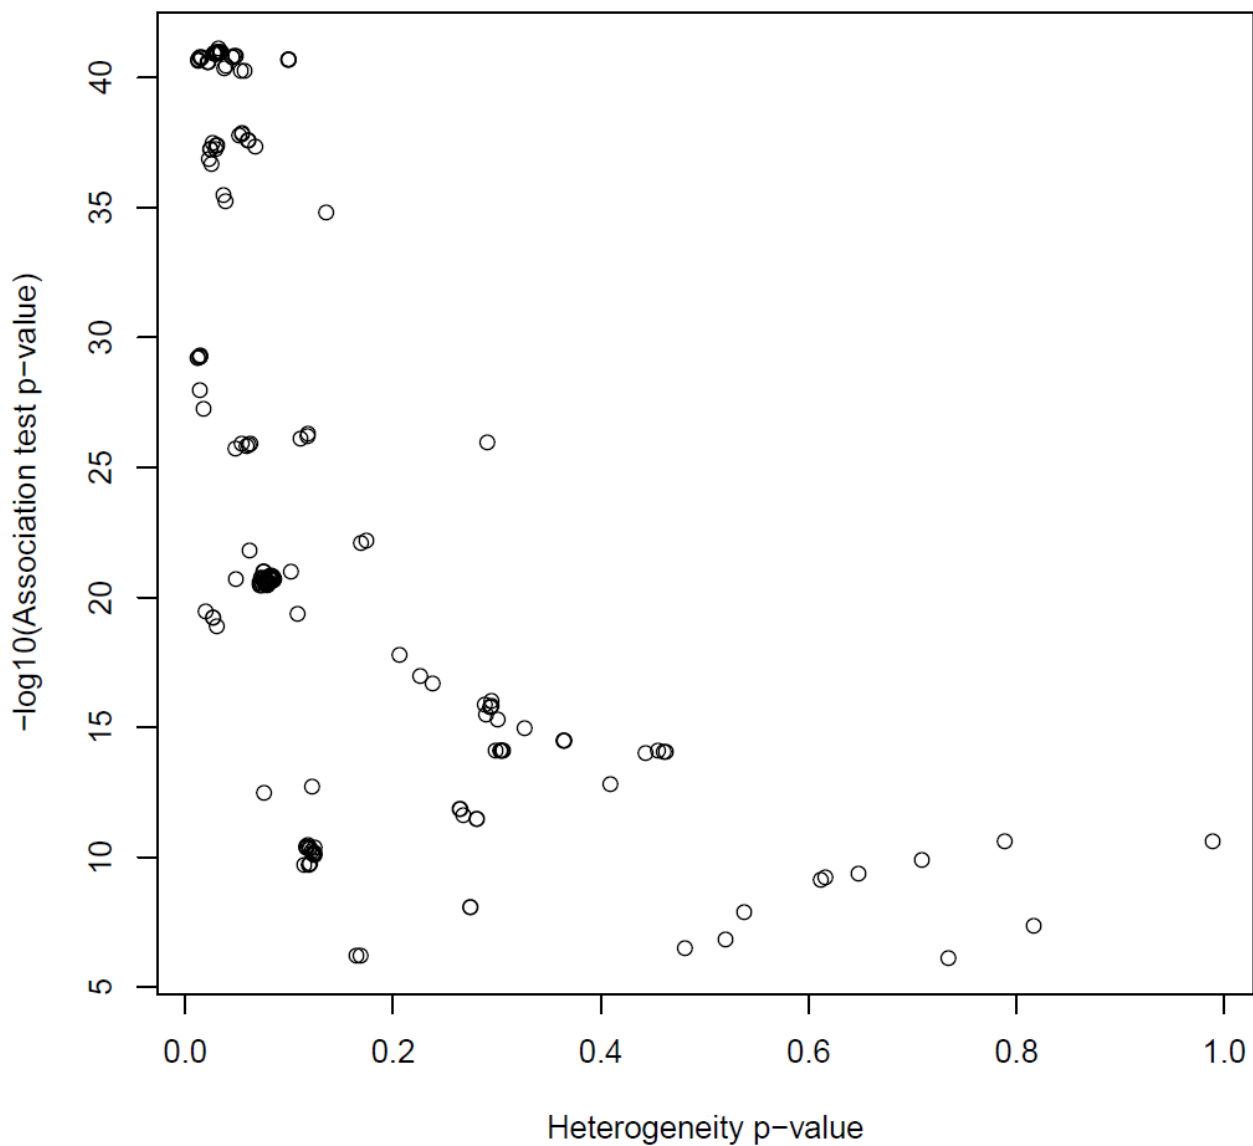

**Figure S113** Heterogeneity plot for growth regulated oncogene- $\alpha$  (GROa; CXCL1) from 4q13.3. The lead SNP rs508977 has heterogeneity across the involved cohort but the locus contains SNPs with significant association test p-value and no heterogeneity.

## IL-18 – rs385076

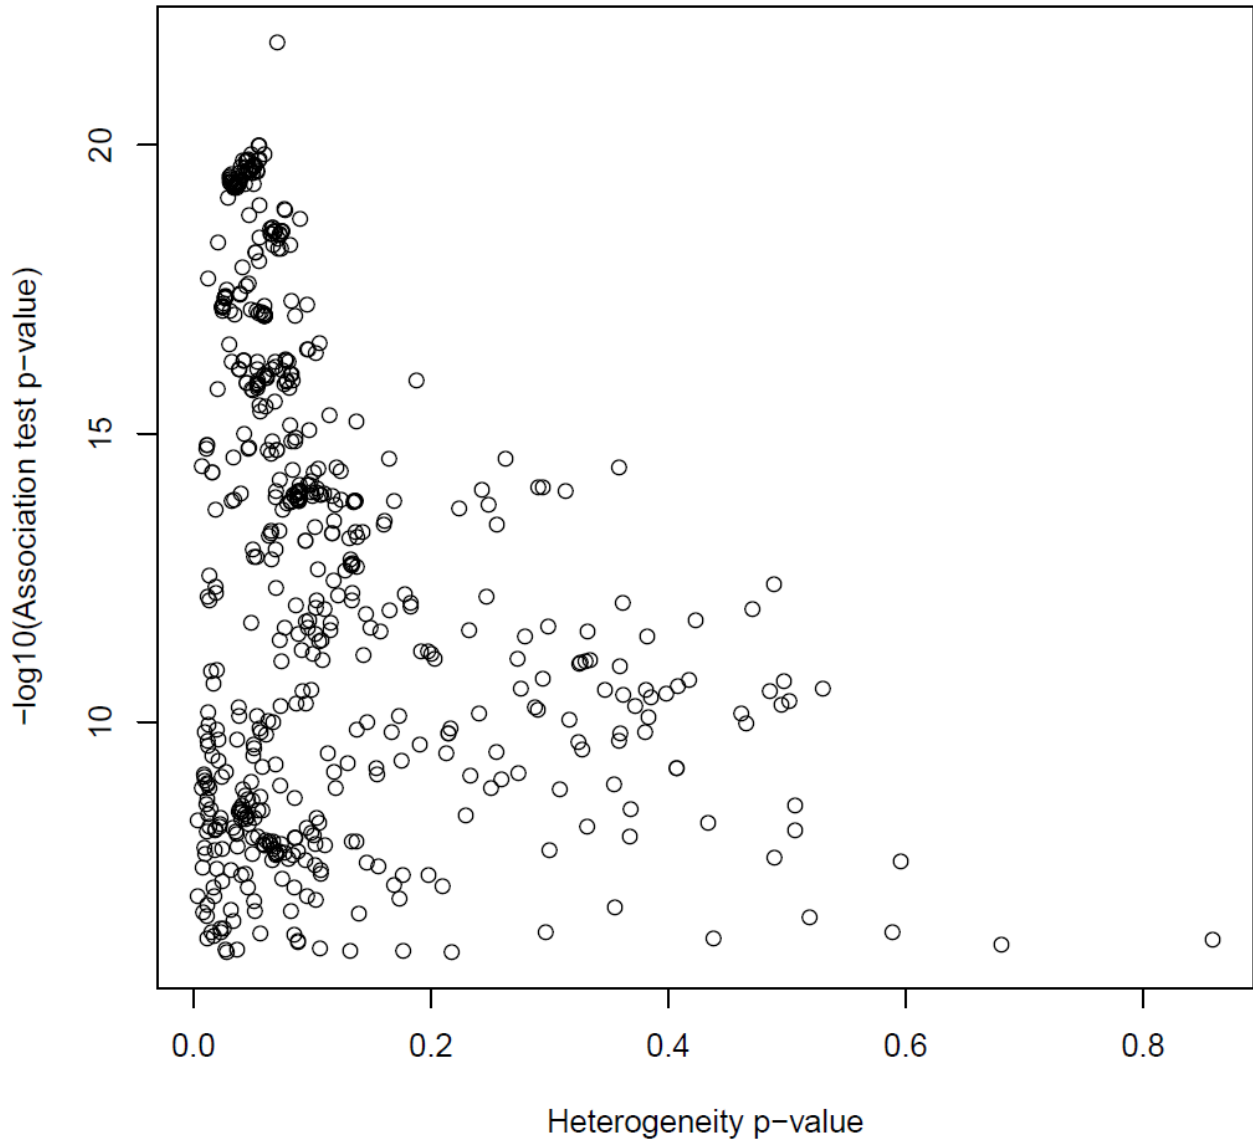

**Figure S114** Heterogeneity plot for interleukin-18 (IL-18) in 2p22.3. The lead SNP rs385076 has low degree of heterogeneity in meta-analysis (heterogeneity p-value 0.07). However, the locus contains significant SNPs without heterogeneity.

### MCP1 - rs12075

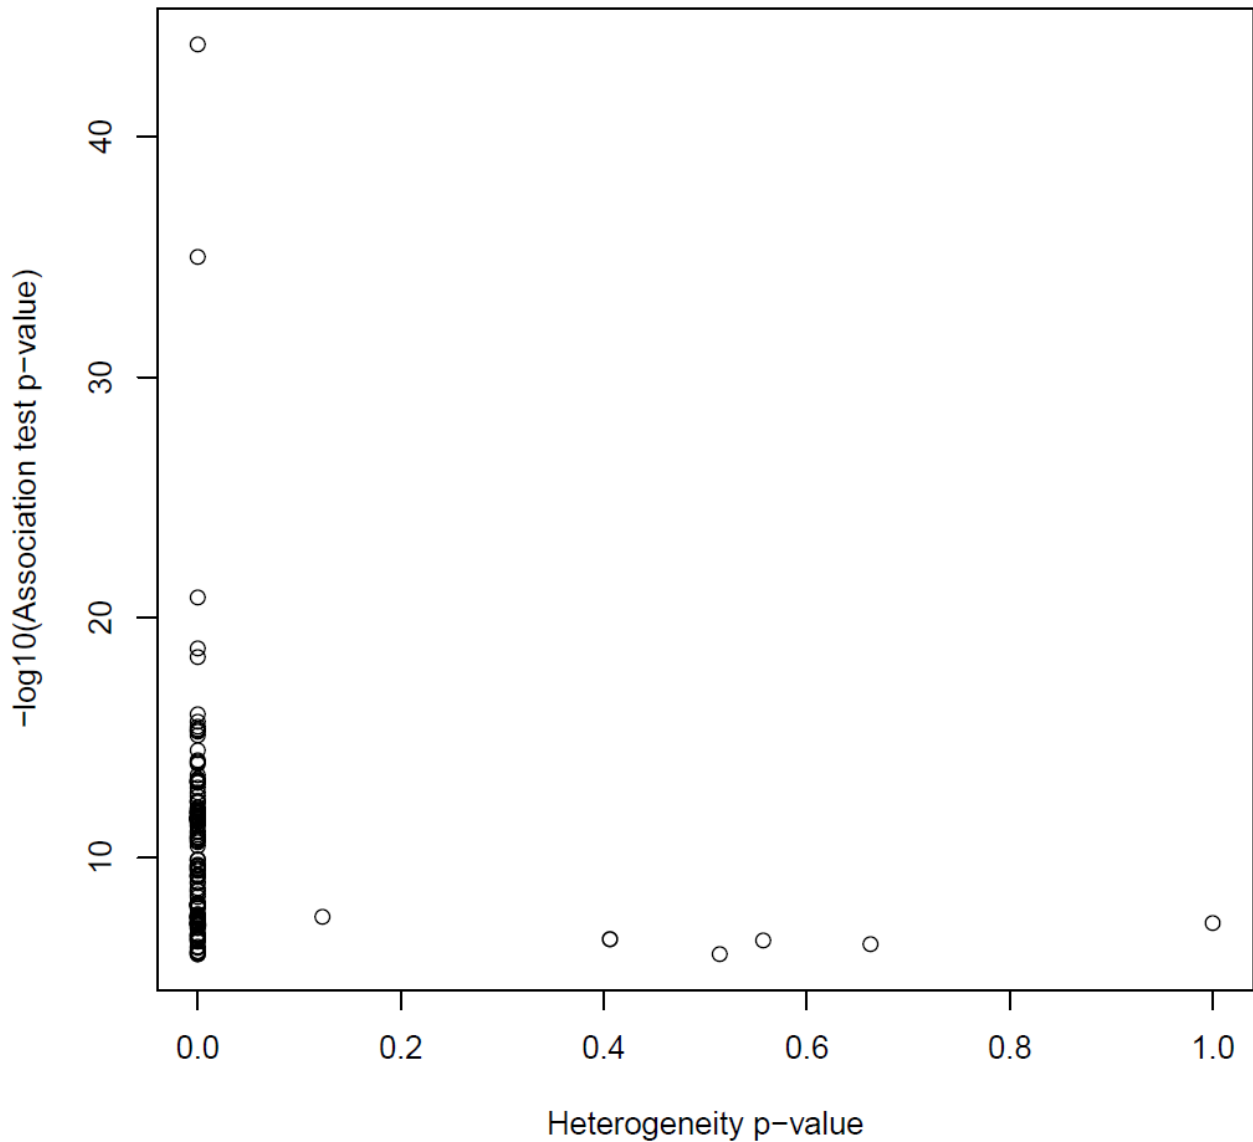

**Figure S115** Heterogeneity plot monocyte chemotactic protein-1 (MCP1; CCL2). The heterogeneity is likely explained by differences in sample processing. The cytokine quantification was performed from EDTA plasma in FINRISK1997, from heparin plasma in FINRISK2002 and from serum in YFS.

### MIP1b - rs113877493

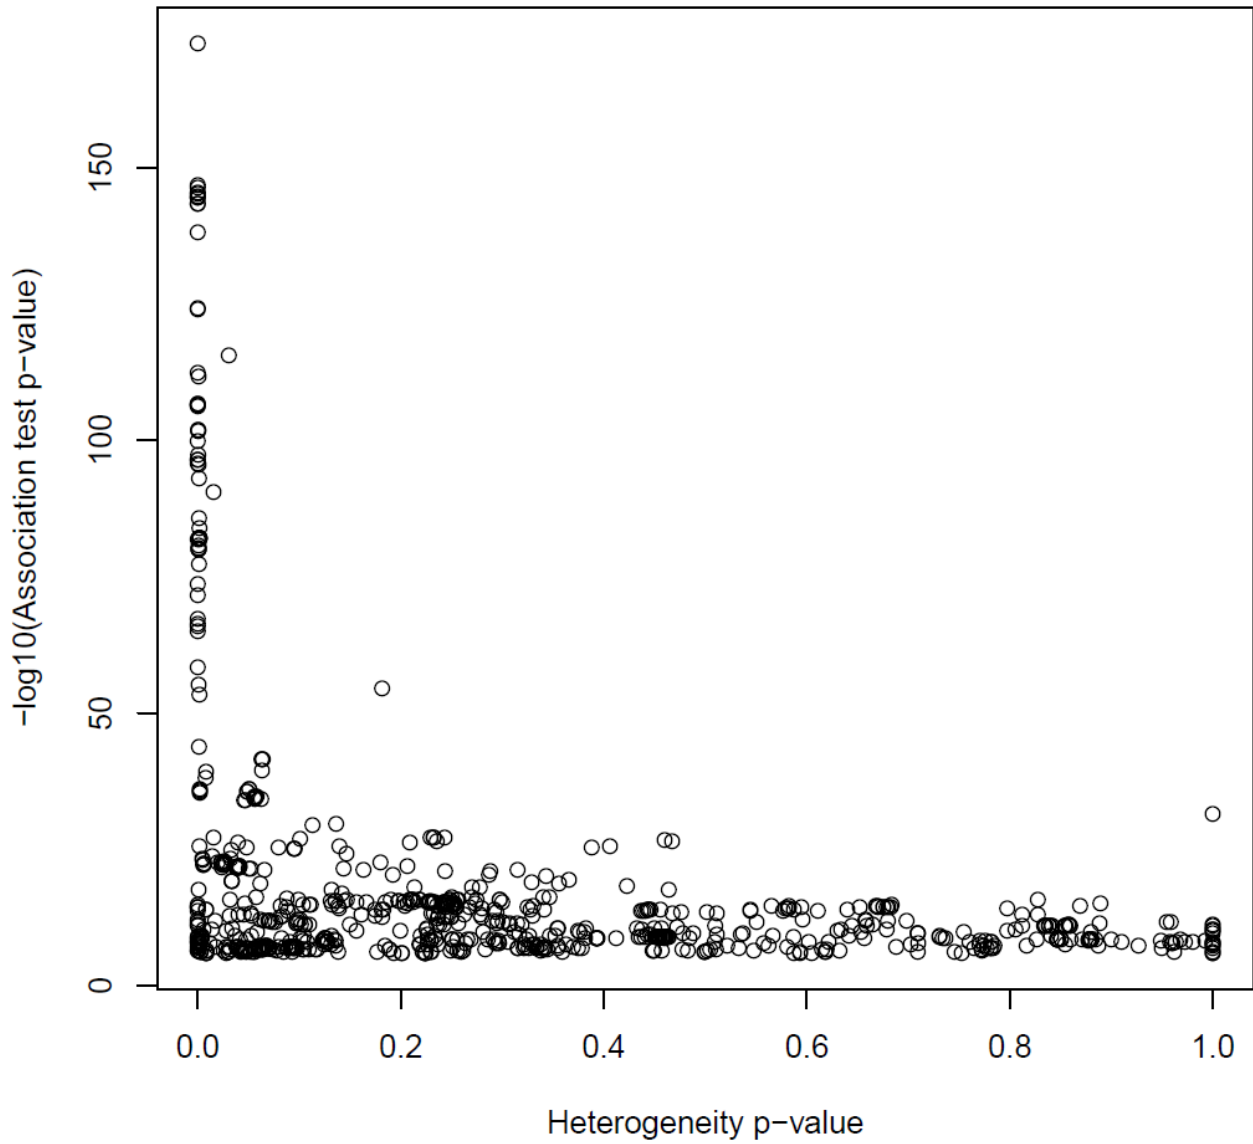

**Figure S116** Heterogeneity plot for macrophage inflammatory protein-1 $\beta$  (MIP1b; CCL4).

PDGFbb - rs13412535

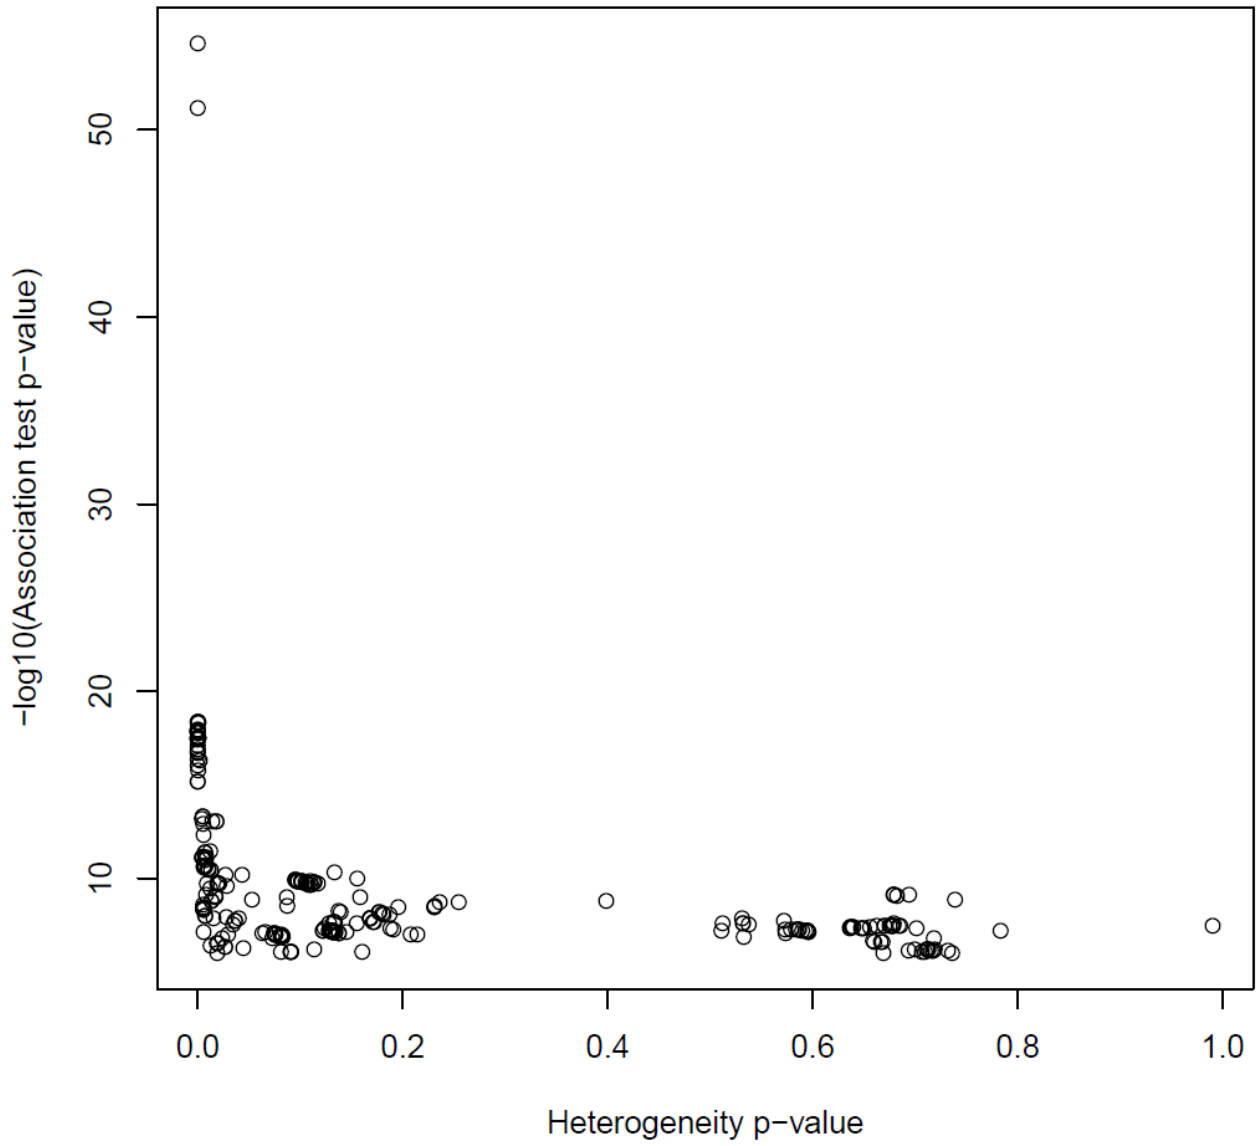

Figure S117 Heterogeneity plot for platelet derived growth factor BB (PDGFbb).

### PDGFbb - rs4965869

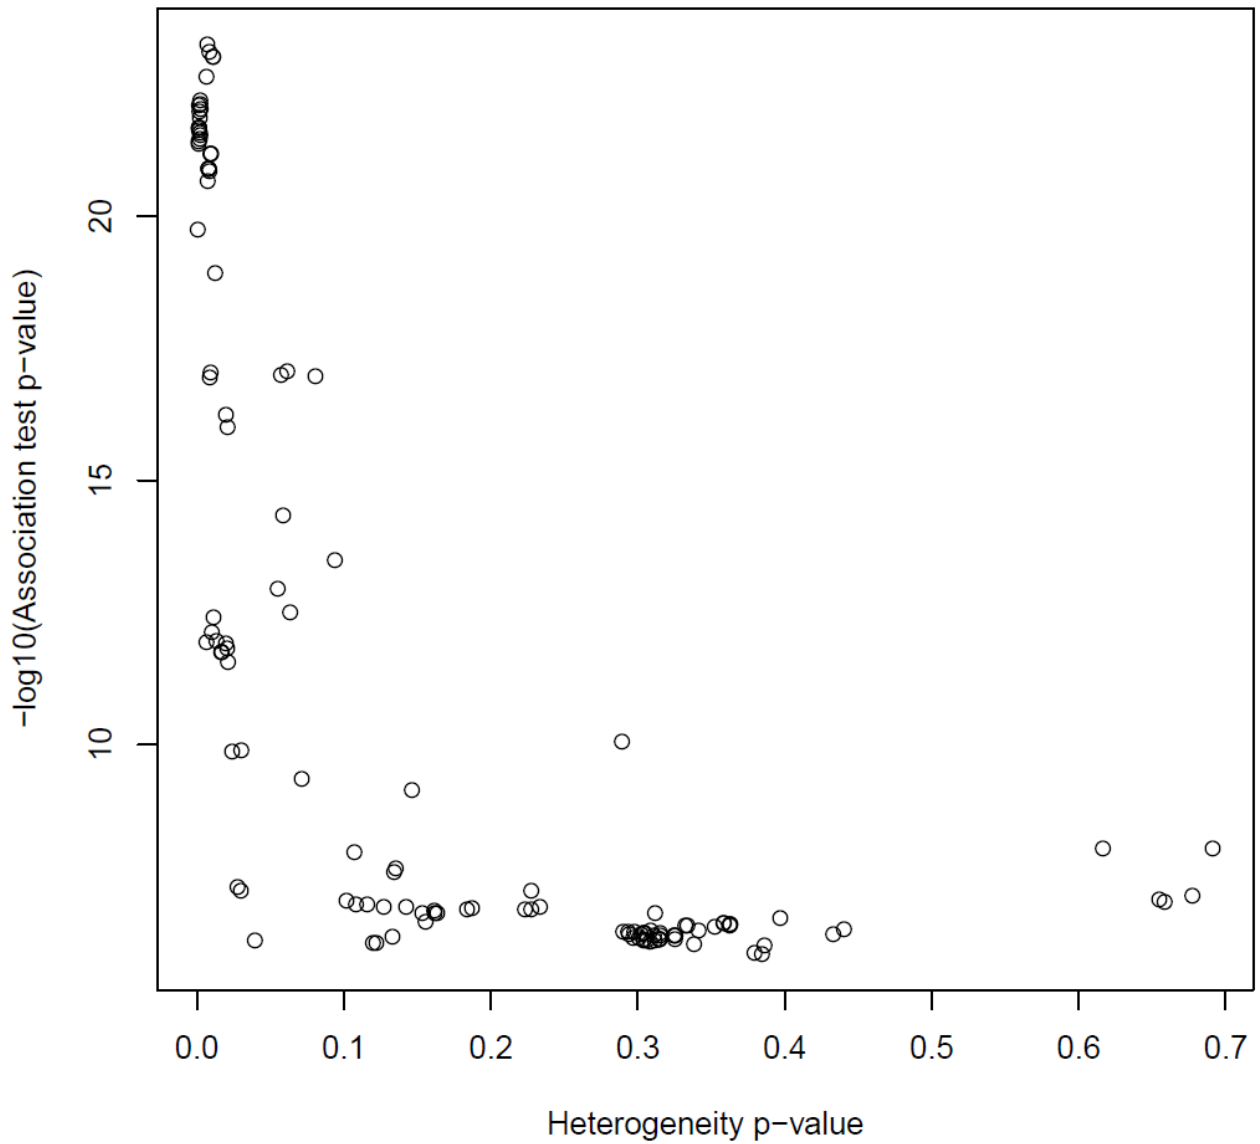

**Figure S118** Heterogeneity plot for platelet derived growth factor BB (PDGFbb) from 15q26.3.

The locus contains significant associations without heterogeneity.

SCGFb - rs116924815

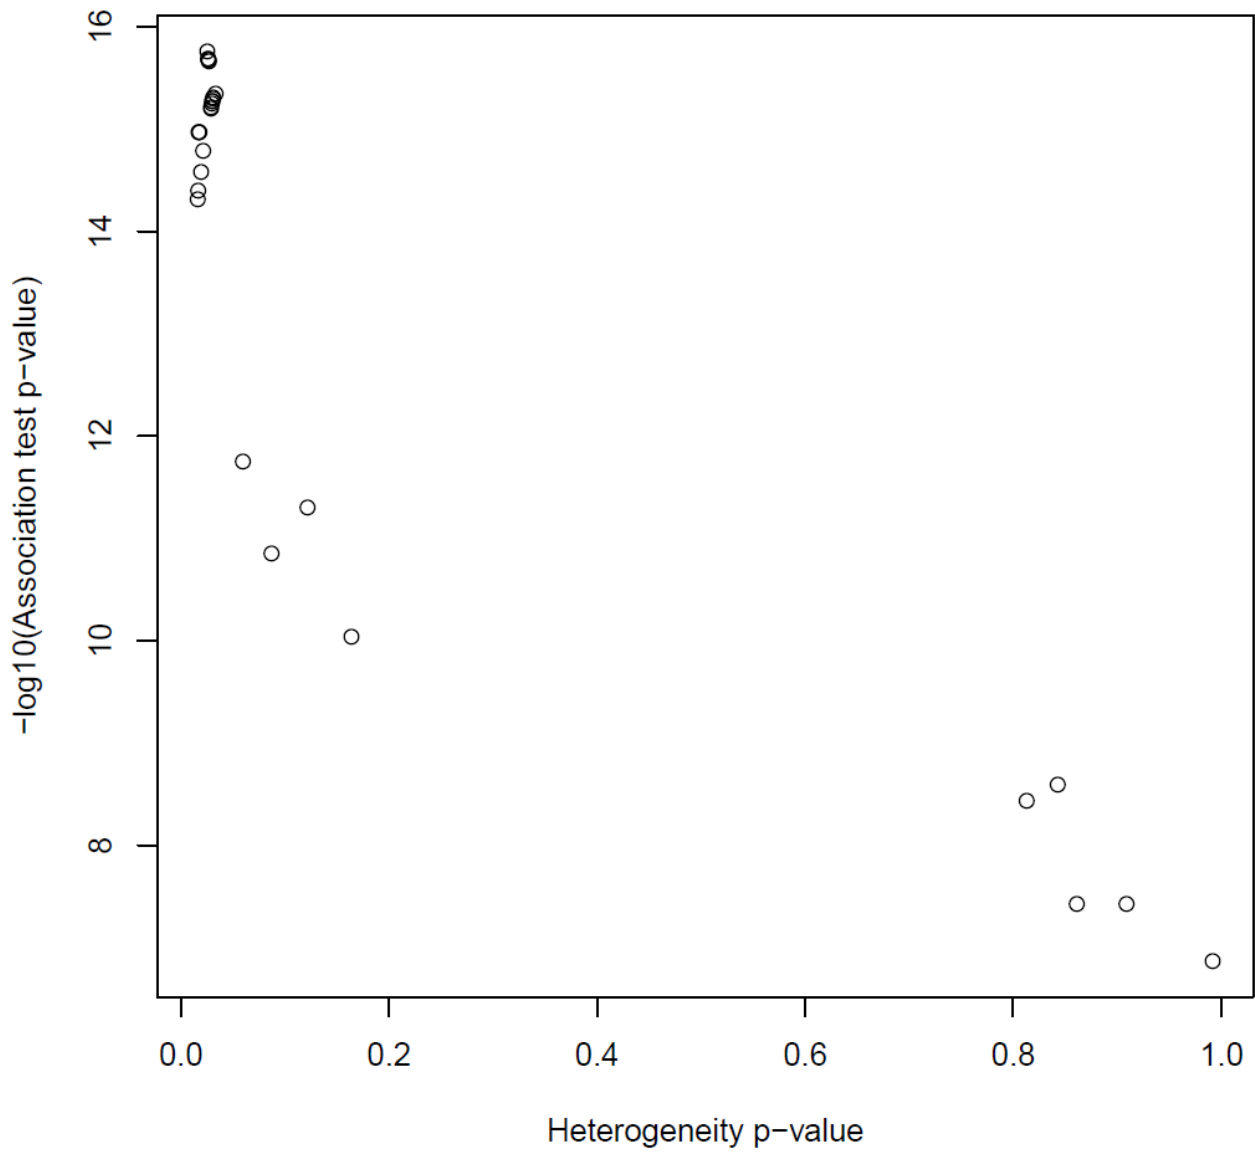

Figure S119 Heterogeneity plot for stem cell growth factor beta (SCGFb) from 19q13.33.



### SCGFb - rs187503377

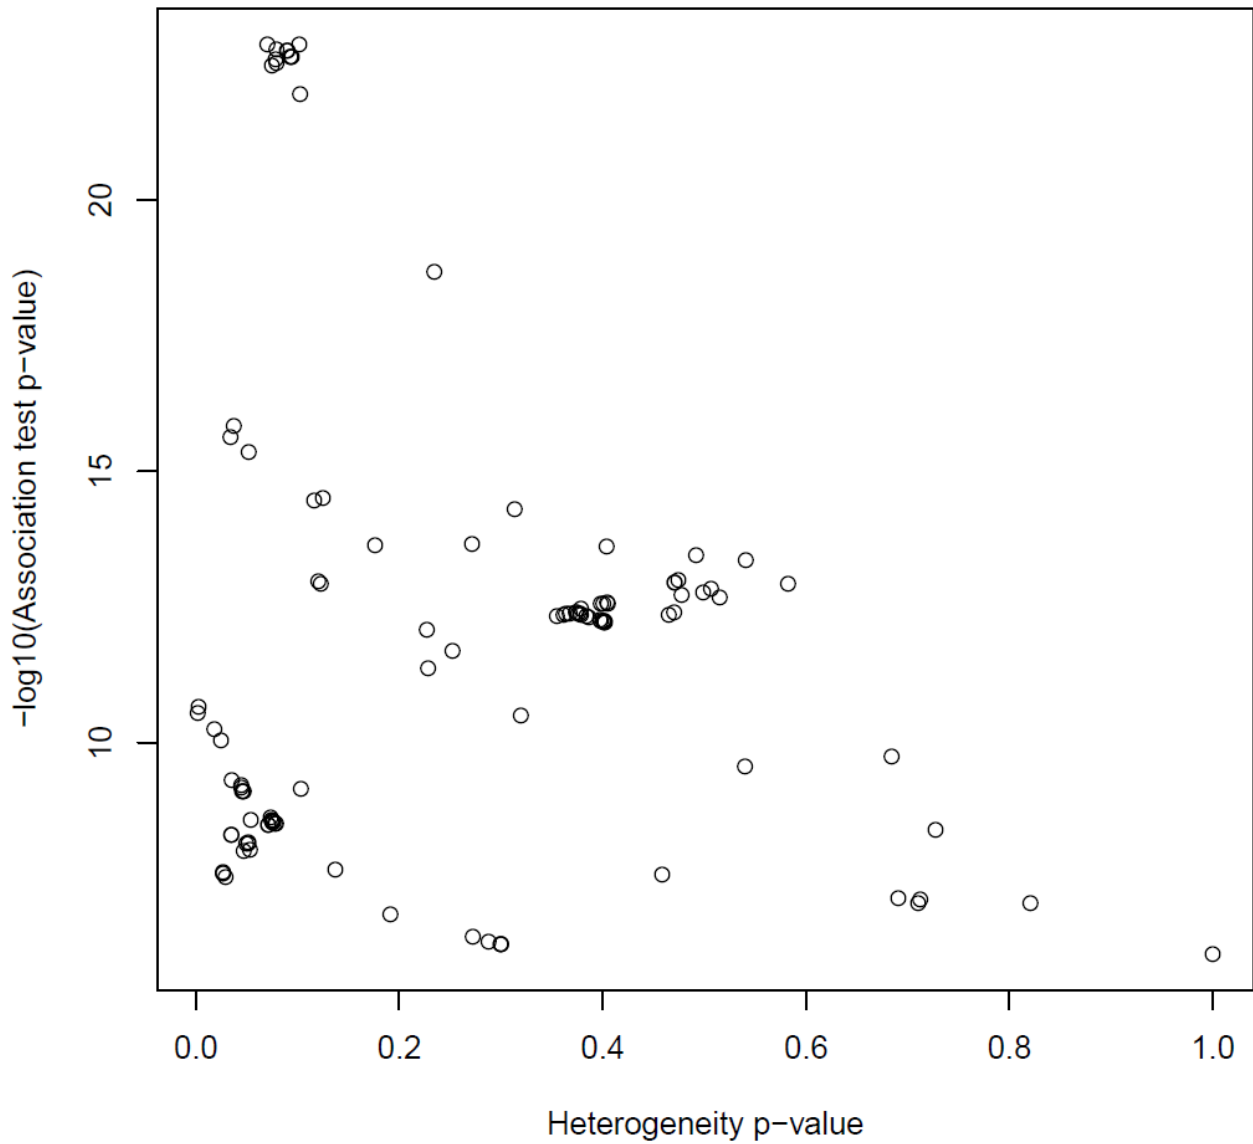

**Figure S120** Heterogeneity plot for stem cell growth factor beta (SCGFb). The association between SCGFb and lead SNP rs187503377 is heterogenic across cohorts. However, the locus contains multiple significant SNPs without heterogeneity.

SCGFb - rs4656185

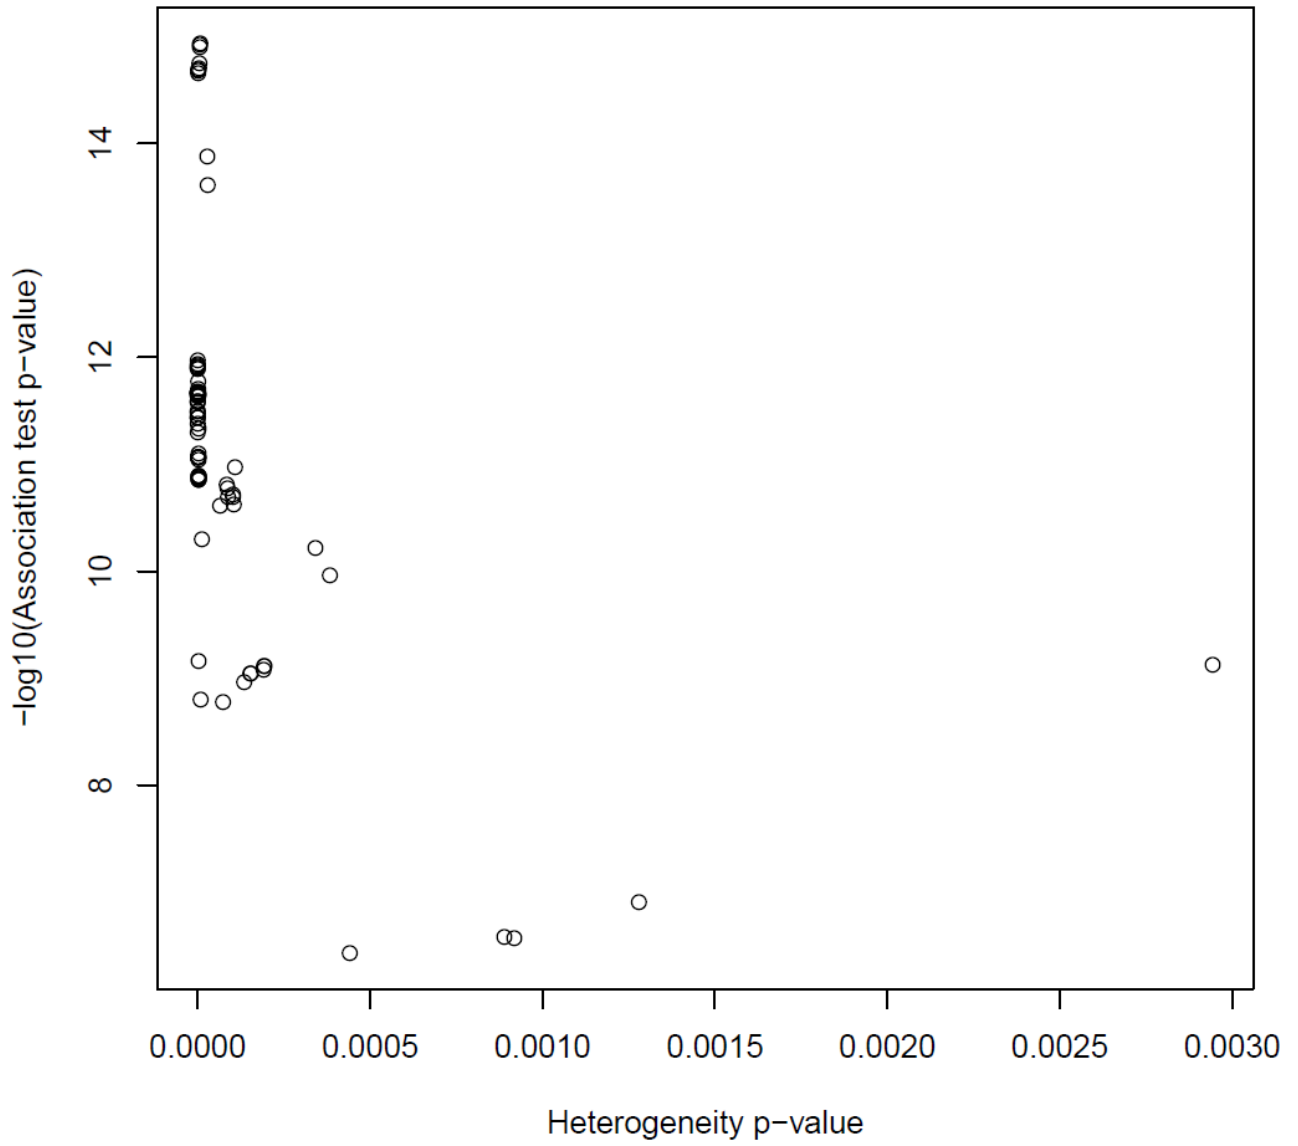

Figure S121 Heterogeneity plot for stem cell growth factor beta (SCGFb) from 1q24.2

TRAIL - rs192989810

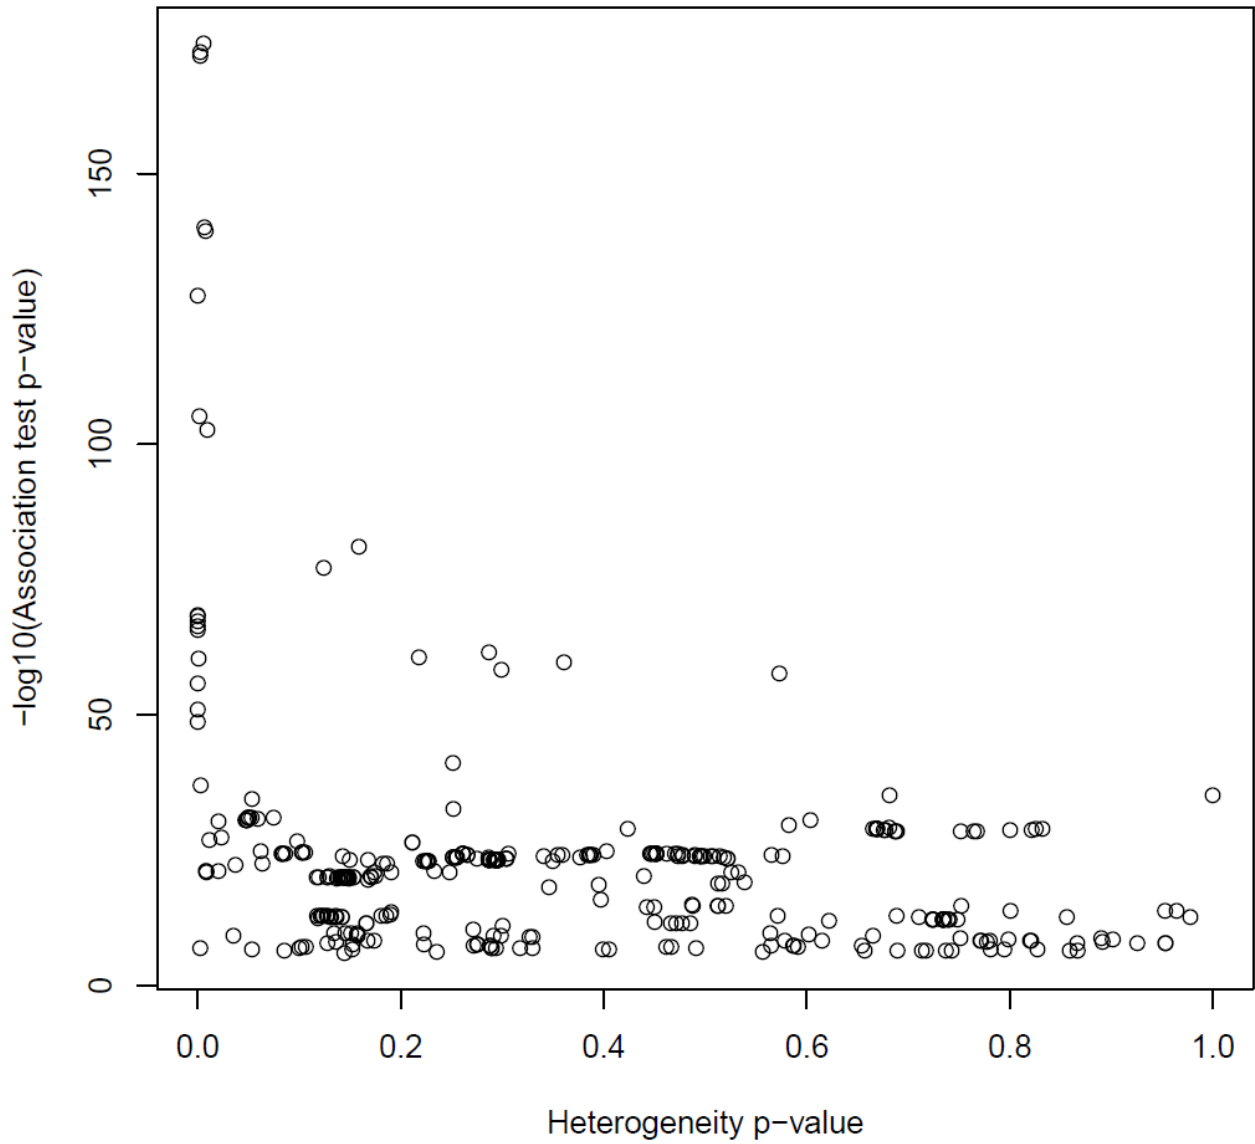

Figure S122 Heterogeneity plot for TNF-related apoptosis inducing ligand (TRAIL).

### VEGF - rs6921438

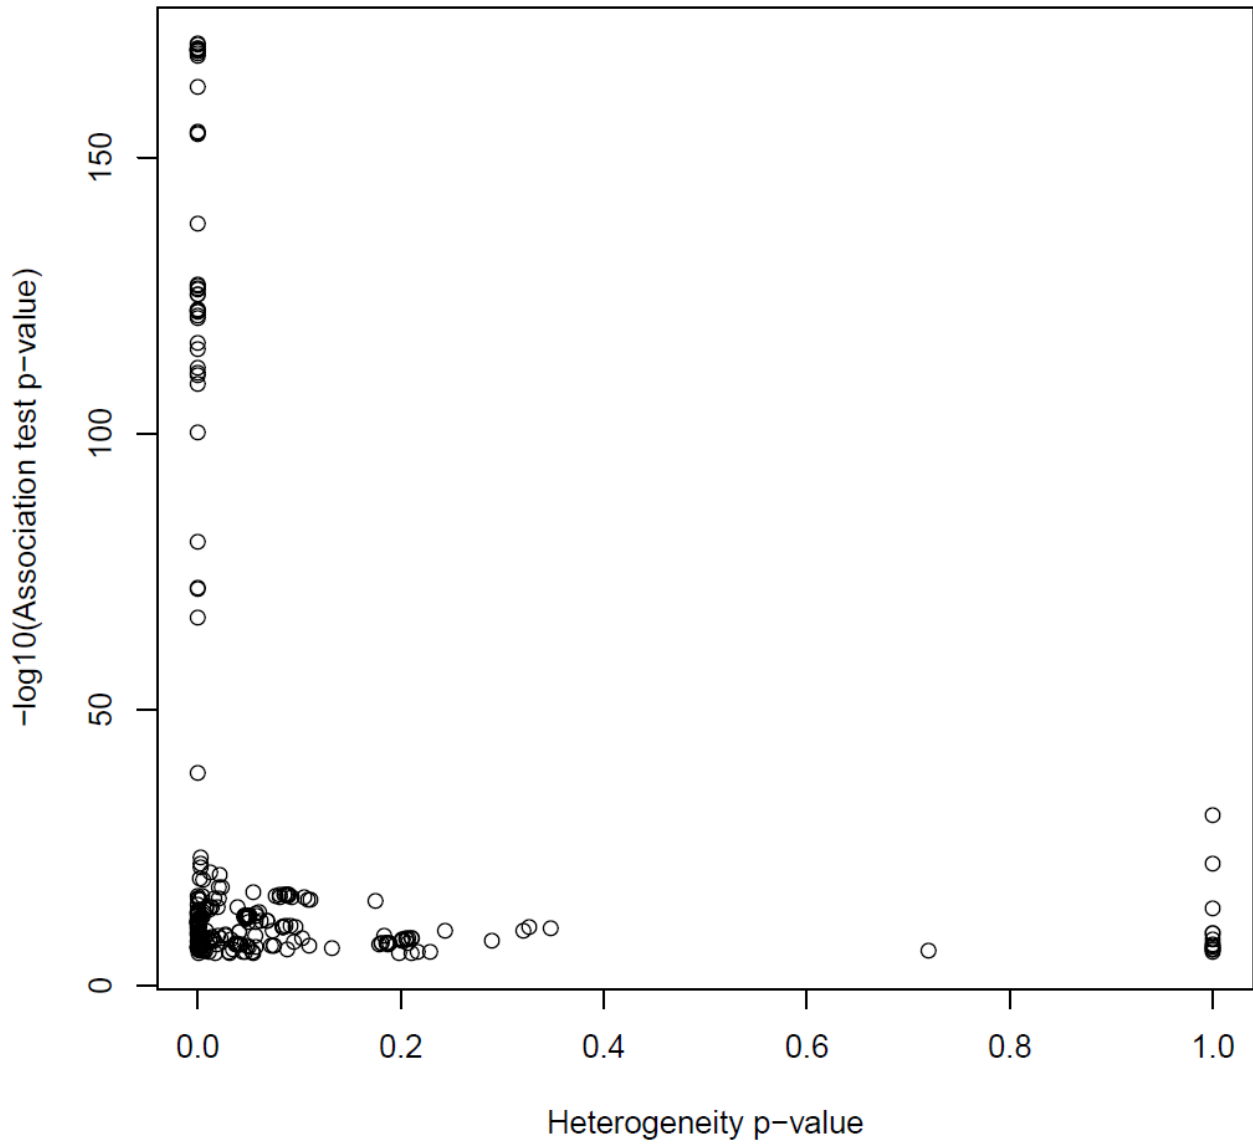

**Figure S123** Heterogeneity plot for vascular endothelial growth factor. The SNP is located in 6p21.1.

### VEGF - rs7030781

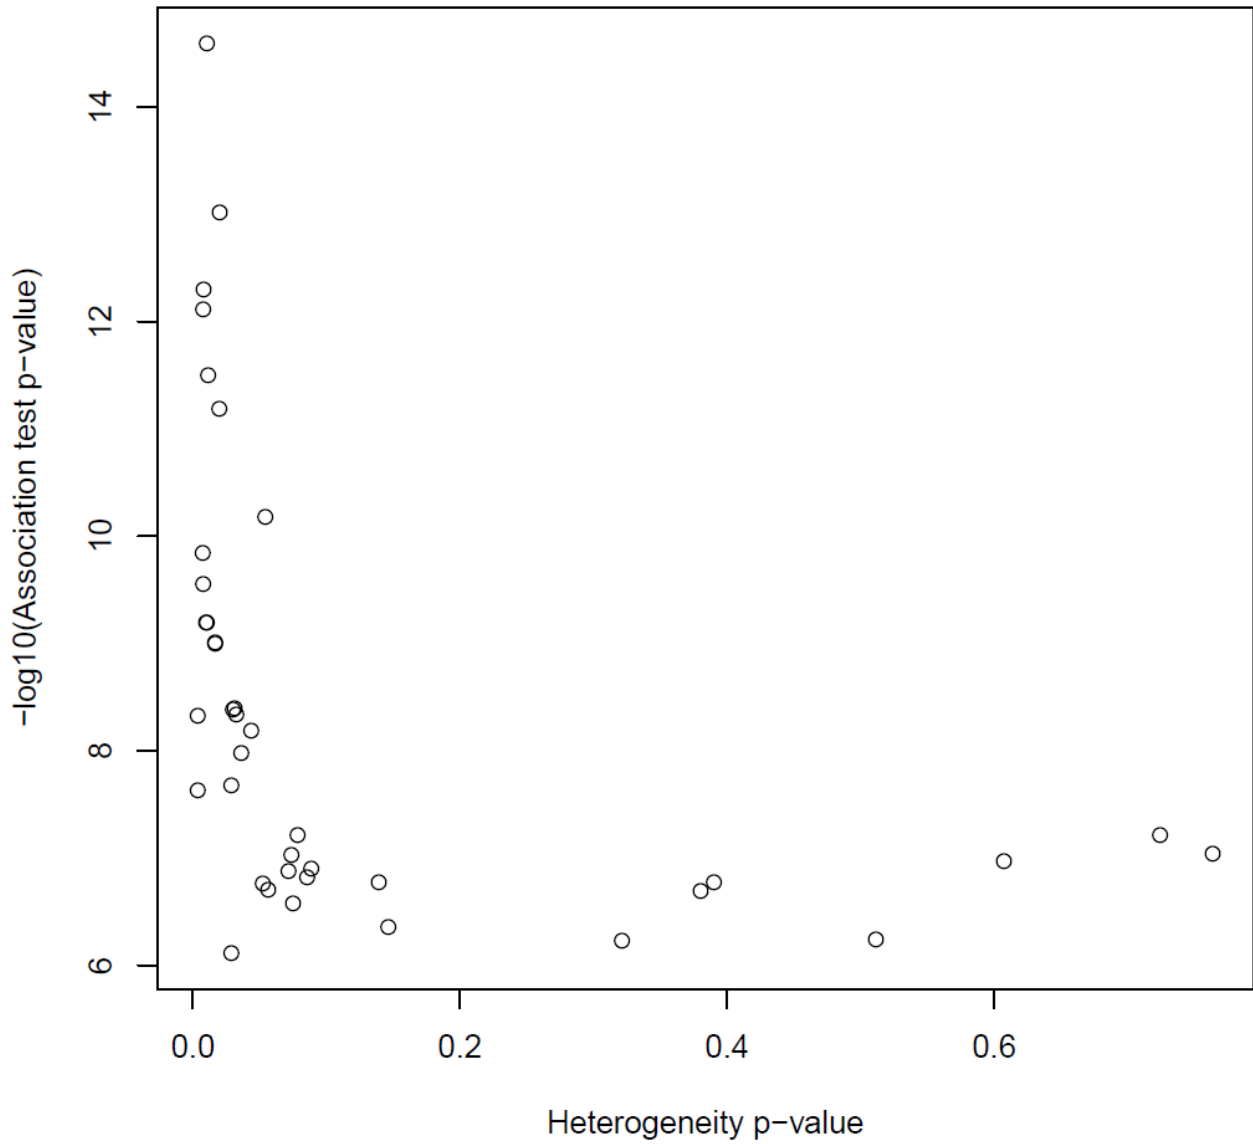

**Figure S124** Heterogeneity plot for vascular endothelial growth factor (VEGF). No significant SNPs (association test p-value  $< 1.2 \times 10^{-9}$ ) without heterogeneity can be found from this locus (9p24.2).

**Table S2** Results from random effects meta-analysis for SNPs with heterogeneity p-value < 0.1 in Table 1

| <b>Cytokine</b> | <b>rs-id</b> | <b>Beta</b> | <b>SE</b>       | <b>P-value</b> |
|-----------------|--------------|-------------|-----------------|----------------|
| CTACK           | rs201003839  | 0.181       | 0.0740          | 0.0147         |
| CTACK           | rs2070074    | -0.430      | 0.1342          | 0.0013         |
| Eotaxin         | rs2228467    | 0.389       | 0.0566          | 6.72E-12       |
| GROa            | rs508977     | 0.376       | 0.0447          | 4.57E-17       |
| IL-18           | rs385076     | 0.246       | 0.0196          | 5.55E-36       |
| MCP1            | rs12075      | 0.267       | 0.2168          | 0.2172         |
| MIP1b           | rs113877493  | -0.625      | 0.0809          | 1.05E-14       |
| PDGFbb          | rs13412535   | 0.369       | 0.1067          | 5.38E-04       |
| PDGFbb          | rs4965869    | 0.196       | 0.0359          | 4.97E-08       |
| SCGFb           | rs116924815  | 0.616       | 0.1277          | 1.40E-06       |
| SCGFb           | rs187503377  | 0.990       | 0.1741          | 1.29E-08       |
| SCGFb           | rs4656185    | 0.197       | 0.1088          | 0.0707         |
| TRAIL           | rs192989810  | 2.129       | NA <sup>a</sup> | NA             |
| VEGF            | rs6921438    | -0.534      | 0.1811          | 0.0032         |
| VEGF            | rs7030781    | -0.141      | 0.0329          | 1.70E-05       |

<sup>a</sup> = Could not be calculated.

**Table S3** The non-heterogenic lead SNPs from the associated loci.

| <b>Cytokine</b> | <b>Rs-id</b> | <b>Gene</b> | <b>Locus</b> | <b>Position</b> | <b>A1</b> | <b>A2</b> | <b>MAF</b> | <b>Info</b> | <b>Beta<br/>(SD)</b> | <b>SE<br/>(SD)</b> | <b>P-value</b> | <b>HetPVal</b> |
|-----------------|--------------|-------------|--------------|-----------------|-----------|-----------|------------|-------------|----------------------|--------------------|----------------|----------------|
| MCP1            | rs11453649   | ACKR1       | 1q23.2       | 57697602        | A         | AT        | 0.01       | 0.94        | 0.10                 | 0.02               | 2.66E-07       | 0.56           |
| SCGFb           | rs184243701  | F5          | 1q24.2       | 158862992       | T         | C         | 0.26       | 0.94        | -0.67                | 0.14               | 1.46E-06       | 0.21           |
| IL-18           | rs1090846    | NLRC4       | 2p22.3       | 31816341        | T         | C         | 0.31       | 0.99        | 0.17                 | 0.03               | 1.10E-11       | 0.36           |
| PDGFbb          | rs1035311    | SERPINE2    | 2q36.1       | 225173500       | T         | C         | 0.42       | 0.99        | 0.10                 | 0.02               | 1.87E-10       | 0.11           |
| Eotaxin         | rs10433605   | ACKR2       | 3p22.1       | 42868074        | T         | C         | 0.26       | 0.99        | 0.14                 | 0.02               | 1.23E-15       | 0.58           |
| GROa            | rs10015342   | CXCL1       | 4q13.3       | 74713799        | A         | T         | 0.19       | 0.97        | -0.19                | 0.03               | 1.86E-10       | 0.12           |
| VEGF            | rs1740077    | VEGFA       | 6p21.1       | 43949907        | T         | C         | 0.44       | 1.00        | 0.10                 | 0.02               | 1.82E-08       | 0.19           |
| VEGF            | rs10812481   | VLDLR       | 9p24.2       | 2694596         | T         | C         | 0.22       | 0.93        | -0.11                | 0.02               | 1.67E-07       | 0.39           |
| CTACK           | rs10972164   | IL11RA      | 9p13.3       | 34604136        | A         | G         | 0.23       | 0.99        | -0.18                | 0.03               | 1.16E-10       | 0.40           |
| SCGFb           | rs10507170   | STAB2       | 12q23.3      | 104245046       | A         | G         | 0.07       | 0.97        | -0.24                | 0.05               | 1.48E-07       | 0.19           |
| PDGFbb          | rs8024621    | PCSK6       | 15q26.3      | 101972931       | A         | G         | 0.09       | 0.99        | -0.15                | 0.03               | 7.00E-08       | 0.68           |
| MIP1b           | rs1005552    | CCL4L1      | 17q12        | 34949598        | T         | C         | 0.41       | 1.00        | 0.13                 | 0.02               | 1.42E-15       | 0.25           |
| TRAIL           | rs1020839    | MEP1B       | 18q12.1      | 28989674        | T         | C         | 0.12       | 0.99        | -0.19                | 0.02               | 1.28E-14       | 0.95           |
| SCGFb           | rs55716780   | CLEC11A     | 19q13.33     | 51314791        | T         | C         | 0.18       | 0.78        | 0.18                 | 0.03               | 1.35E-07       | 0.99           |
| CTACK           | rs135570     | PPARA       | 22q13.31     | 46532781        | A         | G         | 0.43       | 1.00        | -0.12                | 0.02               | 2.36E-07       | 0.18           |

Positions refers to Human Genome Build 37. A2 is the effect allele. HetPVal reports the effect size heterogeneity statistics between the cohorts.

**Table S4** Raw mean cytokine concentrations in the Cardiovascular Risk in Young Finns Study by lead SNP allele

| Trait   | Rsid        | Mean (SD)        |                  |                  | Number of subjects |      |      |
|---------|-------------|------------------|------------------|------------------|--------------------|------|------|
|         |             | A1               | A12              | A2               | A1                 | A12  | A2   |
| MCP1    | rs12075     | 29.8 (36.9)      | 33.2 (10.2)      | 44 (15.7)        | 559                | 1177 | 707  |
| SCGFb   | rs4656185   | 10905.2 (4478.4) | 12366.6 (5167.7) | 14068.5 (5329.7) | 1256               | 981  | 206  |
| IL-18   | rs385076    | 61.2 (32.7)      | 70.1 (36.8)      | 78.4 (40.6)      | 312                | 1033 | 1098 |
| PDGFbb  | rs13412535  | 8331.4 (2743.9)  | 9836.3 (3288.5)  | 12224.7 (4496.6) | 1627               | 742  | 74   |
| Eotaxin | rs2228467   | 137.2 (199.6)    | 159.1 (249.4)    | 192 (66.7)       | 2085               | 347  | 11   |
| MIP1b   | rs113010081 | 87.3 (79.3)      | 99 (28.8)        | 163.1 (67.7)     | 1840               | 560  | 43   |
| IL-17   | rs1530455   | 303.3 (152)      | 285.6 (118.2)    | 276.4 (105.3)    | 289                | 1136 | 1018 |
| TRAIL   | esv2656942  | 152.9 (122.5)    | 126.1 (77.6)     | 95.2 (30)        | 2260               | 178  | 5    |
| HGF     | rs3748034   | 543.9 (206.5)    | 569.6 (212.8)    | 582.8 (202.9)    | 1892               | 512  | 39   |
| GROa    | rs508977    | 82.1 (41.9)      | 100.1 (50.5)     | 129.3 (63.2)     | 1398               | 906  | 139  |
| IP10    | rs141053179 | 719.5 (542.9)    | 1193 (555.4)     | NA (NA)          | 2405               | 38   | 0    |
| IL-18   | rs17229943  | 71.4 (38.4)      | 79.7 (38)        | 102.7 (46.2)     | 2085               | 346  | 12   |
| VEGF    | rs6921438   | 115.2 (49.4)     | 79.7 (41.3)      | 45.5 (23.8)      | 672                | 1247 | 524  |
| HGF     | rs5745687   | 553.7 (208.3)    | 505.4 (202.1)    | 543 (32)         | 2244               | 196  | 3    |
| VEGF    | rs7030781   | 89.1 (49.2)      | 82.6 (49.9)      | 68.2 (32.5)      | 832                | 1185 | 426  |
| CTACK   | rs2070074   | 874.9 (245)      | 753.7 (207)      | 592.2 (210.7)    | 1922               | 482  | 39   |
| IL2ra   | rs12722497  | 83.1 (59.1)      | 108.5 (41.9)     | 142.7 (44.5)     | 2152               | 283  | 8    |
| VEGF    | rs10761731  | 77 (42.6)        | 85.2 (50.1)      | 87.4 (50.7)      | 976                | 1120 | 347  |
| IL-18   | rs71478720  | 76.7 (42.4)      | 68.7 (32.7)      | 59.5 (25.4)      | 1395               | 917  | 131  |
| SCGFb   | rs187503377 | 11661.8 (4890.6) | 14689.9 (5447.7) | NA (NA)          | 2358               | 85   | 0    |
| IL-16   | rs4778636   | 88 (63.9)        | 53.8 (47.2)      | NA (NA)          | 2220               | 218  | 5    |
| PDGFbb  | rs4965869   | 8488.7 (2921.7)  | 9250.6 (3158.5)  | 10375.6 (3677.4) | 1377               | 896  | 170  |
| MIP1b   | rs113877493 | 98.5 (83.5)      | 77.1 (23.8)      | 55.7 (11.8)      | 1713               | 660  | 70   |
| TRAIL   | rs192989810 | 140.8 (80.6)     | 551.5 (410.8)    | NA (NA)          | 2386               | 57   | 0    |
| SCGFb   | rs116924815 | 11659 (4917)     | 13696 (5003)     | 14810 (NA)       | 2309               | 131  | 3    |
| MIF     | rs2330634   | 211.3 (182.3)    | 182.8 (119.7)    | 168.1 (140.3)    | 326                | 1146 | 971  |
| CTACK   | rs201003839 | 767.6 (217.1)    | 819.5 (228.5)    | 877.7 (254)      | 178                | 934  | 1331 |



**Table S5** Genomic inflation factors from meta-analyses calculated by METAL software for each involved sample

| <b>Trait</b>    | <b>Genomic lambda</b> |             |             |
|-----------------|-----------------------|-------------|-------------|
|                 | <b>YFS</b>            | <b>FR97</b> | <b>FR02</b> |
| <b>bNGF</b>     | 0.999                 | NA          | 1.012       |
| <b>CTACK</b>    | 1.004                 | NA          | 0.992       |
| <b>Eotaxin</b>  | 0.998                 | 1.012       | 1.006       |
| <b>FGFBasic</b> | 0.999                 | 1.007       | 0.997       |
| <b>GCSF</b>     | 0.994                 | 1.006       | 0.989       |
| <b>GROa</b>     | 0.994                 | NA          | 0.986       |
| <b>HGF</b>      | 0.986                 | 1.018       | 1           |
| <b>IFNg</b>     | 0.999                 | 1.01        | 1.024       |
| <b>IL-10</b>    | 1.004                 | 1.003       | 1.007       |
| <b>IL-12p70</b> | 1.009                 | 1.009       | 1.009       |
| <b>IL-13</b>    | 1.006                 | NA          | 1.001       |
| <b>IL-16</b>    | 0.997                 | NA          | 0.993       |
| <b>IL-17</b>    | 0.997                 | 1.011       | 1.011       |
| <b>IL-18</b>    | 0.991                 | NA          | 1.007       |
| <b>IL-1b</b>    | 0.998                 | NA          | 1.015       |
| <b>IL1ra</b>    | 0.998                 | NA          | 1.008       |
| <b>IL-2</b>     | 0.998                 | NA          | 1.003       |
| <b>IL2ra</b>    | 0.993                 | NA          | 1.006       |
| <b>IL-4</b>     | 1.001                 | 1.017       | 1.009       |
| <b>IL-5</b>     | 0.992                 | NA          | 1.004       |
| <b>IL-6</b>     | 0.995                 | 1.018       | 0.99        |
| <b>IL-7</b>     | 1                     | NA          | 0.984       |
| <b>IL-8</b>     | 0.996                 | NA          | 0.987       |
| <b>IL-9</b>     | 1.008                 | NA          | 1.001       |
| <b>IP10</b>     | 1.001                 | NA          | 1.005       |
| <b>MCP1</b>     | 1.007                 | 1.017       | 1.01        |
| <b>MCP3</b>     | 1.004                 | NA          | 1.001       |
| <b>MCSF</b>     | 0.99                  | NA          | 0.994       |
| <b>MIF</b>      | 1.004                 | NA          | 0.999       |
| <b>MIG</b>      | 0.993                 | NA          | 0.994       |
| <b>MIP1a</b>    | 1.004                 | NA          | 1.001       |
| <b>MIP1b</b>    | 0.999                 | 1.008       | 1.003       |
| <b>PDGFbb</b>   | 1.009                 | 1.013       | 1.007       |
| <b>RANTES</b>   | 0.993                 | NA          | 1.011       |
| <b>SCF</b>      | 1                     | 1.011       | 0.993       |
| <b>SCGFb</b>    | 1.002                 | NA          | 0.999       |
| <b>SDF1a</b>    | 0.994                 | 1.017       | 0.995       |
| <b>TNFa</b>     | 1.006                 | NA          | 1.001       |
| <b>TNFb</b>     | 1.004                 | NA          | 0.998       |
| <b>TRAIL</b>    | 0.999                 | 1.005       | 0.999       |
| <b>VEGF</b>     | 1.017                 | 1.014       | 1.004       |

NA denotes that cytokine measurements were not available from the study.

**Table S7** Variance explained by identified SNPs

| <b>Cytokine</b> | <b>Proportion of total variance explained</b> |
|-----------------|-----------------------------------------------|
| MIP1b           | 0.343                                         |
| VEGF            | 0.149                                         |
| TRAIL           | 0.141                                         |
| GROa            | 0.096                                         |
| IL-13           | 0.089                                         |
| IL-12p70        | 0.076                                         |
| PDGFbb          | 0.070                                         |
| SCGFb           | 0.068                                         |
| IL-18           | 0.068                                         |
| IL2ra           | 0.066                                         |
| CTACK           | 0.053                                         |
| IL-7            | 0.052                                         |
| IL-10           | 0.045                                         |
| MIF             | 0.040                                         |
| Eotaxin         | 0.038                                         |
| IL-16           | 0.037                                         |
| MCP1            | 0.036                                         |
| IP10            | 0.034                                         |
| MIG             | 0.022                                         |
| HGF             | 0.012                                         |
| MCP1            | 0.009                                         |
| SCF             | 0.006                                         |
| IL-17           | 0.005                                         |
